# Supplementary material for: A systematic assessment of Cochrane reviews and systematic reviews published in high-impact medical journals related to cancer
Source: PubMed Central journal article supplement — BMJ Open. 2018 Mar 25;8(3):e020869. doi: 10.1136/bmjopen-2017-020869 (PMC5875625; doi:10.1136/bmjopen-2017-020869), 2018-03-25
Supplement: bmjopen-2017-020869.draft_revisions.pdf [file bmjopen-2017-020869.draft_revisions.pdf]

# BMJ Open

BMJ Open is committed to open peer review. As part of this commitment we make the peer review history of every article we publish publicly available.

When an article is published we post the peer reviewers' comments and the authors' responses online. We also post the versions of the paper that were used during peer review. These are the versions that the peer review comments apply to.

The versions of the paper that follow are the versions that were submitted during the peer review process. They are not the versions of record or the final published versions. They should not be cited or distributed as the published version of this manuscript.

BMJ Open is an open access journal and the full, final, typeset and author-corrected version of record of the manuscript is available on our site with no access controls, subscription charges or pay-per-view fees (<http://bmjopen.bmj.com>).

If you have any questions on BMJ Open's open peer review process please email [info.bmjopen@bmj.com](mailto:info.bmjopen@bmj.com)

# BMJ Open

## A Systematic Assessment of Cochrane Reviews and Systematic Reviews Published in High-Impact Medical Journals Related to Cancer

|                               |                                                                                                                                                                                                                                                                                                                                                                                                                                                                                                                                                             |
|-------------------------------|-------------------------------------------------------------------------------------------------------------------------------------------------------------------------------------------------------------------------------------------------------------------------------------------------------------------------------------------------------------------------------------------------------------------------------------------------------------------------------------------------------------------------------------------------------------|
| Journal:                      | <i>BMJ Open</i>                                                                                                                                                                                                                                                                                                                                                                                                                                                                                                                                             |
| Manuscript ID                 | bmjopen-2017-020869                                                                                                                                                                                                                                                                                                                                                                                                                                                                                                                                         |
| Article Type:                 | Research                                                                                                                                                                                                                                                                                                                                                                                                                                                                                                                                                    |
| Date Submitted by the Author: | 28-Nov-2017                                                                                                                                                                                                                                                                                                                                                                                                                                                                                                                                                 |
| Complete List of Authors:     | Goldkuhle, Marius; Uniklinik Koln, Department I of Internal Medicine<br>Narayan, Vikram; Minneapolis Veterans Administration Health Care System, Urology Section; University of Minnesota, Department of Urology<br>Weigl, Aaron; Uniklinik Koln Klinik I fur Innere Medizin<br>Dahm, , Philipp ; Minneapolis Veterans Administration Health Care System, Urology Section; University of Minnesota, Department of Urology<br>Skoetz, Nicole; University Hospital of Cologne , Cochrane Haematological Malignancies Group; Department I of Internal Medicine |
| Keywords:                     | methodological systematic review, AMSTAR, quality assessment                                                                                                                                                                                                                                                                                                                                                                                                                                                                                                |
|                               |                                                                                                                                                                                                                                                                                                                                                                                                                                                                                                                                                             |

SCHOLARONE™  
Manuscripts

Peer Review Only

1  
2  
3  
4  
5  
6 **A Systematic Assessment of Cochrane Reviews and Systematic Reviews Published in High-**  
7 **Impact Medical Journals Related to Cancer**  
8  
9  
10  
11  
12  
13  
14  
15

16 Marius Goldkuhle, Masters Student;<sup>1</sup> Vikram M. Narayan, House Officer;<sup>2</sup> Aaron Weigl,  
17 Research Associate;<sup>1</sup> Philipp Dahm, Professor;<sup>2</sup> and Nicole Skoetz, MD Senior Lecturer<sup>1</sup>  
18  
19  
20

21 <sup>1</sup>Department of Internal Medicine, University Hospital of Cologne, Kerpener Str. 62, 50937  
22 Cologne, Germany  
23

24 <sup>2</sup>Minneapolis Veterans Administration Health Care System and Department of Urology,  
25 University of Minnesota, Mayo Memorial Building, 420 Delaware St SE, MMC 394,  
26 Minneapolis, MN 55455, US  
27  
28

29 **Correspondence to:**  
30

31 Marius Goldkuhle, B.Sc.  
32

33 Kerpener Str. 62  
34

35 50937 Cologne, Germany  
36

37 Email: [marius.goldkuhle@uk-koeln.de](mailto:marius.goldkuhle@uk-koeln.de)  
38

39 Phone: +49 221 478-96648  
40  
41  
42  
43  
44  
45  
46  
47  
48  
49  
50  
51  
52  
53  
54  
55  
56  
57  
58  
59  
60

## **Abstract**

**Objective:** To compare cancer-related systematic reviews (SRs) published in the Cochrane Database of SRs (CDSR) and high-impact journals, with respect to type, content, quality, and citation rates.

**Design:** Methodological SR with assessment and comparison of SRs and meta-analyses. Two authors independently assessed methodological quality using an Assessment of Multiple Systematic Reviews (AMSTAR) –data based extraction form. Both authors independently screened search results, extracted content-relevant characteristics, and retrieved citation numbers of the included reviews using Clarivate Analytics Web of Science database.

**Data sources:** Cancer-related SRs were retrieved from the CDSR, as well as from the ten journals which publish oncologic SRs and had the highest impact factors, using a comprehensive search in the CDSR and MEDLINE.

**Eligibility criteria for selecting studies:** We included all cancer-related SRs and meta-analyses published from January 2011 to May 2016. Methodological SRs were excluded.

**Results:** We included 346 applicable Cochrane reviews and 215 SRs from high-impact journals. Cochrane reviews consistently met more individual AMSTAR criteria, notably with regards to an a-priori design (RR 3.89; 95% CI 3.10 to 4.88), inclusion of the grey literature and trial registries (RR 3.52; 95% CI 2.84 to 4.37) in their searches, and the reporting of excluded studies (RR 8.80; 95% CI 6.06 to 12.78). Cochrane reviews were less likely to address questions of prognosis (RR 0.04; 95% CI 0.02 to 0.09), use individual patient data (RR 0.03; 95% CI 0.01 to 0.09), or be based on non-randomised controlled trials (RR 0.04; 95% CI 0.02 to 0.09). Citation rates of Cochrane reviews were notably lower than those for high-

1  
2  
3  
4  
5  
6 impact journals (Cochrane reviews: mean number of citations 6.52 (range 0 to 143); High-  
7 impact journal SRs: 74.45 (0 to 652)).

8  
9  
10  
11 **Conclusions:** When comparing cancer-related SRs published in the CDSR versus those  
12 published in high-impact medical journals, Cochrane reviews were consistently of higher  
13 methodological quality, but were cited less frequently.  
14  
15

16  
17  
18  
19  
20  
21 **Strengths and limitations of this study**

22  
23 -Unique cross-disciplinary comparison of systematic reviews in oncology including over 550  
24 SRs.  
25

26  
27  
28 -Methodological assessment using AMSTAR, a validated and widely used tool to evaluate the  
29 quality of systematic reviews.  
30

31  
32  
33 -It was not feasible to blind the authors of this study to the source journal of a given review,  
34 which may have potentially biased the assessments.  
35  
36  
37  
38  
39  
40  
41  
42  
43  
44  
45  
46  
47  
48  
49  
50  
51  
52  
53  
54

## Introduction

The care of patients with cancer continues to be a clinical research priority as documented by an increasing number of publications of different types including systematic reviews (SRs). In fact, in recent years, oncology has been the medical discipline with the highest number of publications and the numbers continue to rise.<sup>1</sup> The large number of oncology-related research studies poses a tremendous challenge for patients, healthcare providers, and health policymakers alike when seeking to stay abreast of a particular oncologic topic. SRs follow reproducible methods to identify relevant studies for a given question, apply pre-defined and explicit eligibility criteria, perform assessments of the validity of findings, and systematically present the results. In this context, SRs can be helpful in summarizing the current best evidence for a particular clinical question to support both individual decision-making and in serving as the basis for clinical practice guidelines.<sup>2 3</sup> Cochrane is widely known for having developed many of the methodological standards based on which SRs should be conducted. These standards are specified in the 2016 updated Methodological Expectations of Cochrane Intervention Reviews (MECIR). However, a large number of oncology-related SRs are currently published by clinical journals, high-impact medical journals, oncology focused journals, as well as subspecialty journals. As the number of SRs has steadily increased over the past two decades, their methodological rigor has been drawn into scrutiny.<sup>4-6</sup> To date, no study has formally assessed the methodological quality of oncology-related SRs which assume such a prominent place in the medical literature.

In this study, we therefore sought to formally assess the methodological quality, type, content, and citation rates of oncology related SRs, comparing SRs published in high-impact medical journals with those published in the Cochrane Database of SRs (CDSR).

## Methods

The design and eligibility criteria of this project were based on an a priori written protocol. Study reporting is provided in accordance with the PRISMA statement. However, as a methodology-focused review, it was not eligible for a registration in the International Prospective Register Of Systematic Reviews (PROSPERO).

### *Patient involvement:*

Given its methodologic focus, we did not evaluate patient-related outcomes. Therefore, we also chose not to involve patients' input in its design. However, the clear intent of this study is to indirectly benefit the welfare of patients by promoting the development and dissemination of high quality systematic reviews.

### *Eligibility criteria:*

We selected all Cochrane reviews that examined questions related to oncology. We furthermore identified all cancer related SRs published in the highest impact medical journals, as defined by the InCites™ Journal Citation Report® 2014, from the same time period via an electronic database search. To reflect contemporary reviews, we chose the five year period between January 2011 and May 2016 as the study timeframe. We did not apply restrictions with regards to study design or meta-analytic methods, and also included SRs without a meta-analysis. We broadly included studies related to all types of cancer.

The ten journals with the highest impact factors that published SRs on cancer topics were: *A Cancer Journal for Clinicians*, *New England Journal of Medicine*, *The Lancet*, *JAMA*, *Lancet Oncology*, *Journal of Clinical Oncology*, *The BMJ*, *Nature Reviews Clinical Oncology*,

1  
2  
3  
4  
5  
6 *Journal of the National Cancer Institute*, and *Cancer Research*. We did not apply any  
7  
8 language restrictions, however the selected journals published exclusively in English. We  
9  
10 excluded SRs with a methodological focus. For our examination, we used the original English  
11  
12 version of each Cochrane review (given that foreign language translation exists for many  
13  
14 Cochrane reviews). In cases where one or more updates of previously published Cochrane  
15  
16 reviews existed, we based our assessment on the most recently published version within the  
17  
18 defined timeframe.  
19

### 20 21 *Study identification and selection*

22  
23 We identified all cancer-related Cochrane reviews in the CDSR from January 2011 to  
24  
25 May 2016 using the built in “Browse by topic” database function with the options “Cancer”  
26  
27 and “Stage: Review.” In a parallel step, we conducted a comprehensive literature search of  
28  
29 SRs published in the ten highest-impact journals from the same time-period on June 1st,  
30  
31 2016. An information specialist developed the search strategy for MEDLINE using the  
32  
33 following search terms: Cancer, leukaemia, tumor, tumour, leukemia, lymphoma, myeloma,  
34  
35 solid, neoplasm, meta-analysis, systematic review, publication dates: 2011 to 2016. We used  
36  
37 the following MeSH terms: Neoplasm by Histologic Type and Neoplasms by Site. The full  
38  
39 search strategy is provided in the *appendix*. Two authors independently (MG, VN) and in  
40  
41 duplicate performed title and abstract screening, full text screening, and ultimately,  
42  
43 selection of reviews to be included. We resolved discrepancies by discussion with one of two  
44  
45 other authors (NS, PD).  
46

### 47 48 *Quality assessment*

49  
50 We evaluated methodological quality with the Assessment of Multiple Systematic  
51  
52 Reviews (AMSTAR) checklist, by Shea, et al.<sup>7</sup> The checklist consists of 11 items and was  
53  
54  
55  
56  
57  
58  
59  
60



1  
2  
3  
4  
5  
6 specially developed to assess the methodological quality of SRs and meta-analyses. In cases  
7  
8 where AMSTAR combined several items into one criterion, we separated these out into 20  
9  
10 individual items for the sake of transparency but readjusted them into single items for the  
11  
12 AMSTAR scoring. A complete list of items can be found in the *appendix*; answer options were  
13  
14 “yes,” “no,” and “not applicable.” Methods like sensitivity- and subgroup-analyses, or funnel  
15  
16 plots for the assessment of publication bias require a minimum quantity of studies. For  
17  
18 example, meaningful interpretations of funnel plots require a threshold of at least ten  
19  
20 studies.<sup>8</sup> In SRs where there was evidence that these secondary analyses were planned, but  
21  
22 not be meaningfully conducted, this criterion was rated as fulfilled. Two authors (MG, VN)  
23  
24 performed the quality assessments independently and in duplicate. We resolved  
25  
26 disagreements by discussion and with a third author (NS, PD).  
27  
28

### 29 *Data extraction and extracted items*

30  
31 The included studies were then reviewed in detail as part of a clinical content  
32  
33 analysis. We extracted the review type, the study design of the included studies, and review  
34  
35 question (e.g. therapeutic, diagnostic, or prognostic) of included studies. We chose the  
36  
37 following items to reflect the review content: Cancer type (e.g. breast, lung, colorectal, but  
38  
39 also “cancer in general”, “mixed” (but not in general) and “other” (e.g. liver metastases or  
40  
41 male breast cancer), intervention (e.g. chemotherapy, “new drug” (targeted therapies, such  
42  
43 as monoclonal antibodies and small molecules)), radiotherapy, surgery, supportive (e.g.  
44  
45 interventions for cancer-related pain, rehabilitation after cancer treatment, interventions for  
46  
47 depression in cancer patients, or adjuvant bisphosphonate treatment for cancer patients), or  
48  
49 not applicable (if prognostic, diagnostic or epidemiological review question), population  
50  
51 (adults, children or both), the number of included studies, and the number of included  
52  
53  
54  
55  
56  
57  
58  
59  
60

1  
2  
3  
4  
5  
6 patients. A complete list of the 17 criteria can be found in the *appendix*. To ensure the  
7  
8 completeness of our assessment we obtained and formally considered any additional  
9  
10 information from all (online) supplements and appendices. Two authors (MG, VN)  
11  
12 independently extracted this data using a previously piloted form. The data extraction form  
13  
14 was designed a priori with consensus of four authors (MG, VN, NS, PD). Discrepancies were  
15  
16 once again resolved through discussion and third author arbitration if necessary (NS, PD).  
17

### 18 19 *Citations*

20  
21 We gathered the citation counts for both Cochrane reviews and high-impact journal  
22  
23 reviews using the Clarivate Analytics Web of Science database. Citations counts were  
24  
25 assessed on February 15th, 2017 by two authors independently (AW, MG). For updates of  
26  
27 Cochrane reviews, we considered the citations of the respective update(s) and added  
28  
29 citations from the original review, as long as the original review and any updates were  
30  
31 published within the predefined timeframe of our study.  
32

### 33 34 *Data synthesis and analysis*

35  
36 For dichotomous variables, we determined rates, and for continuous variables, we  
37  
38 calculated median and interquartile range (IQR), or mean and range. To compare the quality  
39  
40 of both groups, we used risk ratios and the corresponding 95% confidence intervals. We  
41  
42 defined an event as fulfilling a given quality indicator and have presented this data in forest  
43  
44 plots. All statistical analyses were undertaken using Review Manager Version 5.3.  
45  
46  
47  
48  
49  
50  
51  
52  
53  
54  
55  
56  
57  
58  
59  
60

## Results

### *Search results*

As shown in the study flowchart (Figure 1), our search for oncology-related Cochrane reviews identified 412 records, of which 346 were determined to be cancer related and appropriate according to our selection criteria. Our electronic database search for high-impact SRs identified 738 records, of which 215 were ultimately included, excluding seven reviews at the full-text stage which focused on methodological issues (Figure 2).<sup>9-15</sup> The references of the included articles are provided in the *online appendix*.

### *Quality*

In general, reviews published by Cochrane met each quality criterion to a greater extent than reviews published in high-impact journals (Figure 3). Cochrane reviews were more likely to report an a priori design, including the definition of the review question and a planned inclusion and exclusion criteria before conducting the review (both with a risk ratio of 3.89; 95% confidence interval (CI) 3.10 to 4.88) (AMSTAR Item 1). Differences also existed in the inclusion of unpublished and non-English literature; Cochrane reviews were more likely to include unpublished (risk ratios (RR) 3.52 (95% CI 2.84 to 4.37) and non-English studies) (RR 3.23 (95% CI 2.64 to 3.95)) (Item 4). Included studies were listed relatively equally between the two (RR 1.10; 95% CI 1.05 to 1.14) comparators, whereas a list of excluded studies, at least those rejected in the course of full-text screening, were provided almost nine times more often by Cochrane reviews (RR 8.80; 95% CI 6.06 to 12.78) (Item 5). Further, a quality assessment of the included studies (using tools such as Cochrane's Risk of Bias, the Jadad scale, or the Newcastle-Ottawa scale) were undertaken over twice as frequently in Cochrane reviews (RR 2.17; 95% CI 1.88 to 2.50) (Item 7). A meta-analysis was

1  
2  
3  
4  
5  
6 conducted in 67% (227/346) of Cochrane reviews and in 80% (173/215) of high-impact  
7  
8 journal SRs. A sensitivity analysis based on study quality or risk of bias was more commonly  
9  
10 reported in Cochrane reviews (RR 4.17; 95% CI 3.07 to 5.67). Almost 23% (53/227) of  
11  
12 Cochrane reviews planned to undertake, but did not perform sensitivity-analyses due to an  
13  
14 insufficient number of included studies, the inclusion of high risk of bias studies only, or  
15  
16 unclear information regarding study quality. Formal assessments of potential publication  
17  
18 bias like funnel plots were undertaken or planned about twice as frequently among reviews  
19  
20 produced by Cochrane (RR 1.98; 95% CI 1.63 to 2.41) than in SRs published in high impact  
21  
22 journals. However, 47.3% (107/226) of Cochrane reviews and 1.7% (3/173) of reviews from  
23  
24 high-impact journals planned, but could not perform such assessments due to an insufficient  
25  
26 number of included studies (AMSTAR Item 10). The vast majority of SRs both in Cochrane  
27  
28 reviews and high-impact journals disclosed potential conflicts of interest of the systematic  
29  
30 review authors (RR 1.01; 95% CI 1.00 to 1.03). However, potential conflicts of interest of the  
31  
32 trials included in the SRs were reported more frequently by Cochrane reviews than by SRs in  
33  
34 high-impact journals; with Cochrane reviews being more than four times as likely to provide  
35  
36 this information (RR 4.30; 95% CI 2.56 to 7.20) (Item 11).  
37  
38

### 39 *Characteristics of included SRs*

40  
41 With regards to geographical origin, the largest proportion of Cochrane reviews  
42  
43 originated from Europe (67.3%; 233/346) and relatively infrequently originated from North  
44  
45 America (7.5%; 26/346); meanwhile, high-impact journal SRs were as likely to come from  
46  
47 Europe (44.2%; 95/215) or North America (40.9%; 88/215; Table 1). Cochrane reviews were  
48  
49 much less likely to use individual patient data (IPD) (RR 0.03; 95% CI 0.01 to 0.09) compared  
50  
51 to aggregate study-level data. The majority of Cochrane reviews used the latter (95.7%;  
52  
53  
54  
55  
56  
57  
58  
59  
60

1  
2  
3  
4  
5  
6  
7  
8  
9  
10  
11  
12  
13  
14  
15  
16  
17  
18  
19  
20  
21  
22  
23  
24  
25  
26  
27  
28  
29  
30  
31  
32  
33  
34  
35  
36  
37  
38  
39  
40  
41  
42  
43  
44  
45  
46  
47  
48  
49  
50  
51  
52  
53  
54  
55  
56  
57  
58  
59  
60

331/346), with only three (0.9%; 3/346) including individual patient data exclusively, and 12 (3.5%; 12/346) using both types of data. SRs from high-impact journals were also primarily based on study level data (68.4%; 147/215), but a much larger proportion used IPD (31.2%; 67/216). Network meta-analyses were uncommon among both Cochrane reviews (0.6%; 2/346) and high-impact SRs (2.8%; 6/215).

Cochrane reviews predominantly investigated therapeutic (89%; 308/346) questions. Among SRs from high-impact journals, there were also a large number of prognostic reviews (37.2%; 80/215) in addition to therapeutic reviews (41.9%; 90/215; Figure 4). Overall, Cochrane reviews were less likely to include non-randomised controlled trials (RR 0.04; 95% CI 0.02 to 0.09). Therapeutic reviews published in the CDSR primarily included RCTs in 78.6% (242/308) or both RCTs and non-RCTs in 21.1% (65/308). High-impact journal reviews assessing therapeutic questions were primarily based on RCTs (58.9% (53/90)), with only 26.7% (24/90) based on non-RCTs.

#### *Content of included SRs*

91.9% (318/346) of the Cochrane reviews and 70.2% (151/215) high-impact journal SRs focused on adult study populations. Only 7.5% (26/346) of SRs from the CDSR and 2.8% (6/215) of reviews from high-impact journals focused solely on paediatric patients.

The largest group of Cochrane reviews addressed general cancer topics (for example: supportive measures for patients receiving cytotoxic chemotherapy) not limited to a specific type of disease (18.8 %; 65/346), followed by SRs concerning hematological malignancies (12.4%; 43/346), and breast cancer (8.4%; 29/346; Figure 5). Among SRs published in high-

1  
2  
3  
4  
5  
6 impact journals, general cancer topics was also the main category followed by breast cancer  
7  
8 in 21.4% (47/215) and colorectal cancer in 7.9% (17/215).  
9

10  
11 SRs published in Cochrane most commonly examined supportive care interventions  
12  
13 (40.3%; 126/313), followed by chemotherapy (20.1%; 63/313), and surgery (16.7%; 49/313;  
14  
15 Figure 6). Reviews in high-impact journals, on the other hand, predominantly evaluated  
16  
17 specific chemotherapy regimens (25.3%; 23/91), new drugs (18.7%; 17/91), and supportive  
18  
19 care interventions (18.7%; 17/91).  
20

21  
22 Overall, Cochrane reviews included fewer studies per review than high-impact journal  
23  
24 SRs (median: 6 studies (IQR: 2-13) compared to 18 (18-38.8)) and fewer patients (1020  
25  
26 (194.5-2845) compared to 7730 (3288-29.423)). About 11.3% (39/346) of Cochrane SRs were  
27  
28 so-called “empty reviews”, meaning the authors could not identify eligible studies to include  
29  
30 in their review. Furthermore, 35 (10.1%) reviews retrieved from the CDSR included only one  
31  
32 study. In contrast, none of the SRs in high-impact journals were empty or contained only a  
33  
34 single study.  
35

### 36 *Citations*

37  
38 Cochrane reviews were cited considerably less frequently than SRs published in high-  
39  
40 impact medical journals. The mean number of citations for Cochrane reviews was 6.92,  
41  
42 ranging from 0 to 143. High-impact journal SRs had a mean of 74.45 citations with a range  
43  
44 from 0 to 652.  
45  
46  
47  
48  
49  
50  
51  
52  
53  
54

## Discussion

### *Principal findings*

This methodological assessment found that Cochrane reviews were conducted with greater methodological rigor than SRs published in high-impact journals but were cited less frequently. The largest gap in terms of methodological quality with regards to an individual AMSTAR criterion was the reporting of excluded studies, which was met by all Cochrane reviews and only 11.2% (24/215) of SRs published by high-impact journals. Other major differences relate to the reporting of possible conflicts of interest of included studies, the existence of an a priori design, the conduct of sensitivity analyses for study quality of included studies, and the inclusion of non-published studies. High-impact SRs were more likely to be based on IPD, include non-RCTs and address questions other than therapy, namely prognosis. SRs that included only one or no included studies were published exclusively in the Cochrane Library, and not in high-impact journals.

### *Strengths and weaknesses of this systematic review*

We performed this study based on an a priori protocol, a comprehensive search strategy, and data abstraction in duplicate, which lends strength to the validity of our findings. In addition, we performed a clinical content analysis comparing the two groups of SR sources. The reliability of this work was ensured through adherence to the review methods proposed by PRISMA and Cochrane. Our quality assessment was based on AMSTAR, an instrument previously validated for the assessment of SRs from RCTs which represented the best available tool at the time when we planned and conducted this review.<sup>16 17</sup> An updated version of AMSTAR has only recently become available.<sup>18</sup>

1  
2  
3  
4  
5  
6 Given its focus on methodological quality, this study is unable to explain the missing link  
7  
8 between the high methodological quality of Cochrane reviews and relatively low citation  
9  
10 rates. Potential explanations may relate to the clinical topic areas, and too great a focus on  
11  
12 evidence from RCTs, which has long been a hallmark of Cochrane reviews. In addition,  
13  
14 Cochrane reviews that include none (“empty reviews”) or only one study are less likely to  
15  
16 provide newsworthy results and yield high citation rates.  
17

18  
19 The Cochrane Library permits co-publication of Cochrane reviews in other journals, which is  
20  
21 however subject to formal pre-approval. A large number of co-published reviews could have  
22  
23 potentially biased our results, though we identified only two reviews with this issue; this this  
24  
25 concern is only of minor relevance.<sup>19 20</sup>  
26

#### 27 28 *Strengths and weaknesses in relation to other systematic reviews*

29  
30 In 2016, an assessment of cross-sectional SRs was published which included a similar  
31  
32 comparison of Cochrane and non-Cochrane reviews.<sup>5</sup> This assessment was cross-disciplinary  
33  
34 and not limited to cancer alone. It comprised of SRs published during a one month period in  
35  
36 2014, and only 3% (9/300) of the total assessed SRs came from journals with an impact  
37  
38 factor exceeding ten. Most of the randomly selected SRs and Cochrane reviews investigated  
39  
40 therapeutic questions. Similar to our study, Cochrane reviews were more likely to fulfil the  
41  
42 important methodological criteria such as protocol availability, the inclusion of unpublished  
43  
44 and grey literature, an electronic data-search in more than two databases, data extraction  
45  
46 and study selection performed in duplicate, or the assessment of study quality. Findings  
47  
48 were also similar with regards to the proportion of reviews that did not perform a sensitivity  
49  
50 analysis based on study quality.<sup>5</sup> Another similar study by Moher et al. documented  
51  
52 improved reporting over a 10 year time frame.<sup>4</sup> A variety of other reports, including  
53  
54



1  
2  
3  
4  
5  
6 assessments in other medical research fields have identified similar deficiencies in the  
7  
8 quality of SRs but none of them have specifically focused on oncology-related reviews.<sup>6 16 21-</sup>  
9

10<sup>26</sup>

11  
12  
13 *Meaning of this methodological systematic review: explanations, implications and further*  
14  
15 *research*

16  
17 Our methodological assessment highlights the major differences that exist among  
18  
19 published SRs in oncology. Users of the medical literature should therefore not assume that  
20  
21 SRs are equivalent in their design, methodological rigor, or validity of their conclusions.

22  
23 Quality criteria for SRs are well established; one key criterion is that of an a priori protocol  
24  
25 which governs all aspects of the review process to prevent selective or biased reporting and  
26  
27 avoid duplicate publication.<sup>27-30</sup> Registration of protocols with platforms such as PROSPERO  
28  
29 can aid in holding SRs accountable in this regard; some journals have made this mandatory.<sup>31</sup>  
30  
31 Deficits in the disclosure of excluded studies, for example, narrow the transparency of study  
32  
33 selection, while absence of sensitivity analyses impede readers' accessibility of the findings  
34  
35 against the background of study quality. Conflicts of interest may also play a role in the  
36  
37 heterogeneity of published SRs.

38  
39  
40 A practical reason for differences in the reporting quality between Cochrane reviews  
41  
42 and high-impact medical journals may lie in the limited space for reporting provided in  
43  
44 printed medical journals. A recent assessment of meta-analyses of surgical interventions  
45  
46 supports the assumption of the negative association between limited publication space and  
47  
48 completeness of reporting.<sup>25</sup> Cochrane does not impose space restrictions and as such  
49  
50 Cochrane SR authors have more freedom to provide complete reporting. However, given  
51  
52 that most journals now offer the opportunity to provide additional e-content on the  
53  
54

1  
2  
3  
4  
5  
6 internet, there should be fewer reasons for less than complete transparency. In this  
7  
8 assessment, we took care to include all available content, including online supplementary  
9  
10 tables and appendices in our assessment. Published Cochrane reviews typically also undergo  
11  
12 a more rigorous development process that includes the compulsory publication of a protocol  
13  
14 that has previously undergone internal editorial review and external peer review as specified  
15  
16 in the organization's MECIR policy. This may be the main reason why Cochrane reviews are  
17  
18 much more likely to meet more of the requirements of transparent reporting checklists.<sup>17 32</sup>

19  
20 <sup>33</sup> Journal editors should similarly mandate strict adherence to PRISMA and other reporting  
21  
22 guidelines.  
23

24  
25         Given the considerable investment of resources that goes into development of high  
26  
27 quality Cochrane reviews, their relatively low impact is a concern. It appears critically  
28  
29 important that Cochrane editors take greater initiative at directing review authors to topics  
30  
31 where the greatest clinical interest lies.  
32

33  
34         This work demonstrates the need to critically assess SRs prior to using their evidence.  
35  
36 For clinicians, the *Users' Guide to the Medical Literature* by Murad, et al.<sup>30</sup> provides a  
37  
38 practical framework for assessing the validity, impact and applicability of SRs. For  
39  
40 researchers and policy-makers aside from AMSTAR, the recently introduced ROBIS tool  
41  
42 allows to comprehensively evaluate possible risk of bias in SRs at the review level.<sup>34</sup> At  
43  
44 present it covers SRs with interventional, diagnostic, prognostic, and etiologic review  
45  
46 questions and involves a three domain appraisal of the relevance of the respective review,  
47  
48 an evaluation of possible risks of bias during the review process, and a concluding judgment  
49  
50 of overall risk of bias of the review findings.<sup>34</sup>  
51  
52  
53  
54  
55  
56  
57  
58  
59  
60

**Conclusion**

Cancer-related SRs that are published in the CDSR demonstrate higher adherence to methodological and reporting standards than cancer-related SRs published in high-impact medical journals but are cited less frequently. Our assessment underscores the importance of performing a critical appraisal of SRs before including their evidence into guideline development or making individual clinical decisions.

## **Acknowledgements**

**Contributors:** MG designed the data collection tools and analysis, selected studies, analysed and extracted data, and drafted and revised the paper. VN designed the data collection tools and analysis, selected studies, analysed and extracted data, and drafted and revised the paper. AW extracted and analysed data and revised the paper. PD initiated the project, designed the data collection tools and analysis, selected studies, monitored data collection and analysis, and revised the paper. NS initiated the project, designed the data collection tools and analysis, selected studies, monitored data collection and analysis, and revised the paper. All authors approved the final version of the article. All authors, external and internal, had full access to all of the data (including statistical reports and tables) in the study and can take responsibility for the integrity of the data and the accuracy of the data analysis.

**Copyright:** The Corresponding Author has the right to grant on behalf of all authors and does grant on behalf of all authors, a worldwide licence to the BMJ Publishing Group Ltd and its licensees in perpetuity, in all forms, formats and media (whether known now or created in the future), to i) publish, reproduce, distribute, display and store the Contribution, ii) translate the Contribution into other languages, create adaptations, reprints, include within collections and create summaries, extracts and/or, abstracts of the Contribution, iii) create any other derivative work(s) based on the Contribution, iv) to exploit all subsidiary rights in the Contribution, v) the inclusion of electronic links from the Contribution to third party material where-ever it may be located; and, vi) licence any third party to do any or all of the above. We attest that we have obtained appropriate permissions and paid any required fees for use of copyright protected materials.

1  
2  
3  
4  
5  
6  
7  
8  
9  
10  
11  
12  
13  
14  
15  
16  
17  
18  
19  
20  
21  
22  
23  
24  
25  
26  
27  
28  
29  
30  
31  
32  
33  
34  
35  
36  
37  
38  
39  
40  
41  
42  
43  
44  
45  
46  
47  
48  
49  
50  
51  
52  
53  
54  
55  
56  
57  
58  
59  
60

**Funding:** Two authors received travel grants by Cochrane to attend and present data at the 23rd Cochrane Colloquium in Seoul, 2016. This research received no other specific grant from any funding agency in the public, commercial or not-for-profit sectors.

**Competing interests:** All authors have completed the ICMJE uniform disclosure form at [www.icmje.org/coi\\_disclosure.pdf](http://www.icmje.org/coi_disclosure.pdf) and declare: MG, AW and NS are part of the Cochrane Haematological Malignancies Group, PD is part of the Cochrane Urology Group. Further they declare: No other support from any organisation for the submitted work; no financial relationships with any organisations that might have an interest in the submitted work in the previous three years; no other relationships or activities that could appear to have influenced the submitted work.

**Ethical approval:** Not required

**Data sharing:** No additional data available

**Transparency:** We affirm that the manuscript is an honest, accurate, and transparent account of the study being reported; that no important aspects of the study have been omitted; and that any discrepancies from the study as planned have been explained.

1  
2  
3  
4  
5  
6 **Figure legends**  
7

8  
9 Figure 1. PRISMA flow diagram of Cochrane reviews  
10

11  
12 Figure 2. PRISMA flow diagram of high-impact journal SRs  
13

14  
15 Figure 3. Forrest plot comparing to what extent Cochrane reviews and SRs published in high-  
16 impact journals meet criteria for methodological quality  
17

18  
19 Figure 4. Distribution of Cochrane reviews and high-impact journal SRs by review question  
20

21  
22 Figure 5. Distribution of Cochrane reviews and high-impact journal SRs by disease  
23

24  
25 Figure 6. Distribution of Cochrane reviews and high-impact journal SRs by intervention  
26  
27  
28  
29  
30  
31  
32  
33  
34  
35  
36  
37  
38  
39  
40  
41  
42  
43  
44  
45  
46  
47  
48  
49  
50  
51  
52  
53  
54

## References

1. 2015 Journal Citation Reports®: Clarivate Analytics; 2017 [
2. Woolf S, Schunemann HJ, Eccles MP, et al. Developing clinical practice guidelines: types of evidence and outcomes; values and economics, synthesis, grading, and presentation and deriving recommendations. *Implementation science : IS* 2012;7:61. doi: 10.1186/1748-5908-7-61 [published Online First: 2012/07/06]
3. Mulrow CD. Rationale for systematic reviews. *BMJ (Clinical research ed)* 1994;309(6954):597-9. [published Online First: 1994/09/03]
4. Moher D, Tetzlaff J, Tricco AC, et al. Epidemiology and reporting characteristics of systematic reviews. *PLoS medicine* 2007;4(3):e78. doi: 10.1371/journal.pmed.0040078 [published Online First: 2007/03/29]
5. Page MJ, Shamseer L, Altman DG, et al. Epidemiology and Reporting Characteristics of Systematic Reviews of Biomedical Research: A Cross-Sectional Study. *PLoS medicine* 2016;13(5):e1002028. doi: 10.1371/journal.pmed.1002028 [published Online First: 2016/05/25]
6. Han JL, Gandhi S, Bockoven CG, et al. The landscape of systematic reviews in urology (1998 to 2015): an assessment of methodological quality. *BJU International* 2017;119(4):638-49. doi: 10.1111/bju.13653
7. Shea BJ, Grimshaw JM, Wells GA, et al. Development of AMSTAR: a measurement tool to assess the methodological quality of systematic reviews. *BMC medical research methodology* 2007;7:10. doi: 10.1186/1471-2288-7-10 [published Online First: 2007/02/17]
8. Sterne JA, Sutton AJ, Ioannidis JP, et al. Recommendations for examining and interpreting funnel plot asymmetry in meta-analyses of randomised controlled trials. *BMJ (Clinical research ed)* 2011;343:d4002. doi: 10.1136/bmj.d4002 [published Online First: 2011/07/26]
9. Flaherty KT, Hennig M, Lee SJ, et al. Surrogate endpoints for overall survival in metastatic melanoma: a meta-analysis of randomised controlled trials. *The Lancet Oncology* 2014;15(3):297-304. doi: 10.1016/s1470-2045(14)70007-5 [published Online First: 2014/02/04]
10. Freund KM, Battaglia TA, Calhoun E, et al. Impact of patient navigation on timely cancer care: the Patient Navigation Research Program. *Journal of the National Cancer Institute* 2014;106(6):dju115. doi: 10.1093/jnci/dju115 [published Online First: 2014/06/19]
11. Lemieux J, Goodwin PJ, Bordeleau LJ, et al. Quality-of-life measurement in randomized clinical trials in breast cancer: an updated systematic review (2001-2009). *Journal of the National Cancer Institute* 2011;103(3):178-231. doi: 10.1093/jnci/djq508 [published Online First: 2011/01/11]
12. Paoletti X, Oba K, Bang YJ, et al. Progression-free survival as a surrogate for overall survival in advanced/recurrent gastric cancer trials: a meta-analysis. *Journal of the National Cancer Institute* 2013;105(21):1667-70. doi: 10.1093/jnci/djt269 [published Online First: 2013/10/11]

13. Peron J, Pond GR, Gan HK, et al. Quality of reporting of modern randomized controlled trials in medical oncology: a systematic review. *Journal of the National Cancer Institute* 2012;104(13):982-9. doi: 10.1093/jnci/djs259 [published Online First: 2012/07/05]
14. Zikos E, Ghislain I, Coens C, et al. Health-related quality of life in small-cell lung cancer: a systematic review on reporting of methods and clinical issues in randomised controlled trials. *The Lancet Oncology* 2014;15(2):e78-89. doi: 10.1016/s1470-2045(13)70493-5 [published Online First: 2014/02/01]
15. Henson L, Gao W, Higginson I, et al. Emergency department attendance by patients with cancer in the last month of life: a systematic review and meta-analysis. *Lancet (London, England)* 2015;385 Suppl 1:S41. doi: 10.1016/s0140-6736(15)60356-7 [published Online First: 2015/08/28]
16. Shea BJ, Hamel C, Wells GA, et al. AMSTAR is a reliable and valid measurement tool to assess the methodological quality of systematic reviews. *Journal of clinical epidemiology* 2009;62(10):1013-20. doi: 10.1016/j.jclinepi.2008.10.009 [published Online First: 2009/02/24]
17. Shea BJ, Bouter LM, Peterson J, et al. External validation of a measurement tool to assess systematic reviews (AMSTAR). *PloS one* 2007;2(12):e1350. doi: 10.1371/journal.pone.0001350 [published Online First: 2007/12/27]
18. Shea BJ, Reeves BC, Wells G, et al. AMSTAR 2: a critical appraisal tool for systematic reviews that include randomised or non-randomised studies of healthcare interventions, or both. *BMJ (Clinical research ed)* 2017;358 doi: 10.1136/bmj.j4008
19. Kong A, Johnson N, Kitchener HC, et al. Adjuvant radiotherapy for stage I endometrial cancer: an updated Cochrane systematic review and meta-analysis. *Journal of the National Cancer Institute* 2012;104(21):1625-34. doi: 10.1093/jnci/djs374 [published Online First: 2012/09/11]
20. Kong A, Johnson N, Kitchener HC, et al. Adjuvant radiotherapy for stage I endometrial cancer. *The Cochrane database of systematic reviews* 2012(4):Cd003916. doi: 10.1002/14651858.CD003916.pub4 [published Online First: 2012/04/20]
21. Fleming PS, Koletsi D, Seehra J, et al. Systematic reviews published in higher impact clinical journals were of higher quality. *Journal of clinical epidemiology* 2014;67(7):754-9. doi: 10.1016/j.jclinepi.2014.01.002 [published Online First: 2014/04/09]
22. Bafeta A, Trinquart L, Seror R, et al. Analysis of the systematic reviews process in reports of network meta-analyses: methodological systematic review. *BMJ (Clinical research ed)* 2013;347:f3675. doi: 10.1136/bmj.f3675 [published Online First: 2013/07/03]
23. Cullis PS, Gudlaugsdottir K, Andrews J. A systematic review of the quality of conduct and reporting of systematic reviews and meta-analyses in paediatric surgery. *PloS one* 2017;12(4):e0175213. doi: 10.1371/journal.pone.0175213 [published Online First: 2017/04/07]



24. Fleming PS, Seehra J, Polychronopoulou A, et al. Cochrane and non-Cochrane systematic reviews in leading orthodontic journals: a quality paradigm? *European journal of orthodontics* 2013;35(2):244-8. doi: 10.1093/ejo/cjs016 [published Online First: 2012/04/19]
25. Adie S, Ma D, Harris IA, et al. Quality of conduct and reporting of meta-analyses of surgical interventions. *Annals of surgery* 2015;261(4):685-94. doi: 10.1097/sla.0000000000000836 [published Online First: 2015/01/13]
26. Windsor B, Popovich I, Jordan V, et al. Methodological quality of systematic reviews in subfertility: a comparison of Cochrane and non-Cochrane systematic reviews in assisted reproductive technologies. *Human reproduction (Oxford, England)* 2012;27(12):3460-6. doi: 10.1093/humrep/des342 [published Online First: 2012/10/05]
27. Shamseer L, Moher D, Clarke M, et al. Preferred reporting items for systematic review and meta-analysis protocols (PRISMA-P) 2015: elaboration and explanation. *BMJ : British Medical Journal* 2015;349 doi: 10.1136/bmj.g7647
28. Page MJ, McKenzie JE, Kirkham J, et al. Bias due to selective inclusion and reporting of outcomes and analyses in systematic reviews of randomised trials of healthcare interventions. *The Cochrane database of systematic reviews* 2014(10):Mr000035. doi: 10.1002/14651858.MR000035.pub2 [published Online First: 2014/10/02]
29. Stewart L, Moher D, Shekelle P. Why prospective registration of systematic reviews makes sense. *Systematic reviews* 2012;1:7. doi: 10.1186/2046-4053-1-7 [published Online First: 2012/05/17]
30. Murad M, Montori VM, Ioannidis JA, et al. How to read a systematic review and meta-analysis and apply the results to patient care: Users' guides to the medical literature. *JAMA* 2014;312(2):171-79. doi: 10.1001/jama.2014.5559
31. Dahm P. Raising the bar for systematic reviews with Assessment of Multiple Systematic Reviews (AMSTAR). *BJU International* 2017;119(2):193-93. doi: 10.1111/bju.13754
32. Higgins JG, S. (editors). *Cochrane Handbook for Systematic Reviews of Interventions* Version 5.1.0 [updated March 2011]. March 2011 ed: The Cochrane Collaboration, 2011.
33. Julian PT Higgins TL, Jackie Chandler, David Tovey, Rachel Churchill. *Methodological Expectations of Cochrane Intervention Reviews*. London: Cochrane 2016.
34. Whiting P, Savović J, Higgins JPT, et al. ROBIS: A new tool to assess risk of bias in systematic reviews was developed. *Journal of clinical epidemiology*;69:225-34. doi: 10.1016/j.jclinepi.2015.06.005

**Table 1: Baseline characteristics of the included Cochrane reviews and high-impact journal SRs**

|                                                | <b>Cochrane</b>                 | <b>High-impact journals</b>                  |                                  |                            |                               |                       |                      |                    |                               |                              |
|------------------------------------------------|---------------------------------|----------------------------------------------|----------------------------------|----------------------------|-------------------------------|-----------------------|----------------------|--------------------|-------------------------------|------------------------------|
|                                                | <b>Cochrane reviews (n=346)</b> | <b>Total high-impact journal SRs (n=215)</b> | <b>J Natl Cancer Inst (n=56)</b> | <b>J Clin Oncol (n=56)</b> | <b>Lancet Oncology (n=53)</b> | <b>The BMJ (n=22)</b> | <b>Lancet (n=14)</b> | <b>JAMA (n=12)</b> | <b>CA Cancer J Clin (n=1)</b> | <b>Cancer Research (n=1)</b> |
| <b>Year first published (Number of SR (%))</b> |                                 |                                              |                                  |                            |                               |                       |                      |                    |                               |                              |
| 2011                                           | 45 (13.1)                       | 45 (20.9)                                    | 9 (16.1)                         | 14 (25)                    | 13 (24.5)                     | 2 (9.1)               | 4 (28.6)             | 3 (25)             |                               |                              |
| 2012                                           | 60 (17.3)                       | 50 (23.2)                                    | 20 (35.7)                        | 11 (19.6)                  | 11 (20.8)                     | 4 (18.2)              | 1 (7.1)              | 3 (25)             |                               |                              |
| 2013                                           | 80 (23.1)                       | 31 (14.4)                                    | 7 (12.5)                         | 8 (14.3)                   | 8 (15.1)                      | 5 (22.7)              | 2 (14.3)             | 1 (8.3)            |                               |                              |
| 2014                                           | 59 (17.1)                       | 51 (23.7)                                    | 11 (19.6)                        | 10 (17.9)                  | 15 (28.3)                     | 7 (31.8)              | 4 (28.6)             | 4 (33.3)           |                               |                              |
| 2015                                           | 69 (19.9)                       | 32 (14.9)                                    | 6 (10.7)                         | 11 (19.6)                  | 5 (9.4)                       | 4 (18.2)              | 3 (21.4)             | 1 (8.3)            | 1 (100)                       | 1 (100)                      |
| 2016                                           | 33 (9.5)                        | 6 (2.8)                                      | 3 (5.4)                          | 2 (3.6)                    | 1 (1.9)                       |                       |                      |                    |                               |                              |
| <b>Region (Number of SR (%))</b>               |                                 |                                              |                                  |                            |                               |                       |                      |                    |                               |                              |
| Europe                                         | 233 (67.3)                      | 95 (44.2)                                    | 14 (25)                          | 20 (35.7)                  | 34 (64.2)                     | 12 (54.5)             | 13 (92.9)            | 1 (8.3)            | 1 (100)                       |                              |
| North America                                  | 26 (7.5)                        | 88 (40.9)                                    | 33 (58.9)                        | 27 (48.2)                  | 10 (18.9)                     | 6 (27.3)              | 1 (7.1)              | 10 (83.3)          |                               | 1 (100)                      |
| Asia                                           | 49 (14.2)                       | 16 (7.4)                                     | 6 (10.7)                         | 3 (5.4)                    | 3 (5.7)                       | 3 (13.6)              |                      | 1 (8.3)            |                               |                              |
| Australia/<br>New Zealand                      | 19 (5.5)                        | 14 (6.5)                                     | 2 (3.6)                          | 6 (10.7)                   | 6 (11.3)                      |                       |                      |                    |                               |                              |
| South America                                  | 13 (3.8)                        | 1 (0.5)                                      | 1 (1.8)                          |                            |                               |                       |                      |                    |                               |                              |
| Africa                                         | 6 (1.7)                         | 1 (0.5)                                      |                                  |                            |                               | 1 (4.5)               |                      |                    |                               |                              |
| <b>Review type (Number of SR (%))</b>          |                                 |                                              |                                  |                            |                               |                       |                      |                    |                               |                              |
| Study-level                                    | 331 (95.7)                      | 147 (68.4)                                   | 39 (69.6)                        | 40 (71.4)                  | 35 (66)                       | 19 (86.4)             | 1 (7.1)              | 11 (91.7)          | 1 (100)                       | 1 (100)                      |

1  
2  
3  
4  
5  
6  
7  
8  
9  
10  
11  
12  
13  
14  
15  
16  
17  
18  
19  
20  
21  
22  
23  
24  
25  
26  
27  
28  
29  
30  
31  
32  
33  
34  
35  
36  
37  
38  
39  
40  
41  
42  
43  
44  
45  
46  
47

|                                                 | <u>Cochrane</u>                 | <u>High-impact journals</u>                  |                                  |                            |                               |                       |                      |                    |                               |                              |
|-------------------------------------------------|---------------------------------|----------------------------------------------|----------------------------------|----------------------------|-------------------------------|-----------------------|----------------------|--------------------|-------------------------------|------------------------------|
|                                                 | <u>Cochrane reviews (n=346)</u> | <i>Total high-impact journal SRs (n=215)</i> | <u>J Natl Cancer Inst (n=56)</u> | <u>J Clin Oncol (n=56)</u> | <u>Lancet Oncology (n=53)</u> | <u>The BMJ (n=22)</u> | <u>Lancet (n=14)</u> | <u>JAMA (n=12)</u> | <u>CA Cancer J Clin (n=1)</u> | <u>Cancer Research (n=1)</u> |
| data                                            |                                 |                                              |                                  |                            |                               |                       |                      |                    |                               |                              |
| IPD                                             | 3 (0.9)                         | 67 (31.2)                                    | 17 (30.4)                        | 15 (26.8)                  | 18 (34)                       | 3 (13.6)              | 13 (92.9)            | 1 (8.3)            |                               |                              |
| Both                                            | 12 (3.5)                        | 1 (0.5)                                      |                                  | 1 (1.8)                    |                               |                       |                      |                    |                               |                              |
| <b>Network Meta-Analysis (Number of SR (%))</b> | 2 (0.6)                         | 6 (2.8)                                      | 3 (5.4)                          |                            | 3 (5.7)                       |                       |                      |                    |                               |                              |
| <b>Study type (Number of SR (%))</b>            |                                 |                                              |                                  |                            |                               |                       |                      |                    |                               |                              |
| RCT                                             | 264 (76.3)                      | 75 (34.9)                                    | 15 (26.8)                        | 21 (37.5)                  | 14 (26.4)                     | 7 (31.8)              | 12 (85.7)            | 5 (41.7)           | 1 (100)                       |                              |
| non-RCT                                         | 5 (1.4)                         | 85 (39.5)                                    | 27 (48.2)                        | 16 (28.6)                  | 27 (50.9)                     | 12 (54.5)             | 1 (7.1)              | 2 (16.7)           |                               |                              |
| Both                                            | 77 (22.3)                       | 46 (21.4)                                    | 9 (16.1)                         | 19 (33.9)                  | 9 (17)                        | 3 (13.6)              | 1 (7.1)              | 5 (41.7)           |                               |                              |
| Unclear                                         |                                 | 9 (4.2)                                      | 5 (8.9)                          |                            | 3 (5.7)                       |                       |                      |                    |                               | 1 (100)                      |
| <b>Population (Number of SR (%))</b>            |                                 |                                              |                                  |                            |                               |                       |                      |                    |                               |                              |
| Adult                                           | 318 (9.9)                       | 151 (70.2)                                   | 39 (69.6)                        | 43 (76.8)                  | 32 (60.4)                     | 14 (63.6)             | 13 (92.9)            | 9 (75)             | 1 (100)                       |                              |
| Paediatric                                      | 26 (7.5)                        | 6 (2.8)                                      | 1 (1.8)                          | 1 (1.8)                    | 4 (7.5)                       |                       |                      |                    |                               |                              |
| Both                                            | 2 (0.6)                         | 22 (10.2)                                    | 5 (8.9)                          | 6 (10.7)                   | 7 (13.2)                      | 4 (18.2)              |                      |                    |                               |                              |
| Unclear                                         |                                 | 36 (16.7)                                    | 11 (19.6)                        | 6 (10.7)                   | 10 (18.9)                     | 4 (18.2)              | 1 (7.1)              | 3 (25)             |                               | 1 (100)                      |
| <b>Included studies (Median (IQR))</b>          | 6 (2-13)                        | 18 (10-38,8)                                 | 20 (12-43.8)                     | 16 (9-36.3)                | 24 (12.8-44.8)                | 16 (9.6-26.5)         | 16 (25-9.8)          | 16.5 (10.3-24.8)   | 14                            | 37                           |

|                                                                                                                                                                                                                                                                                                          | <u>Cochrane</u>                 | <u>High-impact journals</u>                  |                                  |                            |                               |                            |                              |                             |                               |                              |
|----------------------------------------------------------------------------------------------------------------------------------------------------------------------------------------------------------------------------------------------------------------------------------------------------------|---------------------------------|----------------------------------------------|----------------------------------|----------------------------|-------------------------------|----------------------------|------------------------------|-----------------------------|-------------------------------|------------------------------|
|                                                                                                                                                                                                                                                                                                          | <u>Cochrane reviews (n=346)</u> | <i>Total high-impact journal SRs (n=215)</i> | <u>J Natl Cancer Inst (n=56)</u> | <u>J Clin Oncol (n=56)</u> | <u>Lancet Oncology (n=53)</u> | <u>The BMJ (n=22)</u>      | <u>Lancet (n=14)</u>         | <u>JAMA (n=12)</u>          | <u>CA Cancer J Clin (n=1)</u> | <u>Cancer Research (n=1)</u> |
| <b>Included patients (Median (IQR))</b>                                                                                                                                                                                                                                                                  | 1020<br>(194.5-2845)            | 7730<br>(3288-29423)                         | 8216<br>(3288-35568)             | 4758,5<br>(184.5-11091.8)  | 4600<br>(3033-21137)          | 117597<br>(10903-890992.3) | 21471.5<br>(13287.5-45195.8) | 12813.5<br>(4075.5-48067.3) | 3377                          | Not reported                 |
| <b>Citations (Median (IQR))</b>                                                                                                                                                                                                                                                                          | 3<br>(1-7)                      | 46<br>(18,5-86,5)                            | 30.5<br>(9.8-55.3)               | 48,5<br>(18-70.3)          | 40<br>(22-97)                 | 40<br>(15-80.3)            | 157<br>(54-351.8)            | 101<br>(45.3-155.8)         | 8                             | 15                           |
| SR= systematic review, IPD= Individual Patient Data, J Natl Cancer Inst= Journal of the National Cancer Institute, J Clin Oncol= Journal of Clinical Oncology, CA Cancer J Clin= A Cancer Journal for Clinicians, Cancer Res= Cancer Research, RCT=randomised controlled trial, IQR= interquartile range |                                 |                                              |                                  |                            |                               |                            |                              |                             |                               |                              |

1  
2  
3  
4  
5  
6  
7  
8  
9  
10  
11  
12  
13  
14  
15  
16  
17  
18  
19  
20  
21  
22  
23  
24  
25  
26  
27  
28  
29  
30  
31  
32  
33  
34  
35  
36  
37  
38  
39  
40  
41  
42  
43  
44  
45  
46  
47  
48  
49  
50  
51  
52  
53  
54  
55  
56  
57  
58  
59  
60

## Appendix

### Appendix table 1: Search strategy for high-impact journals SRs

| Search                                                                                                                                                                                                                                                                                                                                                                                                                                                                                                                                                                                                                                                                                                                                                                     |
|----------------------------------------------------------------------------------------------------------------------------------------------------------------------------------------------------------------------------------------------------------------------------------------------------------------------------------------------------------------------------------------------------------------------------------------------------------------------------------------------------------------------------------------------------------------------------------------------------------------------------------------------------------------------------------------------------------------------------------------------------------------------------|
| <p><b>#1</b> Search (((((((((((("Cancer Research"[Journal]) OR "Ca-A Cancer Journal for Clinicians"[Journal]) OR "Nature reviews. Clinical oncology"[Journal]) OR "Clinical cancer research : an official journal of the American Association for Cancer Research"[Journal]) OR)) OR (((("BMJ (Clinical research ed.)"[Journal]) OR "The Lancet. Oncology"[Journal]) OR "JAMA"[Journal]) OR "The New England journal of medicine"[Journal]) OR "Journal of clinical oncology : official journal of the American Society of Clinical Oncology"[Journal]) OR "Annals of oncology : official journal of the European Society for Medical Oncology / ESMO"[Journal]) OR "Journal of the National Cancer Institute"[Journal]) OR "Lancet (London, England)"[Journal])])))])</p> |
| <p><b>#2</b> Search (((((((((((((((((((((((((((((((((NEOPLASMS BY HISTOLOGIC TYPE[MeSH Terms]) OR NEOPLASMS BY SITE[MeSH Terms]) OR neoplas*) OR tumor*) OR tumour*) OR ((Krebs* or cancer*)) OR malignan*) OR ((carcino* or karzino* or karzinom*)) OR sarcom*) OR (leukem* or leukaem*)) OR lymphom*) OR melano*) OR metastas*) OR ((mesothelio* or mesotelio*)) OR carcinomatos*) OR ((gliom* or glioblastom*)) OR osteo*sarcom*) OR ((blastom* or neuroblastom*))])))])</p>                                                                                                                                                                                                                                                                                            |
| <p><b>#3</b> Search (((((systematic review[Title/Abstract]) OR (((((meta-</p>                                                                                                                                                                                                                                                                                                                                                                                                                                                                                                                                                                                                                                                                                              |

1  
2  
3  
4  
5  
6 analys\*[Title/Abstract] OR metaanalys\*[Title/Abstract])))

7  
8  
9 [#4](#) Search ((#1 and #2 and #3))

10  
11  
12 [#5](#) Search (#1 and #2) Filters: Meta-Analysis; Systematic Reviews

13  
14  
15 [#6](#) Search (#4 or #7) Filters: Publication date from 2011/01/01 to 2016/05/31  
16  
17  
18  
19  
20  
21  
22  
23  
24  
25  
26  
27  
28  
29  
30  
31  
32  
33  
34  
35  
36  
37  
38  
39  
40  
41  
42  
43  
44  
45  
46  
47  
48  
49  
50  
51  
52  
53  
54  
55  
56  
57  
58  
59  
60

For peer review only

Appendix table 2: Extracted items

| Item | Extracted                      | Example                                                                                                                                                                                                                                           |
|------|--------------------------------|---------------------------------------------------------------------------------------------------------------------------------------------------------------------------------------------------------------------------------------------------|
| 1.   | Author                         |                                                                                                                                                                                                                                                   |
| 2.   | Title                          |                                                                                                                                                                                                                                                   |
| 3.   | Journal                        | Cochrane, A Cancer Journal for Clinicians, New England Journal of Medicine, The Lancet, JAMA, Lancet Oncology, Journal of Clinical Oncology, The BMJ, Nature Reviews Clinical Oncology, Journal of the National Cancer Institute, Cancer Research |
| 4.   | Year last updated              | 2011-2016                                                                                                                                                                                                                                         |
| 5.   | Year first published           | 2011-2016                                                                                                                                                                                                                                         |
| 6.   | Cochrane group                 |                                                                                                                                                                                                                                                   |
| 7.   | Region of corresponding author | Africa, Asia, Australia/ New Zealand, Europe, North America, South America                                                                                                                                                                        |
| 8.   | Review type                    | SR based on trial-level data, Individual Patient Data SR, Both                                                                                                                                                                                    |
| 9.   | Network Meta-Analysis          | Yes, No                                                                                                                                                                                                                                           |
| 10.  | Included study type            | RCTs, non-RCTs, Both                                                                                                                                                                                                                              |
| 11.  | Question type                  | Diagnosis, Epidemiology, Prevention, Prognosis, Screening, Therapy                                                                                                                                                                                |

| Item | Extracted                  | Example                                                                                                                                                                                                                                                                                                                                 |
|------|----------------------------|-----------------------------------------------------------------------------------------------------------------------------------------------------------------------------------------------------------------------------------------------------------------------------------------------------------------------------------------|
| 12.  | Disease                    | Bladder, bones (incl. spine), brain (incl. CNS), breast, cancer in general, cervical, colorectal, endometrial, oesophagus, gastric, haematological (leukaemia, lymphoma, myeloma), head and neck, lung, melanoma, mixed (but not general, other (e.g. male breast cancer, liver metastases), ovarian, pancreas, prostate, renal, uterus |
| 13.  | Intervention               | Behavioural (e.g. exercise, diet, smoking), chemotherapy, mixed interventions, "new drug" (targeted therapy and monoclonal antibodies), radiotherapy, supportive, surgery, thermal (e.g. hyperthermia, cryotherapy), not applicable (if diagnostic, prognostic, preventive, epidemiologic, screening)                                   |
| 14.  | Population                 | Adult, paediatric, both                                                                                                                                                                                                                                                                                                                 |
| 15.  | Number of included studies |                                                                                                                                                                                                                                                                                                                                         |



1  
2  
3  
4  
5  
6  
7  
8  
9  
10  
11  
12  
13  
14  
15  
16  
17  
18  
19  
20  
21  
22  
23  
24  
25  
26  
27  
28  
29  
30  
31  
32  
33  
34  
35  
36  
37  
38  
39  
40  
41  
42  
43  
44  
45  
46  
47  
48  
49  
50  
51  
52  
53  
54  
55  
56  
57  
58  
59  
60

| Item | Extracted                | Example |
|------|--------------------------|---------|
| 16.  | Number included patients |         |

For peer review only

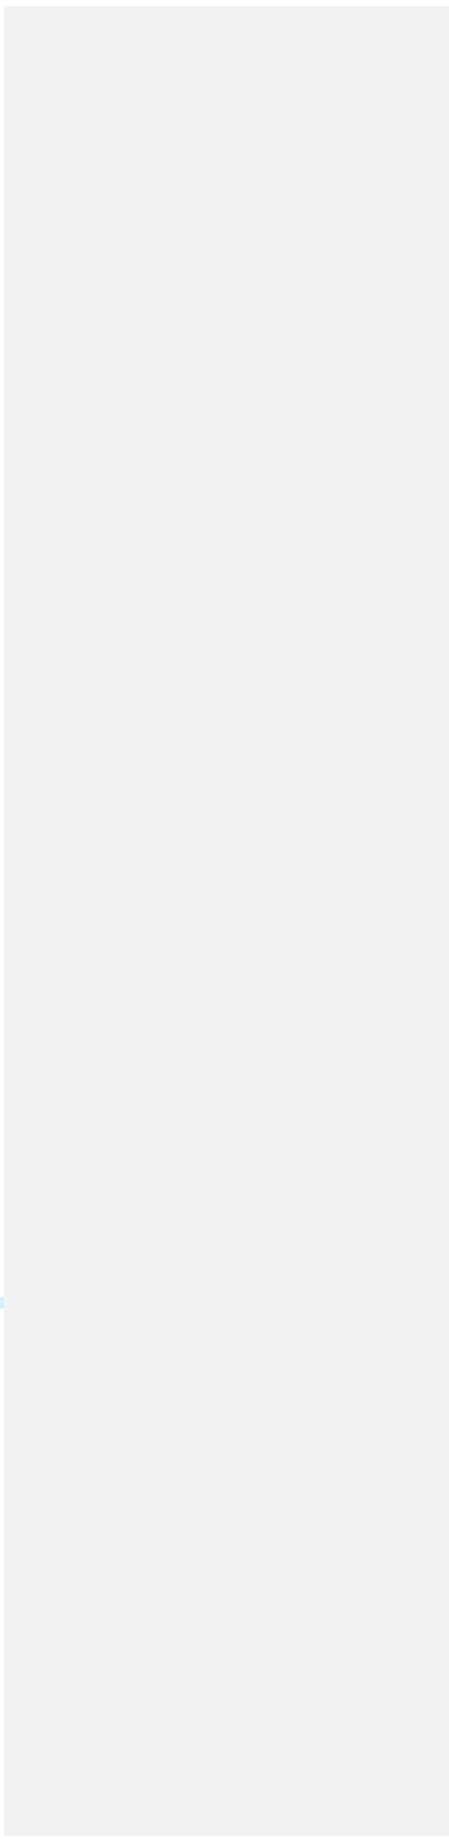

Appendix table 3: Extracted quality indicators

| Item | AMSTAR                                                   | This work                                                                                    |
|------|----------------------------------------------------------|----------------------------------------------------------------------------------------------|
| 1.   | Was an 'a priori' design provided                        | Was the review question established before the conduct of the review?                        |
|      |                                                          | Were the in- and exclusion criteria defined before the conduct of the review?                |
| 2.   | Was there duplicate study selection and data extraction? | Was the study selection and data-extraction undertaken by two independently working authors? |
|      |                                                          | Was the consensus procedure described?                                                       |
|      |                                                          | Was the interobserver-agreement (quantitatively) assessed?                                   |
| 3.   | Was a comprehensive literature search performed?         | Were at least two electronic databases searched?                                             |
|      |                                                          | Were the years included in the searches reported?                                            |
|      |                                                          | Were the database searches supported by other sources?                                       |
| 4.   | Was the status of publication                            | Were reviews irrespective of publication                                                     |

| Item | AMSTAR                                                                                            | This work                                                                                                                      |
|------|---------------------------------------------------------------------------------------------------|--------------------------------------------------------------------------------------------------------------------------------|
|      | (i.e. grey literature) used as an inclusion criterion?                                            | status included?<br>Were reviews in languages other than English included?                                                     |
| 5.   | Was a list of studies (included and excluded) provided?                                           | Was a list of included studies provided?<br>Was a list of excluded studies provided?                                           |
| 6.   | Were the characteristics of the included studies provided?                                        | Were study characteristic of every included study included?                                                                    |
| 7.   | Was the scientific quality of the included studies assessed and documented?                       | Was the quality of included studies included by available tools (e.g. Cochrane's Risk of Bias, ROBINS, Newcastle-Ottawa scale) |
| 8.   | Was the scientific quality of the included studies used appropriately in formulating conclusions? | If a Meta-analysis was performed: Was the study quality included into the analysis via sensitivity- or subgroup analysis?      |
| 9.   | Were the methods used to combine the findings of studies appropriate?                             | Was possible heterogeneity assessed?                                                                                           |

| Item | AMSTAR                                           | This work                                                             |
|------|--------------------------------------------------|-----------------------------------------------------------------------|
| 10.  | Was the likelihood of publication bias assessed? | Was possible publication bias formally assessed?                      |
| 11.  | Was the conflict of interest included?           | Were possible Conflicts of Interest regarding the review disclosed?   |
|      |                                                  | Were possible Conflicts of Interest of the included studies reported? |

## References

### References of assessed reviews

#### *Cochrane reviews*

1. Abdel-Rahman Omar M, Elsayed Z. Yttrium-90 microsphere radioembolisation for unresectable hepatocellular carcinoma. *Cochrane Database of Systematic Reviews* 2016; (2).  
<http://onlinelibrary.wiley.com/doi/10.1002/14651858.CD011313.pub2/abstract>.
2. Abdul Razak Albiruni R, Li L, Bryant A, et al. Chemotherapy for malignant germ cell ovarian cancer in adult patients with early stage, advanced and recurrent disease. *Cochrane Database of Systematic Reviews* 2011; (3).  
<http://onlinelibrary.wiley.com/doi/10.1002/14651858.CD007584.pub2/abstract>.
3. Aghoram R, Cai P, Dickinson James A. Alpha-foetoprotein and/or liver ultrasonography for screening of hepatocellular carcinoma in patients with chronic hepatitis B. *Cochrane Database of Systematic Reviews* 2012; (9).  
<http://onlinelibrary.wiley.com/doi/10.1002/14651858.CD002799.pub2/abstract>.
4. Akl Elie A, Kahale L, Terrenato I, et al. Oral anticoagulation in patients with cancer who have no therapeutic or prophylactic indication for anticoagulation. *Cochrane Database of Systematic Reviews* 2014; (7).  
<http://onlinelibrary.wiley.com/doi/10.1002/14651858.CD006466.pub5/abstract>.
5. Akl Elie A, Kahale Lara A, Ballout Rami A, et al. Parenteral anticoagulation in ambulatory patients with cancer. *Cochrane Database of Systematic Reviews* 2014; (12).  
<http://onlinelibrary.wiley.com/doi/10.1002/14651858.CD006652.pub4/abstract>.

- 1  
2  
3  
4  
5  
6  
7  
8  
9  
10  
11  
12  
13  
14  
15  
16  
17  
18  
19  
20  
21  
22  
23  
24  
25  
26  
27  
28  
29  
30  
31  
32  
33  
34  
35  
36  
37  
38  
39  
40  
41  
42  
43  
44  
45  
46  
47  
48  
49  
50  
51  
52  
53  
54  
55  
56  
57  
58  
59  
60
6. Akl Elie A, Kahale Lara A, Barba M, et al. Anticoagulation for the long-term treatment of venous thromboembolism in patients with cancer. Cochrane Database of Systematic Reviews 2014; (7).  
<http://onlinelibrary.wiley.com/doi/10.1002/14651858.CD006650.pub4/abstract>.
7. Akl Elie A, Kahale Lara A, Neumann I, et al. Anticoagulation for the initial treatment of venous thromboembolism in patients with cancer. Cochrane Database of Systematic Reviews 2014; (6).  
<http://onlinelibrary.wiley.com/doi/10.1002/14651858.CD006649.pub6/abstract>.
8. Akl Elie A, Kahale Lara A, Sperati F, et al. Low molecular weight heparin versus unfractionated heparin for perioperative thromboprophylaxis in patients with cancer. Cochrane Database of Systematic Reviews 2014; (6).  
<http://onlinelibrary.wiley.com/doi/10.1002/14651858.CD009447.pub2/abstract>.
9. Akl Elie A, Ramly Elie P, Kahale Lara A, et al. Anticoagulation for people with cancer and central venous catheters. Cochrane Database of Systematic Reviews 2014; (10).  
<http://onlinelibrary.wiley.com/doi/10.1002/14651858.CD006468.pub5/abstract>.
10. Al Rawahi T, Lopes Alberto D, Bristow Robert E, et al. Surgical cytoreduction for recurrent epithelial ovarian cancer. Cochrane Database of Systematic Reviews 2013; (2).  
<http://onlinelibrary.wiley.com/doi/10.1002/14651858.CD008765.pub3/abstract>.
11. Alazzam Mi, Tidy J, Osborne R, et al. Chemotherapy for resistant or recurrent gestational trophoblastic neoplasia. Cochrane Database of Systematic Reviews 2016; (1).  
<http://onlinelibrary.wiley.com/doi/10.1002/14651858.CD008891.pub3/abstract>.
12. Amarasena Isuru U, Chatterjee S, Walters Julia AE, et al. Platinum versus non-platinum chemotherapy regimens for small cell lung cancer. Cochrane Database of Systematic

1  
2  
3  
4  
5  
6  
7  
8  
9  
10  
11  
12  
13  
14  
15  
16  
17  
18  
19  
20  
21  
22  
23  
24  
25  
26  
27  
28  
29  
30  
31  
32  
33  
34  
35  
36  
37  
38  
39  
40  
41  
42  
43  
44  
45  
46  
47  
48  
49  
50  
51  
52  
53  
54  
55  
56  
57  
58  
59  
60

Reviews 2015; (8).

<http://onlinelibrary.wiley.com/doi/10.1002/14651858.CD006849.pub3/abstract>.

13. Ang C, Bryant A, Barton Desmond PJ, et al. Exenterative surgery for recurrent gynaecological malignancies. Cochrane Database of Systematic Reviews 2014; (2).

<http://onlinelibrary.wiley.com/doi/10.1002/14651858.CD010449.pub2/abstract>.

14. Ang C, Chan Karen KL, Bryant A, et al. Ultra-radical (extensive) surgery versus standard surgery for the primary cytoreduction of advanced epithelial ovarian cancer. Cochrane Database of Systematic Reviews 2011; (4).

<http://onlinelibrary.wiley.com/doi/10.1002/14651858.CD007697.pub2/abstract>.

15. Anglemeyer A, Agrawal Anurag K, Rutherford George W. Treatment of Kaposi sarcoma in children with HIV-1 infection. Cochrane Database of Systematic Reviews 2014; (1).

<http://onlinelibrary.wiley.com/doi/10.1002/14651858.CD009826.pub2/abstract>.

16. Arbyn M, Roelens J, Simoens C, et al. Human papillomavirus testing versus repeat cytology for triage of minor cytological cervical lesions. Cochrane Database of Systematic Reviews 2013; (3).

<http://onlinelibrary.wiley.com/doi/10.1002/14651858.CD008054.pub2/abstract>.

17. Archampong D, Borowski D, Wille-Jørgensen P, et al. Workload and surgeon's specialty for outcome after colorectal cancer surgery. Cochrane Database of Systematic Reviews 2012; (3).

<http://onlinelibrary.wiley.com/doi/10.1002/14651858.CD005391.pub3/abstract>.

18. Arcidiacono Paolo G, Calori G, Carrara S, et al. Celiac plexus block for pancreatic cancer pain in adults. Cochrane Database of Systematic Reviews 2011; (3).

<http://onlinelibrary.wiley.com/doi/10.1002/14651858.CD007519.pub2/abstract>.

- 1  
2  
3  
4  
5  
6  
7  
8  
9  
10  
11  
12  
13  
14  
15  
16  
17  
18  
19  
20  
21  
22  
23  
24  
25  
26  
27  
28  
29  
30  
31  
32  
33  
34  
35  
36  
37  
38  
39  
40  
41  
42  
43  
44  
45  
46  
47  
48  
49  
50  
51  
52  
53  
54  
55  
56  
57  
58  
59  
60
19. Baalbergen A, Veenstra Y, Stalpers L. Primary surgery versus primary radiotherapy with or without chemotherapy for early adenocarcinoma of the uterine cervix. Cochrane Database of Systematic Reviews 2013; (1).  
<http://onlinelibrary.wiley.com/doi/10.1002/14651858.CD006248.pub3/abstract>.
20. Bala Malgorzata M, Riemsma Robert P, Wolff R, et al. Microwave coagulation for liver metastases. Cochrane Database of Systematic Reviews 2013; (10).  
<http://onlinelibrary.wiley.com/doi/10.1002/14651858.CD010163.pub2/abstract>.
21. Bala Malgorzata M, Riemsma Robert P, Wolff R, et al. Cryotherapy for liver metastases. Cochrane Database of Systematic Reviews 2013; (6).  
<http://onlinelibrary.wiley.com/doi/10.1002/14651858.CD009058.pub2/abstract>.
22. Balduzzi S, Mantarro S, Guarneri V, et al. Trastuzumab-containing regimens for metastatic breast cancer. Cochrane Database of Systematic Reviews 2014; (6).  
<http://onlinelibrary.wiley.com/doi/10.1002/14651858.CD006242.pub2/abstract>.
23. Barone Damiano G, Lawrie Theresa A, Hart Michael G. Image guided surgery for the resection of brain tumours. Cochrane Database of Systematic Reviews 2014; (1).  
<http://onlinelibrary.wiley.com/doi/10.1002/14651858.CD009685.pub2/abstract>.
24. Bath-Hextall Fiona J, Matin Rubeta N, Wilkinson D, et al. Interventions for cutaneous Bowen's disease. Cochrane Database of Systematic Reviews 2013; (6).  
<http://onlinelibrary.wiley.com/doi/10.1002/14651858.CD007281.pub2/abstract>.
25. Bauer K, Rancea M, Roloff V, et al. Rituximab, ofatumumab and other monoclonal anti-CD20 antibodies for chronic lymphocytic leukaemia. Cochrane Database of Systematic Reviews 2012; (11).  
<http://onlinelibrary.wiley.com/doi/10.1002/14651858.CD008079.pub2/abstract>.



1  
2  
3  
4  
5  
6  
7  
8  
9  
10  
11  
12  
13  
14  
15  
16  
17  
18  
19  
20  
21  
22  
23  
24  
25  
26  
27  
28  
29  
30  
31  
32  
33  
34  
35  
36  
37  
38  
39  
40  
41  
42  
43  
44  
45  
46  
47  
48  
49  
50  
51  
52  
53  
54  
55  
56  
57  
58  
59  
60

26. Bauer K, Skoetz N, Monsef I, et al. Comparison of first-line chemotherapy including escalated BEACOPP versus chemotherapy including ABVD for people with early unfavourable or advanced stage Hodgkin lymphoma. Cochrane Database of Systematic Reviews 2011; (5).  
<http://onlinelibrary.wiley.com/doi/10.1002/14651858.CD007941.pub3/abstract>.
27. Bell Rae F, Eccleston C, Kalso Eija A. Ketamine as an adjuvant to opioids for cancer pain. Cochrane Database of Systematic Reviews 2012; (6).  
<http://onlinelibrary.wiley.com/doi/10.1002/14651858.CD003351.pub3/abstract>.
28. Bennett C, Green S, DeCaestecker J, et al. Surgery versus radical endotherapies for early cancer and high-grade dysplasia in Barrett's oesophagus. Cochrane Database of Systematic Reviews 2012; (11).  
<http://onlinelibrary.wiley.com/doi/10.1002/14651858.CD007334.pub4/abstract>.
29. Bennett Michael H, Feldmeier J, Smee R, et al. Hyperbaric oxygenation for tumour sensitisation to radiotherapy. Cochrane Database of Systematic Reviews 2012; (4).  
<http://onlinelibrary.wiley.com/doi/10.1002/14651858.CD005007.pub3/abstract>.
30. Bergenthal N, Will A, Streckmann F, et al. Aerobic physical exercise for adult patients with haematological malignancies. Cochrane Database of Systematic Reviews 2014; (11).  
<http://onlinelibrary.wiley.com/doi/10.1002/14651858.CD009075.pub2/abstract>.
31. Bergner N, Monsef I, Illerhaus G, et al. Role of chemotherapy additional to high-dose methotrexate for primary central nervous system lymphoma (PCNSL). Cochrane Database of Systematic Reviews 2012; (11).  
<http://onlinelibrary.wiley.com/doi/10.1002/14651858.CD009355.pub2/abstract>.

- 1  
2  
3  
4  
5  
6  
7  
8  
9  
10  
11  
12  
13  
14  
15  
16  
17  
18  
19  
20  
21  
22  
23  
24  
25  
26  
27  
28  
29  
30  
31  
32  
33  
34  
35  
36  
37  
38  
39  
40  
41  
42  
43  
44  
45  
46  
47  
48  
49  
50  
51  
52  
53  
54  
55  
56  
57  
58  
59  
60
32. Bessell A, Glennly A-M, Furness S, et al. Interventions for the treatment of oral and oropharyngeal cancers: surgical treatment. Cochrane Database of Systematic Reviews 2011; (9).  
<http://onlinelibrary.wiley.com/doi/10.1002/14651858.CD006205.pub3/abstract>.
33. Best Lawrence MJ, Mughal M, Gurusamy Kurinchi S. Laparoscopic versus open gastrectomy for gastric cancer. Cochrane Database of Systematic Reviews 2016; (3).  
<http://onlinelibrary.wiley.com/doi/10.1002/14651858.CD011389.pub2/abstract>.
34. Best Lawrence MJ, Mughal M, Gurusamy Kurinchi S. Non-surgical versus surgical treatment for oesophageal cancer. Cochrane Database of Systematic Reviews 2016; (3). <http://onlinelibrary.wiley.com/doi/10.1002/14651858.CD011498.pub2/abstract>.
35. Billson Hazel A, Holland C, Curwell J, et al. Perioperative nutrition interventions for women with ovarian cancer. Cochrane Database of Systematic Reviews 2013; (9).  
<http://onlinelibrary.wiley.com/doi/10.1002/14651858.CD009884.pub2/abstract>.
36. Bjelakovic G, Gluud Lise L, Nikolova D, et al. Vitamin D supplementation for prevention of cancer in adults. Cochrane Database of Systematic Reviews 2014; (6).  
<http://onlinelibrary.wiley.com/doi/10.1002/14651858.CD007469.pub2/abstract>.
37. Bleeker G, Tytgat Godelieve AM, Adam Judit A, et al. 123I-MIBG scintigraphy and 18F-FDG-PET imaging for diagnosing neuroblastoma. Cochrane Database of Systematic Reviews 2015; (9).  
<http://onlinelibrary.wiley.com/doi/10.1002/14651858.CD009263.pub2/abstract>.
38. Bourke L, Homer Kate E, Thaha Mohamed A, et al. Interventions for promoting habitual exercise in people living with and beyond cancer. Cochrane Database of Systematic Reviews 2013; (9).  
<http://onlinelibrary.wiley.com/doi/10.1002/14651858.CD010192.pub2/abstract>.

1  
2  
3  
4  
5  
6  
7  
8  
9  
10  
11  
12  
13  
14  
15  
16  
17  
18  
19  
20  
21  
22  
23  
24  
25  
26  
27  
28  
29  
30  
31  
32  
33  
34  
35  
36  
37  
38  
39  
40  
41  
42  
43  
44  
45  
46  
47  
48  
49  
50  
51  
52  
53  
54  
55  
56  
57  
58  
59  
60

39. Braam Katja I, van der Torre P, Takken T, et al. Physical exercise training interventions for children and young adults during and after treatment for childhood cancer. Cochrane Database of Systematic Reviews 2016; (3).  
<http://onlinelibrary.wiley.com/doi/10.1002/14651858.CD008796.pub3/abstract>.
40. Bradt J, Shim M, Goodill Sherry W. Dance/movement therapy for improving psychological and physical outcomes in cancer patients. Cochrane Database of Systematic Reviews 2015; (1).  
<http://onlinelibrary.wiley.com/doi/10.1002/14651858.CD007103.pub3/abstract>.
41. Brockbank E, Kokka F, Bryant A, et al. Pre-treatment surgical para-aortic lymph node assessment in locally advanced cervical cancer. Cochrane Database of Systematic Reviews 2013; (3).  
<http://onlinelibrary.wiley.com/doi/10.1002/14651858.CD008217.pub3/abstract>.
42. Brocklehurst P, Kujan O, O'Malley Lucy A, et al. Screening programmes for the early detection and prevention of oral cancer. Cochrane Database of Systematic Reviews 2013; (11).  
<http://onlinelibrary.wiley.com/doi/10.1002/14651858.CD004150.pub4/abstract>.
43. Burdett S, Pignon Jean P, Tierney J, et al. Adjuvant chemotherapy for resected early-stage non-small cell lung cancer. Cochrane Database of Systematic Reviews 2015; (3).  
<http://onlinelibrary.wiley.com/doi/10.1002/14651858.CD011430/abstract>.
44. Cakmakkaya Ozlem S, Kolodzie K, Apfel Christian C, et al. Anaesthetic techniques for risk of malignant tumour recurrence. Cochrane Database of Systematic Reviews 2014; (11).  
<http://onlinelibrary.wiley.com/doi/10.1002/14651858.CD008877.pub2/abstract>.

- 1  
2  
3  
4  
5  
6  
7  
8  
9  
10  
11  
12  
13  
14  
15  
16  
17  
18  
19  
20  
21  
22  
23  
24  
25  
26  
27  
28  
29  
30  
31  
32  
33  
34  
35  
36  
37  
38  
39  
40  
41  
42  
43  
44  
45  
46  
47  
48  
49  
50  
51  
52  
53  
54  
55  
56  
57  
58  
59  
60
45. Candy B, Jones L, Vickerstaff V, et al. Interventions for sexual dysfunction following treatments for cancer in women. Cochrane Database of Systematic Reviews 2016; (2). <http://onlinelibrary.wiley.com/doi/10.1002/14651858.CD005540.pub3/abstract>.
46. Carvalho Alan PV, Vital Flávia MR, Soares Bernardo GO. Exercise interventions for shoulder dysfunction in patients treated for head and neck cancer. Cochrane Database of Systematic Reviews 2012; (4). <http://onlinelibrary.wiley.com/doi/10.1002/14651858.CD008693.pub2/abstract>.
47. Cavalheri V, Tahirah F, Nonoyama Mika L, et al. Exercise training undertaken by people within 12 months of lung resection for non-small cell lung cancer. Cochrane Database of Systematic Reviews 2013; (7). <http://onlinelibrary.wiley.com/doi/10.1002/14651858.CD009955.pub2/abstract>.
48. Chan Benjamin KY, Wiseberg-Firtell Jill A, Jois Ramesh HS, et al. Localization techniques for guided surgical excision of non-palpable breast lesions. Cochrane Database of Systematic Reviews 2015; (12). <http://onlinelibrary.wiley.com/doi/10.1002/14651858.CD009206.pub2/abstract>.
49. Chan Kelvin KW, Glenny A-M, Weldon Jo C, et al. Interventions for the treatment of oral and oropharyngeal cancers: targeted therapy and immunotherapy. Cochrane Database of Systematic Reviews 2015; (12). <http://onlinelibrary.wiley.com/doi/10.1002/14651858.CD010341.pub2/abstract>.
50. Charoenkwan K, Kietpeerakool C. Retroperitoneal drainage versus no drainage after pelvic lymphadenectomy for the prevention of lymphocyst formation in women with gynaecological malignancies. Cochrane Database of Systematic Reviews 2016; (6). <http://onlinelibrary.wiley.com/doi/10.1002/14651858.CD007387.pub4/abstract>.

1  
2  
3  
4  
5  
6  
7  
8  
9  
10  
11  
12  
13  
14  
15  
16  
17  
18  
19  
20  
21  
22  
23  
24  
25  
26  
27  
28  
29  
30  
31  
32  
33  
34  
35  
36  
37  
38  
39  
40  
41  
42  
43  
44  
45  
46  
47  
48  
49  
50  
51  
52  
53  
54  
55  
56  
57  
58  
59  
60

51. Chen H, Li J, Cui T, et al. Adjuvant gonadotropin-releasing hormone analogues for the prevention of chemotherapy induced premature ovarian failure in premenopausal women. Cochrane Database of Systematic Reviews 2011; (11).  
<http://onlinelibrary.wiley.com/doi/10.1002/14651858.CD008018.pub2/abstract>.
52. Chen X, Deng L, Jiang X, et al. Chinese herbal medicine for oesophageal cancer. Cochrane Database of Systematic Reviews 2016; (1).  
<http://onlinelibrary.wiley.com/doi/10.1002/14651858.CD004520.pub7/abstract>.
53. Cheuk Daniel KL, Chiang Alan KS, Chan Godfrey CF, et al. Urate oxidase for the prevention and treatment of tumour lysis syndrome in children with cancer. Cochrane Database of Systematic Reviews 2014; (3).  
<http://onlinelibrary.wiley.com/doi/10.1002/14651858.CD006945.pub4/abstract>.
54. Cheuk Daniel KL, Chiang Alan KS, Lee Tsz L, et al. Vaccines for prophylaxis of viral infections in patients with hematological malignancies. Cochrane Database of Systematic Reviews 2011; (3).  
<http://onlinelibrary.wiley.com/doi/10.1002/14651858.CD006505.pub2/abstract>.
55. Cirocchi R, Trastulli S, Abraha I, et al. Non-resection versus resection for an asymptomatic primary tumour in patients with unresectable Stage IV colorectal cancer. Cochrane Database of Systematic Reviews 2012; (8).  
<http://onlinelibrary.wiley.com/doi/10.1002/14651858.CD008997.pub2/abstract>.
56. Cirocchi R, Trastulli S, Boselli C, et al. Radiofrequency ablation in the treatment of liver metastases from colorectal cancer. Cochrane Database of Systematic Reviews 2012; (6). <http://onlinelibrary.wiley.com/doi/10.1002/14651858.CD006317.pub3/abstract>.
57. Clarke T, Galaal K, Bryant A, et al. Evaluation of follow-up strategies for patients with epithelial ovarian cancer following completion of primary treatment. Cochrane

Database of Systematic Reviews 2014; (9).

<http://onlinelibrary.wiley.com/doi/10.1002/14651858.CD006119.pub3/abstract>.

58. Cortés-Jofré M, Rueda J-R, Corsini-Muñoz G, et al. Drugs for preventing lung cancer in healthy people. Cochrane Database of Systematic Reviews 2012; (10).

<http://onlinelibrary.wiley.com/doi/10.1002/14651858.CD002141.pub2/abstract>.

59. Cousins Sarah E, Tempest E, Feuer David J. Surgery for the resolution of symptoms in malignant bowel obstruction in advanced gynaecological and gastrointestinal cancer. Cochrane Database of Systematic Reviews 2016; (1).

<http://onlinelibrary.wiley.com/doi/10.1002/14651858.CD002764.pub2/abstract>.

60. Coyne I, O'Mathúna Dónal P, Gibson F, et al. Interventions for promoting participation in shared decision-making for children with cancer. Cochrane Database of Systematic Reviews 2016; (11).

<http://onlinelibrary.wiley.com/doi/10.1002/14651858.CD008970.pub3/abstract>.

61. Cramp F, Byron-Daniel J. Exercise for the management of cancer-related fatigue in adults. Cochrane Database of Systematic Reviews 2012; (11).

<http://onlinelibrary.wiley.com/doi/10.1002/14651858.CD006145.pub3/abstract>.

62. Crighton Gemma L, Estcourt Lise J, Wood Erica M, et al. A therapeutic-only versus prophylactic platelet transfusion strategy for preventing bleeding in patients with haematological disorders after myelosuppressive chemotherapy or stem cell transplantation. Cochrane Database of Systematic Reviews 2015; (9).

<http://onlinelibrary.wiley.com/doi/10.1002/14651858.CD010981.pub2/abstract>.

63. Daly T, Hickey Brigid E, Lehman M, et al. Adjuvant radiotherapy following radical prostatectomy for prostate cancer. Cochrane Database of Systematic Reviews 2011;

- 1  
2  
3  
4  
5  
6 (12).  
7  
8 <http://onlinelibrary.wiley.com/doi/10.1002/14651858.CD007234.pub2/abstract>.  
9
- 10 64. Day J, Yust-Katz S, Cachia D, et al. Interventions for the management of fatigue in adults  
11 with a primary brain tumour. Cochrane Database of Systematic Reviews 2016; (4).  
12  
13 <http://onlinelibrary.wiley.com/doi/10.1002/14651858.CD011376.pub2/abstract>.  
14  
15
- 16 65. Day J, Zienius K, Gehring K, et al. Interventions for preventing and ameliorating cognitive  
17 deficits in adults treated with cranial irradiation. Cochrane Database of Systematic  
18 Reviews 2014; (12).  
19  
20 <http://onlinelibrary.wiley.com/doi/10.1002/14651858.CD011335.pub2/abstract>.  
21  
22  
23
- 24 66. de Boer Angela GEM, Taskila Tyna K, Tamminga Sietske J, et al. Interventions to enhance  
25 return-to-work for cancer patients. Cochrane Database of Systematic Reviews 2015;  
26 (9). <http://onlinelibrary.wiley.com/doi/10.1002/14651858.CD007569.pub3/abstract>.  
27  
28  
29
- 30 67. De Caluwé L, Van Nieuwenhove Y, Ceelen Wim P. Preoperative chemoradiation versus  
31 radiation alone for stage II and III resectable rectal cancer. Cochrane Database of  
32 Systematic Reviews 2013; (2).  
33  
34 <http://onlinelibrary.wiley.com/doi/10.1002/14651858.CD006041.pub3/abstract>.  
35  
36  
37
- 38 68. de Castria Tiago B, da Silva Edina MK, Gois Aecio FT, et al. Cisplatin versus carboplatin in  
39 combination with third-generation drugs for advanced non-small cell lung cancer.  
40 Cochrane Database of Systematic Reviews 2013; (8).  
41  
42 <http://onlinelibrary.wiley.com/doi/10.1002/14651858.CD009256.pub2/abstract>.  
43  
44  
45
- 46 69. de Zwart V, Gouw Samantha C, Meyer-Wentrup Friederike AG. Antibody therapies for  
47 lymphoma in children. Cochrane Database of Systematic Reviews 2016; (1).  
48  
49 <http://onlinelibrary.wiley.com/doi/10.1002/14651858.CD011181.pub2/abstract>.  
50  
51  
52  
53  
54  
55  
56  
57  
58  
59  
60

- 1  
2  
3  
4  
5  
6  
7  
8  
9  
10  
11  
12  
13  
14  
15  
16  
17  
18  
19  
20  
21  
22  
23  
24  
25  
26  
27  
28  
29  
30  
31  
32  
33  
34  
35  
36  
37  
38  
39  
40  
41  
42  
43  
44  
45  
46  
47  
48  
49  
50  
51  
52  
53  
54  
55  
56  
57  
58  
59  
60
70. Dear Rachel F, McGeechan K, Jenkins Marisa C, et al. Combination versus sequential single agent chemotherapy for metastatic breast cancer. Cochrane Database of Systematic Reviews 2013; (12).  
<http://onlinelibrary.wiley.com/doi/10.1002/14651858.CD008792.pub2/abstract>.
71. Deng L, Zhang J, Wu T, et al. Combination chemotherapy for primary treatment of high-risk gestational trophoblastic tumour. Cochrane Database of Systematic Reviews 2013; (1).  
<http://onlinelibrary.wiley.com/doi/10.1002/14651858.CD005196.pub4/abstract>.
72. Deva S, Jameson M. Histamine type 2 receptor antagonists as adjuvant treatment for resected colorectal cancer. Cochrane Database of Systematic Reviews 2012; (8).  
<http://onlinelibrary.wiley.com/doi/10.1002/14651858.CD007814.pub2/abstract>.
73. Diaz-Nieto R, Orti-Rodríguez R, Winslet M. Post-surgical chemotherapy versus surgery alone for resectable gastric cancer. Cochrane Database of Systematic Reviews 2013; (9). <http://onlinelibrary.wiley.com/doi/10.1002/14651858.CD008415.pub2/abstract>.
74. Dominick S, Hickey M, Chin J, et al. Levonorgestrel intrauterine system for endometrial protection in women with breast cancer on adjuvant tamoxifen. Cochrane Database of Systematic Reviews 2015; (12).  
<http://onlinelibrary.wiley.com/doi/10.1002/14651858.CD007245.pub3/abstract>.
75. Dong Z, Xu J, Wang Z, et al. Stents for the prevention of pancreatic fistula following pancreaticoduodenectomy. Cochrane Database of Systematic Reviews 2016; (5).  
<http://onlinelibrary.wiley.com/doi/10.1002/14651858.CD008914.pub3/abstract>.
76. D'Souza N, Darmanin G, Fedorowicz Z. Immediate versus delayed reconstruction following surgery for breast cancer. Cochrane Database of Systematic Reviews 2011; (7). <http://onlinelibrary.wiley.com/doi/10.1002/14651858.CD008674.pub2/abstract>.



1  
2  
3  
4  
5  
6  
7  
8  
9  
10  
11  
12  
13  
14  
15  
16  
17  
18  
19  
20  
21  
22  
23  
24  
25  
26  
27  
28  
29  
30  
31  
32  
33  
34  
35  
36  
37  
38  
39  
40  
41  
42  
43  
44  
45  
46  
47  
48  
49  
50  
51  
52  
53  
54  
55  
56  
57  
58  
59  
60

77. Edey Katharine A, Allan E, Murdoch John B, et al. Interventions for the treatment of Paget's disease of the vulva. Cochrane Database of Systematic Reviews 2013; (10). <http://onlinelibrary.wiley.com/doi/10.1002/14651858.CD009245.pub2/abstract>.
78. Elattar A, Bryant A, Winter-Roach Brett A, et al. Optimal primary surgical treatment for advanced epithelial ovarian cancer. Cochrane Database of Systematic Reviews 2011; (8). <http://onlinelibrary.wiley.com/doi/10.1002/14651858.CD007565.pub2/abstract>.
79. Eleje George U, Eke Ahizechukwu C, Igberase Gabriel O, et al. Palliative interventions for controlling vaginal bleeding in advanced cervical cancer. Cochrane Database of Systematic Reviews 2015; (5). <http://onlinelibrary.wiley.com/doi/10.1002/14651858.CD011000.pub2/abstract>.
80. Eliakim-Raz N, Vinograd I, Zalmanovici Trestioreanu A, et al. Influenza vaccines in immunosuppressed adults with cancer. Cochrane Database of Systematic Reviews 2013; (10). <http://onlinelibrary.wiley.com/doi/10.1002/14651858.CD008983.pub2/abstract>.
81. Eliyas S, Al-Khayatt A, Porter Richard WJ, et al. Dental extractions prior to radiotherapy to the jaws for reducing post-radiotherapy dental complications. Cochrane Database of Systematic Reviews 2013; (2). <http://onlinelibrary.wiley.com/doi/10.1002/14651858.CD008857.pub2/abstract>.
82. Estcourt L, Stanworth S, Doree C, et al. Prophylactic platelet transfusion for prevention of bleeding in patients with haematological disorders after chemotherapy and stem cell transplantation. Cochrane Database of Systematic Reviews 2012; (5). <http://onlinelibrary.wiley.com/doi/10.1002/14651858.CD004269.pub3/abstract>.
83. Estcourt Lise J, Stanworth S, Doree C, et al. Different doses of prophylactic platelet transfusion for preventing bleeding in people with haematological disorders after

1  
2  
3  
4  
5  
6 myelosuppressive chemotherapy or stem cell transplantation. Cochrane Database of  
7  
8 Systematic Reviews 2015; (10).

9  
10 <http://onlinelibrary.wiley.com/doi/10.1002/14651858.CD010984.pub2/abstract>.

11  
12 84. Estcourt Lise J, Stanworth Simon J, Doree C, et al. Granulocyte transfusions for  
13  
14 preventing infections in people with neutropenia or neutrophil dysfunction.

15  
16 Cochrane Database of Systematic Reviews 2015; (6).

17  
18 <http://onlinelibrary.wiley.com/doi/10.1002/14651858.CD005341.pub3/abstract>.

19  
20 85. Everett T, Bryant A, Griffin Michelle F, et al. Interventions targeted at women to  
21  
22 encourage the uptake of cervical screening. Cochrane Database of Systematic  
23  
24 Reviews 2011; (5).

25  
26 <http://onlinelibrary.wiley.com/doi/10.1002/14651858.CD002834.pub2/abstract>.

27  
28 86. Ezzo J, Manheimer E, McNeely Margaret L, et al. Manual lymphatic drainage for  
29  
30 lymphedema following breast cancer treatment. Cochrane Database of Systematic  
31  
32 Reviews 2015; (5).

33  
34 <http://onlinelibrary.wiley.com/doi/10.1002/14651858.CD003475.pub2/abstract>.

35  
36 87. Farquhar C, Marjoribanks J, Lethaby A, et al. High-dose chemotherapy and autologous  
37  
38 bone marrow or stem cell transplantation versus conventional chemotherapy for  
39  
40 women with early poor prognosis breast cancer. Cochrane Database of Systematic  
41  
42 Reviews 2016; (5).

43  
44 <http://onlinelibrary.wiley.com/doi/10.1002/14651858.CD003139.pub3/abstract>.

45  
46 88. Felbel S, Meerpohl Joerg J, Monsef I, et al. Yoga in addition to standard care for patients  
47  
48 with haematological malignancies. Cochrane Database of Systematic Reviews 2014;  
49  
50 (6). <http://onlinelibrary.wiley.com/doi/10.1002/14651858.CD010146.pub2/abstract>.

- 1  
2  
3  
4  
5  
6 89. Ford Alexander C, Forman D, Hunt R, et al. Helicobacter pylori eradication for the  
7  
8 prevention of gastric neoplasia. Cochrane Database of Systematic Reviews 2015; (7).  
9  
10 <http://onlinelibrary.wiley.com/doi/10.1002/14651858.CD005583.pub2/abstract>.  
11  
12 90. Frost Jonathan A, Webster Katie E, Bryant A, et al. Lymphadenectomy for the  
13  
14 management of endometrial cancer. Cochrane Database of Systematic Reviews 2015;  
15  
16 (9). <http://onlinelibrary.wiley.com/doi/10.1002/14651858.CD007585.pub3/abstract>.  
17  
18 91. Fu J, Fang F, Xie L, et al. Prophylactic chemotherapy for hydatidiform mole to prevent  
19  
20 gestational trophoblastic neoplasia. Cochrane Database of Systematic Reviews 2012;  
21  
22 (10).  
23  
24 <http://onlinelibrary.wiley.com/doi/10.1002/14651858.CD007289.pub2/abstract>.  
25  
26 92. Furness S, Glenny A-M, Worthington Helen V, et al. Interventions for the treatment of  
27  
28 oral cavity and oropharyngeal cancer: chemotherapy. Cochrane Database of  
29  
30 Systematic Reviews 2011; (4).  
31  
32 <http://onlinelibrary.wiley.com/doi/10.1002/14651858.CD006386.pub3/abstract>.  
33  
34 93. Gafter-Gvili A, Fraser A, Paul M, et al. Antibiotic prophylaxis for bacterial infections in  
35  
36 afebrile neutropenic patients following chemotherapy. Cochrane Database of  
37  
38 Systematic Reviews 2012; (1).  
39  
40 <http://onlinelibrary.wiley.com/doi/10.1002/14651858.CD004386.pub3/abstract>.  
41  
42 94. Gaitskell K, Martinek I, Bryant A, et al. Angiogenesis inhibitors for the treatment of  
43  
44 ovarian cancer. Cochrane Database of Systematic Reviews 2011; (9).  
45  
46 <http://onlinelibrary.wiley.com/doi/10.1002/14651858.CD007930.pub2/abstract>.  
47  
48 95. Galaal K, Al Moundhri M, Bryant A, et al. Adjuvant chemotherapy for advanced  
49  
50 endometrial cancer. Cochrane Database of Systematic Reviews 2014; (5).  
51  
52 <http://onlinelibrary.wiley.com/doi/10.1002/14651858.CD010681.pub2/abstract>.  
53  
54  
55  
56  
57  
58  
59  
60

- 1  
2  
3  
4  
5  
6  
7  
8  
9  
10  
11  
12  
13  
14  
15  
16  
17  
18  
19  
20  
21  
22  
23  
24  
25  
26  
27  
28  
29  
30  
31  
32  
33  
34  
35  
36  
37  
38  
39  
40  
41  
42  
43  
44  
45  
46  
47  
48  
49  
50  
51  
52  
53  
54  
55  
56  
57  
58  
59  
60
96. Galaal K, Bryant A, Deane Katherine HO, et al. Interventions for reducing anxiety in women undergoing colposcopy. Cochrane Database of Systematic Reviews 2011; (12).  
<http://onlinelibrary.wiley.com/doi/10.1002/14651858.CD006013.pub3/abstract>.
97. Galaal K, Bryant A, Fisher Ann D, et al. Laparoscopy versus laparotomy for the management of early stage endometrial cancer. Cochrane Database of Systematic Reviews 2012; (9).  
<http://onlinelibrary.wiley.com/doi/10.1002/14651858.CD006655.pub2/abstract>.
98. Galaal K, van der Heijden E, Godfrey K, et al. Adjuvant radiotherapy and/or chemotherapy after surgery for uterine carcinosarcoma. Cochrane Database of Systematic Reviews 2013; (2).  
<http://onlinelibrary.wiley.com/doi/10.1002/14651858.CD006812.pub3/abstract>.
99. Galway K, Black A, Cantwell M, et al. Psychosocial interventions to improve quality of life and emotional wellbeing for recently diagnosed cancer patients. Cochrane Database of Systematic Reviews 2012; (11).  
<http://onlinelibrary.wiley.com/doi/10.1002/14651858.CD007064.pub2/abstract>.
100. Gartlehner G, Thaler K, Chapman A, et al. Mammography in combination with breast ultrasonography versus mammography for breast cancer screening in women at average risk. Cochrane Database of Systematic Reviews 2013; (4).  
<http://onlinelibrary.wiley.com/doi/10.1002/14651858.CD009632.pub2/abstract>.
101. Gbabe Oluwatoyin F, Okwundu Charles I, Dediccoat M, et al. Treatment of severe or progressive Kaposi's sarcoma in HIV-infected adults. Cochrane Database of Systematic Reviews 2014; (9).  
<http://onlinelibrary.wiley.com/doi/10.1002/14651858.CD003256.pub2/abstract>.

- 1  
2  
3  
4  
5  
6  
7 102. George R, Jeba J, Ramkumar G, et al. Interventions for the treatment of metastatic  
8  
9 extradural spinal cord compression in adults. Cochrane Database of Systematic  
10  
11 Reviews 2015; (9).  
12 <http://onlinelibrary.wiley.com/doi/10.1002/14651858.CD006716.pub3/abstract>.  
13
- 14 103. Ghersi D, Willson Melina L, Chan Matthew Ming K, et al. Taxane-containing regimens for  
15  
16 metastatic breast cancer. Cochrane Database of Systematic Reviews 2015; (6).  
17  
18 <http://onlinelibrary.wiley.com/doi/10.1002/14651858.CD003366.pub3/abstract>.  
19
- 20 104. Goodwin A, Parker S, Ghersi D, et al. Post-operative radiotherapy for ductal carcinoma  
21  
22 in situ of the breast. Cochrane Database of Systematic Reviews 2013; (11).  
23  
24 <http://onlinelibrary.wiley.com/doi/10.1002/14651858.CD000563.pub7/abstract>.  
25
- 26 105. Goossen Ginette M, Kremer Leontien CM, van de Wetering Marianne D. Influenza  
27  
28 vaccination in children being treated with chemotherapy for cancer. Cochrane  
29  
30 Database of Systematic Reviews 2013; (8).  
31  
32 <http://onlinelibrary.wiley.com/doi/10.1002/14651858.CD006484.pub3/abstract>.  
33
- 34 106. Gordijn Maartje S, Rensen N, Gemke Reinoud JBJ, et al. Hypothalamic-pituitary-adrenal  
35  
36 (HPA) axis suppression after treatment with glucocorticoid therapy for childhood  
37  
38 acute lymphoblastic leukaemia. Cochrane Database of Systematic Reviews 2015; (8).  
39  
40 <http://onlinelibrary.wiley.com/doi/10.1002/14651858.CD008727.pub3/abstract>.  
41
- 42 107. Gøtzsche Peter C, Johansen Helle K. Routine versus selective antifungal administration  
43  
44 for control of fungal infections in patients with cancer. Cochrane Database of  
45  
46 Systematic Reviews 2014; (9).  
47  
48 <http://onlinelibrary.wiley.com/doi/10.1002/14651858.CD000026.pub2/abstract>.  
49  
50  
51  
52  
53  
54  
55  
56  
57  
58  
59  
60

- 1  
2  
3  
4  
5  
6  
7 108. Gøtzsche Peter C, Jørgensen Karsten J. Screening for breast cancer with mammography.  
8  
9 Cochrane Database of Systematic Reviews 2013; (6).  
10  
11 <http://onlinelibrary.wiley.com/doi/10.1002/14651858.CD001877.pub5/abstract>.  
12  
13 109. Grabosch Shannon M, Shariff Osman M, Wulff Judith L, et al. Non-steroidal anti-  
14  
15 inflammatory agents to induce regression and prevent the progression of cervical  
16  
17 intraepithelial neoplasia. Cochrane Database of Systematic Reviews 2014; (4).  
18  
19 <http://onlinelibrary.wiley.com/doi/10.1002/14651858.CD004121.pub3/abstract>.  
20  
21 110. Grande Antonio J, Silva V, Riera R, et al. Exercise for cancer cachexia in adults. Cochrane  
22  
23 Database of Systematic Reviews 2014; (11).  
24  
25 <http://onlinelibrary.wiley.com/doi/10.1002/14651858.CD010804.pub2/abstract>.  
26  
27 111. Gupta Aditya K, Paquet M, Villanueva E, et al. Interventions for actinic keratoses.  
28  
29 Cochrane Database of Systematic Reviews 2012; (12).  
30  
31 <http://onlinelibrary.wiley.com/doi/10.1002/14651858.CD004415.pub2/abstract>.  
32  
33 112. Gurion R, Belnik-Plitman Y, Gafter-Gvili A, et al. Colony-stimulating factors for  
34  
35 prevention and treatment of infectious complications in patients with acute  
36  
37 myelogenous leukemia. Cochrane Database of Systematic Reviews 2012; (6).  
38  
39 <http://onlinelibrary.wiley.com/doi/10.1002/14651858.CD008238.pub3/abstract>.  
40  
41 113. Gurumurthy M, Bryant A, Shanbhag S. Effectiveness of different treatment modalities  
42  
43 for the management of adult-onset granulosa cell tumours of the ovary (primary and  
44  
45 recurrent). Cochrane Database of Systematic Reviews 2014; (4).  
46  
47 <http://onlinelibrary.wiley.com/doi/10.1002/14651858.CD006912.pub2/abstract>.  
48  
49 114. Gurusamy Kurinchi S, Kumar S, Davidson Brian R. Prophylactic gastrojejunostomy for  
50  
51 unresectable periampullary carcinoma. Cochrane Database of Systematic Reviews  
52  
53  
54  
55  
56  
57  
58  
59  
60

2013; (2).

<http://onlinelibrary.wiley.com/doi/10.1002/14651858.CD008533.pub3/abstract>.

115. Gurusamy Kurinchi S, Kumar S, Davidson Brian R, et al. Resection versus other treatments for locally advanced pancreatic cancer. Cochrane Database of Systematic Reviews 2014; (2).

<http://onlinelibrary.wiley.com/doi/10.1002/14651858.CD010244.pub2/abstract>.

116. Gurusamy Kurinchi S, Pallari E, Midya S, et al. Laparoscopic versus open transhiatal oesophagectomy for oesophageal cancer. Cochrane Database of Systematic Reviews 2016; (3).

<http://onlinelibrary.wiley.com/doi/10.1002/14651858.CD011390.pub2/abstract>.

117. Hadley G, Derry S, Moore RA, et al. Transdermal fentanyl for cancer pain. Cochrane Database of Systematic Reviews 2013; (10).

<http://onlinelibrary.wiley.com/doi/10.1002/14651858.CD010270.pub2/abstract>.

118. Haldar K, Gaitskell K, Bryant A, et al. Epidermal growth factor receptor blockers for the treatment of ovarian cancer. Cochrane Database of Systematic Reviews 2011; (10).

<http://onlinelibrary.wiley.com/doi/10.1002/14651858.CD007927.pub3/abstract>.

119. Hart Michael G, Garside R, Rogers G, et al. Chemotherapy wafers for high grade glioma. Cochrane Database of Systematic Reviews 2011; (3).

<http://onlinelibrary.wiley.com/doi/10.1002/14651858.CD007294.pub2/abstract>.

120. Hart Michael G, Garside R, Rogers G, et al. Temozolomide for high grade glioma. Cochrane Database of Systematic Reviews 2013; (4).

<http://onlinelibrary.wiley.com/doi/10.1002/14651858.CD007415.pub2/abstract>.

121. Hartmann T, Hübel K, Monsef I, et al. Additional plerixafor to granulocyte colony-stimulating factors for haematopoietic stem cell mobilisation for autologous

**Formatted:** English (U.S.), Do not check spelling or grammar

**Formatted:** English (U.S.), Do not check spelling or grammar

- 1  
2  
3  
4  
5  
6 transplantation in people with malignant lymphoma or multiple myeloma. Cochrane  
7 Database of Systematic Reviews 2015; (10).  
8  
9 <http://onlinelibrary.wiley.com/doi/10.1002/14651858.CD010615.pub2/abstract>.
- 10  
11  
12 122. Helm CW, Lorenz Douglas J, Meyer Nicholas J, et al. Retinoids for preventing the  
13 progression of cervical intra-epithelial neoplasia. Cochrane Database of Systematic  
14 Reviews 2013; (6).  
15  
16 <http://onlinelibrary.wiley.com/doi/10.1002/14651858.CD003296.pub3/abstract>.
- 17  
18  
19 123. Henschke N, Maher Christopher G, Ostelo Raymond WJG, et al. Red flags to screen for  
20 malignancy in patients with low-back pain. Cochrane Database of Systematic Reviews  
21 2013; (2).  
22  
23 <http://onlinelibrary.wiley.com/doi/10.1002/14651858.CD008686.pub2/abstract>.
- 24  
25  
26 124. Henson Caroline C, Burden S, Davidson Susan E, et al. Nutritional interventions for  
27 reducing gastrointestinal toxicity in adults undergoing radical pelvic radiotherapy.  
28 Cochrane Database of Systematic Reviews 2013; (11).  
29  
30 <http://onlinelibrary.wiley.com/doi/10.1002/14651858.CD009896.pub2/abstract>.
- 31  
32  
33 125. Herbst C, Monsef I, Specht L, et al. Chemotherapy alone versus chemotherapy plus  
34 radiotherapy for adults with early stage Hodgkin lymphoma. Cochrane Database of  
35 Systematic Reviews 2011; (4).  
36  
37 <http://onlinelibrary.wiley.com/doi/10.1002/14651858.CD007110.pub3/abstract>.
- 38  
39  
40 126. Hickey Brigid E, Francis Daniel P, Lehman M. Sequencing of chemotherapy and  
41 radiotherapy for early breast cancer. Cochrane Database of Systematic Reviews 2013;  
42 (4). <http://onlinelibrary.wiley.com/doi/10.1002/14651858.CD005212.pub3/abstract>.
- 43  
44  
45  
46  
47  
48  
49  
50  
51  
52  
53  
54  
55  
56  
57  
58  
59  
60



- 1  
2  
3  
4  
5  
6  
7 127. Hilgart Jennifer S, Coles B, Iredale R. Cancer genetic risk assessment for individuals at  
8 risk of familial breast cancer. Cochrane Database of Systematic Reviews 2012; (2).  
9  
10 <http://onlinelibrary.wiley.com/doi/10.1002/14651858.CD003721.pub3/abstract>.  
11  
12 128. Holme Ø, Bretthauer M, Fretheim A, et al. Flexible sigmoidoscopy versus faecal occult  
13 blood testing for colorectal cancer screening in asymptomatic individuals. Cochrane  
14 Database of Systematic Reviews 2013; (9).  
15  
16 <http://onlinelibrary.wiley.com/doi/10.1002/14651858.CD009259.pub2/abstract>.  
17  
18 129. Holtick U, Albrecht M, Chemnitz Jens M, et al. Bone marrow versus peripheral blood  
19 allogeneic haematopoietic stem cell transplantation for haematological malignancies  
20 in adults. Cochrane Database of Systematic Reviews 2014; (4).  
21  
22 <http://onlinelibrary.wiley.com/doi/10.1002/14651858.CD010189.pub2/abstract>.  
23  
24 130. Hurlow A, Bennett Michael I, Robb Karen A, et al. Transcutaneous electric nerve  
25 stimulation (TENS) for cancer pain in adults. Cochrane Database of Systematic  
26 Reviews 2012; (3).  
27  
28 <http://onlinelibrary.wiley.com/doi/10.1002/14651858.CD006276.pub3/abstract>.  
29  
30 131. Hüttner Felix J, Fitzmaurice C, Schwarzer G, et al. Pylorus-preserving  
31 pancreaticoduodenectomy (pp Whipple) versus pancreaticoduodenectomy (classic  
32 Whipple) for surgical treatment of periampullary and pancreatic carcinoma.  
33  
34 Cochrane Database of Systematic Reviews 2016; (2).  
35  
36 <http://onlinelibrary.wiley.com/doi/10.1002/14651858.CD006053.pub6/abstract>.  
37  
38 132. Hutzschenreuter F, Monsef I, Kreuzer K-A, et al. Granulocyte and granulocyte-  
39 macrophage colony stimulating factors for newly diagnosed patients with  
40 myelodysplastic syndromes. Cochrane Database of Systematic Reviews 2016; (2).  
41  
42 <http://onlinelibrary.wiley.com/doi/10.1002/14651858.CD009310.pub2/abstract>.  
43  
44  
45  
46  
47  
48  
49  
50  
51  
52  
53  
54  
55  
56  
57  
58  
59  
60

- 1  
2  
3  
4  
5  
6  
7 133. Ilic D, Forbes Kristian M, Hased C. Lycopene for the prevention of prostate cancer.  
8  
9 Cochrane Database of Systematic Reviews 2011; (11).  
10  
11 <http://onlinelibrary.wiley.com/doi/10.1002/14651858.CD008007.pub2/abstract>.  
12  
13 134. Ilic D, Misso Marie L. Screening for testicular cancer. Cochrane Database of Systematic  
14  
15 Reviews 2011; (2).  
16  
17 <http://onlinelibrary.wiley.com/doi/10.1002/14651858.CD007853.pub2/abstract>.  
18  
19 135. Ilic D, Neuberger Molly M, Djulbegovic M, et al. Screening for prostate cancer. Cochrane  
20  
21 Database of Systematic Reviews 2013; (1).  
22  
23 <http://onlinelibrary.wiley.com/doi/10.1002/14651858.CD004720.pub3/abstract>.  
24  
25 136. Itchaki G, Gafter-Gvili A, Lahav M, et al. Anthracycline-containing regimens for  
26  
27 treatment of follicular lymphoma in adults. Cochrane Database of Systematic  
28  
29 Reviews 2013; (7).  
30  
31 <http://onlinelibrary.wiley.com/doi/10.1002/14651858.CD008909.pub2/abstract>.  
32  
33 137. Jaaback K, Johnson N, Lawrie Theresa A. Intraperitoneal chemotherapy for the initial  
34  
35 management of primary epithelial ovarian cancer. Cochrane Database of Systematic  
36  
37 Reviews 2016; (1).  
38  
39 <http://onlinelibrary.wiley.com/doi/10.1002/14651858.CD005340.pub4/abstract>.  
40  
41 138. Jassim Ghufuran A, Whitford David L, Hickey A, et al. Psychological interventions for  
42  
43 women with non-metastatic breast cancer. Cochrane Database of Systematic  
44  
45 Reviews 2015; (5).  
46  
47 <http://onlinelibrary.wiley.com/doi/10.1002/14651858.CD008729.pub2/abstract>.  
48  
49 139. Jin H, Leng Q, Li C. Dietary flavonoid for preventing colorectal neoplasms. Cochrane  
50  
51 Database of Systematic Reviews 2012; (8).  
52  
53 <http://onlinelibrary.wiley.com/doi/10.1002/14651858.CD009350.pub2/abstract>.  
54  
55  
56  
57  
58  
59  
60

- 1  
2  
3  
4  
5  
6 140. Jin X, Ruiz Beguerie J, Sze Daniel M-y, et al. Ganoderma lucidum (Reishi mushroom) for  
7  
8 cancer treatment. Cochrane Database of Systematic Reviews 2016; (4).  
9  
10 <http://onlinelibrary.wiley.com/doi/10.1002/14651858.CD007731.pub3/abstract>.  
11  
12 141. Johansen Helle K, Gøtzsche Peter C. Amphotericin B versus fluconazole for controlling  
13  
14 fungal infections in neutropenic cancer patients. Cochrane Database of Systematic  
15  
16 Reviews 2014; (9).  
17  
18 <http://onlinelibrary.wiley.com/doi/10.1002/14651858.CD000239.pub2/abstract>.  
19  
20 142. Johansen Helle K, Gøtzsche Peter C. Amphotericin B lipid soluble formulations versus  
21  
22 amphotericin B in cancer patients with neutropenia. Cochrane Database of  
23  
24 Systematic Reviews 2014; (9).  
25  
26 <http://onlinelibrary.wiley.com/doi/10.1002/14651858.CD000969.pub2/abstract>.  
27  
28 143. Johnson N, Bryant A, Miles T, et al. Adjuvant chemotherapy for endometrial cancer  
29  
30 after hysterectomy. Cochrane Database of Systematic Reviews 2011; (10).  
31  
32 <http://onlinelibrary.wiley.com/doi/10.1002/14651858.CD003175.pub2/abstract>.  
33  
34 144. Jones Daniel J, Bunn F, Bell-Syer Sophie V. Prophylactic antibiotics to prevent surgical  
35  
36 site infection after breast cancer surgery. Cochrane Database of Systematic Reviews  
37  
38 2014; (3).  
39  
40 <http://onlinelibrary.wiley.com/doi/10.1002/14651858.CD005360.pub4/abstract>.  
41  
42 145. Jones G, Cleves A, Wilt Timothy J, et al. Intravesical gemcitabine for non-muscle invasive  
43  
44 bladder cancer. Cochrane Database of Systematic Reviews 2012; (1).  
45  
46 <http://onlinelibrary.wiley.com/doi/10.1002/14651858.CD009294.pub2/abstract>.  
47  
48 146. Jørgensen Karsten J, Gøtzsche Peter C, Dalbøge Christina S, et al. Voriconazole versus  
49  
50 amphotericin B or fluconazole in cancer patients with neutropenia. Cochrane  
51  
52  
53  
54  
55  
56  
57  
58  
59  
60

- 1  
2  
3  
4  
5  
6 Database of Systematic Reviews 2014; (2).  
7  
8 <http://onlinelibrary.wiley.com/doi/10.1002/14651858.CD004707.pub3/abstract>.  
9
- 10 147. Kaushik S, Pepas L, Nordin A, et al. Surgical interventions for high-grade vulval  
11 intraepithelial neoplasia. Cochrane Database of Systematic Reviews 2014; (3).  
12  
13 <http://onlinelibrary.wiley.com/doi/10.1002/14651858.CD007928.pub3/abstract>.  
14  
15
- 16 148. Kerrigan S, Grant R. Antiepileptic drugs for treating seizures in adults with brain  
17 tumours. Cochrane Database of Systematic Reviews 2011; (8).  
18  
19 <http://onlinelibrary.wiley.com/doi/10.1002/14651858.CD008586.pub2/abstract>.  
20  
21
- 22 149. Khan F, Amatya B, Ng L, et al. Multidisciplinary rehabilitation for follow-up of women  
23 treated for breast cancer. Cochrane Database of Systematic Reviews 2012; (12).  
24  
25 <http://onlinelibrary.wiley.com/doi/10.1002/14651858.CD009553.pub2/abstract>.  
26  
27
- 28 150. Khan F, Amatya B, Ng L, et al. Multidisciplinary rehabilitation after primary brain tumour  
29 treatment. Cochrane Database of Systematic Reviews 2015; (8).  
30  
31 <http://onlinelibrary.wiley.com/doi/10.1002/14651858.CD009509.pub3/abstract>.  
32  
33
- 34 151. Kharfan-Dabaja M, Mhaskar R, Reljic T, et al. Mycophenolate mofetil versus  
35 methotrexate for prevention of graft-versus-host disease in people receiving  
36 allogeneic hematopoietic stem cell transplantation. Cochrane Database of Systematic  
37  
38 Reviews 2014; (7).  
39  
40 <http://onlinelibrary.wiley.com/doi/10.1002/14651858.CD010280.pub2/abstract>.  
41  
42  
43
- 44 152. Khasraw M, Ameratunga Malaka S, Grant R, et al. Antiangiogenic therapy for high-grade  
45 glioma. Cochrane Database of Systematic Reviews 2014; (9).  
46  
47 <http://onlinelibrary.wiley.com/doi/10.1002/14651858.CD008218.pub3/abstract>.  
48  
49  
50  
51  
52  
53  
54  
55  
56  
57  
58  
59  
60

1  
2  
3  
4  
5  
6  
7  
8  
9  
10  
11  
12  
13  
14  
15  
16  
17  
18  
19  
20  
21  
22  
23  
24  
25  
26  
27  
28  
29  
30  
31  
32  
33  
34  
35  
36  
37  
38  
39  
40  
41  
42  
43  
44  
45  
46  
47  
48  
49  
50  
51  
52  
53  
54  
55  
56  
57  
58  
59  
60

153. Kidane B, Coughlin S, Vogt K, et al. Preoperative chemotherapy for resectable thoracic esophageal cancer. Cochrane Database of Systematic Reviews 2015; (5).  
<http://onlinelibrary.wiley.com/doi/10.1002/14651858.CD001556.pub3/abstract>.
154. Kietpeerakool C, Supoken A, Laopaiboon M, et al. Effectiveness of tranexamic acid in reducing blood loss during cytoreductive surgery for advanced ovarian cancer. Cochrane Database of Systematic Reviews 2016; (1).  
<http://onlinelibrary.wiley.com/doi/10.1002/14651858.CD011732.pub2/abstract>.
155. Knijnenburg Sebastiaan L, Mulder Renée L, Schouten-Van Meeteren Antoinette YN, et al. Early and late renal adverse effects after potentially nephrotoxic treatment for childhood cancer. Cochrane Database of Systematic Reviews 2013; (10).  
<http://onlinelibrary.wiley.com/doi/10.1002/14651858.CD008944.pub2/abstract>.
156. Kokka F, Bryant A, Brockbank E, et al. Surgical treatment of stage IA2 cervical cancer. Cochrane Database of Systematic Reviews 2014; (5).  
<http://onlinelibrary.wiley.com/doi/10.1002/14651858.CD010870.pub2/abstract>.
157. Kokka F, Bryant A, Brockbank E, et al. Hysterectomy with radiotherapy or chemotherapy or both for women with locally advanced cervical cancer. Cochrane Database of Systematic Reviews 2015; (4).  
<http://onlinelibrary.wiley.com/doi/10.1002/14651858.CD010260.pub2/abstract>.
158. Kong A, Johnson N, Kitchener Henry C, et al. Adjuvant radiotherapy for stage I endometrial cancer. Cochrane Database of Systematic Reviews 2012; (4).  
<http://onlinelibrary.wiley.com/doi/10.1002/14651858.CD003916.pub4/abstract>.
159. Kucukmetin A, Biliatis I, Naik R, et al. Laparoscopically assisted radical vaginal hysterectomy versus radical abdominal hysterectomy for the treatment of early

1  
2  
3  
4  
5  
6 cervical cancer. Cochrane Database of Systematic Reviews 2013; (10).

7  
8 <http://onlinelibrary.wiley.com/doi/10.1002/14651858.CD006651.pub3/abstract>.

9  
10 160. Kunath F, Grobe Henrik R, Rücker G, et al. Non-steroidal antiandrogen monotherapy  
11 compared with luteinising hormone-releasing hormone agonists or surgical  
12 castration monotherapy for advanced prostate cancer. Cochrane Database of  
13 Systematic Reviews 2014; (6).

14  
15  
16 <http://onlinelibrary.wiley.com/doi/10.1002/14651858.CD009266.pub2/abstract>.

17  
18 161. Kyrgidis A, Tzellos T, Mocellin S, et al. Sentinel lymph node biopsy followed by lymph  
19 node dissection for localised primary cutaneous melanoma. Cochrane Database of  
20 Systematic Reviews 2015; (5).

21  
22 <http://onlinelibrary.wiley.com/doi/10.1002/14651858.CD010307.pub2/abstract>.

23  
24 162. Kyrgiou M, Mitra A, Arbyn M, et al. Fertility and early pregnancy outcomes after  
25 conservative treatment for cervical intraepithelial neoplasia. Cochrane Database of  
26 Systematic Reviews 2015; (9).

27  
28 <http://onlinelibrary.wiley.com/doi/10.1002/14651858.CD008478.pub2/abstract>.

29  
30 163. Lanceley A, Fiander A, McCormack M, et al. Follow-up protocols for women with  
31 cervical cancer after primary treatment. Cochrane Database of Systematic Reviews  
32 2013; (11).

33  
34 <http://onlinelibrary.wiley.com/doi/10.1002/14651858.CD008767.pub2/abstract>.

35  
36 164. Lawal Aramide O, Musekiwa A, Grobler L. Interferon after surgery for women with  
37 advanced (Stage II-IV) epithelial ovarian cancer. Cochrane Database of Systematic  
38 Reviews 2013; (6).

39  
40  
41 <http://onlinelibrary.wiley.com/doi/10.1002/14651858.CD009620.pub2/abstract>.

- 1  
2  
3  
4  
5  
6  
7 165. Lawrie Theresa A, Bryant A, Cameron A, et al. Pegylated liposomal doxorubicin for  
8 relapsed epithelial ovarian cancer. Cochrane Database of Systematic Reviews 2013;  
9  
10 (7). <http://onlinelibrary.wiley.com/doi/10.1002/14651858.CD006910.pub2/abstract>.  
11  
12 166. Lawrie Theresa A, Nordin A, Chakrabarti M, et al. Medical and surgical interventions for  
13 the treatment of usual-type vulval intraepithelial neoplasia. Cochrane Database of  
14 Systematic Reviews 2016; (1).  
15  
16 <http://onlinelibrary.wiley.com/doi/10.1002/14651858.CD011837.pub2/abstract>.  
17  
18 167. Lawrie Theresa A, Patel A, Martin-Hirsch Pierre PL, et al. Sentinel node assessment for  
19 diagnosis of groin lymph node involvement in vulval cancer. Cochrane Database of  
20 Systematic Reviews 2014; (6).  
21  
22 <http://onlinelibrary.wiley.com/doi/10.1002/14651858.CD010409.pub2/abstract>.  
23  
24 168. Lawrie Theresa A, Rabbie R, Thoma C, et al. Pegylated liposomal doxorubicin for first-  
25 line treatment of epithelial ovarian cancer. Cochrane Database of Systematic Reviews  
26 2013; (10).  
27  
28 <http://onlinelibrary.wiley.com/doi/10.1002/14651858.CD010482.pub2/abstract>.  
29  
30 169. Lawrie Theresa A, Winter-Roach Brett A, Heus P, et al. Adjuvant (post-surgery)  
31 chemotherapy for early stage epithelial ovarian cancer. Cochrane Database of  
32 Systematic Reviews 2015; (12).  
33  
34 <http://onlinelibrary.wiley.com/doi/10.1002/14651858.CD004706.pub5/abstract>.  
35  
36 170. Lecavalier-Barsoum M, Quon H, Abdulkarim B. Adjuvant treatment of anaplastic  
37 oligodendrogliomas and oligoastrocytomas. Cochrane Database of Systematic  
38 Reviews 2014; (5).  
39  
40 <http://onlinelibrary.wiley.com/doi/10.1002/14651858.CD007104.pub2/abstract>.  
41  
42  
43  
44  
45  
46  
47  
48  
49  
50  
51  
52  
53  
54  
55  
56  
57  
58  
59  
60

- 1  
2  
3  
4  
5  
6  
7 171. Lee Siew H, Grant R, Kennedy C, et al. Positioning and spinal bracing for pain relief in  
8 metastatic spinal cord compression in adults. Cochrane Database of Systematic  
9 Reviews 2015; (9).  
10 <http://onlinelibrary.wiley.com/doi/10.1002/14651858.CD007609.pub3/abstract>.  
11  
12  
13  
14 172. Leffers N, Daemen T, Helfrich W, et al. Antigen-specific active immunotherapy for  
15 ovarian cancer. Cochrane Database of Systematic Reviews 2014; (9).  
16 <http://onlinelibrary.wiley.com/doi/10.1002/14651858.CD007287.pub3/abstract>.  
17  
18  
19  
20 173. Li X, Xu S, Tan Y, et al. The effects of idarubicin versus other anthracyclines for induction  
21 therapy of patients with newly diagnosed leukaemia. Cochrane Database of  
22 Systematic Reviews 2015; (6).  
23 <http://onlinelibrary.wiley.com/doi/10.1002/14651858.CD010432.pub2/abstract>.  
24  
25  
26  
27  
28 174. Liu R, Wang X, Tian Jin H, et al. High dose rate versus low dose rate intracavity  
29 brachytherapy for locally advanced uterine cervix cancer. Cochrane Database of  
30 Systematic Reviews 2014; (10).  
31 <http://onlinelibrary.wiley.com/doi/10.1002/14651858.CD007563.pub3/abstract>.  
32  
33  
34  
35  
36 175. Loeffen Erik AH, te Poele Esther M, Tissing Wim JE, et al. Very early discharge versus  
37 early discharge versus non-early discharge in children with cancer and febrile  
38 neutropenia. Cochrane Database of Systematic Reviews 2016; (2).  
39 <http://onlinelibrary.wiley.com/doi/10.1002/14651858.CD008382.pub2/abstract>.  
40  
41  
42  
43  
44 176. Lu D, Wang X, Shi G. Perioperative enhanced recovery programmes for gynaecological  
45 cancer patients. Cochrane Database of Systematic Reviews 2015; (3).  
46 <http://onlinelibrary.wiley.com/doi/10.1002/14651858.CD008239.pub4/abstract>.  
47  
48  
49  
50  
51  
52  
53  
54  
55  
56  
57  
58  
59  
60



1  
2  
3  
4  
5  
6  
7  
8  
9  
10  
11  
12  
13  
14  
15  
16  
17  
18  
19  
20  
21  
22  
23  
24  
25  
26  
27  
28  
29  
30  
31  
32  
33  
34  
35  
36  
37  
38  
39  
40  
41  
42  
43  
44  
45  
46  
47  
48  
49  
50  
51  
52  
53  
54  
55  
56  
57  
58  
59  
60

177. Macaya A, Muñoz-Santos C, Balaguer A, et al. Interventions for anal canal intraepithelial neoplasia. Cochrane Database of Systematic Reviews 2012; (12).  
<http://onlinelibrary.wiley.com/doi/10.1002/14651858.CD009244.pub2/abstract>.
178. Macey R, Walsh T, Brocklehurst P, et al. Diagnostic tests for oral cancer and potentially malignant disorders in patients presenting with clinically evident lesions. Cochrane Database of Systematic Reviews 2015; (5).  
<http://onlinelibrary.wiley.com/doi/10.1002/14651858.CD010276.pub2/abstract>.
179. Manser R, Lethaby A, Irving Louis B, et al. Screening for lung cancer. Cochrane Database of Systematic Reviews 2013; (6).  
<http://onlinelibrary.wiley.com/doi/10.1002/14651858.CD001991.pub3/abstract>.
180. Mao C, Fu X-H, Yuan J-Q, et al. Interleukin-2 as maintenance therapy for children and adults with acute myeloid leukaemia in first complete remission. Cochrane Database of Systematic Reviews 2015; (11).  
<http://onlinelibrary.wiley.com/doi/10.1002/14651858.CD010248.pub2/abstract>.
181. Mao C, Yang Z-Y, He B-F, et al. Toremifene versus tamoxifen for advanced breast cancer. Cochrane Database of Systematic Reviews 2012; (7).  
<http://onlinelibrary.wiley.com/doi/10.1002/14651858.CD008926.pub2/abstract>.
182. Martí-Carvajal Arturo J, Anand V, Solà I. Treatment for disseminated intravascular coagulation in patients with acute and chronic leukemia. Cochrane Database of Systematic Reviews 2015; (6).  
<http://onlinelibrary.wiley.com/doi/10.1002/14651858.CD008562.pub3/abstract>.
183. Martin-Hirsch Pierre PL, Bryant A. Interventions for preventing blood loss during the treatment of cervical intraepithelial neoplasia. Cochrane Database of Systematic

1  
2  
3  
4  
5  
6  
7  
8  
9  
10  
11  
12  
13  
14  
15  
16  
17  
18  
19  
20  
21  
22  
23  
24  
25  
26  
27  
28  
29  
30  
31  
32  
33  
34  
35  
36  
37  
38  
39  
40  
41  
42  
43  
44  
45  
46  
47  
48  
49  
50  
51  
52  
53  
54  
55  
56  
57  
58  
59  
60

Reviews 2013; (12).

<http://onlinelibrary.wiley.com/doi/10.1002/14651858.CD001421.pub3/abstract>.

184. Martin-Hirsch Pierre PL, Bryant A, Keep Sarah L, et al. Adjuvant progestagens for endometrial cancer. Cochrane Database of Systematic Reviews 2011; (6).

<http://onlinelibrary.wiley.com/doi/10.1002/14651858.CD001040.pub2/abstract>.

185. Martin-Hirsch Pierre PL, Paraskeva E, Bryant A, et al. Surgery for cervical intraepithelial neoplasia. Cochrane Database of Systematic Reviews 2013; (12).

<http://onlinelibrary.wiley.com/doi/10.1002/14651858.CD001318.pub3/abstract>.

186. Masterson L, Moualed D, Masood A, et al. De-escalation treatment protocols for human papillomavirus-associated oropharyngeal squamous cell carcinoma. Cochrane Database of Systematic Reviews 2014; (2).

<http://onlinelibrary.wiley.com/doi/10.1002/14651858.CD010271.pub2/abstract>.

187. McCarthy K, Pearson K, Fulton R, et al. Pre-operative chemoradiation for non-metastatic locally advanced rectal cancer. Cochrane Database of Systematic Reviews 2012; (12).

<http://onlinelibrary.wiley.com/doi/10.1002/14651858.CD008368.pub2/abstract>.

188. Mei L, Chen H, Wei Dong M, et al. Maintenance chemotherapy for ovarian cancer. Cochrane Database of Systematic Reviews 2013; (6).

<http://onlinelibrary.wiley.com/doi/10.1002/14651858.CD007414.pub3/abstract>.

189. Mhaskar R, Clark Otavio Augusto C, Lyman G, et al. Colony-stimulating factors for chemotherapy-induced febrile neutropenia. Cochrane Database of Systematic Reviews 2014; (10).

<http://onlinelibrary.wiley.com/doi/10.1002/14651858.CD003039.pub2/abstract>.

- 1  
2  
3  
4  
5  
6 190. Mhaskar R, Redzepovic J, Wheatley K, et al. Bisphosphonates in multiple myeloma: a  
7  
8 network meta-analysis. Cochrane Database of Systematic Reviews 2012; (5).  
9  
10 <http://onlinelibrary.wiley.com/doi/10.1002/14651858.CD003188.pub3/abstract>.  
11  
12 191. Mhaskar R, Wao H, Miladinovic B, et al. The role of iron in the management of  
13  
14 chemotherapy-induced anemia in cancer patients receiving erythropoiesis-  
15  
16 stimulating agents. Cochrane Database of Systematic Reviews 2016; (2).  
17  
18 <http://onlinelibrary.wiley.com/doi/10.1002/14651858.CD009624.pub2/abstract>.  
19  
20 192. Mical P, Borok S, Vidal L, et al. Empirical antibiotics targeting gram-positive bacteria for  
21  
22 the treatment of febrile neutropenic patients with cancer. Cochrane Database of  
23  
24 Systematic Reviews 2014; (6).  
25  
26 <http://onlinelibrary.wiley.com/doi/10.1002/14651858.CD003914.pub4/abstract>.  
27  
28 193. Michiels Erna MC, Schouten-Van Meeteren Antoinette YN, Doz F, et al. Chemotherapy  
29  
30 for children with medulloblastoma. Cochrane Database of Systematic Reviews 2015;  
31  
32 (1). <http://onlinelibrary.wiley.com/doi/10.1002/14651858.CD006678.pub2/abstract>.  
33  
34 194. Milazzo S, Horneber M. Laetrile treatment for cancer. Cochrane Database of Systematic  
35  
36 Reviews 2015; (4).  
37  
38 <http://onlinelibrary.wiley.com/doi/10.1002/14651858.CD005476.pub4/abstract>.  
39  
40 195. Miles T, Johnson N. Vaginal dilator therapy for women receiving pelvic radiotherapy.  
41  
42 Cochrane Database of Systematic Reviews 2014; (9).  
43  
44 <http://onlinelibrary.wiley.com/doi/10.1002/14651858.CD007291.pub3/abstract>.  
45  
46 196. Mishra Shiraz I, Scherer Roberta W, Geigle Paula M, et al. Exercise interventions on  
47  
48 health-related quality of life for cancer survivors. Cochrane Database of Systematic  
49  
50 Reviews 2012; (8).  
51  
52 <http://onlinelibrary.wiley.com/doi/10.1002/14651858.CD007566.pub2/abstract>.  
53  
54  
55  
56  
57  
58  
59  
60

- 1  
2  
3  
4  
5  
6 197. Mishra Shiraz I, Scherer Roberta W, Snyder C, et al. Exercise interventions on health-  
7  
8 related quality of life for people with cancer during active treatment. Cochrane  
9  
10 Database of Systematic Reviews 2012; (8).  
11  
12 <http://onlinelibrary.wiley.com/doi/10.1002/14651858.CD008465.pub2/abstract>.  
13
- 14 198. Mocellin S, Lens Marko B, Pasquali S, et al. Interferon alpha for the adjuvant treatment  
15  
16 of cutaneous melanoma. Cochrane Database of Systematic Reviews 2013; (6).  
17  
18 <http://onlinelibrary.wiley.com/doi/10.1002/14651858.CD008955.pub2/abstract>.  
19
- 20 199. Mocellin S, McCulloch P, Kazi H, et al. Extent of lymph node dissection for  
21  
22 adenocarcinoma of the stomach. Cochrane Database of Systematic Reviews 2015;  
23  
24 (8). <http://onlinelibrary.wiley.com/doi/10.1002/14651858.CD001964.pub4/abstract>.  
25
- 26 200. Mocellin S, Pasquali S. Diagnostic accuracy of endoscopic ultrasonography (EUS) for the  
27  
28 preoperative locoregional staging of primary gastric cancer. Cochrane Database of  
29  
30 Systematic Reviews 2015; (2).  
31  
32 <http://onlinelibrary.wiley.com/doi/10.1002/14651858.CD009944.pub2/abstract>.  
33
- 34 201. Moja L, Tagliabue L, Balduzzi S, et al. Trastuzumab containing regimens for early breast  
35  
36 cancer. Cochrane Database of Systematic Reviews 2012; (4).  
37  
38 <http://onlinelibrary.wiley.com/doi/10.1002/14651858.CD006243.pub2/abstract>.  
39
- 40 202. Molassiotis A, Bailey C, Caress A, et al. Interventions for cough in cancer. Cochrane  
41  
42 Database of Systematic Reviews 2015; (5).  
43  
44 <http://onlinelibrary.wiley.com/doi/10.1002/14651858.CD007881.pub3/abstract>.  
45
- 46 203. Moore Philippa M, Rivera Mercado S, Grez Artigues M, et al. Communication skills  
47  
48 training for healthcare professionals working with people who have cancer. Cochrane  
49  
50 Database of Systematic Reviews 2013; (3).  
51  
52 <http://onlinelibrary.wiley.com/doi/10.1002/14651858.CD003751.pub3/abstract>.  
53  
54

- 1  
2  
3  
4  
5  
6 204. Morrison J, Haldar K, Kehoe S, et al. Chemotherapy versus surgery for initial treatment  
7  
8 in advanced ovarian epithelial cancer. Cochrane Database of Systematic Reviews  
9  
10 2012; (8).  
11  
12 <http://onlinelibrary.wiley.com/doi/10.1002/14651858.CD005343.pub3/abstract>.  
13
- 14 205. Moschetti I, Cinquini M, Lambertini M, et al. Follow-up strategies for women treated for  
15  
16 early breast cancer. Cochrane Database of Systematic Reviews 2016; (5).  
17  
18 <http://onlinelibrary.wiley.com/doi/10.1002/14651858.CD001768.pub3/abstract>.  
19
- 20 206. Muchtar E, Vidal L, Ram R, et al. The role of maintenance therapy in acute  
21  
22 promyelocytic leukemia in the first complete remission. Cochrane Database of  
23  
24 Systematic Reviews 2013; (3).  
25  
26 <http://onlinelibrary.wiley.com/doi/10.1002/14651858.CD009594.pub2/abstract>.  
27
- 28 207. Mulder Renée L, Paulides M, Langer T, et al. Cyclophosphamide versus ifosfamide for  
29  
30 paediatric and young adult bone and soft tissue sarcoma patients. Cochrane  
31  
32 Database of Systematic Reviews 2015; (9).  
33  
34 <http://onlinelibrary.wiley.com/doi/10.1002/14651858.CD006300.pub4/abstract>.  
35
- 36 208. Mulder Renée L, van Dalen Elvira C, Van den Hof M, et al. Hepatic late adverse effects  
37  
38 after antineoplastic treatment for childhood cancer. Cochrane Database of  
39  
40 Systematic Reviews 2011; (7).  
41  
42 <http://onlinelibrary.wiley.com/doi/10.1002/14651858.CD008205.pub2/abstract>.  
43
- 44 209. Mustafa M, Carson-Stevens A, Gillespie D, et al. Psychological interventions for women  
45  
46 with metastatic breast cancer. Cochrane Database of Systematic Reviews 2013; (6).  
47  
48 <http://onlinelibrary.wiley.com/doi/10.1002/14651858.CD004253.pub4/abstract>.  
49
- 50 210. Nagorni A, Bjelakovic G, Petrovic B. Narrow band imaging versus conventional white  
51  
52 light colonoscopy for the detection of colorectal polyps. Cochrane Database of  
53  
54

1  
2  
3  
4  
5  
6  
7  
8  
9  
10  
11  
12  
13  
14  
15  
16  
17  
18  
19  
20  
21  
22  
23  
24  
25  
26  
27  
28  
29  
30  
31  
32  
33  
34  
35  
36  
37  
38  
39  
40  
41  
42  
43  
44  
45  
46  
47  
48  
49  
50  
51  
52  
53  
54  
55  
56  
57  
58  
59  
60

Systematic Reviews 2012; (1).

<http://onlinelibrary.wiley.com/doi/10.1002/14651858.CD008361.pub2/abstract>.

211. Nama V, Nordin A, Bryant A. Patient-reported outcome measures for follow-up after gynaecological cancer treatment. Cochrane Database of Systematic Reviews 2013; (11).

<http://onlinelibrary.wiley.com/doi/10.1002/14651858.CD010299.pub2/abstract>.

212. Narayanan K, Hadid Omar H, Barnes Eric A. Mohs micrographic surgery versus surgical excision for periocular basal cell carcinoma. Cochrane Database of Systematic Reviews 2014; (12).

<http://onlinelibrary.wiley.com/doi/10.1002/14651858.CD007041.pub4/abstract>.

213. Naumann-Winter F, Greb A, Borchmann P, et al. First-line tandem high-dose chemotherapy and autologous stem cell transplantation versus single high-dose chemotherapy and autologous stem cell transplantation in multiple myeloma, a systematic review of controlled studies. Cochrane Database of Systematic Reviews 2012; (10).

<http://onlinelibrary.wiley.com/doi/10.1002/14651858.CD004626.pub3/abstract>.

214. Nicholson Brian D, Shinkins B, Pathiraja I, et al. Blood CEA levels for detecting recurrent colorectal cancer. Cochrane Database of Systematic Reviews 2015; (12).

<http://onlinelibrary.wiley.com/doi/10.1002/14651858.CD011134.pub2/abstract>.

215. Nugent B, Lewis S, O'Sullivan Joe M. Enteral feeding methods for nutritional management in patients with head and neck cancers being treated with radiotherapy and/or chemotherapy. Cochrane Database of Systematic Reviews 2013; (1).

<http://onlinelibrary.wiley.com/doi/10.1002/14651858.CD007904.pub3/abstract>.

1  
2  
3  
4  
5  
6  
7  
8  
9  
10  
11  
12  
13  
14  
15  
16  
17  
18  
19  
20  
21  
22  
23  
24  
25  
26  
27  
28  
29  
30  
31  
32  
33  
34  
35  
36  
37  
38  
39  
40  
41  
42  
43  
44  
45  
46  
47  
48  
49  
50  
51  
52  
53  
54  
55  
56  
57  
58  
59  
60

216. O'Connor A, McNamara D, O'Moráin Colm A. Surveillance of gastric intestinal metaplasia for the prevention of gastric cancer. Cochrane Database of Systematic Reviews 2013; (9).  
<http://onlinelibrary.wiley.com/doi/10.1002/14651858.CD009322.pub2/abstract>.
217. Okebe Joseph U, Skoetz N, Meremikwu Martin M, et al. Therapeutic interventions for Burkitt lymphoma in children. Cochrane Database of Systematic Reviews 2011; (7).  
<http://onlinelibrary.wiley.com/doi/10.1002/14651858.CD005198.pub3/abstract>.
218. Oliveri Roberto S, Wetterslev J, Gluud C. Transarterial (chemo)embolisation for unresectable hepatocellular carcinoma. Cochrane Database of Systematic Reviews 2011; (3).  
<http://onlinelibrary.wiley.com/doi/10.1002/14651858.CD004787.pub2/abstract>.
219. Ostuzzi G, Matcham F, Dauchy S, et al. Antidepressants for the treatment of depression in people with cancer. Cochrane Database of Systematic Reviews 2015; (6).  
<http://onlinelibrary.wiley.com/doi/10.1002/14651858.CD011006.pub2/abstract>.
220. Pachler J, Wille-Jørgensen P. Quality of life after rectal resection for cancer, with or without permanent colostomy. Cochrane Database of Systematic Reviews 2012; (12).  
<http://onlinelibrary.wiley.com/doi/10.1002/14651858.CD004323.pub4/abstract>.
221. Paley Carole A, Johnson Mark I, Tashani Osama A, et al. Acupuncture for cancer pain in adults. Cochrane Database of Systematic Reviews 2015; (10).  
<http://onlinelibrary.wiley.com/doi/10.1002/14651858.CD007753.pub3/abstract>.
222. Parahoo K, McDonough S, McCaughan E, et al. Psychosocial interventions for men with prostate cancer. Cochrane Database of Systematic Reviews 2013; (12).  
<http://onlinelibrary.wiley.com/doi/10.1002/14651858.CD008529.pub3/abstract>.

- 1  
2  
3  
4  
5  
6 223. Patil Chirag G, Pricola K, Sarmiento JM, et al. Whole brain radiation therapy (WBRT)  
7  
8 alone versus WBRT and radiosurgery for the treatment of brain metastases.  
9  
10 Cochrane Database of Systematic Reviews 2012; (9).  
11  
12 <http://onlinelibrary.wiley.com/doi/10.1002/14651858.CD006121.pub3/abstract>.  
13
- 14 224. Paul M, Dickstein Y, Schlesinger A, et al. Beta-lactam versus beta-lactam-aminoglycoside  
15  
16 combination therapy in cancer patients with neutropenia. Cochrane Database of  
17  
18 Systematic Reviews 2013; (6).  
19  
20 <http://onlinelibrary.wiley.com/doi/10.1002/14651858.CD003038.pub2/abstract>.  
21
- 22 225. Peinemann F, Bartel C, Grouven U. First-line allogeneic hematopoietic stem cell  
23  
24 transplantation of HLA-matched sibling donors compared with first-line ciclosporin  
25  
26 and/or antithymocyte or antilymphocyte globulin for acquired severe aplastic  
27  
28 anemia. Cochrane Database of Systematic Reviews 2013; (7).  
29  
30 <http://onlinelibrary.wiley.com/doi/10.1002/14651858.CD006407.pub2/abstract>.  
31
- 32 226. Peinemann F, Enk H, Smith Lesley A. Autologous hematopoietic stem cell  
33  
34 transplantation following high-dose chemotherapy for nonrhabdomyosarcoma soft  
35  
36 tissue sarcomas. Cochrane Database of Systematic Reviews 2013; (4).  
37  
38 <http://onlinelibrary.wiley.com/doi/10.1002/14651858.CD008216.pub5/abstract>.  
39
- 40 227. Peinemann F, Grouven U, Hemkens Lars G, et al. Low-dose rate brachytherapy for men  
41  
42 with localized prostate cancer. Cochrane Database of Systematic Reviews 2011; (7).  
43  
44 <http://onlinelibrary.wiley.com/doi/10.1002/14651858.CD008871.pub2/abstract>.  
45
- 46 228. Peinemann F, Kahangire Doreen A, van Dalen Elvira C, et al. Rapid COJEC versus  
47  
48 standard induction therapies for high-risk neuroblastoma. Cochrane Database of  
49  
50 Systematic Reviews 2015; (5).  
51  
52 <http://onlinelibrary.wiley.com/doi/10.1002/14651858.CD010774.pub2/abstract>.  
53  
54



- 1  
2  
3  
4  
5  
6 229. Peinemann F, van Dalen Elvira C, Kahangire Doreen A, et al. Retinoic acid post  
7  
8 consolidation therapy for high-risk neuroblastoma patients treated with autologous  
9  
10 hematopoietic stem cell transplantation. Cochrane Database of Systematic Reviews  
11  
12 2015; (1).  
13  
14 <http://onlinelibrary.wiley.com/doi/10.1002/14651858.CD010685.pub2/abstract>.  
15
- 16 230. Pelayo Alvarez M, Westeel V, Cortés-Jofré M, et al. Chemotherapy versus best  
17  
18 supportive care for extensive small cell lung cancer. Cochrane Database of Systematic  
19  
20 Reviews 2013; (11).  
21  
22 <http://onlinelibrary.wiley.com/doi/10.1002/14651858.CD001990.pub3/abstract>.  
23
- 24 231. Peng L, Min S, Zejun Z, et al. Spinal cord stimulation for cancer-related pain in adults.  
25  
26 Cochrane Database of Systematic Reviews 2015; (6).  
27  
28 <http://onlinelibrary.wiley.com/doi/10.1002/14651858.CD009389.pub3/abstract>.  
29
- 30 232. Pepas L, Kaushik S, Nordin A, et al. Medical interventions for high-grade vulval  
31  
32 intraepithelial neoplasia. Cochrane Database of Systematic Reviews 2015; (8).  
33  
34 <http://onlinelibrary.wiley.com/doi/10.1002/14651858.CD007924.pub3/abstract>.  
35
- 36 233. Petersen Sune H, Harling H, Kirkeby Lene T, et al. Postoperative adjuvant chemotherapy  
37  
38 in rectal cancer operated for cure. Cochrane Database of Systematic Reviews 2012;  
39  
40 (3). <http://onlinelibrary.wiley.com/doi/10.1002/14651858.CD004078.pub2/abstract>.  
41
- 42 234. Phillips Robert S, Friend Amanda J, Gibson F, et al. Antiemetic medication for  
43  
44 prevention and treatment of chemotherapy-induced nausea and vomiting in  
45  
46 childhood. Cochrane Database of Systematic Reviews 2016; (2).  
47  
48 <http://onlinelibrary.wiley.com/doi/10.1002/14651858.CD007786.pub3/abstract>.  
49
- 50 235. Pidala J, Djulbegovic B, Anasetti C, et al. Allogeneic hematopoietic cell transplantation  
51  
52 for adult acute lymphoblastic leukemia (ALL) in first complete remission. Cochrane  
53  
54

- 1  
2  
3  
4  
5  
6 Database of Systematic Reviews 2011; (10).  
7  
8 <http://onlinelibrary.wiley.com/doi/10.1002/14651858.CD008818.pub2/abstract>.  
9
- 10 236. Preston Nancy J, Hurlow A, Brine J, et al. Blood transfusions for anaemia in patients  
11 with advanced cancer. Cochrane Database of Systematic Reviews 2012; (2).  
12  
13 <http://onlinelibrary.wiley.com/doi/10.1002/14651858.CD009007.pub2/abstract>.  
14  
15
- 16 237. Rai Bhavan P, Shelley M, Coles B, et al. Surgical management for upper urinary tract  
17 transitional cell carcinoma. Cochrane Database of Systematic Reviews 2011; (4).  
18  
19 <http://onlinelibrary.wiley.com/doi/10.1002/14651858.CD007349.pub2/abstract>.  
20  
21
- 22 238. Rancea M, Monsef I, von Tresckow B, et al. High-dose chemotherapy followed by  
23 autologous stem cell transplantation for patients with relapsed/refractory Hodgkin  
24 lymphoma. Cochrane Database of Systematic Reviews 2013; (6).  
25  
26 <http://onlinelibrary.wiley.com/doi/10.1002/14651858.CD009411.pub2/abstract>.  
27  
28
- 29 239. Rao Ahsan M, Ahmed I. Laparoscopic versus open liver resection for benign and  
30 malignant hepatic lesions in adults. Cochrane Database of Systematic Reviews 2013;  
31 (5). <http://onlinelibrary.wiley.com/doi/10.1002/14651858.CD010162.pub2/abstract>.  
32  
33
- 34 240. Ratnavelu Nithya DG, Brown Andrew P, Mallett S, et al. Intraoperative frozen section  
35 analysis for the diagnosis of early stage ovarian cancer in suspicious pelvic masses.  
36  
37 Cochrane Database of Systematic Reviews 2016; (3).  
38  
39 <http://onlinelibrary.wiley.com/doi/10.1002/14651858.CD010360.pub2/abstract>.  
40  
41
- 42 241. Reid J, Mills M, Cantwell M, et al. Thalidomide for managing cancer cachexia. Cochrane  
43 Database of Systematic Reviews 2012; (4).  
44  
45 <http://onlinelibrary.wiley.com/doi/10.1002/14651858.CD008664.pub2/abstract>.  
46  
47
- 48 242. Renner P, Milazzo S, Liu Jian P, et al. Primary prophylactic colony-stimulating factors for  
49 the prevention of chemotherapy-induced febrile neutropenia in breast cancer  
50  
51  
52  
53  
54

- 1  
2  
3  
4  
5  
6 patients. Cochrane Database of Systematic Reviews 2012; (10).  
7  
8 <http://onlinelibrary.wiley.com/doi/10.1002/14651858.CD007913.pub2/abstract>.  
9
- 10 243. Resende Heloisa M, Jacob Luiz Felipe P, Quinellato Luciano V, et al. Combination  
11 chemotherapy versus single-agent chemotherapy during preoperative  
12 chemoradiation for resectable rectal cancer. Cochrane Database of Systematic  
13 Reviews 2015; (10).  
14  
15 <http://onlinelibrary.wiley.com/doi/10.1002/14651858.CD008531.pub2/abstract>.  
16  
17
- 18 244. Reveiz L, Rueda J-R, Cardona Andrés F. Palliative endobronchial brachytherapy for non-  
19 small cell lung cancer. Cochrane Database of Systematic Reviews 2012; (12).  
20  
21 <http://onlinelibrary.wiley.com/doi/10.1002/14651858.CD004284.pub3/abstract>.  
22  
23
- 24 245. Reveiz L, Rueda J-R, Cardona Andrés F. Chemotherapy for brain metastases from small  
25 cell lung cancer. Cochrane Database of Systematic Reviews 2012; (6).  
26  
27 <http://onlinelibrary.wiley.com/doi/10.1002/14651858.CD007464.pub2/abstract>.  
28  
29
- 30 246. Riemsma Robert P, Bala Malgorzata M, Wolff R, et al. Percutaneous ethanol injection  
31 for liver metastases. Cochrane Database of Systematic Reviews 2013; (5).  
32  
33 <http://onlinelibrary.wiley.com/doi/10.1002/14651858.CD008717.pub2/abstract>.  
34  
35
- 36 247. Riemsma Robert P, Bala Malgorzata M, Wolff R, et al. Electro-coagulation for liver  
37 metastases. Cochrane Database of Systematic Reviews 2013; (5).  
38  
39 <http://onlinelibrary.wiley.com/doi/10.1002/14651858.CD009497.pub2/abstract>.  
40  
41
- 42 248. Riemsma Robert P, Bala Malgorzata M, Wolff R, et al. Transarterial  
43 (chemo)embolisation versus no intervention or placebo intervention for liver  
44 metastases. Cochrane Database of Systematic Reviews 2013; (4).  
45  
46 <http://onlinelibrary.wiley.com/doi/10.1002/14651858.CD009498.pub3/abstract>.  
47  
48  
49  
50  
51  
52  
53  
54  
55  
56  
57  
58  
59  
60

- 1  
2  
3  
4  
5  
6 249. Riviere D, Gurusamy Kurinchi S, Kooby David A, et al. Laparoscopic versus open distal  
7  
8 pancreatotomy for pancreatic cancer. Cochrane Database of Systematic Reviews  
9  
10 2016; (4).  
11  
12 <http://onlinelibrary.wiley.com/doi/10.1002/14651858.CD011391.pub2/abstract>.  
13
- 14 250. Rizzuto I, Behrens Renee F, Smith Lesley A. Risk of ovarian cancer in women treated  
15  
16 with ovarian stimulating drugs for infertility. Cochrane Database of Systematic  
17  
18 Reviews 2013; (8).  
19  
20 <http://onlinelibrary.wiley.com/doi/10.1002/14651858.CD008215.pub2/abstract>.  
21
- 22 251. Robertson L, Yeoh Su E, Stansby G, et al. Effect of testing for cancer on cancer- and  
23  
24 venous thromboembolism (VTE)-related mortality and morbidity in patients with  
25  
26 unprovoked VTE. Cochrane Database of Systematic Reviews 2015; (3).  
27  
28 <http://onlinelibrary.wiley.com/doi/10.1002/14651858.CD010837.pub2/abstract>.  
29
- 30 252. Rogers L, Siu Shing Shun N, Luesley D, et al. Radiotherapy and chemoradiation after  
31  
32 surgery for early cervical cancer. Cochrane Database of Systematic Reviews 2012; (5).  
33  
34 <http://onlinelibrary.wiley.com/doi/10.1002/14651858.CD007583.pub3/abstract>.  
35
- 36 253. Ronellenfitsch U, Schwarzbach M, Hofheinz R, et al. Perioperative chemo(radio)therapy  
37  
38 versus primary surgery for resectable adenocarcinoma of the stomach,  
39  
40 gastroesophageal junction, and lower esophagus. Cochrane Database of Systematic  
41  
42 Reviews 2013; (5).  
43  
44 <http://onlinelibrary.wiley.com/doi/10.1002/14651858.CD008107.pub2/abstract>.  
45
- 46 254. Rooney Alasdair G, Grant R. Pharmacological treatment of depression in patients with a  
47  
48 primary brain tumour. Cochrane Database of Systematic Reviews 2013; (5).  
49  
50 <http://onlinelibrary.wiley.com/doi/10.1002/14651858.CD006932.pub3/abstract>.  
51  
52  
53  
54  
55  
56  
57  
58  
59  
60

1  
2  
3  
4  
5  
6  
7  
8  
9  
10  
11  
12  
13  
14  
15  
16  
17  
18  
19  
20  
21  
22  
23  
24  
25  
26  
27  
28  
29  
30  
31  
32  
33  
34  
35  
36  
37  
38  
39  
40  
41  
42  
43  
44  
45  
46  
47  
48  
49  
50  
51  
52  
53  
54  
55  
56  
57  
58  
59  
60

255. Roqué i Figuls M, Martinez-Zapata Maria J, Scott-Brown M, et al. Radioisotopes for metastatic bone pain. Cochrane Database of Systematic Reviews 2011; (3).  
<http://onlinelibrary.wiley.com/doi/10.1002/14651858.CD003347.pub3/abstract>.
256. Rosa D, Medeiros L, Edelweiss MI, et al. Adjuvant platinum-based chemotherapy for early stage cervical cancer. Cochrane Database of Systematic Reviews 2012; (11).  
<http://onlinelibrary.wiley.com/doi/10.1002/14651858.CD005342.pub4/abstract>.
257. Rueda J-R, Solà I, Pascual A, et al. Non-invasive interventions for improving well-being and quality of life in patients with lung cancer. Cochrane Database of Systematic Reviews 2011; (9).  
<http://onlinelibrary.wiley.com/doi/10.1002/14651858.CD004282.pub3/abstract>.
258. Rutten Marianne J, Leeflang Mariska MG, Kenter Gemma G, et al. Laparoscopy for diagnosing resectability of disease in patients with advanced ovarian cancer. Cochrane Database of Systematic Reviews 2014; (2).  
<http://onlinelibrary.wiley.com/doi/10.1002/14651858.CD009786.pub2/abstract>.
259. Ryzewska L, Tierney J, Vale Claire L, et al. Neoadjuvant chemotherapy plus surgery versus surgery for cervical cancer. Cochrane Database of Systematic Reviews 2012; (12).  
<http://onlinelibrary.wiley.com/doi/10.1002/14651858.CD007406.pub3/abstract>.
260. Salhofer I, Will A, Monsef I, et al. Meditation for adults with haematological malignancies. Cochrane Database of Systematic Reviews 2016; (2).  
<http://onlinelibrary.wiley.com/doi/10.1002/14651858.CD011157.pub2/abstract>.
261. Samuel M, Khin Lay W, Brennan Victoria K, et al. Timing of breast surgery in premenopausal breast cancer patients. Cochrane Database of Systematic Reviews

2011; (5).

<http://onlinelibrary.wiley.com/doi/10.1002/14651858.CD003720.pub2/abstract>.

262. Santos Fábio N, de Castria Tiago B, Cruz Marcelo RS, et al. Chemotherapy for advanced non-small cell lung cancer in the elderly population. Cochrane Database of Systematic Reviews 2015; (10).

<http://onlinelibrary.wiley.com/doi/10.1002/14651858.CD010463.pub2/abstract>.

263. Sarmiento JM, Venteicher Andrew S, Patil Chirag G. Early versus delayed postoperative radiotherapy for treatment of low-grade gliomas. Cochrane Database of Systematic Reviews 2015; (6).

<http://onlinelibrary.wiley.com/doi/10.1002/14651858.CD009229.pub2/abstract>.

264. Scatchard K, Forrest Jennifer L, Flubacher M, et al. Chemotherapy for metastatic and recurrent cervical cancer. Cochrane Database of Systematic Reviews 2012; (10).

<http://onlinelibrary.wiley.com/doi/10.1002/14651858.CD006469.pub2/abstract>.

265. Schaaf M, Reiser M, Borchmann P, et al. High-dose therapy with autologous stem cell transplantation versus chemotherapy or immuno-chemotherapy for follicular lymphoma in adults. Cochrane Database of Systematic Reviews 2012; (1).

<http://onlinelibrary.wiley.com/doi/10.1002/14651858.CD007678.pub2/abstract>.

266. Schlaak M, Pickenhain J, Theurich S, et al. Allogeneic stem cell transplantation versus conventional therapy for advanced primary cutaneous T-cell lymphoma. Cochrane Database of Systematic Reviews 2013; (8).

<http://onlinelibrary.wiley.com/doi/10.1002/14651858.CD008908.pub3/abstract>.

267. Schmidt-Hansen M, Baldwin David R, Hasler E, et al. PET-CT for assessing mediastinal lymph node involvement in patients with suspected resectable non-small cell lung

- 1  
2  
3  
4  
5  
6 cancer. Cochrane Database of Systematic Reviews 2014; (11).  
7  
8 <http://onlinelibrary.wiley.com/doi/10.1002/14651858.CD009519.pub2/abstract>.  
9
- 10 268. Schmidt-Hansen M, Bennett Michael I, Arnold S, et al. Oxycodone for cancer-related  
11 pain. Cochrane Database of Systematic Reviews 2015; (2).  
12  
13 <http://onlinelibrary.wiley.com/doi/10.1002/14651858.CD003870.pub5/abstract>.  
14  
15
- 16 269. Schmidt-Hansen M, Bromham N, Taubert M, et al. Buprenorphine for treating cancer  
17 pain. Cochrane Database of Systematic Reviews 2015; (3).  
18  
19 <http://onlinelibrary.wiley.com/doi/10.1002/14651858.CD009596.pub4/abstract>.  
20  
21
- 22 270. Schoot Reineke A, Kremer Leontien CM, van de Wetering Marianne D, et al. Systemic  
23 treatments for the prevention of venous thrombo-embolic events in paediatric  
24 cancer patients with tunnelled central venous catheters. Cochrane Database of  
25 Systematic Reviews 2013; (9).  
26  
27 <http://onlinelibrary.wiley.com/doi/10.1002/14651858.CD009160.pub2/abstract>.  
28  
29
- 30 271. Schoot Reineke A, van Dalen Elvira C, van Ommen Cornelia H, et al. Antibiotic and other  
31 lock treatments for tunnelled central venous catheter-related infections in children  
32 with cancer. Cochrane Database of Systematic Reviews 2013; (6).  
33  
34 <http://onlinelibrary.wiley.com/doi/10.1002/14651858.CD008975.pub2/abstract>.  
35  
36
- 37 272. Scott David A, Mills M, Black A, et al. Multidimensional rehabilitation programmes for  
38 adult cancer survivors. Cochrane Database of Systematic Reviews 2013; (3).  
39  
40 <http://onlinelibrary.wiley.com/doi/10.1002/14651858.CD007730.pub2/abstract>.  
41  
42
- 43 273. Scott K, Hayden Patrick J, Will A, et al. Bortezomib for the treatment of multiple  
44 myeloma. Cochrane Database of Systematic Reviews 2016; (4).  
45  
46 <http://onlinelibrary.wiley.com/doi/10.1002/14651858.CD010816.pub2/abstract>.  
47  
48  
49  
50  
51  
52  
53  
54  
55  
56  
57  
58  
59  
60

- 1  
2  
3  
4  
5  
6 274. Semple C, Parahoo K, Norman A, et al. Psychosocial interventions for patients with head  
7 and neck cancer. Cochrane Database of Systematic Reviews 2013; (7).  
8  
9 <http://onlinelibrary.wiley.com/doi/10.1002/14651858.CD009441.pub2/abstract>.  
10  
11  
12 275. Shang Pan F, Kwong J, Wang Zhi P, et al. Intravesical Bacillus Calmette-Guérin versus  
13 epirubicin for Ta and T1 bladder cancer. Cochrane Database of Systematic Reviews  
14 2011; (5).  
15  
16 <http://onlinelibrary.wiley.com/doi/10.1002/14651858.CD006885.pub2/abstract>.  
17  
18  
19 276. Sharif Fyeza NJ, Oliver R, Sweet C, et al. Interventions for the treatment of keratocystic  
20 odontogenic tumours. Cochrane Database of Systematic Reviews 2015; (11).  
21  
22 <http://onlinelibrary.wiley.com/doi/10.1002/14651858.CD008464.pub3/abstract>.  
23  
24  
25 277. Shelley M, Cleves A, Wilt Timothy J, et al. Gemcitabine for unresectable, locally  
26 advanced or metastatic bladder cancer. Cochrane Database of Systematic Reviews  
27 2011; (4).  
28  
29 <http://onlinelibrary.wiley.com/doi/10.1002/14651858.CD008976.pub2/abstract>.  
30  
31  
32 278. Shepherd Jonathan P, Frampton Geoff K, Harris P. Interventions for encouraging sexual  
33 behaviours intended to prevent cervical cancer. Cochrane Database of Systematic  
34 Reviews 2011; (4).  
35  
36 <http://onlinelibrary.wiley.com/doi/10.1002/14651858.CD001035.pub2/abstract>.  
37  
38  
39 279. Shylasree TS, Bryant A, Athavale R. Chemotherapy and/or radiotherapy in combination  
40 with surgery for ovarian carcinosarcoma. Cochrane Database of Systematic Reviews  
41 2013; (2).  
42  
43 <http://onlinelibrary.wiley.com/doi/10.1002/14651858.CD006246.pub2/abstract>.  
44  
45  
46  
47  
48  
49  
50  
51  
52  
53  
54  
55  
56  
57  
58  
59  
60



1  
2  
3  
4  
5  
6 280. Shylasree TS, Bryant A, Howells Robert EJ. Chemoradiation for advanced primary vulval  
7 cancer. Cochrane Database of Systematic Reviews 2011; (4).

8  
9  
10 <http://onlinelibrary.wiley.com/doi/10.1002/14651858.CD003752.pub3/abstract>.

11  
12 281. Sickinger M-T, von Tresckow B, Kobe C, et al. Positron emission tomography-adapted  
13 therapy for first-line treatment in individuals with Hodgkin lymphoma. Cochrane  
14 Database of Systematic Reviews 2015; (1).

15  
16  
17 <http://onlinelibrary.wiley.com/doi/10.1002/14651858.CD010533.pub2/abstract>.

18  
19  
20 282. Skoetz N, Bauer K, Elter T, et al. Alemtuzumab for patients with chronic lymphocytic  
21 leukaemia. Cochrane Database of Systematic Reviews 2012; (2).

22  
23 <http://onlinelibrary.wiley.com/doi/10.1002/14651858.CD008078.pub2/abstract>.

24  
25 283. Skoetz N, Bohlius J, Engert A, et al. Prophylactic antibiotics or G(M)-CSF for the  
26 prevention of infections and improvement of survival in cancer patients receiving  
27 myelotoxic chemotherapy. Cochrane Database of Systematic Reviews 2015; (12).

28  
29  
30 <http://onlinelibrary.wiley.com/doi/10.1002/14651858.CD007107.pub3/abstract>.

31  
32  
33 284. Smith Lesley A, Azariah F, Lavender Verna TC, et al. Cannabinoids for nausea and  
34 vomiting in adults with cancer receiving chemotherapy. Cochrane Database of  
35 Systematic Reviews 2015; (11).

36  
37  
38 <http://onlinelibrary.wiley.com/doi/10.1002/14651858.CD009464.pub2/abstract>.

39  
40  
41 285. Song H, Zhu J, Lu D. Long-term proton pump inhibitor (PPI) use and the development of  
42 gastric pre-malignant lesions. Cochrane Database of Systematic Reviews 2014; (12).

43  
44  
45 <http://onlinelibrary.wiley.com/doi/10.1002/14651858.CD010623.pub2/abstract>.

46  
47  
48 286. Soon Yu Y, Tham Ivan Weng K, Lim Keith H, et al. Surgery or radiosurgery plus whole  
49 brain radiotherapy versus surgery or radiosurgery alone for brain metastases.

Formatted: English (U.S.), Do not check spelling or grammar

Formatted: English (U.S.), Do not check spelling or grammar

- 1  
2  
3  
4  
5  
6  
7  
8  
9  
10  
11  
12  
13  
14  
15  
16  
17  
18  
19  
20  
21  
22  
23  
24  
25  
26  
27  
28  
29  
30  
31  
32  
33  
34  
35  
36  
37  
38  
39  
40  
41  
42  
43  
44  
45  
46  
47  
48  
49  
50  
51  
52  
53  
54  
55  
56  
57  
58  
59  
60
- Cochrane Database of Systematic Reviews 2014; (3).  
<http://onlinelibrary.wiley.com/doi/10.1002/14651858.CD009454.pub2/abstract>.
287. Spanjersberg Willem R, Reurings J, Keus F, et al. Fast track surgery versus conventional recovery strategies for colorectal surgery. Cochrane Database of Systematic Reviews 2011; (2).  
<http://onlinelibrary.wiley.com/doi/10.1002/14651858.CD007635.pub2/abstract>.
288. Staley H, McCallum I, Bruce J. Postoperative tamoxifen for ductal carcinoma in situ. Cochrane Database of Systematic Reviews 2012; (10).  
<http://onlinelibrary.wiley.com/doi/10.1002/14651858.CD007847.pub2/abstract>.
289. Stevens R, Macbeth F, Toy E, et al. Palliative radiotherapy regimens for patients with thoracic symptoms from non-small cell lung cancer. Cochrane Database of Systematic Reviews 2015; (1).  
<http://onlinelibrary.wiley.com/doi/10.1002/14651858.CD002143.pub4/abstract>.
290. Straube C, Derry S, Jackson Kenneth C, et al. Codeine, alone and with paracetamol (acetaminophen), for cancer pain. Cochrane Database of Systematic Reviews 2014; (9). <http://onlinelibrary.wiley.com/doi/10.1002/14651858.CD006601.pub4/abstract>.
291. Stuver Martijn M, ten Tusscher Marieke R, Agasi-Idenburg Carla S, et al. Conservative interventions for preventing clinically detectable upper-limb lymphoedema in patients who are at risk of developing lymphoedema after breast cancer therapy. Cochrane Database of Systematic Reviews 2015; (2).  
<http://onlinelibrary.wiley.com/doi/10.1002/14651858.CD009765.pub2/abstract>.
292. Taefi A, Abrishami A, Nasseri-Moghaddam S, et al. Surgical resection versus liver transplant for patients with hepatocellular carcinoma. Cochrane Database of

- 1  
2  
3  
4  
5  
6 Systematic Reviews 2013; (6).  
7  
8 <http://onlinelibrary.wiley.com/doi/10.1002/14651858.CD006935.pub2/abstract>.  
9
- 10 293. Tangjitgamol S, Katanyoo K, Laopaiboon M, et al. Adjuvant chemotherapy after  
11 concurrent chemoradiation for locally advanced cervical cancer. Cochrane Database  
12 of Systematic Reviews 2014; (12).  
13  
14 <http://onlinelibrary.wiley.com/doi/10.1002/14651858.CD010401.pub2/abstract>.  
15  
16 294. Theurich S, Fischmann H, Shimabukuro-Vornhagen A, et al. Polyclonal anti-thymocyte  
17 globulins for the prophylaxis of graft-versus-host disease after allogeneic stem cell or  
18 bone marrow transplantation in adults. Cochrane Database of Systematic Reviews  
19 2012; (9).  
20  
21 <http://onlinelibrary.wiley.com/doi/10.1002/14651858.CD009159.pub2/abstract>.  
22  
23 295. Thomson David R, Sadideen H, Furniss D. Wound drainage after axillary dissection for  
24 carcinoma of the breast. Cochrane Database of Systematic Reviews 2013; (10).  
25  
26 <http://onlinelibrary.wiley.com/doi/10.1002/14651858.CD006823.pub2/abstract>.  
27  
28 296. Tonia T, Mettler A, Robert N, et al. Erythropoietin or darbepoetin for patients with  
29 cancer. Cochrane Database of Systematic Reviews 2012; (12).  
30  
31 <http://onlinelibrary.wiley.com/doi/10.1002/14651858.CD003407.pub5/abstract>.  
32  
33 297. Torres Maria FS, Porfirio Gustavo JM, Carvalho Alan PV, et al. Non-invasive positive  
34 pressure ventilation for prevention of complications after pulmonary resection in  
35 lung cancer patients. Cochrane Database of Systematic Reviews 2015; (9).  
36  
37 <http://onlinelibrary.wiley.com/doi/10.1002/14651858.CD010355.pub2/abstract>.  
38  
39 298. Tou S, Malik Ali I, Wexner Steven D, et al. Energy source instruments for laparoscopic  
40 colectomy. Cochrane Database of Systematic Reviews 2011; (5).  
41  
42 <http://onlinelibrary.wiley.com/doi/10.1002/14651858.CD007886.pub2/abstract>.  
43  
44  
45  
46  
47  
48  
49  
50  
51  
52  
53  
54  
55  
56  
57  
58  
59  
60

- 1  
2  
3  
4  
5  
6  
7 299. Tsao May N, Lloyd N, Wong Rebecca KS, et al. Whole brain radiotherapy for the  
8 treatment of newly diagnosed multiple brain metastases. Cochrane Database of  
9 Systematic Reviews 2012; (4).  
10 <http://onlinelibrary.wiley.com/doi/10.1002/14651858.CD003869.pub3/abstract>.  
11  
12  
13  
14 300. Tzellos T, Kyrgidis A, Mocellin S, et al. Interventions for melanoma in situ, including  
15 lentigo maligna. Cochrane Database of Systematic Reviews 2014; (12).  
16 <http://onlinelibrary.wiley.com/doi/10.1002/14651858.CD010308.pub2/abstract>.  
17  
18  
19  
20 301. Vale Claire L, Tierney J, Bull Sarah J, et al. Chemotherapy for advanced, recurrent or  
21 metastatic endometrial carcinoma. Cochrane Database of Systematic Reviews 2012;  
22 (8). <http://onlinelibrary.wiley.com/doi/10.1002/14651858.CD003915.pub4/abstract>.  
23  
24  
25  
26 302. van Dalen Elvira C, Caron Huib N, Dickinson Heather O, et al. Cardioprotective  
27 interventions for cancer patients receiving anthracyclines. Cochrane Database of  
28 Systematic Reviews 2011; (6).  
29 <http://onlinelibrary.wiley.com/doi/10.1002/14651858.CD003917.pub4/abstract>.  
30  
31  
32  
33 303. van Dalen Elvira C, de Lijster Manou S, Leijssen Lieve GJ, et al. Minimally invasive  
34 surgery versus open surgery for the treatment of solid abdominal and thoracic  
35 neoplasms in children. Cochrane Database of Systematic Reviews 2015; (1).  
36 <http://onlinelibrary.wiley.com/doi/10.1002/14651858.CD008403.pub3/abstract>.  
37  
38  
39  
40 304. van Dalen Elvira C, Mank A, Leclercq E, et al. Low bacterial diet versus control diet to  
41 prevent infection in cancer patients treated with chemotherapy causing episodes of  
42 neutropenia. Cochrane Database of Systematic Reviews 2016; (4).  
43 <http://onlinelibrary.wiley.com/doi/10.1002/14651858.CD006247.pub3/abstract>.  
44  
45  
46  
47 305. van Dalen Elvira C, Raphaël Martine F, Caron Huib N, et al. Treatment including  
48 anthracyclines versus treatment not including anthracyclines for childhood cancer.  
49  
50  
51  
52  
53  
54  
55  
56  
57  
58  
59  
60

1  
2  
3  
4  
5  
6  
7  
8  
9  
10  
11  
12  
13  
14  
15  
16  
17  
18  
19  
20  
21  
22  
23  
24  
25  
26  
27  
28  
29  
30  
31  
32  
33  
34  
35  
36  
37  
38  
39  
40  
41  
42  
43  
44  
45  
46  
47  
48  
49  
50  
51  
52  
53  
54  
55  
56  
57  
58  
59  
60

Cochrane Database of Systematic Reviews 2014; (9).

<http://onlinelibrary.wiley.com/doi/10.1002/14651858.CD006647.pub4/abstract>.

306. van Dalen Elvira C, van As Jorrit W, de Camargo B. Methotrexate for high-grade osteosarcoma in children and young adults. Cochrane Database of Systematic Reviews 2011; (5).

<http://onlinelibrary.wiley.com/doi/10.1002/14651858.CD006325.pub3/abstract>.

307. van Dalen Elvira C, van der Pal Helena JH, Kremer Leontien CM. Different dosage schedules for reducing cardiotoxicity in people with cancer receiving anthracycline chemotherapy. Cochrane Database of Systematic Reviews 2016; (3).

<http://onlinelibrary.wiley.com/doi/10.1002/14651858.CD005008.pub4/abstract>.

308. van de Wetering Fleur T, Verleye L, Andreyev HJN, et al. Non-surgical interventions for late rectal problems (proctopathy) of radiotherapy in people who have received radiotherapy to the pelvis. Cochrane Database of Systematic Reviews 2016; (4).

<http://onlinelibrary.wiley.com/doi/10.1002/14651858.CD003455.pub2/abstract>.

309. van de Wetering Marianne D, van Woensel Job BM, Lawrie Theresa A. Prophylactic antibiotics for preventing Gram positive infections associated with long-term central venous catheters in oncology patients. Cochrane Database of Systematic Reviews 2013; (11).

<http://onlinelibrary.wiley.com/doi/10.1002/14651858.CD003295.pub3/abstract>.

310. van der Heijden E, Lopes Alberto D, Bryant A, et al. Follow-up strategies after treatment (large loop excision of the transformation zone (LLETZ)) for cervical intraepithelial neoplasia (CIN): Impact of human papillomavirus (HPV) test. Cochrane Database of Systematic Reviews 2015; (1).

<http://onlinelibrary.wiley.com/doi/10.1002/14651858.CD010757.pub2/abstract>.

- 1  
2  
3  
4  
5  
6  
7  
8  
9  
10  
11  
12  
13  
14  
15  
16  
17  
18  
19  
20  
21  
22  
23  
24  
25  
26  
27  
28  
29  
30  
31  
32  
33  
34  
35  
36  
37  
38  
39  
40  
41  
42  
43  
44  
45  
46  
47  
48  
49  
50  
51  
52  
53  
54  
55  
56  
57  
58  
59  
60
311. van der Velden J, Fons G, Lawrie Theresa A. Primary groin irradiation versus primary groin surgery for early vulvar cancer. Cochrane Database of Systematic Reviews 2011; (5). <http://onlinelibrary.wiley.com/doi/10.1002/14651858.CD002224.pub2/abstract>.
312. Veeravagu A, Chang Steven D, Black Keith L, et al. Biopsy versus resection for the management of low-grade gliomas. Cochrane Database of Systematic Reviews 2013; (4). <http://onlinelibrary.wiley.com/doi/10.1002/14651858.CD009319.pub3/abstract>.
313. Vennix S, Pelzers L, Bouvy N, et al. Laparoscopic versus open total mesorectal excision for rectal cancer. Cochrane Database of Systematic Reviews 2014; (4). <http://onlinelibrary.wiley.com/doi/10.1002/14651858.CD005200.pub3/abstract>.
314. Vidal L, Ben dor I, Paul M, et al. Oral versus intravenous antibiotic treatment for febrile neutropenia in cancer patients. Cochrane Database of Systematic Reviews 2013; (10). <http://onlinelibrary.wiley.com/doi/10.1002/14651858.CD003992.pub3/abstract>.
315. Vidal L, Gafter-Gvili A, Gurion R, et al. Bendamustine for patients with indolent B cell lymphoid malignancies including chronic lymphocytic leukaemia. Cochrane Database of Systematic Reviews 2012; (9). <http://onlinelibrary.wiley.com/doi/10.1002/14651858.CD009045.pub2/abstract>.
316. Vinceti M, Dennert G, Crespi Catherine M, et al. Selenium for preventing cancer. Cochrane Database of Systematic Reviews 2014; (3). <http://onlinelibrary.wiley.com/doi/10.1002/14651858.CD005195.pub3/abstract>.
317. Wagner Anna D, Thomssen C, Haerting J, et al. Vascular-endothelial-growth-factor (VEGF) targeting therapies for endocrine refractory or resistant metastatic breast cancer. Cochrane Database of Systematic Reviews 2012; (7). <http://onlinelibrary.wiley.com/doi/10.1002/14651858.CD008941.pub2/abstract>.

1  
2  
3  
4  
5  
6  
7  
8  
9  
10  
11  
12  
13  
14  
15  
16  
17  
18  
19  
20  
21  
22  
23  
24  
25  
26  
27  
28  
29  
30  
31  
32  
33  
34  
35  
36  
37  
38  
39  
40  
41  
42  
43  
44  
45  
46  
47  
48  
49  
50  
51  
52  
53  
54  
55  
56  
57  
58  
59  
60

318. Walsh T, Liu Joseph LY, Brocklehurst P, et al. Clinical assessment to screen for the detection of oral cavity cancer and potentially malignant disorders in apparently healthy adults. Cochrane Database of Systematic Reviews 2013; (11).  
<http://onlinelibrary.wiley.com/doi/10.1002/14651858.CD010173.pub2/abstract>.
319. Wang Z, Chen J, Su K, et al. Abdominal drainage versus no drainage post-gastrectomy for gastric cancer. Cochrane Database of Systematic Reviews 2015; (5).  
<http://onlinelibrary.wiley.com/doi/10.1002/14651858.CD008788.pub3/abstract>.
320. Ward Evelyn J, Henry Lisa M, Friend Amanda J, et al. Nutritional support in children and young people with cancer undergoing chemotherapy. Cochrane Database of Systematic Reviews 2015; (8).  
<http://onlinelibrary.wiley.com/doi/10.1002/14651858.CD003298.pub3/abstract>.
321. Warner L, Chudasama J, Kelly Charles G, et al. Radiotherapy versus open surgery versus endolaryngeal surgery (with or without laser) for early laryngeal squamous cell cancer. Cochrane Database of Systematic Reviews 2014; (12).  
<http://onlinelibrary.wiley.com/doi/10.1002/14651858.CD002027.pub2/abstract>.
322. Weberschock T, Strametz R, Lorenz M, et al. Interventions for mycosis fungoides. Cochrane Database of Systematic Reviews 2012; (9).  
<http://onlinelibrary.wiley.com/doi/10.1002/14651858.CD008946.pub2/abstract>.
323. Wei Mao L, Kang D, Gu L, et al. Chemotherapy for thymic carcinoma and advanced thymoma in adults. Cochrane Database of Systematic Reviews 2013; (8).  
<http://onlinelibrary.wiley.com/doi/10.1002/14651858.CD008588.pub2/abstract>.
324. Weis S, Franke A, Berg T, et al. Percutaneous ethanol injection or percutaneous acetic acid injection for early hepatocellular carcinoma. Cochrane Database of Systematic

1  
2  
3  
4  
5  
6  
7  
8  
9  
10  
11  
12  
13  
14  
15  
16  
17  
18  
19  
20  
21  
22  
23  
24  
25  
26  
27  
28  
29  
30  
31  
32  
33  
34  
35  
36  
37  
38  
39  
40  
41  
42  
43  
44  
45  
46  
47  
48  
49  
50  
51  
52  
53  
54  
55  
56  
57  
58  
59  
60

Reviews 2015; (1).

<http://onlinelibrary.wiley.com/doi/10.1002/14651858.CD006745.pub3/abstract>.

325. Weis S, Franke A, Mössner J, et al. Radiofrequency (thermal) ablation versus no intervention or other interventions for hepatocellular carcinoma. Cochrane Database of Systematic Reviews 2013; (12).

<http://onlinelibrary.wiley.com/doi/10.1002/14651858.CD003046.pub3/abstract>.

326. Weitz M, Strahm B, Meerpohl Joerg J, et al. Extracorporeal photopheresis versus alternative treatment for chronic graft-versus-host disease after haematopoietic stem cell transplantation in paediatric patients. Cochrane Database of Systematic Reviews 2015; (12).

<http://onlinelibrary.wiley.com/doi/10.1002/14651858.CD009898.pub3/abstract>.

327. Weitz M, Strahm B, Meerpohl Joerg J, et al. Extracorporeal photopheresis versus standard treatment for acute graft-versus-host disease after haematopoietic stem cell transplantation in paediatric patients. Cochrane Database of Systematic Reviews 2015; (12).

<http://onlinelibrary.wiley.com/doi/10.1002/14651858.CD009759.pub3/abstract>.

328. Wiffen Philip J, Derry S, Moore RA. Impact of morphine, fentanyl, oxycodone or codeine on patient consciousness, appetite and thirst when used to treat cancer pain. Cochrane Database of Systematic Reviews 2014; (5).

<http://onlinelibrary.wiley.com/doi/10.1002/14651858.CD011056.pub2/abstract>.

329. Wiffen Philip J, Derry S, Naessens K, et al. Oral tapentadol for cancer pain. Cochrane Database of Systematic Reviews 2015; (9).

<http://onlinelibrary.wiley.com/doi/10.1002/14651858.CD011460.pub2/abstract>.

**Formatted:** English (U.S.), Do not check spelling or grammar

**Formatted:** English (U.S.), Do not check spelling or grammar



- 1  
2  
3  
4  
5  
6  
7 330. Wiffen Philip J, Wee B, Moore RA. Oral morphine for cancer pain. Cochrane Database of  
8  
9 Systematic Reviews 2016; (4).  
10 <http://onlinelibrary.wiley.com/doi/10.1002/14651858.CD003868.pub4/abstract>.  
11  
12 331. Wiggans Alison J, Cass Gemma KS, Bryant A, et al. Poly(ADP-ribose) polymerase (PARP)  
13  
14 inhibitors for the treatment of ovarian cancer. Cochrane Database of Systematic  
15  
16 Reviews 2015; (5).  
17  
18 <http://onlinelibrary.wiley.com/doi/10.1002/14651858.CD007929.pub3/abstract>.  
19  
20 332. Williams C, Bryant A. Short versus long duration infusions of paclitaxel for any advanced  
21  
22 adenocarcinoma. Cochrane Database of Systematic Reviews 2011; (5).  
23  
24 <http://onlinelibrary.wiley.com/doi/10.1002/14651858.CD003911.pub2/abstract>.  
25  
26 333. Wolf E, Milazzo S, Boehm K, et al. Thymic peptides for treatment of cancer patients.  
27  
28 Cochrane Database of Systematic Reviews 2011; (2).  
29  
30 <http://onlinelibrary.wiley.com/doi/10.1002/14651858.CD003993.pub3/abstract>.  
31  
32 334. Wong Matthew HF, Stockler Martin R, Pavlakis N. Bisphosphonates and other bone  
33  
34 agents for breast cancer. Cochrane Database of Systematic Reviews 2012; (2).  
35  
36 <http://onlinelibrary.wiley.com/doi/10.1002/14651858.CD003474.pub3/abstract>.  
37  
38 335. Woo Yin L, Kyrgiou M, Bryant A, et al. Centralisation of services for gynaecological  
39  
40 cancer. Cochrane Database of Systematic Reviews 2012; (3).  
41  
42 <http://onlinelibrary.wiley.com/doi/10.1002/14651858.CD007945.pub2/abstract>.  
43  
44 336. Worthington Helen V, Clarkson Jan E, Bryan G, et al. Interventions for preventing oral  
45  
46 mucositis for patients with cancer receiving treatment. Cochrane Database of  
47  
48 Systematic Reviews 2011; (4).  
49  
50 <http://onlinelibrary.wiley.com/doi/10.1002/14651858.CD000978.pub5/abstract>.  
51  
52  
53  
54  
55  
56  
57  
58  
59  
60

- 1  
2  
3  
4  
5  
6 337. Wulaningsih W, Wardhana A, Watkins J, et al. Irinotecan chemotherapy combined with  
7  
8 fluoropyrimidines versus irinotecan alone for overall survival and progression-free  
9  
10 survival in patients with advanced and/or metastatic colorectal cancer. Cochrane  
11  
12 Database of Systematic Reviews 2016; (2).  
13  
14 <http://onlinelibrary.wiley.com/doi/10.1002/14651858.CD008593.pub3/abstract>.  
15
- 16 338. Yalçın B, Kremer Leontien CM, van Dalen Elvira C. High-dose chemotherapy and  
17  
18 autologous haematopoietic stem cell rescue for children with high-risk  
19  
20 neuroblastoma. Cochrane Database of Systematic Reviews 2015; (10).  
21  
22 <http://onlinelibrary.wiley.com/doi/10.1002/14651858.CD006301.pub4/abstract>.  
23
- 24 339. Yang J, Zhu L, Wu Z, et al. Chinese herbal medicines for induction of remission in  
25  
26 advanced or late gastric cancer. Cochrane Database of Systematic Reviews 2013; (4).  
27  
28 <http://onlinelibrary.wiley.com/doi/10.1002/14651858.CD005096.pub4/abstract>.  
29
- 30 340. Yang S, Wu S, Huang Y, et al. Screening for oesophageal cancer. Cochrane Database of  
31  
32 Systematic Reviews 2012; (12).  
33  
34 <http://onlinelibrary.wiley.com/doi/10.1002/14651858.CD007883.pub2/abstract>.  
35
- 36 341. Yang S, Wu S, Zhou J, et al. Screening for nasopharyngeal cancer. Cochrane Database of  
37  
38 Systematic Reviews 2015; (11).  
39  
40 <http://onlinelibrary.wiley.com/doi/10.1002/14651858.CD008423.pub2/abstract>.  
41
- 42 342. Yang Z-Y, Liu L, Mao C, et al. Chemotherapy with cetuximab versus chemotherapy alone  
43  
44 for chemotherapy-naïve advanced non-small cell lung cancer. Cochrane Database of  
45  
46 Systematic Reviews 2014; (11).  
47  
48 <http://onlinelibrary.wiley.com/doi/10.1002/14651858.CD009948.pub2/abstract>.  
49  
50  
51  
52  
53  
54  
55  
56  
57  
58  
59  
60

- 1  
2  
3  
4  
5  
6  
7 343. Yuan Y, Zeng X, Hu Y, et al. Omentoplasty for oesophagostomy after  
8 oesophagectomy. Cochrane Database of Systematic Reviews 2014; (10).  
9  
10 <http://onlinelibrary.wiley.com/doi/10.1002/14651858.CD008446.pub3/abstract>.  
11  
12 344. Zacher J, Kasenda B, Engert A, et al. The role of additional radiotherapy for primary  
13 central nervous system lymphoma. Cochrane Database of Systematic Reviews 2014;  
14  
15 (6). <http://onlinelibrary.wiley.com/doi/10.1002/14651858.CD009211.pub2/abstract>.  
16  
17 345. Zani Emerson L, Clark Otavio Augusto C, Rodrigues Netto Jr N. Antibiotic prophylaxis for  
18 transrectal prostate biopsy. Cochrane Database of Systematic Reviews 2011; (5).  
19  
20  
21 <http://onlinelibrary.wiley.com/doi/10.1002/14651858.CD006576.pub2/abstract>.  
22  
23 346. Zhong Jian H, Li Le Q, Wu Liu C. Lamivudine with or without adefovir  
24 dipivoxil for postoperative hepatocellular carcinoma. Cochrane Database of  
25 Systematic Reviews 2011; (12).  
26  
27 <http://onlinelibrary.wiley.com/doi/10.1002/14651858.CD008713.pub2/abstract>.  
28  
29

30  
31 *High impact journal SRs*

- 32  
33 1. Menarche, menopause, and breast cancer risk: individual participant meta-analysis,  
34 including 118 964 women with breast cancer from 117 epidemiological studies. The Lancet  
35 Oncology 2012;13(11):1141-51.  
36  
37 2. Preoperative chemotherapy for non-small-cell lung cancer: a systematic review and meta-  
38 analysis of individual participant data. Lancet (London, England) 2014;383(9928):1561-71.  
39  
40 3. Endometrial cancer and oral contraceptives: an individual participant meta-analysis of 27  
41 276 women with endometrial cancer from 36 epidemiological studies. The Lancet Oncology  
42  
43 2015;16(9):1061-70.  
44  
45  
46  
47  
48  
49  
50  
51  
52  
53  
54  
55  
56  
57  
58  
59  
60

- 1  
2  
3  
4  
5  
6  
7  
8  
9  
10  
11  
12  
13  
14  
15  
16  
17  
18  
19  
20  
21  
22  
23  
24  
25  
26  
27  
28  
29  
30  
31  
32  
33  
34  
35  
36  
37  
38  
39  
40  
41  
42  
43  
44  
45  
46  
47  
48  
49  
50  
51  
52  
53  
54  
55  
56  
57  
58  
59  
60
4. Ahmed M, Purushotham AD, Douek M. Novel techniques for sentinel lymph node biopsy in breast cancer: a systematic review. *The Lancet Oncology* 2014;15(8):e351-62.
5. Al Khabori M, de Almeida JR, Guyatt GH, et al. Autologous stem cell transplantation in follicular lymphoma: a systematic review and meta-analysis. *Journal of the National Cancer Institute* 2012;104(1):18-28.
6. Algra AM, Rothwell PM. Effects of regular aspirin on long-term cancer incidence and metastasis: a systematic comparison of evidence from observational studies versus randomised trials. *The Lancet Oncology* 2012;13(5):518-27.
7. Amir E, Seruga B, Niraula S, et al. Toxicity of adjuvant endocrine therapy in postmenopausal breast cancer patients: a systematic review and meta-analysis. *Journal of the National Cancer Institute* 2011;103(17):1299-309.
8. Arbyn M, Verdoodt F, Snijders PJ, et al. Accuracy of human papillomavirus testing on self-collected versus clinician-collected samples: a meta-analysis. *The Lancet Oncology* 2014;15(2):172-83.
9. Aune D, Chan DS, Lau R, et al. Dietary fibre, whole grains, and risk of colorectal cancer: systematic review and dose-response meta-analysis of prospective studies. *BMJ (Clinical research ed)* 2011;343:d6617.
10. Bach, Smith-Bindman R, Wood DE, et al. Benefits and harms of CT screening for lung cancer: a systematic review. *Jama* 2012;307(22):2418-29.

1  
2  
3  
4  
5  
6  
7  
8  
9  
10  
11  
12  
13  
14  
15  
16  
17  
18  
19  
20  
21  
22  
23  
24  
25  
26  
27  
28  
29  
30  
31  
32  
33  
34  
35  
36  
37  
38  
39  
40  
41  
42  
43  
44  
45  
46  
47  
48  
49  
50  
51  
52  
53  
54  
55  
56  
57  
58  
59  
60

11. Baldwin C, Spiro A, Ahern R, et al. Oral nutritional interventions in malnourished patients with cancer: a systematic review and meta-analysis. *Journal of the National Cancer Institute* 2012;104(5):371-85.

12. Ballard-Barbash R, Friedenreich CM, Courneya KS, et al. Physical activity, biomarkers, and disease outcomes in cancer survivors: a systematic review. *Journal of the National Cancer Institute* 2012;104(11):815-40.

13. Bangalore S, Kumar S, Kjeldsen SE, et al. Antihypertensive drugs and risk of cancer: network meta-analyses and trial sequential analyses of 324,168 participants from randomised trials. *The Lancet Oncology* 2011;12(1):65-82.

14. Bao Y, Michaud DS, Spiegelman D, et al. Folate intake and risk of pancreatic cancer: pooled analysis of prospective cohort studies. *Journal of the National Cancer Institute* 2011;103(24):1840-50.

15. Beral V, Gaitskell K, Hermon C, et al. Ovarian cancer and smoking: individual participant meta-analysis including 28,114 women with ovarian cancer from 51 epidemiological studies. *The Lancet Oncology* 2012;13(9):946-56.

16. Beral V, Gaitskell K, Hermon C, et al. Menopausal hormone use and ovarian cancer risk: individual participant meta-analysis of 52 epidemiological studies. *Lancet (London, England)* 2015;385(9980):1835-42.

17. Biagi JJ, Raphael MJ, Mackillop WJ, et al. Association between time to initiation of adjuvant chemotherapy and survival in colorectal cancer: a systematic review and meta-analysis. *Jama* 2011;305(22):2335-42.

- 1  
2  
3  
4  
5  
6 18. Blanchard P, Bourhis J, Lacas B, et al. Taxane-cisplatin-fluorouracil as induction  
7  
8 chemotherapy in locally advanced head and neck cancers: an individual patient data meta-  
9  
10 analysis of the meta-analysis of chemotherapy in head and neck cancer group. *Journal of*  
11  
12 *clinical oncology : official journal of the American Society of Clinical Oncology*  
13  
14 2013;31(23):2854-60.  
15  
16  
17 19. Blanchard P, Lee A, Marguet S, et al. Chemotherapy and radiotherapy in nasopharyngeal  
18  
19 carcinoma: an update of the MAC-NPC meta-analysis. *The Lancet Oncology* 2015;16(6):645-  
20  
21 55.  
22  
23  
24 20. Blanke CD, Bot BM, Thomas DM, et al. Impact of young age on treatment efficacy and  
25  
26 safety in advanced colorectal cancer: a pooled analysis of patients from nine first-line phase  
27  
28 III chemotherapy trials. *Journal of clinical oncology : official journal of the American Society*  
29  
30 *of Clinical Oncology* 2011;29(20):2781-6.  
31  
32  
33 21. Blumenthal GM, Karuri SW, Zhang H, et al. Overall response rate, progression-free  
34  
35 survival, and overall survival with targeted and standard therapies in advanced non-small-  
36  
37 cell lung cancer: US Food and Drug Administration trial-level and patient-level analyses.  
38  
39 *Journal of clinical oncology : official journal of the American Society of Clinical Oncology*  
40  
41 2015;33(9):1008-14.  
42  
43  
44 22. Boehmer U, Cooley TP, Clark MA. Cancer and men who have sex with men: a systematic  
45  
46 review. *The Lancet Oncology* 2012;13(12):e545-53.  
47  
48  
49 23. Bolton KL, Chenevix-Trench G, Goh C, et al. Association between BRCA1 and BRCA2  
50  
51 mutations and survival in women with invasive epithelial ovarian cancer. *Jama*  
52  
53 2012;307(4):382-90.  
54  
55  
56  
57  
58  
59  
60

1  
2  
3  
4  
5  
6  
7  
8  
9  
10  
11  
12  
13  
14  
15  
16  
17  
18  
19  
20  
21  
22  
23  
24  
25  
26  
27  
28  
29  
30  
31  
32  
33  
34  
35  
36  
37  
38  
39  
40  
41  
42  
43  
44  
45  
46  
47  
48  
49  
50  
51  
52  
53  
54  
55  
56  
57  
58  
59  
60

24. Boniol M, Autier P, Boyle P, et al. Cutaneous melanoma attributable to sunbed use: systematic review and meta-analysis. *BMJ (Clinical research ed)* 2012;345:e4757.

25. Bourhis J, Blanchard P, Maillard E, et al. Effect of amifostine on survival among patients treated with radiotherapy: a meta-analysis of individual patient data. *Journal of clinical oncology : official journal of the American Society of Clinical Oncology* 2011;29(18):2590-7.

26. Bowers DC, Nathan PC, Constine L, et al. Subsequent neoplasms of the CNS among survivors of childhood cancer: a systematic review. *The Lancet Oncology* 2013;14(8):e321-8.

27. Boyle T, Keegel T, Bull F, et al. Physical activity and risks of proximal and distal colon cancers: a systematic review and meta-analysis. *Journal of the National Cancer Institute* 2012;104(20):1548-61.

28. Brasme JF, Morfouace M, Grill J, et al. Delays in diagnosis of paediatric cancers: a systematic review and comparison with expert testimony in lawsuits. *The Lancet Oncology* 2012;13(10):e445-59.

29. Brenner H, Stock C, Hoffmeister M. Effect of screening sigmoidoscopy and screening colonoscopy on colorectal cancer incidence and mortality: systematic review and meta-analysis of randomised controlled trials and observational studies. *BMJ (Clinical research ed)* 2014;348:g2467.

30. Breugom AJ, Swets M, Bosset JF, et al. Adjuvant chemotherapy after preoperative (chemo)radiotherapy and surgery for patients with rectal cancer: a systematic review and meta-analysis of individual patient data. *The Lancet Oncology* 2015;16(2):200-7.

1  
2  
3  
4  
5  
6 31. Brinton LA, Cook MB, McCormack V, et al. Anthropometric and hormonal risk factors for  
7 male breast cancer: male breast cancer pooling project results. Journal of the National  
8 Cancer Institute 2014;106(3):djt465.  
9

10  
11  
12  
13 32. Castellsague X, Diaz M, Vaccarella S, et al. Intrauterine device use, cervical infection with  
14 human papillomavirus, and risk of cervical cancer: a pooled analysis of 26 epidemiological  
15 studies. The Lancet Oncology 2011;12(11):1023-31.  
16  
17

18  
19  
20 33. Castillo JJ, Dalia S, Shum H. Meta-analysis of the association between cigarette smoking  
21 and incidence of Hodgkin's Lymphoma. Journal of clinical oncology : official journal of the  
22 American Society of Clinical Oncology 2011;29(29):3900-6.  
23  
24

25  
26 34. Chatzinasiou F, Lill CM, Kypreou K, et al. Comprehensive field synopsis and systematic  
27 meta-analyses of genetic association studies in cutaneous melanoma. Journal of the National  
28 Cancer Institute 2011;103(16):1227-35.  
29  
30

31  
32  
33 35. Chellapandian D, Lehrnbecher T, Phillips B, et al. Bronchoalveolar lavage and lung biopsy  
34 in patients with cancer and hematopoietic stem-cell transplantation recipients: a systematic  
35 review and meta-analysis. Journal of clinical oncology : official journal of the American  
36 Society of Clinical Oncology 2015;33(5):501-9.  
37  
38  
39

40  
41  
42 36. Chen LS, Hung RJ, Baker T, et al. CHRNA5 risk variant predicts delayed smoking cessation  
43 and earlier lung cancer diagnosis--a meta-analysis. Journal of the National Cancer Institute  
44 2015;107(5).  
45  
46  
47  
48  
49  
50  
51  
52  
53  
54



1  
2  
3  
4  
5  
6  
7  
8  
9  
10  
11  
12  
13  
14  
15  
16  
17  
18  
19  
20  
21  
22  
23  
24  
25  
26  
27  
28  
29  
30  
31  
32  
33  
34  
35  
36  
37  
38  
39  
40  
41  
42  
43  
44  
45  
46  
47  
48  
49  
50  
51  
52  
53  
54  
55  
56  
57  
58  
59  
60

37. Choueiri TK, Mayer EL, Je Y, et al. Congestive heart failure risk in patients with breast cancer treated with bevacizumab. *Journal of clinical oncology : official journal of the American Society of Clinical Oncology* 2011;29(6):632-8.

38. Chowdhury R, Kunutsor S, Vitezova A, et al. Vitamin D and risk of cause specific death: systematic review and meta-analysis of observational cohort and randomised intervention studies. *BMJ (Clinical research ed)* 2014;348:g1903.

39. Church DN, Stelloo E, Nout RA, et al. Prognostic significance of POLE proofreading mutations in endometrial cancer. *Journal of the National Cancer Institute* 2015;107(1):402.

40. Coleman R, Powles T, Paterson A, et al. Adjuvant bisphosphonate treatment in early breast cancer: meta-analyses of individual patient data from randomised trials. *Lancet (London, England)* 2015;386(10001):1353-61.

41. Collins M, Wilhelm M, Conyers R, et al. Benefits and adverse events in younger versus older patients receiving neoadjuvant chemotherapy for osteosarcoma: findings from a meta-analysis. *Journal of clinical oncology : official journal of the American Society of Clinical Oncology* 2013;31(18):2303-12.

42. Coory M, White VM, Johnson KS, et al. Systematic review of quality improvement interventions directed at cancer specialists. *Journal of clinical oncology : official journal of the American Society of Clinical Oncology* 2013;31(12):1583-91.

43. Cortazar P, Zhang L, Untch M, et al. Pathological complete response and long-term clinical benefit in breast cancer: the CTNeoBC pooled analysis. *Lancet (London, England)* 2014;384(9938):164-72.

- 1  
2  
3  
4  
5  
6 44. Crowe FL, Appleby PN, Travis RC, et al. Circulating fatty acids and prostate cancer risk:  
7 individual participant meta-analysis of prospective studies. *Journal of the National Cancer*  
8 *Institute* 2014;106(9).  
9  
10  
11  
12  
13 45. Cuzick J, Sestak I, Bonanni B, et al. Selective oestrogen receptor modulators in prevention  
14 of breast cancer: an updated meta-analysis of individual participant data. *Lancet (London,*  
15 *England)* 2013;381(9880):1827-34.  
16  
17  
18  
19  
20 46. Dabestani S, Marconi L, Hofmann F, et al. Local treatments for metastases of renal cell  
21 carcinoma: a systematic review. *The Lancet Oncology* 2014;15(12):e549-61.  
22  
23  
24  
25 47. D'Amico AV, Chen MH, de Castro M, et al. Surrogate endpoints for prostate cancer-  
26 specific mortality after radiotherapy and androgen suppression therapy in men with  
27 localised or locally advanced prostate cancer: an analysis of two randomised trials. *The*  
28 *Lancet Oncology* 2012;13(2):189-95.  
29  
30  
31  
32  
33 48. Darby S, McGale P, Correa C, et al. Effect of radiotherapy after breast-conserving surgery  
34 on 10-year recurrence and 15-year breast cancer death: meta-analysis of individual patient  
35 data for 10,801 women in 17 randomised trials. *Lancet (London, England)*  
36 2011;378(9804):1707-16.  
37  
38  
39  
40  
41  
42 49. Davies C, Godwin J, Gray R, et al. Relevance of breast cancer hormone receptors and  
43 other factors to the efficacy of adjuvant tamoxifen: patient-level meta-analysis of  
44 randomised trials. *Lancet (London, England)* 2011;378(9793):771-84.  
45  
46  
47  
48  
49 50. de Jong MC, Kors WA, de Graaf P, et al. Trilateral retinoblastoma: a systematic review  
50 and meta-analysis. *The Lancet Oncology* 2014;15(10):1157-67.  
51  
52  
53  
54  
55  
56  
57  
58  
59  
60

1  
2  
3  
4  
5  
6  
7  
8  
9  
10  
11  
12  
13  
14  
15  
16  
17  
18  
19  
20  
21  
22  
23  
24  
25  
26  
27  
28  
29  
30  
31  
32  
33  
34  
35  
36  
37  
38  
39  
40  
41  
42  
43  
44  
45  
46  
47  
48  
49  
50  
51  
52  
53  
54  
55  
56  
57  
58  
59  
60

51. De Witt Hamer PC, Robles SG, Zwinderman AH, et al. Impact of intraoperative stimulation brain mapping on glioma surgery outcome: a meta-analysis. *Journal of clinical oncology : official journal of the American Society of Clinical Oncology* 2012;30(20):2559-65.

52. Deppen SA, Blume JD, Kensinger CD, et al. Accuracy of FDG-PET to diagnose lung cancer in areas with infectious lung disease: a meta-analysis. *Jama* 2014;312(12):1227-36.

53. Di Leo A, Desmedt C, Bartlett JM, et al. HER2 and TOP2A as predictive markers for anthracycline-containing chemotherapy regimens as adjuvant treatment of breast cancer: a meta-analysis of individual patient data. *The Lancet Oncology* 2011;12(12):1134-42.

54. DiSipio T, Rye S, Newman B, et al. Incidence of unilateral arm lymphoedema after breast cancer: a systematic review and meta-analysis. *The Lancet Oncology* 2013;14(6):500-15.

55. dos Santos LV, Souza FH, Brunetto AT, et al. Neurokinin-1 receptor antagonists for chemotherapy-induced nausea and vomiting: a systematic review. *Journal of the National Cancer Institute* 2012;104(17):1280-92.

56. Dowsett M, Forbes JF, Bradley R, et al. Aromatase inhibitors versus tamoxifen in early breast cancer: patient-level meta-analysis of the randomised trials. *Lancet (London, England)* 2015;386(10001):1341-52.

57. Eisen T, Sternberg CN, Robert C, et al. Targeted therapies for renal cell carcinoma: review of adverse event management strategies. *Journal of the National Cancer Institute* 2012;104(2):93-113.

- 1  
2  
3  
4  
5  
6 58. Eliassen AH, Hendrickson SJ, Brinton LA, et al. Circulating carotenoids and risk of breast  
7 cancer: pooled analysis of eight prospective studies. *Journal of the National Cancer Institute*  
8 2012;104(24):1905-16.  
9  
10  
11  
12  
13 59. Engelhardt EG, Garvelink MM, de Haes JH, et al. Predicting and communicating the risk of  
14 recurrence and death in women with early-stage breast cancer: a systematic review of risk  
15 prediction models. *Journal of clinical oncology : official journal of the American Society of*  
16 *Clinical Oncology* 2014;32(3):238-50. doi: 10.1200/jco.2013.50.3417  
17  
18  
19  
20  
21  
22 60. Faller H, Schuler M, Richard M, et al. Effects of psycho-oncologic interventions on  
23 emotional distress and quality of life in adult patients with cancer: systematic review and  
24 meta-analysis. *Journal of clinical oncology : official journal of the American Society of Clinical*  
25 *Oncology* 2013;31(6):782-93.  
26  
27  
28  
29  
30  
31 61. Fokom-Domgue J, Combescure C, Fokom-Defo V, et al. Performance of alternative  
32 strategies for primary cervical cancer screening in sub-Saharan Africa: systematic review and  
33 meta-analysis of diagnostic test accuracy studies. *BMJ (Clinical research ed)* 2015;351:h3084.  
34  
35  
36  
37  
38 62. Fong DY, Ho JW, Hui BP, et al. Physical activity for cancer survivors: meta-analysis of  
39 randomised controlled trials. *BMJ (Clinical research ed)* 2012;344:e70.  
40  
41  
42  
43 63. Ford AC, Forman D, Hunt RH, et al. Helicobacter pylori eradication therapy to prevent  
44 gastric cancer in healthy asymptomatic infected individuals: systematic review and meta-  
45 analysis of randomised controlled trials. *BMJ (Clinical research ed)* 2014;348:g3174.  
46  
47  
48  
49  
50  
51  
52  
53  
54

1  
2  
3  
4  
5  
6  
7  
8  
9  
10  
11  
12  
13  
14  
15  
16  
17  
18  
19  
20  
21  
22  
23  
24  
25  
26  
27  
28  
29  
30  
31  
32  
33  
34  
35  
36  
37  
38  
39  
40  
41  
42  
43  
44  
45  
46  
47  
48  
49  
50  
51  
52  
53  
54  
55  
56  
57  
58  
59  
60

64. Freese KE, Kokai L, Edwards RP, et al. Adipose-derived stems cells and their role in human cancer development, growth, progression, and metastasis: a systematic review. *Cancer research* 2015;75(7):1161-8.

65. Friebel TM, Domchek SM, Rebbeck TR. Modifiers of cancer risk in BRCA1 and BRCA2 mutation carriers: systematic review and meta-analysis. *Journal of the National Cancer Institute* 2014;106(6):dju091.

66. Garcia MK, McQuade J, Haddad R, et al. Systematic review of acupuncture in cancer care: a synthesis of the evidence. *Journal of clinical oncology : official journal of the American Society of Clinical Oncology* 2013;31(7):952-60.

67. Gardner JR, Livingston PM, Fraser SF. Effects of exercise on treatment-related adverse effects for patients with prostate cancer receiving androgen-deprivation therapy: a systematic review. *Journal of clinical oncology : official journal of the American Society of Clinical Oncology* 2014;32(4):335-46.

68. Gennari A, Stockler M, Puntoni M, et al. Duration of chemotherapy for metastatic breast cancer: a systematic review and meta-analysis of randomized clinical trials. *Journal of clinical oncology : official journal of the American Society of Clinical Oncology* 2011;29(16):2144-9.

69. Ghesquieres H, Slager SL, Jardin F, et al. Genome-Wide Association Study of Event-Free Survival in Diffuse Large B-Cell Lymphoma Treated With Immunochemotherapy. *Journal of clinical oncology : official journal of the American Society of Clinical Oncology* 2015;33(33):3930-7.

1  
2  
3  
4  
5  
6 70. Greco MT, Roberto A, Corli O, et al. Quality of cancer pain management: an update of a  
7  
8 systematic review of undertreatment of patients with cancer. *Journal of clinical oncology* :  
9  
10 official journal of the American Society of Clinical Oncology 2014;32(36):4149-54.  
11

12  
13 71. Green J, Cairns BJ, Casabonne D, et al. Height and cancer incidence in the Million Women  
14  
15 Study: prospective cohort, and meta-analysis of prospective studies of height and total  
16  
17 cancer risk. *The Lancet Oncology* 2011;12(8):785-94.  
18

19  
20 72. Gupta S, Hunsberger S, Boerner SA, et al. Meta-analysis of the relationship between dose  
21  
22 and benefit in phase I targeted agent trials. *Journal of the National Cancer Institute*  
23  
24 2012;104(24):1860-6.  
25

26  
27 73. Hamaker ME, Jonker JM, de Rooij SE, et al. Frailty screening methods for predicting  
28  
29 outcome of a comprehensive geriatric assessment in elderly patients with cancer: a  
30  
31 systematic review. *The Lancet Oncology* 2012;13(10):e437-44.  
32

33  
34 74. Hart SL, Hoyt MA, Diefenbach M, et al. Meta-analysis of efficacy of interventions for  
35  
36 elevated depressive symptoms in adults diagnosed with cancer. *Journal of the National*  
37  
38 *Cancer Institute* 2012;104(13):990-1004.  
39

40  
41 75. Hayes JH, Barry MJ. Screening for prostate cancer with the prostate-specific antigen test:  
42  
43 a review of current evidence. *Jama* 2014;311(11):1143-9.  
44

45  
46 76. Heikkila K, Nyberg ST, Theorell T, et al. Work stress and risk of cancer: meta-analysis of  
47  
48 5700 incident cancer events in 116,000 European men and women. *BMJ (Clinical research*  
49  
50 *ed)* 2013;346:f165.  
51

1  
2  
3  
4  
5  
6  
7  
8  
9  
10  
11  
12  
13  
14  
15  
16  
17  
18  
19  
20  
21  
22  
23  
24  
25  
26  
27  
28  
29  
30  
31  
32  
33  
34  
35  
36  
37  
38  
39  
40  
41  
42  
43  
44  
45  
46  
47  
48  
49  
50  
51  
52  
53  
54  
55  
56  
57  
58  
59  
60

77. Heine JJ, Scott CG, Sellers TA, et al. A novel automated mammographic density measure and breast cancer risk. *Journal of the National Cancer Institute* 2012;104(13):1028-37.

78. Heleno B, Thomsen MF, Rodrigues DS, et al. Quantification of harms in cancer screening trials: literature review. *BMJ (Clinical research ed)* 2013;347:f5334.

79. Henson KE, Jaggi R, Cutter D, et al. Inferring the Effects of Cancer Treatment: Divergent Results From Early Breast Cancer Trialists' Collaborative Group Meta-Analyses of Randomized Trials and Observational Data From SEER Registries. *Journal of clinical oncology : official journal of the American Society of Clinical Oncology* 2016.

80. Henson LA, Gao W, Higginson IJ, et al. Emergency department attendance by patients with cancer in their last month of life: a systematic review and meta-analysis. *Journal of clinical oncology : official journal of the American Society of Clinical Oncology* 2015;33(4):370-6.

81. Hills RK, Castaigne S, Appelbaum FR, et al. Addition of gemtuzumab ozogamicin to induction chemotherapy in adult patients with acute myeloid leukaemia: a meta-analysis of individual patient data from randomised controlled trials. *The Lancet Oncology* 2014;15(9):986-96.

82. Hollevoet K, Reitsma JB, Creaney J, et al. Serum mesothelin for diagnosing malignant pleural mesothelioma: an individual patient data meta-analysis. *Journal of clinical oncology : official journal of the American Society of Clinical Oncology* 2012;30(13):1541-9.

- 1  
2  
3  
4  
5  
6 83. Horgan AM, Amir E, Walter T, et al. Adjuvant therapy in the treatment of biliary tract  
7  
8 cancer: a systematic review and meta-analysis. *Journal of clinical oncology : official journal of*  
9  
10 the American Society of Clinical Oncology 2012;30(16):1934-40.  
11  
12  
13 84. Hornberger J, Alvarado MD, Rebecca C, et al. Clinical validity/utility, change in practice  
14  
15 patterns, and economic implications of risk stratifiers to predict outcomes for early-stage  
16  
17 breast cancer: a systematic review. *Journal of the National Cancer Institute*  
18  
19 2012;104(14):1068-79.  
20  
21  
22 85. Horowitz NA, Benyamini N, Wohlfart K, et al. Reproductive organ involvement in non-  
23  
24 Hodgkin lymphoma during pregnancy: a systematic review. *The Lancet Oncology*  
25  
26 2013;14(7):e275-82.  
27  
28  
29 86. Houssami N, Turner R, Macaskill P, et al. An individual person data meta-analysis of  
30  
31 preoperative magnetic resonance imaging and breast cancer recurrence. *Journal of clinical*  
32  
33 *oncology : official journal of the American Society of Clinical Oncology* 2014;32(5):392-401.  
34  
35  
36 87. Howard-Anderson J, Ganz PA, Bower JE, et al. Quality of life, fertility concerns, and  
37  
38 behavioral health outcomes in younger breast cancer survivors: a systematic review. *Journal*  
39  
40 *of the National Cancer Institute* 2012;104(5):386-405.  
41  
42  
43 88. Hurwitz HI, Saltz LB, Van Cutsem E, et al. Venous thromboembolic events with  
44  
45 chemotherapy plus bevacizumab: a pooled analysis of patients in randomized phase II and III  
46  
47 studies. *Journal of clinical oncology : official journal of the American Society of Clinical*  
48  
49 *Oncology* 2011;29(13):1757-64.  
50  
51  
52  
53  
54  
55  
56  
57  
58  
59  
60



1  
2  
3  
4  
5  
6  
7  
8  
9  
10  
11  
12  
13  
14  
15  
16  
17  
18  
19  
20  
21  
22  
23  
24  
25  
26  
27  
28  
29  
30  
31  
32  
33  
34  
35  
36  
37  
38  
39  
40  
41  
42  
43  
44  
45  
46  
47  
48  
49  
50  
51  
52  
53  
54  
55  
56  
57  
58  
59  
60

89. Jenkins MA, Dowty JG, Ait Ouakrim D, et al. Short-term risk of colorectal cancer in individuals with lynch syndrome: a meta-analysis. *Journal of clinical oncology : official journal of the American Society of Clinical Oncology* 2015;33(4):326-31.

90. Jim HS, Phillips KM, Chait S, et al. Meta-analysis of cognitive functioning in breast cancer survivors previously treated with standard-dose chemotherapy. *Journal of clinical oncology : official journal of the American Society of Clinical Oncology* 2012;30(29):3578-87.

91. Joensuu H, Vehtari A, Riihimaki J, et al. Risk of recurrence of gastrointestinal stromal tumour after surgery: an analysis of pooled population-based cohorts. *The Lancet Oncology* 2012;13(3):265-74.

92. Jung S, Spiegelman D, Baglietto L, et al. Fruit and vegetable intake and risk of breast cancer by hormone receptor status. *Journal of the National Cancer Institute* 2013;105(3):219-36.

93. Kamangar F, Shakeri R, Malekzadeh R, et al. Opium use: an emerging risk factor for cancer? *The Lancet Oncology* 2014;15(2):e69-77.

94. Keum N, Greenwood DC, Lee DH, et al. Adult weight gain and adiposity-related cancers: a dose-response meta-analysis of prospective observational studies. *Journal of the National Cancer Institute* 2015;107(2).

95. Kiely BE, Soon YY, Tattersall MH, et al. How long have I got? Estimating typical, best-case, and worst-case scenarios for patients starting first-line chemotherapy for metastatic breast cancer: a systematic review of recent randomized trials. *Journal of clinical oncology : official journal of the American Society of Clinical Oncology* 2011;29(4):456-63.

- 1  
2  
3  
4  
5  
6 96. Knoll GA, Kokolo MB, Mallick R, et al. Effect of sirolimus on malignancy and survival after  
7 kidney transplantation: systematic review and meta-analysis of individual patient data. BMJ  
8 (Clinical research ed) 2014;349:g6679.  
9  
10  
11  
12 97. Kolahdooz F, Jang SL, Corriveau A, et al. Knowledge, attitudes, and behaviours towards  
13 cancer screening in indigenous populations: a systematic review. The Lancet Oncology  
14 2014;15(11):e504-16.  
15  
16  
17 98. Kong A, Johnson N, Kitchener HC, et al. Adjuvant radiotherapy for stage I endometrial  
18 cancer: an updated Cochrane systematic review and meta-analysis. Journal of the National  
19 Cancer Institute 2012;104(21):1625-34.  
20  
21  
22 99. Kotecha RS, Pascoe EM, Rushing EJ, et al. Meningiomas in children and adolescents: a  
23 meta-analysis of individual patient data. The Lancet Oncology 2011;12(13):1229-39.  
24  
25  
26 100. Kotronoulas G, Kearney N, Maguire R, et al. What is the value of the routine use of  
27 patient-reported outcome measures toward improvement of patient outcomes, processes of  
28 care, and health service outcomes in cancer care? A systematic review of controlled trials.  
29 Journal of clinical oncology : official journal of the American Society of Clinical Oncology  
30 2014;32(14):1480-501.  
31  
32  
33 101. Kubben PL, ter Meulen KJ, Schijns OE, et al. Intraoperative MRI-guided resection of  
34 glioblastoma multiforme: a systematic review. The Lancet Oncology 2011;12(11):1062-70.  
35  
36  
37 102. Kumar N, Chen Y, Zaw AS, et al. Use of intraoperative cell-salvage for autologous blood  
38 transfusions in metastatic spine tumour surgery: a systematic review. The Lancet Oncology  
39 2014;15(1):e33-41.  
40  
41  
42  
43  
44  
45  
46  
47  
48  
49  
50  
51  
52  
53  
54  
55  
56  
57  
58  
59  
60

1  
2  
3  
4  
5  
6  
7  
8  
9  
10  
11  
12  
13  
14  
15  
16  
17  
18  
19  
20  
21  
22  
23  
24  
25  
26  
27  
28  
29  
30  
31  
32  
33  
34  
35  
36  
37  
38  
39  
40  
41  
42  
43  
44  
45  
46  
47  
48  
49  
50  
51  
52  
53  
54  
55  
56  
57  
58  
59  
60

103. Kyrgiou M, Mitra A, Arbyn M, et al. Fertility and early pregnancy outcomes after treatment for cervical intraepithelial neoplasia: systematic review and meta-analysis. *BMJ (Clinical research ed)* 2014;349:g6192.

104. Lallas A, Kyrgidis A, Ferrara G, et al. Atypical Spitz tumours and sentinel lymph node biopsy: a systematic review. *The Lancet Oncology* 2014;15(4):e178-83.

105. Lansbury L, Bath-Hextall F, Perkins W, et al. Interventions for non-metastatic squamous cell carcinoma of the skin: systematic review and pooled analysis of observational studies. *BMJ (Clinical research ed)* 2013;347:f6153.

106. Laurie SA, Ho AL, Fury MG, et al. Systemic therapy in the management of metastatic or locally recurrent adenoid cystic carcinoma of the salivary glands: a systematic review. *The Lancet Oncology* 2011;12(8):815-24.

107. Lavigne E, Holowaty EJ, Pan SY, et al. Breast cancer detection and survival among women with cosmetic breast implants: systematic review and meta-analysis of observational studies. *BMJ (Clinical research ed)* 2013;346:f2399.

108. Lee CK, Brown C, Gralla RJ, et al. Impact of EGFR inhibitor in non-small cell lung cancer on progression-free and overall survival: a meta-analysis. *Journal of the National Cancer Institute* 2013;105(9):595-605.

109. Lee CK, Wu YL, Ding PN, et al. Impact of Specific Epidermal Growth Factor Receptor (EGFR) Mutations and Clinical Characteristics on Outcomes After Treatment With EGFR Tyrosine Kinase Inhibitors Versus Chemotherapy in EGFR-Mutant Lung Cancer: A Meta-

1  
2  
3  
4  
5  
6 Analysis. *Journal of clinical oncology : official journal of the American Society of Clinical*  
7  
8 *Oncology* 2015;33(17):1958-65.  
9

10  
11 110. Lee JK, Hahn S, Kim DW, et al. Epidermal growth factor receptor tyrosine kinase  
12  
13 inhibitors vs conventional chemotherapy in non-small cell lung cancer harboring wild-type  
14  
15 epidermal growth factor receptor: a meta-analysis. *Jama* 2014;311(14):1430-7.  
16

17  
18 111. Lee L, Cheung WY, Atkinson E, et al. Impact of comorbidity on chemotherapy use and  
19  
20 outcomes in solid tumors: a systematic review. *Journal of clinical oncology : official journal of*  
21  
22 *the American Society of Clinical Oncology* 2011;29(1):106-17.  
23

24  
25 112. Lee SJ, Boscardin WJ, Stijacic-Cenzer I, et al. Time lag to benefit after screening for  
26  
27 breast and colorectal cancer: meta-analysis of survival data from the United States, Sweden,  
28  
29 United Kingdom, and Denmark. *BMJ (Clinical research ed)* 2013;346:e8441.  
30

31  
32 113. Liao WC, Chien KL, Lin YL, et al. Adjuvant treatments for resected pancreatic  
33  
34 adenocarcinoma: a systematic review and network meta-analysis. *The Lancet Oncology*  
35  
36 2013;14(11):1095-103.  
37

38  
39 114. Liao WC, Tu YK, Wu MS, et al. Blood glucose concentration and risk of pancreatic  
40  
41 cancer: systematic review and dose-response meta-analysis. *BMJ (Clinical research ed)*  
42  
43 2015;349:g7371.  
44

45  
46 115. Lippitz BE. Cytokine patterns in patients with cancer: a systematic review. *The Lancet*  
47  
48 *Oncology* 2013;14(6):e218-28.  
49

- 1  
2  
3  
4  
5  
6 116. Lopez-Olivo MA, Tayar JH, Martinez-Lopez JA, et al. Risk of malignancies in patients with  
7  
8 rheumatoid arthritis treated with biologic therapy: a meta-analysis. *Jama* 2012;308(9):898-  
9  
10 908.  
11  
12  
13 117. Lockett T, Goldstein D, Butow PN, et al. Psychological morbidity and quality of life of  
14  
15 ethnic minority patients with cancer: a systematic review and meta-analysis. *The Lancet*  
16  
17 *Oncology* 2011;12(13):1240-8.  
18  
19  
20 118. Ma Y, Zhang P, Wang F, et al. Association between vitamin D and risk of colorectal  
21  
22 cancer: a systematic review of prospective studies. *Journal of clinical oncology : official*  
23  
24 *journal of the American Society of Clinical Oncology* 2011;29(28):3775-82.  
25  
26  
27 119. Machalek DA, Poynten M, Jin F, et al. Anal human papillomavirus infection and  
28  
29 associated neoplastic lesions in men who have sex with men: a systematic review and meta-  
30  
31 analysis. *The Lancet Oncology* 2012;13(5):487-500.  
32  
33  
34 120. Mak RH, Hunt D, Shipley WU, et al. Long-term outcomes in patients with muscle-  
35  
36 invasive bladder cancer after selective bladder-preserving combined-modality therapy: a  
37  
38 pooled analysis of Radiation Therapy Oncology Group protocols 8802, 8903, 9506, 9706,  
39  
40 9906, and 0233. *Journal of clinical oncology : official journal of the American Society of*  
41  
42 *Clinical Oncology* 2014;32(34):3801-9.  
43  
44  
45 121. Maltoni M, Scarpi E, Rosati M, et al. Palliative sedation in end-of-life care and survival: a  
46  
47 systematic review. *Journal of clinical oncology : official journal of the American Society of*  
48  
49 *Clinical Oncology* 2012;30(12):1378-83.  
50  
51  
52  
53  
54  
55  
56  
57  
58  
59  
60

1  
2  
3  
4  
5  
6 122. Manceau G, Karoui M, Werner A, et al. Comparative outcomes of rectal cancer surgery  
7  
8 between elderly and non-elderly patients: a systematic review. *The Lancet Oncology*  
9  
10 2012;13(12):e525-36.  
11

12  
13 123. Marinovich ML, Houssami N, Macaskill P, et al. Meta-analysis of magnetic resonance  
14  
15 imaging in detecting residual breast cancer after neoadjuvant therapy. *Journal of the*  
16  
17 *National Cancer Institute* 2013;105(5):321-33.  
18

19  
20 124. Markar SR, Wiggins T, Ni M, et al. Assessment of the quality of surgery within  
21  
22 randomised controlled trials for the treatment of gastro-oesophageal cancer: a systematic  
23  
24 review. *The Lancet Oncology* 2015;16(1):e23-31.  
25

26  
27 125. Martin-Doyle W, Leow JJ, Orsola A, et al. Improving selection criteria for early  
28  
29 cystectomy in high-grade t1 bladder cancer: a meta-analysis of 15,215 patients. *Journal of*  
30  
31 *clinical oncology : official journal of the American Society of Clinical Oncology*  
32  
33 2015;33(6):643-50.  
34

35  
36 126. Manguen A, Le Pechoux C, Saunders MI, et al. Hyperfractionated or accelerated  
37  
38 radiotherapy in lung cancer: an individual patient data meta-analysis. *Journal of clinical*  
39  
40 *oncology : official journal of the American Society of Clinical Oncology* 2012;30(22):2788-97.  
41

42  
43 127. McGale P, Taylor C, Correa C, et al. Effect of radiotherapy after mastectomy and axillary  
44  
45 surgery on 10-year recurrence and 20-year breast cancer mortality: meta-analysis of  
46  
47 individual patient data for 8135 women in 22 randomised trials. *Lancet (London, England)*  
48  
49 2014;383(9935):2127-35.  
50

1  
2  
3  
4  
5  
6  
7  
8  
9  
10  
11  
12  
13  
14  
15  
16  
17  
18  
19  
20  
21  
22  
23  
24  
25  
26  
27  
28  
29  
30  
31  
32  
33  
34  
35  
36  
37  
38  
39  
40  
41  
42  
43  
44  
45  
46  
47  
48  
49  
50  
51  
52  
53  
54  
55  
56  
57  
58  
59  
60

128. Meulendijks D, Henricks LM, Sonke GS, et al. Clinical relevance of DPYD variants c.1679T>G, c.1236G>A/HapB3, and c.1601G>A as predictors of severe fluoropyrimidine-associated toxicity: a systematic review and meta-analysis of individual patient data. *The Lancet Oncology* 2015;16(16):1639-50.

129. Mitchell AJ, Chan M, Bhatti H, et al. Prevalence of depression, anxiety, and adjustment disorder in oncological, haematological, and palliative-care settings: a meta-analysis of 94 interview-based studies. *The Lancet Oncology* 2011;12(2):160-74.

130. Mitchell AJ, Ferguson DW, Gill J, et al. Depression and anxiety in long-term cancer survivors compared with spouses and healthy controls: a systematic review and meta-analysis. *The Lancet Oncology* 2013;14(8):721-32.

131. Mocellin S, Pilati P, Briarava M, et al. Breast Cancer Chemoprevention: A Network Meta-Analysis of Randomized Controlled Trials. *Journal of the National Cancer Institute* 2016;108(2).

132. Mocellin S, Verdi D, Pooley KA, et al. Telomerase reverse transcriptase locus polymorphisms and cancer risk: a field synopsis and meta-analysis. *Journal of the National Cancer Institute* 2012;104(11):840-54.

133. Moorman PG, Havrilesky LJ, Gierisch JM, et al. Oral contraceptives and risk of ovarian cancer and breast cancer among high-risk women: a systematic review and meta-analysis. *Journal of clinical oncology : official journal of the American Society of Clinical Oncology* 2013;31(33):4188-98.

- 1  
2  
3  
4  
5  
6  
7 134. Myers ER, Moorman P, Gierisch JM, et al. Benefits and Harms of Breast Cancer  
8 Screening: A Systematic Review. *Jama* 2015;314(15):1615-34.  
9  
10  
11 135. Nagayama A, Hayashida T, Jinno H, et al. Comparative effectiveness of neoadjuvant  
12 therapy for HER2-positive breast cancer: a network meta-analysis. *Journal of the National*  
13 *Cancer Institute* 2014;106(9).  
14  
15  
16  
17 136. Nair VS, Maeda LS, Ioannidis JP. Clinical outcome prediction by microRNAs in human  
18 cancer: a systematic review. *Journal of the National Cancer Institute* 2012;104(7):528-40.  
19  
20  
21  
22 137. Ndiaye C, Mena M, Alemany L, et al. HPV DNA, E6/E7 mRNA, and p16INK4a detection in  
23 head and neck cancers: a systematic review and meta-analysis. *The Lancet Oncology*  
24 *2014;15(12):1319-31.*  
25  
26  
27  
28  
29 138. Nguyen PL, Je Y, Schutz FA, et al. Association of androgen deprivation therapy with  
30 cardiovascular death in patients with prostate cancer: a meta-analysis of randomized trials.  
31 *Jama* 2011;306(21):2359-66.  
32  
33  
34  
35  
36 139. Niraula S, Amir E, Vera-Badillo F, et al. Risk of incremental toxicities and associated  
37 costs of new anticancer drugs: a meta-analysis. *Journal of clinical oncology : official journal*  
38 *of the American Society of Clinical Oncology* 2014;32(32):3634-42.  
39  
40  
41  
42 140. Niraula S, Le LW, Tannock IF. Treatment of prostate cancer with intermittent versus  
43 continuous androgen deprivation: a systematic review of randomized trials. *Journal of*  
44 *clinical oncology : official journal of the American Society of Clinical Oncology*  
45 *2013;31(16):2029-36.*  
46  
47  
48  
49  
50  
51  
52  
53  
54  
55  
56  
57  
58  
59  
60



- 1  
2  
3  
4  
5  
6 141. Niraula S, Seruga B, Ocana A, et al. The price we pay for progress: a meta-analysis of  
7 harms of newly approved anticancer drugs. *Journal of clinical oncology : official journal of*  
8  
9 the American Society of Clinical Oncology 2012;30(24):3012-9.  
10  
11  
12  
13 142. Oba K, Paoletti X, Alberts S, et al. Disease-free survival as a surrogate for overall survival  
14 in adjuvant trials of gastric cancer: a meta-analysis. *Journal of the National Cancer Institute*  
15  
16 2013;105(21):1600-7.  
17  
18  
19  
20 143. Ocana A, Vera-Badillo F, Seruga B, et al. HER3 overexpression and survival in solid  
21 tumors: a meta-analysis. *Journal of the National Cancer Institute* 2013;105(4):266-73.  
22  
23  
24  
25 144. Ohri N, Shen X, Dicker AP, et al. Radiotherapy protocol deviations and clinical outcomes:  
26 a meta-analysis of cooperative group clinical trials. *Journal of the National Cancer Institute*  
27  
28 2013;105(6):387-93.  
29  
30  
31 145. Oostendorp LJ, Stalmeier PF, Donders AR, et al. Efficacy and safety of palliative  
32 chemotherapy for patients with advanced breast cancer pretreated with anthracyclines and  
33 taxanes: a systematic review. *The Lancet Oncology* 2011;12(11):1053-61.  
34  
35  
36  
37  
38 146. O'Sullivan CC, Bradbury I, Campbell C, et al. Efficacy of Adjuvant Trastuzumab for  
39 Patients With Human Epidermal Growth Factor Receptor 2-Positive Early Breast Cancer and  
40 Tumors  $\leq$  2 cm: A Meta-Analysis of the Randomized Trastuzumab Trials. *Journal of clinical*  
41  
42 oncology : official journal of the American Society of Clinical Oncology 2015;33(24):2600-8.  
43  
44  
45  
46  
47 147. Pace LE, Keating NL. A systematic assessment of benefits and risks to guide breast  
48 cancer screening decisions. *Jama* 2014;311(13):1327-35.  
49  
50  
51  
52  
53  
54  
55  
56  
57  
58  
59  
60

1  
2  
3  
4  
5  
6 148. Palumbo A, Bringhen S, Kumar SK, et al. Second primary malignancies with lenalidomide  
7 therapy for newly diagnosed myeloma: a meta-analysis of individual patient data. The Lancet  
8 Oncology 2014;15(3):333-42.  
9  
10

11  
12  
13 149. Patel SH, Wang Z, Wong WW, et al. Charged particle therapy versus photon therapy for  
14 paranasal sinus and nasal cavity malignant diseases: a systematic review and meta-analysis.  
15 The Lancet Oncology 2014;15(9):1027-38.  
16  
17

18  
19  
20 150. Peairs KS, Barone BB, Snyder CF, et al. Diabetes mellitus and breast cancer outcomes: a  
21 systematic review and meta-analysis. Journal of clinical oncology : official journal of the  
22 American Society of Clinical Oncology 2011;29(1):40-6.  
23  
24

25  
26  
27 151. Pearce CL, Templeman C, Rossing MA, et al. Association between endometriosis and  
28 risk of histological subtypes of ovarian cancer: a pooled analysis of case-control studies. The  
29 Lancet Oncology 2012;13(4):385-94.  
30  
31

32  
33  
34 152. Peto R, Davies C, Godwin J, et al. Comparisons between different polychemotherapy  
35 regimens for early breast cancer: meta-analyses of long-term outcome among 100,000  
36 women in 123 randomised trials. Lancet (London, England) 2012;379(9814):432-44.  
37  
38

39  
40  
41 153. Pettersson A, Graff RE, Ursin G, et al. Mammographic density phenotypes and risk of  
42 breast cancer: a meta-analysis. Journal of the National Cancer Institute 2014;106(5).  
43  
44

45  
46  
47 154. Phi XA, Houssami N, Obdeijn IM, et al. Magnetic resonance imaging improves breast  
48 screening sensitivity in BRCA mutation carriers age  $\geq$  50 years: evidence from an individual  
49 patient data meta-analysis. Journal of clinical oncology : official journal of the American  
50 Society of Clinical Oncology 2015;33(4):349-56.  
51  
52

1  
2  
3  
4  
5  
6  
7  
8  
9  
10  
11  
12  
13  
14  
15  
16  
17  
18  
19  
20  
21  
22  
23  
24  
25  
26  
27  
28  
29  
30  
31  
32  
33  
34  
35  
36  
37  
38  
39  
40  
41  
42  
43  
44  
45  
46  
47  
48  
49  
50  
51  
52  
53  
54  
55  
56  
57  
58  
59  
60

155. Pilarski R, Burt R, Kohlman W, et al. Cowden syndrome and the PTEN hamartoma tumor syndrome: systematic review and revised diagnostic criteria. *Journal of the National Cancer Institute* 2013;105(21):1607-16.

156. Playdon MC, Bracken MB, Sanft TB, et al. Weight Gain After Breast Cancer Diagnosis and All-Cause Mortality: Systematic Review and Meta-Analysis. *Journal of the National Cancer Institute* 2015;107(12):djv275.

157. Potter S, Brigid A, Whiting PF, et al. Reporting clinical outcomes of breast reconstruction: a systematic review. *Journal of the National Cancer Institute* 2011;103(1):31-46.

158. Proverbs-Singh T, Chiu SK, Liu Z, et al. Arterial thromboembolism in cancer patients treated with cisplatin: a systematic review and meta-analysis. *Journal of the National Cancer Institute* 2012;104(23):1837-40.

159. Puts MT, Hardt J, Monette J, et al. Use of geriatric assessment for older adults in the oncology setting: a systematic review. *Journal of the National Cancer Institute* 2012;104(15):1133-63.

160. Raaschou-Nielsen O, Andersen ZJ, Beelen R, et al. Air pollution and lung cancer incidence in 17 European cohorts: prospective analyses from the European Study of Cohorts for Air Pollution Effects (ESCAPE). *The Lancet Oncology* 2013;14(9):813-22.

161. Rahbari NN, Bork U, Motschall E, et al. Molecular detection of tumor cells in regional lymph nodes is associated with disease recurrence and poor survival in node-negative

1  
2  
3  
4  
5  
6 colorectal cancer: a systematic review and meta-analysis. Journal of clinical oncology :  
7 official journal of the American Society of Clinical Oncology 2012;30(1):60-70.

10  
11 162. Ranpura V, Hapani S, Wu S. Treatment-related mortality with bevacizumab in cancer  
12 patients: a meta-analysis. Jama 2011;305(5):487-94.

15  
16 163. Rao R, Euhus D, Mayo HG, et al. Axillary node interventions in breast cancer: a  
17 systematic review. Jama 2013;310(13):1385-94.

20  
21 164. Rebolj M, Bonde J, Njor SH, et al. Human papillomavirus testing in primary cervical  
22 screening and the cut-off level for hybrid capture 2 tests: systematic review. BMJ (Clinical  
23 research ed) 2011;342:d2757.

26  
27 165. Richards CJ, Je Y, Schutz FA, et al. Incidence and risk of congestive heart failure in  
28 patients with renal and nonrenal cell carcinoma treated with sunitinib. Journal of clinical  
29 oncology : official journal of the American Society of Clinical Oncology 2011;29(25):3450-6.

32  
33 166. Riester M, Wei W, Waldron L, et al. Risk prediction for late-stage ovarian cancer by  
34 meta-analysis of 1525 patient samples. Journal of the National Cancer Institute 2014;106(5).

37  
38 167. Rooney AG, Carson A, Grant R. Depression in cerebral glioma patients: a systematic  
39 review of observational studies. Journal of the National Cancer Institute 2011;103(1):61-76.

42  
43 168. Rosmarin D, Palles C, Church D, et al. Genetic markers of toxicity from capecitabine and  
44 other fluorouracil-based regimens: investigation in the QUASAR2 study, systematic review,  
45 and meta-analysis. Journal of clinical oncology : official journal of the American Society of  
46 Clinical Oncology 2014;32(10):1031-9.

1  
2  
3  
4  
5  
6  
7  
8  
9  
10  
11  
12  
13  
14  
15  
16  
17  
18  
19  
20  
21  
22  
23  
24  
25  
26  
27  
28  
29  
30  
31  
32  
33  
34  
35  
36  
37  
38  
39  
40  
41  
42  
43  
44  
45  
46  
47  
48  
49  
50  
51  
52  
53  
54  
55  
56  
57  
58  
59  
60

169. Rossi A, Chiodini P, Sun JM, et al. Six versus fewer planned cycles of first-line platinum-based chemotherapy for non-small-cell lung cancer: a systematic review and meta-analysis of individual patient data. *The Lancet Oncology* 2014;15(11):1254-62.

170. Rossi A, Di Maio M, Chiodini P, et al. Carboplatin- or cisplatin-based chemotherapy in first-line treatment of small-cell lung cancer: the COCIS meta-analysis of individual patient data. *Journal of clinical oncology : official journal of the American Society of Clinical Oncology* 2012;30(14):1692-8.

171. Rothwell PM, Fowkes FG, Belch JF, et al. Effect of daily aspirin on long-term risk of death due to cancer: analysis of individual patient data from randomised trials. *Lancet (London, England)* 2011;377(9759):31-41.

172. Rothwell PM, Price JF, Fowkes FG, et al. Short-term effects of daily aspirin on cancer incidence, mortality, and non-vascular death: analysis of the time course of risks and benefits in 51 randomised controlled trials. *Lancet (London, England)* 2012;379(9826):1602-12.

173. Rothwell PM, Wilson M, Price JF, et al. Effect of daily aspirin on risk of cancer metastasis: a study of incident cancers during randomised controlled trials. *Lancet (London, England)* 2012;379(9826):1591-601.

174. Schadendorf D, Hodi FS, Robert C, et al. Pooled Analysis of Long-Term Survival Data From Phase II and Phase III Trials of Ipilimumab in Unresectable or Metastatic Melanoma. *Journal of clinical oncology : official journal of the American Society of Clinical Oncology* 2015;33(17):1889-94.

1  
2  
3  
4  
5  
6 175. Schmid D, Leitzmann MF. Television viewing and time spent sedentary in relation to  
7 cancer risk: a meta-analysis. *Journal of the National Cancer Institute* 2014;106(7).

10 176. Schmoll HJ, Twelves C, Sun W, et al. Effect of adjuvant capecitabine or fluorouracil, with  
11 or without oxaliplatin, on survival outcomes in stage III colon cancer and the effect of  
12 oxaliplatin on post-relapse survival: a pooled analysis of individual patient data from four  
13 randomised controlled trials. *The Lancet Oncology* 2014;15(13):1481-92.

16 177. Schottker B, Jorde R, Peasey A, et al. Vitamin D and mortality: meta-analysis of  
17 individual participant data from a large consortium of cohort studies from Europe and the  
18 United States. *BMJ (Clinical research ed)* 2014;348:g3656.

21 178. Schutz FA, Je Y, Richards CJ, et al. Meta-analysis of randomized controlled trials for the  
22 incidence and risk of treatment-related mortality in patients with cancer treated with  
23 vascular endothelial growth factor tyrosine kinase inhibitors. *Journal of clinical oncology :*  
24 official journal of the American Society of Clinical Oncology 2012;30(8):871-7.

27 179. Seng S, Liu Z, Chiu SK, et al. Risk of venous thromboembolism in patients with cancer  
28 treated with Cisplatin: a systematic review and meta-analysis. *Journal of clinical oncology :*  
29 official journal of the American Society of Clinical Oncology 2012;30(35):4416-26.

32 180. Shaikh F, Dupuis LL, Alexander S, et al. Cardioprotection and Second Malignant  
33 Neoplasms Associated With Dexrazoxane in Children Receiving Anthracycline  
34 Chemotherapy: A Systematic Review and Meta-Analysis. *Journal of the National Cancer*  
35 Institute 2016;108(4).

1  
2  
3  
4  
5  
6 181. Sheinfeld Gorin S, Krebs P, Badr H, et al. Meta-analysis of psychosocial interventions to  
7 reduce pain in patients with cancer. *Journal of clinical oncology : official journal of the*  
8  
9  
10 *American Society of Clinical Oncology* 2012;30(5):539-47.

11  
12  
13 182. Sjoquist KM, Burmeister BH, Smithers BM, et al. Survival after neoadjuvant  
14 chemotherapy or chemoradiotherapy for resectable oesophageal carcinoma: an updated  
15  
16 meta-analysis. *The Lancet Oncology* 2011;12(7):681-92.

17  
18  
19  
20 183. Skoetz N, Trelle S, Rancea M, et al. Effect of initial treatment strategy on survival of  
21 patients with advanced-stage Hodgkin's lymphoma: a systematic review and network meta-  
22  
23 analysis. *The Lancet Oncology* 2013;14(10):943-52.

24  
25  
26 184. Sonneveld P, Goldschmidt H, Rosinol L, et al. Bortezomib-based versus nonbortezomib-  
27 based induction treatment before autologous stem-cell transplantation in patients with  
28  
29 previously untreated multiple myeloma: a meta-analysis of phase III randomized, controlled  
30  
31 trials. *Journal of clinical oncology : official journal of the American Society of Clinical*  
32  
33 *Oncology* 2013;31(26):3279-87.

34  
35  
36  
37 185. Spratt DE, Gordon Spratt EA, Wu S, et al. Efficacy of skin-directed therapy for cutaneous  
38 metastases from advanced cancer: a meta-analysis. *Journal of clinical oncology : official*  
39  
40 *journal of the American Society of Clinical Oncology* 2014;32(28):3144-55.

41  
42  
43  
44 186. Tang V, Boscardin WJ, Stijacic-Cenzer I, et al. Time to benefit for colorectal cancer  
45 screening: survival meta-analysis of flexible sigmoidoscopy trials. *BMJ (Clinical research ed)*  
46  
47  
48 2015;350:h1662.

- 1  
2  
3  
4  
5  
6 187. Templeton AJ, McNamara MG, Seruga B, et al. Prognostic role of neutrophil-to-  
7 lymphocyte ratio in solid tumors: a systematic review and meta-analysis. Journal of the  
8 National Cancer Institute 2014;106(6):dju124.  
9  
10  
11  
12  
13 188. Teulings HE, Limpens J, Jansen SN, et al. Vitiligo-like depigmentation in patients with  
14 stage III-IV melanoma receiving immunotherapy and its association with survival: a  
15 systematic review and meta-analysis. Journal of clinical oncology : official journal of the  
16 American Society of Clinical Oncology 2015;33(7):773-81.  
17  
18  
19  
20  
21  
22 189. Theodoratou E, Montazeri Z, Hawken S, et al. Systematic meta-analyses and field  
23 synopsis of genetic association studies in colorectal cancer. Journal of the National Cancer  
24 Institute 2012;104(19):1433-57.  
25  
26  
27  
28  
29 190. Thosani N, Thosani SN, Kumar S, et al. Reduced risk of colorectal cancer with use of oral  
30 bisphosphonates: a systematic review and meta-analysis. Journal of clinical oncology :  
31 official journal of the American Society of Clinical Oncology 2013;31(5):623-30.  
32  
33  
34  
35  
36 191. Trabert B, Ness RB, Lo-Ciganic WH, et al. Aspirin, nonaspirin nonsteroidal anti-  
37 inflammatory drug, and acetaminophen use and risk of invasive epithelial ovarian cancer: a  
38 pooled analysis in the Ovarian Cancer Association Consortium. Journal of the National  
39 Cancer Institute 2014;106(2):djt431.  
40  
41  
42  
43  
44 192. Tsilidis KK, Kasimis JC, Lopez DS, et al. Type 2 diabetes and cancer: umbrella review of  
45 meta-analyses of observational studies. BMJ (Clinical research ed) 2015;350:g7607.  
46  
47  
48  
49 193. Vale CL, Burdett S, Ryzewska LH, et al. Addition of docetaxel or bisphosphonates to  
50 standard of care in men with localised or metastatic, hormone-sensitive prostate cancer: a  
51  
52  
53  
54  
55  
56  
57  
58  
59  
60



- 1  
2  
3  
4  
5  
6 systematic review and meta-analyses of aggregate data. *The Lancet Oncology*  
7  
8 2016;17(2):243-56.  
9  
10  
11 194. Valery PC, Moore SP, Meiklejohn J, et al. International variations in childhood cancer in  
12 indigenous populations: a systematic review. *The Lancet Oncology* 2014;15(2):e90-e103.  
13  
14  
15 195. Valsecchi ME, Silbermins D, de Rosa N, et al. Lymphatic mapping and sentinel lymph  
16 node biopsy in patients with melanoma: a meta-analysis. *Journal of clinical oncology : official*  
17 *journal of the American Society of Clinical Oncology* 2011;29(11):1479-87.  
18  
19  
20  
21  
22 196. van der Pas MH, Meijer S, Hoekstra OS, et al. Sentinel-lymph-node procedure in colon  
23 and rectal cancer: a systematic review and meta-analysis. *The Lancet Oncology*  
24  
25 2011;12(6):540-50.  
26  
27  
28  
29 197. Vera-Badillo FE, Templeton AJ, de Gouveia P, et al. Androgen receptor expression and  
30 outcomes in early breast cancer: a systematic review and meta-analysis. *Journal of the*  
31 *National Cancer Institute* 2014;106(1):djt319.  
32  
33  
34  
35  
36 198. Vidal L, Gafter-Gvili A, Salles G, et al. Rituximab maintenance for the treatment of  
37 patients with follicular lymphoma: an updated systematic review and meta-analysis of  
38 randomized trials. *Journal of the National Cancer Institute* 2011;103(23):1799-806.  
39  
40  
41  
42  
43 199. Violette PD, Agoritsas T, Alexander P, et al. Decision aids for localized prostate cancer  
44 treatment choice: Systematic review and meta-analysis. *CA: a cancer journal for clinicians*  
45 2015;65(3):239-51.  
46  
47  
48  
49  
50  
51  
52  
53  
54  
55  
56  
57  
58  
59  
60

- 1  
2  
3  
4  
5  
6 200. Vollset SE, Clarke R, Lewington S, et al. Effects of folic acid supplementation on overall  
7 and site-specific cancer incidence during the randomised trials: meta-analyses of data on  
8 50,000 individuals. *Lancet (London, England)* 2013;381(9871):1029-36.  
9  
10  
11  
12  
13 201. Vora A, Andreano A, Pui CH, et al. Influence of Cranial Radiotherapy on Outcome in  
14 Children With Acute Lymphoblastic Leukemia Treated With Contemporary Therapy. *Journal*  
15 *of clinical oncology : official journal of the American Society of Clinical Oncology* 2016.  
16  
17  
18  
19  
20 202. Waldron L, Haibe-Kains B, Culhane AC, et al. Comparative meta-analysis of prognostic  
21 gene signatures for late-stage ovarian cancer. *Journal of the National Cancer Institute*  
22 2014;106(5).  
23  
24  
25  
26 203. Wang HT, Yao YH, Li BG, et al. Neuroendocrine Prostate Cancer (NEPC) progressing from  
27 conventional prostatic adenocarcinoma: factors associated with time to development of  
28 NEPC and survival from NEPC diagnosis-a systematic review and pooled analysis. *Journal of*  
29 *clinical oncology : official journal of the American Society of Clinical Oncology*  
30 2014;32(30):3383-90.  
31  
32  
33  
34  
35  
36  
37 204. Wang SY, Chu H, Shamliyan T, et al. Network meta-analysis of margin threshold for  
38 women with ductal carcinoma in situ. *Journal of the National Cancer Institute*  
39 2012;104(7):507-16.  
40  
41  
42  
43  
44 205. Wang X, Ouyang Y, Liu J, et al. Fruit and vegetable consumption and mortality from all  
45 causes, cardiovascular disease, and cancer: systematic review and dose-response meta-  
46 analysis of prospective cohort studies. *BMJ (Clinical research ed)* 2014;349:g4490.  
47  
48  
49  
50  
51  
52  
53  
54  
55  
56  
57  
58  
59  
60

- 1  
2  
3  
4  
5  
6 206. Wang Y, Yang F, Shen Y, et al. Maintenance Therapy With Immunomodulatory Drugs in  
7  
8 Multiple Myeloma: A Meta-Analysis and Systematic Review. *Journal of the National Cancer*  
9  
10 *Institute* 2016;108(3).  
11  
12  
13 207. Wehner MR, Shive ML, Chren MM, et al. Indoor tanning and non-melanoma skin  
14  
15 cancer: systematic review and meta-analysis. *BMJ (Clinical research ed)* 2012;345:e5909.  
16  
17  
18 208. Winter AC, Rice MS, Fortner RT, et al. Migraine and breast cancer risk: a prospective  
19  
20 cohort study and meta-analysis. *Journal of the National Cancer Institute* 2015;107(1):381.  
21  
22  
23 209. Xing Y, Bronstein Y, Ross MI, et al. Contemporary diagnostic imaging modalities for the  
24  
25 staging and surveillance of melanoma patients: a meta-analysis. *Journal of the National*  
26  
27 *Cancer Institute* 2011;103(2):129-42.  
28  
29  
30 210. Yang XR, Chang-Claude J, Goode EL, et al. Associations of breast cancer risk factors with  
31  
32 tumor subtypes: a pooled analysis from the Breast Cancer Association Consortium studies.  
33  
34 *Journal of the National Cancer Institute* 2011;103(3):250-63.  
35  
36  
37 211. Yothers G, Sargent DJ, Wolmark N, et al. Outcomes among black patients with stage II  
38  
39 and III colon cancer receiving chemotherapy: an analysis of ACCENT adjuvant trials. *Journal*  
40  
41 *of the National Cancer Institute* 2011;103(20):1498-506.  
42  
43  
44 212. Zhang B, Beeghly-Fadiel A, Long J, et al. Genetic variants associated with breast-cancer  
45  
46 risk: comprehensive research synopsis, meta-analysis, and epidemiological evidence. *The*  
47  
48 *Lancet Oncology* 2011;12(5):477-88.  
49  
50  
51  
52  
53  
54  
55  
56  
57  
58  
59  
60

- 1  
2  
3  
4  
5  
6 213. Zhang B, Shu XO, Delahanty RJ, et al. Height and Breast Cancer Risk: Evidence From  
7  
8 Prospective Studies and Mendelian Randomization. Journal of the National Cancer Institute  
9  
10 2015;107(11).  
11  
12  
13 214. Zhao FH, Lewkowitz AK, Chen F, et al. Pooled analysis of a self-sampling HPV DNA Test  
14  
15 as a cervical cancer primary screening method. Journal of the National Cancer Institute  
16  
17 2012;104(3):178-88.  
18  
19  
20 215. Zheng JS, Hu XJ, Zhao YM, et al. Intake of fish and marine n-3 polyunsaturated fatty  
21  
22 acids and risk of breast cancer: meta-analysis of data from 21 independent prospective  
23  
24 cohort studies. BMJ (Clinical research ed) 2013;346:f3706.  
25  
26  
27  
28  
29  
30  
31  
32  
33  
34  
35  
36  
37  
38  
39  
40  
41  
42  
43  
44  
45  
46  
47  
48  
49  
50  
51  
52  
53  
54  
55  
56  
57  
58  
59  
60

1  
2  
3  
4  
5  
6  
7  
8  
9  
10  
11  
12  
13  
14  
15  
16  
17  
18  
19  
20  
21  
22  
23  
24  
25  
26  
27  
28  
29  
30  
31  
32  
33  
34  
35  
36  
37  
38  
39  
40  
41  
42  
43  
44  
45  
46  
47  
48  
49  
50  
51  
52  
53  
54  
55  
56  
57  
58  
59  
60

For peer review only



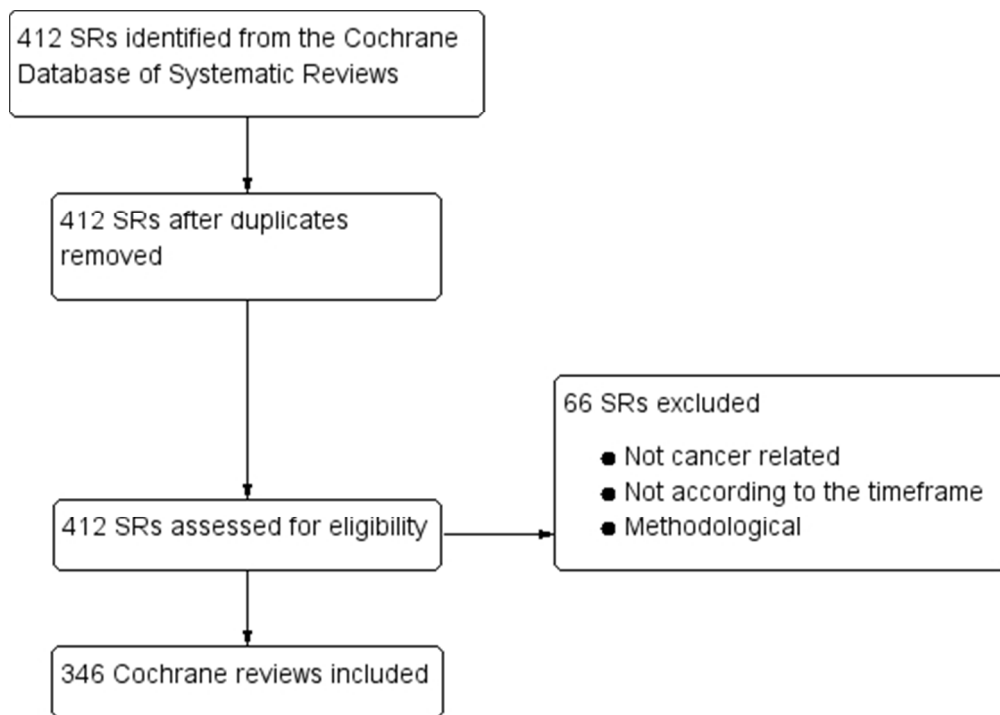

189x134mm (72 x 72 DPI)

view only

1  
2  
3  
4  
5  
6  
7  
8  
9  
10  
11  
12  
13  
14  
15  
16  
17  
18  
19  
20  
21  
22  
23  
24  
25  
26  
27  
28  
29  
30  
31  
32  
33  
34  
35  
36  
37  
38  
39  
40  
41  
42  
43  
44  
45  
46  
47  
48  
49  
50  
51  
52  
53  
54  
55  
56  
57  
58  
59  
60

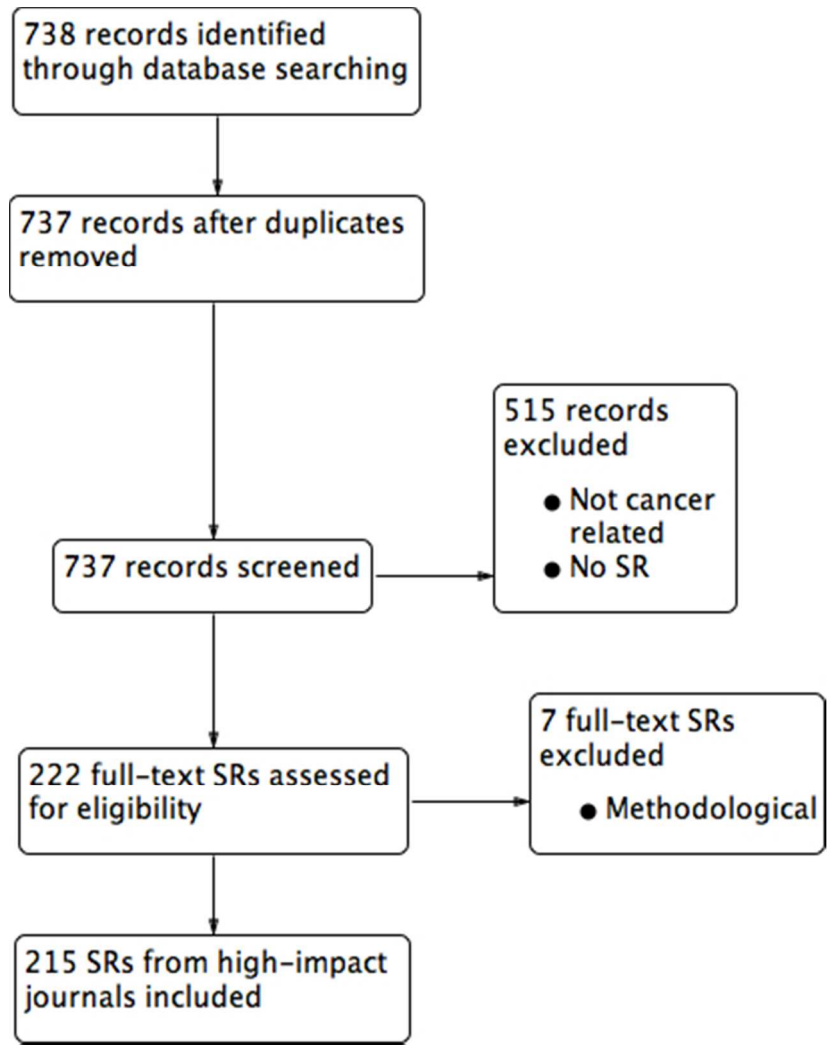

143x182mm (72 x 72 DPI)

1  
2  
3  
4  
5  
6  
7  
8  
9  
10  
11  
12  
13  
14  
15  
16  
17  
18  
19  
20  
21  
22  
23  
24  
25  
26  
27  
28  
29  
30  
31  
32  
33  
34  
35  
36  
37  
38  
39  
40  
41  
42  
43  
44  
45  
46  
47  
48  
49  
50  
51  
52  
53  
54  
55  
56  
57  
58  
59  
60

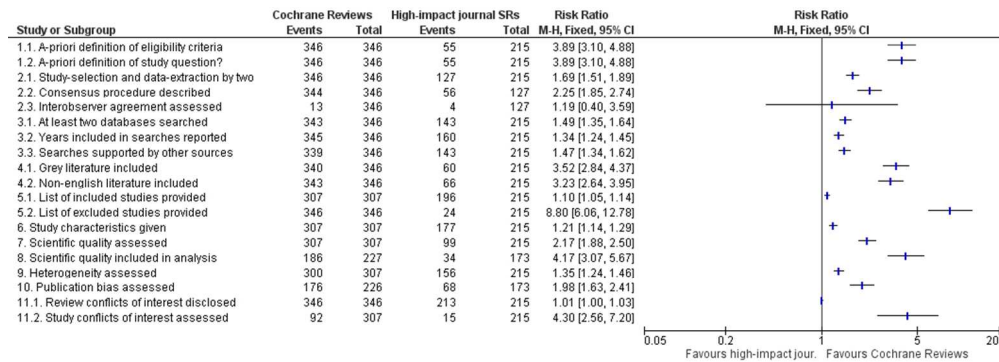

374x135mm (72 x 72 DPI)

peer review only



1  
2  
3  
4  
5  
6  
7  
8  
9  
10  
11  
12  
13  
14  
15  
16  
17  
18  
19  
20  
21  
22  
23  
24  
25  
26  
27  
28  
29  
30  
31  
32  
33  
34  
35  
36  
37  
38  
39  
40  
41  
42  
43  
44  
45  
46  
47  
48  
49  
50  
51  
52  
53  
54  
55  
56  
57  
58  
59  
60

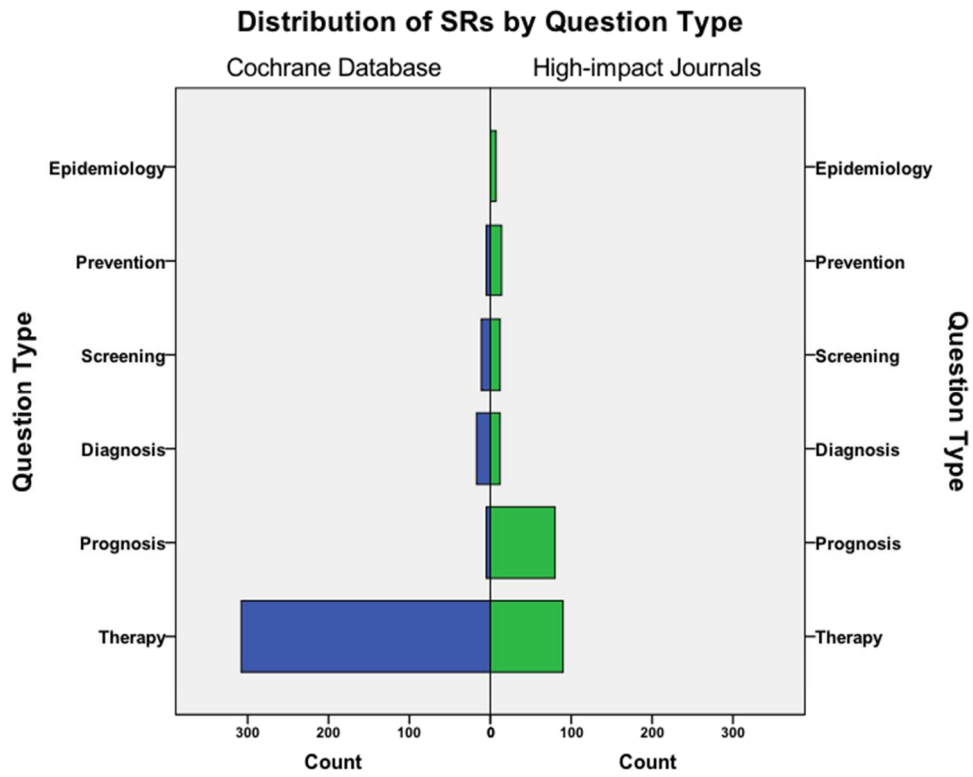

262x210mm (72 x 72 DPI)

View only

1  
2  
3  
4  
5  
6  
7  
8  
9  
10  
11  
12  
13  
14  
15  
16  
17  
18  
19  
20  
21  
22  
23  
24  
25  
26  
27  
28  
29  
30  
31  
32  
33  
34  
35  
36  
37  
38  
39  
40  
41  
42  
43  
44  
45  
46  
47  
48  
49  
50  
51  
52  
53  
54  
55  
56  
57  
58  
59  
60

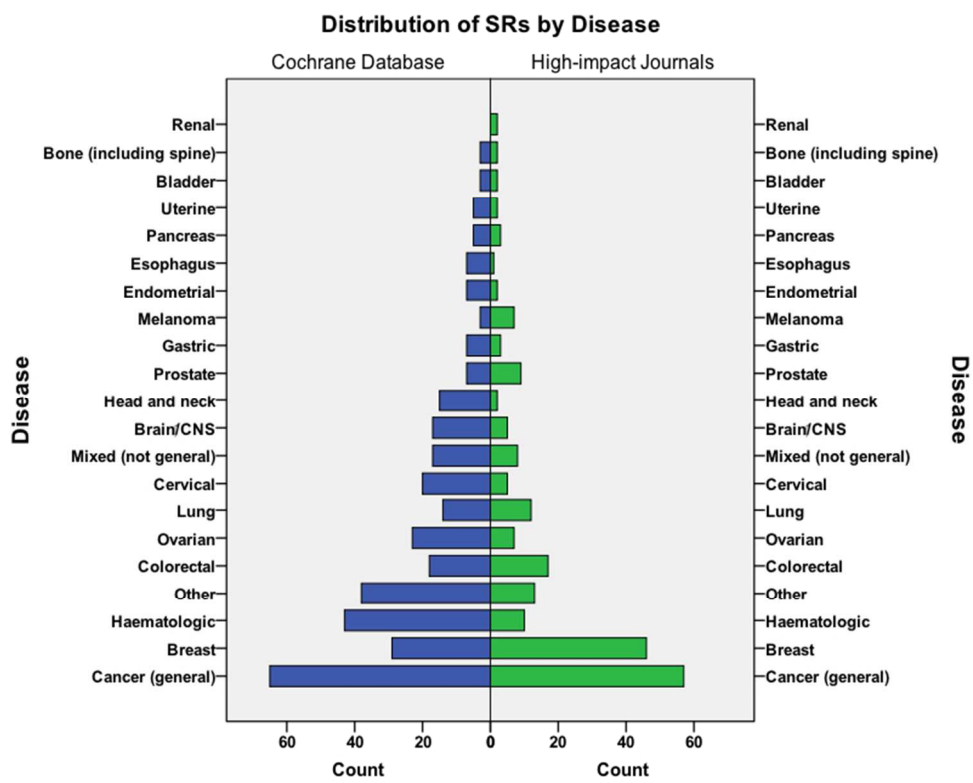

291x232mm (72 x 72 DPI)

View only

1  
2  
3  
4  
5  
6  
7  
8  
9  
10  
11  
12  
13  
14  
15  
16  
17  
18  
19  
20  
21  
22  
23  
24  
25  
26  
27  
28  
29  
30  
31  
32  
33  
34  
35  
36  
37  
38  
39  
40  
41  
42  
43  
44  
45  
46  
47  
48  
49  
50  
51  
52  
53  
54  
55  
56  
57  
58  
59  
60

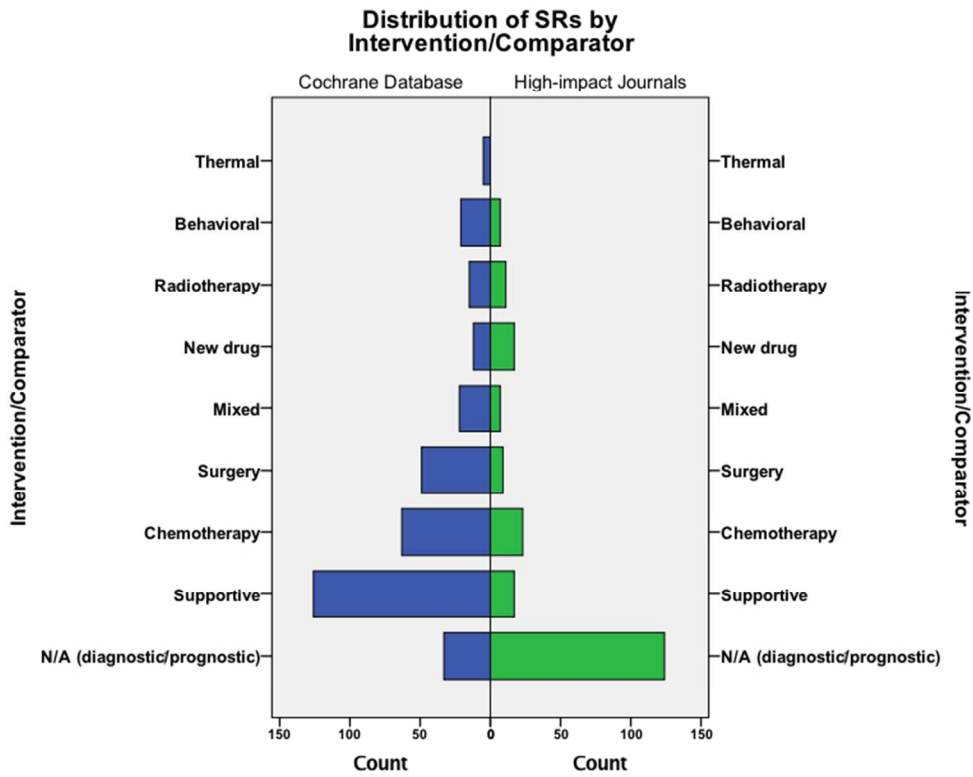

276x221mm (72 x 72 DPI)

View only

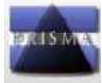

# PRISMA 2009 Checklist

| Section/topic                      | #  | Checklist item                                                                                                                                                                                                                                                                                              | Reported on page # |
|------------------------------------|----|-------------------------------------------------------------------------------------------------------------------------------------------------------------------------------------------------------------------------------------------------------------------------------------------------------------|--------------------|
| <b>TITLE</b>                       |    |                                                                                                                                                                                                                                                                                                             |                    |
| Title                              | 1  | Identify the report as a systematic review, meta-analysis, or both.                                                                                                                                                                                                                                         | 1                  |
| <b>ABSTRACT</b>                    |    |                                                                                                                                                                                                                                                                                                             |                    |
| Structured summary                 | 2  | Provide a structured summary including, as applicable: background; objectives; data sources; study eligibility criteria, participants, and interventions; study appraisal and synthesis methods; results; limitations; conclusions and implications of key findings; systematic review registration number. | 2-3                |
| <b>INTRODUCTION</b>                |    |                                                                                                                                                                                                                                                                                                             |                    |
| Rationale                          | 3  | Describe the rationale for the review in the context of what is already known.                                                                                                                                                                                                                              | 4                  |
| Objectives                         | 4  | Provide an explicit statement of questions being addressed with reference to participants, interventions, comparisons, outcomes, and study design (PICOS).                                                                                                                                                  | 4                  |
| <b>METHODS</b>                     |    |                                                                                                                                                                                                                                                                                                             |                    |
| Protocol and registration          | 5  | Indicate if a review protocol exists, if and where it can be accessed (e.g., Web address), and, if available, provide registration information including registration number.                                                                                                                               | 5                  |
| Eligibility criteria               | 6  | Specify study characteristics (e.g., PICOS, length of follow-up) and report characteristics (e.g., years considered, language, publication status) used as criteria for eligibility, giving rationale.                                                                                                      | 5                  |
| Information sources                | 7  | Describe all information sources (e.g., databases with dates of coverage, contact with study authors to identify additional studies) in the search and date last searched.                                                                                                                                  | 6                  |
| Search                             | 8  | Present full electronic search strategy for at least one database, including any limits used, such that it could be repeated.                                                                                                                                                                               | 6 and Appendix     |
| Study selection                    | 9  | State the process for selecting studies (i.e., screening, eligibility, included in systematic review, and, if applicable, included in the meta-analysis).                                                                                                                                                   | 6                  |
| Data collection process            | 10 | Describe method of data extraction from reports (e.g., piloted forms, independently, in duplicate) and any processes for obtaining and confirming data from investigators.                                                                                                                                  | 7                  |
| Data items                         | 11 | List and define all variables for which data were sought (e.g., PICOS, funding sources) and any assumptions and simplifications made.                                                                                                                                                                       | 7                  |
| Risk of bias in individual studies | 12 | Describe methods used for assessing risk of bias of individual studies (including specification of whether this was done at the study or outcome level), and how this information is to be used in any data synthesis.                                                                                      | 7-8                |
| Summary measures                   | 13 | State the principal summary measures (e.g., risk ratio, difference in means).                                                                                                                                                                                                                               | 8                  |
| Synthesis of results               | 14 | Describe the methods of handling data and combining results of studies, if done, including measures of consistency (e.g., $I^2$ ) for each meta-analysis.                                                                                                                                                   | 8                  |

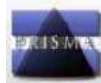

# PRISMA 2009 Checklist

Page 1 of 2

| Section/topic                 | #  | Checklist item                                                                                                                                                                                           | Reported on page #   |
|-------------------------------|----|----------------------------------------------------------------------------------------------------------------------------------------------------------------------------------------------------------|----------------------|
| Risk of bias across studies   | 15 | Specify any assessment of risk of bias that may affect the cumulative evidence (e.g., publication bias, selective reporting within studies).                                                             | NA                   |
| Additional analyses           | 16 | Describe methods of additional analyses (e.g., sensitivity or subgroup analyses, meta-regression), if done, indicating which were pre-specified.                                                         | NA                   |
| <b>RESULTS</b>                |    |                                                                                                                                                                                                          |                      |
| Study selection               | 17 | Give numbers of studies screened, assessed for eligibility, and included in the review, with reasons for exclusions at each stage, ideally with a flow diagram.                                          | 9 and flow diagrams  |
| Study characteristics         | 18 | For each study, present characteristics for which data were extracted (e.g., study size, PICOS, follow-up period) and provide the citations.                                                             | NA                   |
| Risk of bias within studies   | 19 | Present data on risk of bias of each study and, if available, any outcome level assessment (see item 12).                                                                                                | NA                   |
| Results of individual studies | 20 | For all outcomes considered (benefits or harms), present, for each study: (a) simple summary data for each intervention group (b) effect estimates and confidence intervals, ideally with a forest plot. | 9-12 and forest plot |
| Synthesis of results          | 21 | Present results of each meta-analysis done, including confidence intervals and measures of consistency.                                                                                                  | NA                   |
| Risk of bias across studies   | 22 | Present results of any assessment of risk of bias across studies (see Item 15).                                                                                                                          | NA                   |
| Additional analysis           | 23 | Give results of additional analyses, if done (e.g., sensitivity or subgroup analyses, meta-regression [see Item 16]).                                                                                    | NA                   |
| <b>DISCUSSION</b>             |    |                                                                                                                                                                                                          |                      |
| Summary of evidence           | 24 | Summarize the main findings including the strength of evidence for each main outcome; consider their relevance to key groups (e.g., healthcare providers, users, and policy makers).                     | 13-16                |
| Limitations                   | 25 | Discuss limitations at study and outcome level (e.g., risk of bias), and at review-level (e.g., incomplete retrieval of identified research, reporting bias).                                            | 13-14                |
| Conclusions                   | 26 | Provide a general interpretation of the results in the context of other evidence, and implications for future research.                                                                                  | 15-16                |
| <b>FUNDING</b>                |    |                                                                                                                                                                                                          |                      |
| Funding                       | 27 | Describe sources of funding for the systematic review and other support (e.g., supply of data); role of funders for the systematic review.                                                               | 18                   |

From: Moher D, Liberati A, Tetzlaff J, Altman DG, The PRISMA Group (2009). Preferred Reporting Items for Systematic Reviews and Meta-Analyses: The PRISMA Statement. PLoS Med 6(7): e1000097. doi:10.1371/journal.pmed1000097

For peer review only - <http://bmjopen.bmj.com/site/about/guidelines.xhtml>  
For more information, visit: [www.prisma-statement.org](http://www.prisma-statement.org)

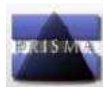

# PRISMA 2009 Checklist

For peer review only

- 1
- 2
- 3
- 4
- 5
- 6
- 7
- 8
- 9
- 10
- 11
- 12
- 13
- 14
- 15
- 16
- 17
- 18
- 19
- 20
- 21
- 22
- 23
- 24
- 25
- 26
- 27
- 28
- 29
- 30
- 31
- 32
- 33
- 34
- 35
- 36
- 37
- 38
- 39
- 40
- 41
- 42
- 43
- 44
- 45
- 46
- 47

# BMJ Open

## A Systematic Assessment of Cochrane Reviews and Systematic Reviews Published in High-Impact Medical Journals Related to Cancer

|                                 |                                                                                                                                                                                                                                                                                                                                                                                                                                                                                                                                                             |
|---------------------------------|-------------------------------------------------------------------------------------------------------------------------------------------------------------------------------------------------------------------------------------------------------------------------------------------------------------------------------------------------------------------------------------------------------------------------------------------------------------------------------------------------------------------------------------------------------------|
| Journal:                        | <i>BMJ Open</i>                                                                                                                                                                                                                                                                                                                                                                                                                                                                                                                                             |
| Manuscript ID                   | bmjopen-2017-020869.R1                                                                                                                                                                                                                                                                                                                                                                                                                                                                                                                                      |
| Article Type:                   | Research                                                                                                                                                                                                                                                                                                                                                                                                                                                                                                                                                    |
| Date Submitted by the Author:   | 01-Feb-2018                                                                                                                                                                                                                                                                                                                                                                                                                                                                                                                                                 |
| Complete List of Authors:       | Goldkuhle, Marius; Uniklinik Koln, Department I of Internal Medicine<br>Narayan, Vikram; Minneapolis Veterans Administration Health Care System, Urology Section; University of Minnesota, Department of Urology<br>Weigl, Aaron; Uniklinik Koln Klinik I fur Innere Medizin<br>Dahm, , Philipp ; Minneapolis Veterans Administration Health Care System, Urology Section; University of Minnesota, Department of Urology<br>Skoetz, Nicole; University Hospital of Cologne , Cochrane Haematological Malignancies Group; Department I of Internal Medicine |
| <b>Primary Subject Heading</b>: | Research methods                                                                                                                                                                                                                                                                                                                                                                                                                                                                                                                                            |
| Secondary Subject Heading:      | Oncology                                                                                                                                                                                                                                                                                                                                                                                                                                                                                                                                                    |
| Keywords:                       | methodological systematic review, AMSTAR, quality assessment                                                                                                                                                                                                                                                                                                                                                                                                                                                                                                |
|                                 |                                                                                                                                                                                                                                                                                                                                                                                                                                                                                                                                                             |

SCHOLARONE™  
Manuscripts

Only

1  
2  
3 **A Systematic Assessment of Cochrane Reviews and Systematic Reviews Published in High-**  
4 **Impact Medical Journals Related to Cancer**  
5  
6  
7  
8  
9  
10  
11  
12  
13

14 Marius Goldkuhle, Masters Student;<sup>1</sup> Vikram M. Narayan, House Officer;<sup>2</sup> Aaron Weigl,  
15 Research Associate;<sup>1</sup> Philipp Dahm, Professor;<sup>2</sup> and Nicole Skoetz, MD Senior Lecturer<sup>1</sup>  
16  
17  
18

19  
20 <sup>1</sup>Department of Internal Medicine, University Hospital of Cologne, Kerpener Str. 62, 50937  
21 Cologne, Germany  
22

23 <sup>2</sup>Minneapolis Veterans Administration Health Care System and Department of Urology,  
24 University of Minnesota, Mayo Memorial Building, 420 Delaware St SE, MMC 394,  
25 Minneapolis, MN 55455, US  
26  
27  
28

29 **Correspondence to:**  
30

31 Marius Goldkuhle, B.Sc.  
32

33 Kerpener Str. 62  
34

35 50937 Cologne, Germany  
36

37 Email: [marius.goldkuhle@uk-koeln.de](mailto:marius.goldkuhle@uk-koeln.de)  
38

39 Phone: +49 221 478-96648  
40  
41  
42  
43  
44  
45  
46  
47  
48  
49  
50  
51  
52  
53  
54  
55  
56  
57  
58  
59  
60



## **Abstract**

**Objective:** To compare cancer-related systematic reviews (SRs) published in the Cochrane Database of SRs (CDSR) and high-impact journals, with respect to type, content, quality, and citation rates.

**Design:** Methodological SR with assessment and comparison of SRs and meta-analyses. Two authors independently assessed methodological quality using an Assessment of Multiple Systematic Reviews (AMSTAR)-based extraction form. Both authors independently screened search results, extracted content-relevant characteristics, and retrieved citation numbers of the included reviews using the Clarivate Analytics Web of Science database.

**Data sources:** Cancer-related SRs were retrieved from the CDSR, as well as from the ten journals which publish oncologic SRs and had the highest impact factors, using a comprehensive search in both the CDSR and MEDLINE.

**Eligibility criteria for selecting studies:** We included all cancer-related SRs and meta-analyses published from January 2011 to May 2016. Methodological SRs were excluded.

**Results:** We included 346 applicable Cochrane reviews and 215 SRs from high-impact journals. Cochrane reviews consistently met more individual AMSTAR criteria, notably with regards to an a-priori design (RR 3.89; 95% CI 3.10 to 4.88), inclusion of the grey literature and trial registries (RR 3.52; 95% CI 2.84 to 4.37) in their searches, and the reporting of excluded studies (RR 8.80; 95% CI 6.06 to 12.78). Cochrane reviews were less likely to address questions of prognosis (RR 0.04; 95% CI 0.02 to 0.09), use individual patient data (RR 0.03; 95% CI 0.01 to 0.09), or be based on non-randomised controlled trials (RR 0.04; 95% CI 0.02 to 0.09). Citation rates of Cochrane reviews were notably lower than those for high-

1  
2  
3 impact journals (Cochrane reviews: mean number of citations 6.52 (range 0 to 143); High-  
4  
5 impact journal SRs: 74.45 (0 to 652)).  
6  
7

8 **Conclusions:** When comparing cancer-related SRs published in the CDSR versus those  
9  
10 published in high-impact medical journals, Cochrane reviews were consistently of higher  
11  
12 methodological quality, but cited less frequently.  
13  
14  
15

### 16 17 18 19 20 **Strengths and limitations of this study**

21  
22 -Unique cross-disciplinary comparison of systematic reviews in oncology including over 550  
23  
24 SRs.  
25  
26

27  
28 -Methodological assessment using AMSTAR, a validated and widely used tool to evaluate the  
29  
30 quality of systematic reviews.  
31  
32

33  
34 -It was not feasible to blind the authors of this study to the source journal of a given review,  
35  
36 which may have potentially biased the assessments.  
37  
38  
39  
40  
41  
42  
43  
44  
45  
46  
47  
48  
49  
50  
51  
52  
53  
54  
55  
56  
57  
58  
59  
60

## Introduction

The care of patients with cancer continues to be a clinical research priority as documented by an increasing number of publications of different types including systematic reviews (SRs). In fact, in recent years, oncology has been the medical discipline with the highest number of publications and the numbers continue to rise.<sup>1</sup> The large number of oncology-related research studies poses a tremendous challenge for patients, healthcare providers, and health policymakers alike when seeking to stay abreast of a particular oncologic topic. SRs follow reproducible methods to identify relevant studies for a given question, apply pre-defined and explicit eligibility criteria, perform assessments of the validity of findings, and systematically present the results. In this context, SRs can be helpful in summarizing the current best evidence for a particular clinical question to support both individual decision-making and in serving as the basis for clinical practice guidelines.<sup>2 3</sup> Cochrane is widely known for having developed many of the methodological standards based on which SRs should be conducted. These standards are specified in the 2016 updated Methodological Expectations of Cochrane Intervention Reviews (MECIR). However, a large number of oncology-related SRs are currently published by clinical journals, high-impact medical journals, oncology focused journals, as well as subspecialty journals. As the number of SRs has steadily increased over the past two decades, their methodological rigor has been drawn into scrutiny.<sup>4-6</sup> To date, no study has formally assessed the methodological quality of oncology-related SRs which assume such a prominent place in the medical literature.

In this study, we therefore sought to formally assess the methodological quality, type, content, and citation rates of oncology related SRs, comparing SRs published in high-impact medical journals with those published in the Cochrane Database of SRs (CDSR).

## Methods

The design and eligibility criteria of this project were based on an a priori written protocol. Study reporting is provided in accordance with the PRISMA statement. However, as a methodology-focused review, it was not eligible for a registration in the International Prospective Register Of Systematic Reviews (PROSPERO).

### *Patient involvement:*

Given its methodological focus, we did not evaluate patient-related outcomes. Therefore, we also chose not to involve patients' input in its design. However, the clear intent of this study is to indirectly benefit the welfare of patients by promoting the development and dissemination of high quality systematic reviews.

### *Eligibility criteria:*

We selected all Cochrane reviews that examined questions related to oncology. We furthermore identified all cancer related SRs published in the highest impact medical journals, as defined by the InCites™ Journal Citation Report® 2014, from the same time period via an electronic database search. To reflect contemporary reviews, we chose the five-year period between January 2011 and May 2016 as the study timeframe. We did not apply restrictions with regards to study design or meta-analytic methods, and also included SRs without a meta-analysis. We broadly included studies related to all types of cancer.

The ten journals with the highest impact factors that published SRs on cancer topics were: *A Cancer Journal for Clinicians*, *New England Journal of Medicine*, *The Lancet*, *JAMA*, *Lancet Oncology*, *Journal of Clinical Oncology*, *The BMJ*, *Nature Reviews Clinical Oncology*,

1  
2  
3 *Journal of the National Cancer Institute, and Cancer Research.* We did not apply any  
4  
5 language restrictions, however all selected journals published exclusively in English. We  
6  
7 excluded SRs with a methodological focus. For our examination, we used the original English  
8  
9 version of each Cochrane review (given that foreign language translation exists for many  
10  
11 Cochrane reviews). In cases where one or more updates of previously published Cochrane  
12  
13 reviews existed, we based our assessment on the most recently published version within the  
14  
15 defined timeframe.  
16  
17

### 18 19 20 *Study identification and selection*

21  
22 We identified all cancer-related Cochrane reviews in the CDSR from January 2011 to  
23  
24 May 2016 using the built in “Browse by topic” database function with the options “Cancer”  
25  
26 and “Stage: Review.” In a parallel step, we conducted a comprehensive literature search of  
27  
28 SRs published in the ten highest-impact journals from the same time-period on June 1st,  
29  
30 2016. An information specialist developed the search strategy for MEDLINE using the  
31  
32 following search terms: Cancer, leukaemia, tumor, tumour, leukemia, lymphoma, myeloma,  
33  
34 solid, neoplasm, meta-analysis, systematic review, publication dates: 2011 to 2016. We used  
35  
36 the following MeSH terms: Neoplasm by Histologic Type and Neoplasms by Site. The full  
37  
38 search strategy is provided in the *appendix*. Two authors independently (MG, VN) and in  
39  
40 duplicate performed title and abstract screening, full text screening, and ultimately,  
41  
42 selection of reviews to be included. We resolved discrepancies by discussion with one of two  
43  
44 other authors (NS, PD).  
45  
46  
47  
48

### 49 50 *Quality assessment*

51  
52 We evaluated methodological quality with the Assessment of Multiple Systematic  
53  
54 Reviews (AMSTAR) checklist, by Shea, et al.<sup>7</sup> The checklist consists of 11 items and was  
55  
56  
57  
58  
59

1  
2  
3 specially developed to assess the methodological quality of SRs and meta-analyses. In cases  
4  
5 where AMSTAR combined several items into one criterion, we separated these out into 20  
6  
7 individual items for the sake of transparency but readjusted them into single items for the  
8  
9 AMSTAR scoring. A complete list of items can be found in the *appendix*; answer options were  
10  
11 “yes,” “no,” and “not applicable.” Methods like sensitivity- and subgroup-analyses, or funnel  
12  
13 plots for the assessment of publication bias require a minimum quantity of studies. For  
14  
15 example, meaningful interpretations of funnel plots require a threshold of at least ten  
16  
17 studies.<sup>8</sup> In SRs where there was evidence that these secondary analyses were planned, but  
18  
19 could not be meaningfully conducted, this criterion was rated as fulfilled. Two authors (MG,  
20  
21 VN) performed the quality assessments independently and in duplicate. We resolved  
22  
23 disagreements by discussion and with a third author (NS, PD).  
24  
25  
26  
27  
28

### 29 *Data extraction and extracted items*

30  
31 The included studies were then reviewed in detail as part of a clinical content  
32  
33 analysis. We extracted the review type, the study design of the included studies, and review  
34  
35 question (e.g. therapeutic, diagnostic, or prognostic) of included studies. We chose the  
36  
37 following items to reflect the review content: Cancer type (e.g. breast, lung, colorectal, but  
38  
39 also “cancer in general”, “mixed” (but not in general) and “other” (e.g. liver metastases or  
40  
41 male breast cancer), intervention (e.g. chemotherapy, “new drug” (targeted therapies, such  
42  
43 as monoclonal antibodies and small molecules)), radiotherapy, surgery, supportive (e.g.  
44  
45 interventions for cancer-related pain, rehabilitation after cancer treatment, interventions for  
46  
47 depression in cancer patients, or adjuvant bisphosphonate treatment for cancer patients), or  
48  
49 not applicable (if prognostic, diagnostic or epidemiological review question), population  
50  
51 (adults, children or both), the number of included studies, and the number of included  
52  
53  
54  
55  
56  
57  
58  
59  
60

1  
2  
3 patients. A complete list of the 17 criteria can be found in the *appendix*. To ensure the  
4  
5 completeness of our assessment we obtained and formally considered any additional  
6  
7 information from all (online) supplements and appendices. Two authors (MG, VN)  
8  
9 independently extracted this data using a previously piloted form. The data extraction form  
10  
11 was designed a priori with consensus of four authors (MG, VN, NS, PD). Discrepancies were  
12  
13 once again resolved through discussion and third author arbitration if necessary (NS, PD).  
14  
15

### 16 17 *Citations*

18  
19 We gathered the citation counts for both Cochrane reviews and high-impact journal  
20  
21 reviews using the Clarivate Analytics Web of Science database. Citations counts were  
22  
23 assessed on February 15th, 2017 by two authors independently (AW, MG). For updates of  
24  
25 Cochrane reviews, we considered the citations of the respective update(s) and added  
26  
27 citations from the original review, as long as the original review and any updates were  
28  
29 published within the predefined timeframe of our study.  
30  
31  
32

### 33 34 *Data synthesis and analysis*

35  
36 For dichotomous variables, we determined rates, and for continuous variables, we  
37  
38 calculated median and interquartile range (IQR), or mean and range. To compare the quality  
39  
40 of both groups, we used risk ratios and the corresponding 95% confidence intervals. We  
41  
42 defined an event as fulfilling a given quality indicator and have presented this data in forest  
43  
44 plots. All statistical analyses were undertaken using Review Manager Version 5.3.  
45  
46  
47  
48  
49  
50  
51  
52  
53  
54  
55  
56  
57  
58  
59  
60

## Results

### *Search results*

As shown in the study flowchart (Figure 1), our search for oncology-related Cochrane reviews identified 412 records, of which 346 were determined to be cancer related and appropriate according to our selection criteria. Our electronic database search for high-impact SRs identified 738 records, of which 215 were ultimately included, excluding seven reviews at the full-text stage which focused on methodological issues (Figure 2).<sup>9-15</sup> The references of the included articles are provided in the *online appendix*.

### *Quality*

In general, reviews published by Cochrane met each quality criterion to a greater extent than reviews published in high-impact journals (Figure 3). Cochrane reviews were more likely to report an a priori design, including the definition of the review question and a planned inclusion and exclusion criteria before conducting the review (both with a risk ratio of 3.89; 95% confidence interval (CI) 3.10 to 4.88) (AMSTAR Item 1). Differences also existed in the inclusion of unpublished and non-English literature; Cochrane reviews were more likely to include unpublished (risk ratios (RR) 3.52 (95% CI 2.84 to 4.37) and non-English studies) (RR 3.23 (95% CI 2.64 to 3.95)) (Item 4). Included studies were listed relatively equally between the two (RR 1.10; 95% CI 1.05 to 1.14) comparators, whereas a list of excluded studies, at least those rejected in the course of full-text screening, were provided almost nine times more often by Cochrane reviews (RR 8.80; 95% CI 6.06 to 12.78) (Item 5). Further, a quality assessment of the included studies (using tools such as Cochrane's Risk of Bias, the Jadad scale, or the Newcastle-Ottawa scale) was undertaken over twice as frequently in Cochrane reviews (RR 2.17; 95% CI 1.88 to 2.50) (Item 7). A meta-analysis was



1  
2  
3 conducted in 67% (227/346) of Cochrane reviews and in 80% (173/215) of high-impact  
4  
5 journal SRs. A sensitivity analysis based on study quality or risk of bias was more commonly  
6  
7 reported in Cochrane reviews (RR 4.17; 95% CI 3.07 to 5.67). Almost 23% (53/227) of  
8  
9 Cochrane reviews planned to undertake but did not perform sensitivity-analyses due to an  
10  
11 insufficient number of included studies, the inclusion of high risk of bias studies only, or  
12  
13 unclear information regarding study quality. Formal assessments of potential publication  
14  
15 bias like funnel plots were undertaken or planned about twice as frequently among reviews  
16  
17 produced by Cochrane (RR 1.98; 95% CI 1.63 to 2.41) than in SRs published in high impact  
18  
19 journals. However, 47.3% (107/226) of Cochrane reviews and 1.7% (3/173) of reviews from  
20  
21 high-impact journals planned but could not perform such assessments due to an insufficient  
22  
23 number of included studies (AMSTAR Item 10). The vast majority of SRs both in Cochrane  
24  
25 reviews and high-impact journals disclosed potential conflicts of interest of the SR authors  
26  
27 (RR 1.01; 95% CI 1.00 to 1.03). However, potential conflicts of interest of the trials included  
28  
29 in the SRs were reported more frequently by Cochrane reviews than by SRs in high-impact  
30  
31 journals; with Cochrane reviews being more than four times as likely to provide this  
32  
33 information (RR 4.30; 95% CI 2.56 to 7.20) (Item 11).  
34  
35  
36  
37  
38  
39

#### 40 *Characteristics of included SRs*

41  
42 With regards to geographical origin, the largest proportion of Cochrane reviews  
43  
44 originated from Europe (67.3%; 233/346) and relatively infrequently originated from North  
45  
46 America (7.5%; 26/346); meanwhile, high-impact journal SRs were as likely to come from  
47  
48 Europe (44.2%; 95/215) or North America (40.9%; 88/215; Table 1). Cochrane reviews were  
49  
50 much less likely to use individual patient data (IPD) (RR 0.03; 95% CI 0.01 to 0.09) compared  
51  
52 to aggregate study-level data. The majority of Cochrane reviews used the latter (95.7%;  
53  
54  
55  
56  
57  
58  
59  
60

1  
2  
3 331/346), with only three (0.9%; 3/346) including individual patient data exclusively, and 12  
4  
5 (3.5%; 12/346) using both types of data. SRs from high-impact journals were also primarily  
6  
7 based on study level data (68.4%; 147/215), but a much larger proportion used IPD (31.2%;  
8  
9 67/216). Network meta-analyses were uncommon among both Cochrane reviews (0.6%;  
10  
11 2/346) and high-impact SRs (2.8%; 6/215).

12  
13  
14  
15 Cochrane reviews predominantly investigated therapeutic (89%; 308/346) questions.  
16  
17 Among SRs from high-impact journals, there was also a large number of prognostic reviews  
18  
19 (37.2%; 80/215) in addition to therapeutic reviews (41.9%; 90/215; Figure 4). Overall,  
20  
21 Cochrane reviews were less likely to include non-randomised controlled trials (RR 0.04; 95%  
22  
23 CI 0.02 to 0.09). Therapeutic reviews published in the CDSR primarily included RCTs in 78.6%  
24  
25 (242/308) or both RCTs and non-RCTs in 21.1% (65/308). High-impact journal reviews  
26  
27 assessing therapeutic questions were primarily based on RCTs (58.9% (53/90)), with only  
28  
29 26.7% (24/90) based on non-RCTs.  
30  
31  
32  
33

#### 34 *Content of included SRs*

35  
36 91.9% (318/346) of the Cochrane reviews and 70.2% (151/215) high-impact journal SRs  
37  
38 focused on adult study populations. Only 7.5% (26/346) of SRs from the CDSR and 2.8%  
39  
40 (6/215) of reviews from high-impact journals focused solely on paediatric patients.  
41  
42  
43

44  
45 The largest group of Cochrane reviews addressed general cancer topics (for example:  
46  
47 supportive measures for patients receiving cytotoxic chemotherapy) not limited to a specific  
48  
49 type of disease (18.8 %; 65/346), followed by SRs concerning hematological malignancies  
50  
51 (12.4%; 43/346), and breast cancer (8.4%; 29/346; Figure 5). Among SRs published in high-  
52  
53  
54  
55  
56  
57  
58  
59  
60

1  
2  
3 impact journals, general cancer topics was also the main category followed by breast cancer  
4  
5 in 21.4% (47/215) and colorectal cancer in 7.9% (17/215).  
6  
7

8 SRs published in Cochrane most commonly examined supportive care interventions  
9  
10 (40.3%; 126/313), followed by chemotherapy (20.1%; 63/313), and surgery (16.7%; 49/313;  
11  
12 Figure 6). Reviews in high-impact journals, on the other hand, predominantly evaluated  
13  
14 specific chemotherapy regimens (25.3%; 23/91), new drugs (18.7%; 17/91), and supportive  
15  
16 care interventions (18.7%; 17/91).  
17  
18  
19

20  
21 Overall, Cochrane reviews included fewer studies per review than high-impact journal  
22  
23 SRs (median: 6 studies (IQR: 2-13) compared to 18 (18-38.8)) and fewer patients (1020  
24  
25 (194.5-2845) compared to 7730 (3288-29.423)). About 11.3% (39/346) of Cochrane SRs were  
26  
27 so-called “empty reviews”, meaning the authors could not identify eligible studies to include  
28  
29 in their review. Furthermore, 35 (10.1%) reviews retrieved from the CDSR included only one  
30  
31 study. In contrast, none of the SRs in high-impact journals were empty or contained only a  
32  
33 single study.  
34  
35  
36

### 37 38 *Citations*

39  
40 Cochrane reviews were cited considerably less frequently than SRs published in high-  
41  
42 impact medical journals. The mean number of citations for Cochrane reviews was 6.92,  
43  
44 ranging from 0 to 143. High-impact journal SRs had a mean of 74.45 citations with a range  
45  
46 from 0 to 652.  
47  
48  
49  
50  
51  
52  
53  
54  
55  
56  
57  
58  
59  
60

## Discussion

### *Principal findings*

This methodological assessment found that Cochrane reviews were conducted with greater methodological rigor than SRs published in high-impact journals but were cited less frequently. The largest gap in terms of methodological quality with regards to an individual AMSTAR criterion was the reporting of excluded studies, which was met by all Cochrane reviews and only 11.2% (24/215) of SRs published by high-impact journals. Other major differences relate to the reporting of possible conflicts of interest of included studies, the existence of an a priori design, the conduct of sensitivity analyses for study quality of included studies, and the inclusion of non-published studies. High-impact SRs were more likely to be based on IPD, include non-RCTs and address questions other than therapy, namely prognosis. SRs that included only one or no included studies were published exclusively in the Cochrane Library, and not in high-impact journals.

### *Strengths and weaknesses of this systematic review*

We performed this study based on an a priori protocol, a comprehensive search strategy, and data abstraction in duplicate, which lends strength to the validity of our findings. In addition, we performed a clinical content analysis comparing the two groups of SR sources. The reliability of this work was ensured through adherence to the review methods proposed by PRISMA and Cochrane. Our quality assessment was based on AMSTAR, an instrument previously validated for the assessment of SRs from RCTs which represented the best available tool at the time when we planned and conducted this review.<sup>16 17</sup> An updated version of AMSTAR has only recently become available.<sup>18</sup>

1  
2  
3 Given its focus on methodological quality, this study is unable to explain the missing link  
4  
5 between the high methodological quality of Cochrane reviews and relatively low citation  
6  
7 rates. Potential explanations may relate to the clinical topic areas, and too great a focus on  
8  
9 evidence from RCTs, which has long been a hallmark of Cochrane reviews. In addition,  
10  
11 Cochrane reviews that include none (“empty reviews”) or only one study are less likely to  
12  
13 provide newsworthy results and yield high citation rates.  
14  
15

16  
17 The Cochrane Library permits co-publication of Cochrane reviews in other journals, which is  
18  
19 however subject to formal pre-approval. A large number of co-published reviews could have  
20  
21 potentially biased our results, though we identified only two reviews with this issue; thus  
22  
23 this concern is only of minor relevance.<sup>19 20</sup>  
24  
25

#### 26 27 *Strengths and weaknesses in relation to other systematic reviews*

28  
29 In 2016, a cross-sectional assessment of SRs was published which included a similar  
30  
31 comparison of Cochrane and non-Cochrane reviews.<sup>5</sup> This assessment was cross-disciplinary  
32  
33 and not limited to cancer alone. It consisted of SRs published during a one-month period in  
34  
35 2014, and only 3% (9/300) of the total assessed SRs came from journals with an impact  
36  
37 factor exceeding ten. Most of the randomly selected SRs and Cochrane reviews investigated  
38  
39 therapeutic questions. Similar to our study, Cochrane reviews were more likely to fulfil the  
40  
41 important methodological criteria such as protocol availability, the inclusion of unpublished  
42  
43 and grey literature, an electronic data-search in more than two databases, data extraction  
44  
45 and study selection performed in duplicate, or the assessment of study quality. Findings  
46  
47 were also similar with regards to the proportion of reviews that did not perform a sensitivity  
48  
49 analysis based on study quality.<sup>5</sup> Another similar study by Moher et al. documented  
50  
51 improved reporting over a 10 year time frame.<sup>4</sup> A variety of other reports, including  
52  
53  
54  
55  
56  
57  
58  
59  
60

1  
2  
3 assessments in other medical research fields have identified similar deficiencies in the  
4  
5 quality of SRs but none of them have specifically focused on oncology-related reviews.<sup>6 16 21-</sup>

6  
7 26

8  
9  
10 *Meaning of this methodological systematic review: explanations, implications and further*  
11  
12 *research*

13  
14  
15 Our methodological assessment highlights the major differences that exist among  
16  
17 published SRs in oncology. Users of the medical literature should therefore not assume that  
18  
19 SRs are equivalent in their design, methodological rigor, or validity of their conclusions.  
20  
21 Quality criteria for SRs are well established; one key criterion is that of an a priori protocol  
22  
23 which governs all aspects of the review process to prevent selective or biased reporting and  
24  
25 avoid duplicate publication.<sup>27-30</sup> Registration of protocols with platforms such as PROSPERO  
26  
27 can aid in holding SRs accountable in this regard; some journals have made this mandatory.<sup>31</sup>  
28  
29 Deficits in the disclosure of excluded studies, for example, narrow the transparency of study  
30  
31 selection, while absence of sensitivity analyses impede the possibility of readers to assess  
32  
33 the findings against the background of study quality. Conflicts of interest may also play a role  
34  
35 in the heterogeneity of published SRs.  
36  
37  
38  
39  
40

41 A practical reason for differences in the reporting quality between Cochrane reviews  
42  
43 and high-impact medical journals may lie in the limited space for reporting provided in  
44  
45 printed medical journals. A recent assessment of meta-analyses of surgical interventions  
46  
47 supports the assumption of the negative association between limited publication space and  
48  
49 completeness of reporting.<sup>25</sup> Cochrane does not impose space restrictions and as such  
50  
51 Cochrane SR authors have more freedom to provide complete reporting. However, given  
52  
53 that most journals now offer the opportunity to provide additional e-content on the  
54  
55  
56  
57  
58  
59  
60

1  
2  
3 internet, there should be fewer reasons for less than complete transparency. In this  
4  
5 assessment, we took care to include all available content, including online supplementary  
6  
7 tables and appendices in our assessment. Published Cochrane reviews typically also undergo  
8  
9 a more rigorous development process that includes the compulsory publication of a protocol  
10  
11 that has previously undergone internal editorial review and external peer review as specified  
12  
13 in the organization's MECIR policy. This may be the main reason why Cochrane reviews are  
14  
15 much more likely to meet more of the requirements of transparent reporting checklists.<sup>17 32</sup>  
16  
17  
18 <sup>33</sup> Journal editors should similarly mandate strict adherence to PRISMA and other reporting  
19  
20 guidelines.  
21  
22

23  
24 Given the considerable investment of resources that goes into development of high  
25  
26 quality Cochrane reviews, their relatively low impact is a concern. It appears critically  
27  
28 important that Cochrane editors take greater initiative at directing review authors to topics  
29  
30 where the greatest clinical interest lies.  
31  
32

33  
34 This work demonstrates the need to critically assess SRs prior to using their evidence.  
35  
36 For clinicians, the *Users' Guide to the Medical Literature* by Murad, et al.<sup>30</sup> provides a  
37  
38 practical framework for assessing the validity, impact and applicability of SRs. For  
39  
40 researchers and policy-makers aside from AMSTAR, the recently introduced ROBIS tool  
41  
42 allows to comprehensively evaluate possible risk of bias in SRs at the review level.<sup>34</sup> At  
43  
44 present it covers SRs with interventional, diagnostic, prognostic, and etiologic review  
45  
46 questions and involves a three domain appraisal of the relevance of the respective review,  
47  
48 an evaluation of possible risks of bias during the review process, and a concluding judgment  
49  
50 of overall risk of bias of the review findings.<sup>34</sup>  
51  
52  
53  
54  
55  
56  
57  
58  
59  
60

**Conclusion**

Cancer-related SRs that are published in the CDSR demonstrate higher adherence to methodological and reporting standards than cancer-related SRs published in high-impact medical journals but are cited less frequently. Our assessment underscores the importance of performing a critical appraisal of SRs before including their evidence into guideline development or making individual clinical decisions.

For peer review only



## **Acknowledgements**

**Contributors:** MG designed the data collection tools and analysis, selected studies, analysed and extracted data, and drafted and revised the paper. VN designed the data collection tools and analysis, selected studies, analysed and extracted data, and drafted and revised the paper. AW extracted and analysed data and revised the paper. PD initiated the project, designed the data collection tools and analysis, selected studies, monitored data collection and analysis, and revised the paper. NS initiated the project, designed the data collection tools and analysis, selected studies, monitored data collection and analysis, and revised the paper. All authors approved the final version of the article. All authors, external and internal, had full access to all of the data (including statistical reports and tables) in the study and can take responsibility for the integrity of the data and the accuracy of the data analysis.

**Copyright:** The Corresponding Author has the right to grant on behalf of all authors and does grant on behalf of all authors, a worldwide licence to the BMJ Publishing Group Ltd and its licensees in perpetuity, in all forms, formats and media (whether known now or created in the future), to i) publish, reproduce, distribute, display and store the Contribution, ii) translate the Contribution into other languages, create adaptations, reprints, include within collections and create summaries, extracts and/or, abstracts of the Contribution, iii) create any other derivative work(s) based on the Contribution, iv) to exploit all subsidiary rights in the Contribution, v) the inclusion of electronic links from the Contribution to third party material where-ever it may be located; and, vi) licence any third party to do any or all of the above. We attest that we have obtained appropriate permissions and paid any required fees for use of copyright protected materials.

1  
2  
3 **Funding:** Two authors received travel grants by Cochrane to attend and present data at the  
4  
5 23rd Cochrane Colloquium in Seoul, 2016. This research received no other specific grant  
6  
7 from any funding agency in the public, commercial or not-for-profit sectors.  
8  
9

10 **Competing interests:** All authors have completed the ICMJE uniform disclosure form at  
11  
12 [www.icmje.org/coi\\_disclosure.pdf](http://www.icmje.org/coi_disclosure.pdf) and declare: MG, AW and NS are part of the Cochrane  
13  
14 Haematological Malignancies Group, PD is part of the Cochrane Urology Group. Further they  
15  
16 declare: No other support from any organisation for the submitted work; no financial  
17  
18 relationships with any organisations that might have an interest in the submitted work in the  
19  
20 previous three years; no other relationships or activities that could appear to have  
21  
22 influenced the submitted work.  
23  
24  
25

26  
27 **Ethical approval:** Not required  
28  
29

30 **Data sharing:** No additional data available  
31  
32

33  
34 **Transparency:** We affirm that the manuscript is an honest, accurate, and transparent  
35  
36 account of the study being reported; that no important aspects of the study have been  
37  
38 omitted; and that any discrepancies from the study as planned have been explained.  
39  
40  
41  
42  
43  
44  
45  
46  
47  
48  
49  
50  
51  
52  
53  
54  
55  
56  
57  
58  
59  
60

## Figure legends

Figure 1. PRISMA flow diagram of Cochrane reviews

Figure 2. PRISMA flow diagram of high-impact journal SRs

Figure 3. Forrest plot comparing to what extent Cochrane reviews and SRs published in high-impact journals meet criteria for methodological quality

Figure 4. Distribution of Cochrane reviews and high-impact journal SRs by review question

Figure 5. Distribution of Cochrane reviews and high-impact journal SRs by disease

Figure 6. Distribution of Cochrane reviews and high-impact journal SRs by intervention

## References

1. 2015 Journal Citation Reports®: Clarivate Analytics; 2017 [
2. Woolf S, Schunemann HJ, Eccles MP, et al. Developing clinical practice guidelines: types of evidence and outcomes; values and economics, synthesis, grading, and presentation and deriving recommendations. *Implementation science : IS* 2012;7:61. doi: 10.1186/1748-5908-7-61 [published Online First: 2012/07/06]
3. Mulrow CD. Rationale for systematic reviews. *BMJ (Clinical research ed)* 1994;309(6954):597-9. [published Online First: 1994/09/03]
4. Moher D, Tetzlaff J, Tricco AC, et al. Epidemiology and reporting characteristics of systematic reviews. *PLoS medicine* 2007;4(3):e78. doi: 10.1371/journal.pmed.0040078 [published Online First: 2007/03/29]
5. Page MJ, Shamseer L, Altman DG, et al. Epidemiology and Reporting Characteristics of Systematic Reviews of Biomedical Research: A Cross-Sectional Study. *PLoS medicine* 2016;13(5):e1002028. doi: 10.1371/journal.pmed.1002028 [published Online First: 2016/05/25]
6. Han JL, Gandhi S, Bockoven CG, et al. The landscape of systematic reviews in urology (1998 to 2015): an assessment of methodological quality. *BJU International* 2017;119(4):638-49. doi: 10.1111/bju.13653
7. Shea BJ, Grimshaw JM, Wells GA, et al. Development of AMSTAR: a measurement tool to assess the methodological quality of systematic reviews. *BMC medical research methodology* 2007;7:10. doi: 10.1186/1471-2288-7-10 [published Online First: 2007/02/17]
8. Sterne JA, Sutton AJ, Ioannidis JP, et al. Recommendations for examining and interpreting funnel plot asymmetry in meta-analyses of randomised controlled trials. *BMJ (Clinical research ed)* 2011;343:d4002. doi: 10.1136/bmj.d4002 [published Online First: 2011/07/26]
9. Flaherty KT, Hennig M, Lee SJ, et al. Surrogate endpoints for overall survival in metastatic melanoma: a meta-analysis of randomised controlled trials. *The Lancet Oncology* 2014;15(3):297-304. doi: 10.1016/s1470-2045(14)70007-5 [published Online First: 2014/02/04]
10. Freund KM, Battaglia TA, Calhoun E, et al. Impact of patient navigation on timely cancer care: the Patient Navigation Research Program. *Journal of the National Cancer Institute* 2014;106(6):dju115. doi: 10.1093/jnci/dju115 [published Online First: 2014/06/19]
11. Lemieux J, Goodwin PJ, Bordeleau LJ, et al. Quality-of-life measurement in randomized clinical trials in breast cancer: an updated systematic review (2001-2009). *Journal of the National Cancer Institute* 2011;103(3):178-231. doi: 10.1093/jnci/djq508 [published Online First: 2011/01/11]
12. Paoletti X, Oba K, Bang YJ, et al. Progression-free survival as a surrogate for overall survival in advanced/recurrent gastric cancer trials: a meta-analysis. *Journal of the National Cancer Institute* 2013;105(21):1667-70. doi: 10.1093/jnci/djt269 [published Online First: 2013/10/11]

13. Peron J, Pond GR, Gan HK, et al. Quality of reporting of modern randomized controlled trials in medical oncology: a systematic review. *Journal of the National Cancer Institute* 2012;104(13):982-9. doi: 10.1093/jnci/djs259 [published Online First: 2012/07/05]
14. Zikos E, Ghislain I, Coens C, et al. Health-related quality of life in small-cell lung cancer: a systematic review on reporting of methods and clinical issues in randomised controlled trials. *The Lancet Oncology* 2014;15(2):e78-89. doi: 10.1016/s1470-2045(13)70493-5 [published Online First: 2014/02/01]
15. Henson L, Gao W, Higginson I, et al. Emergency department attendance by patients with cancer in the last month of life: a systematic review and meta-analysis. *Lancet (London, England)* 2015;385 Suppl 1:S41. doi: 10.1016/s0140-6736(15)60356-7 [published Online First: 2015/08/28]
16. Shea BJ, Hamel C, Wells GA, et al. AMSTAR is a reliable and valid measurement tool to assess the methodological quality of systematic reviews. *Journal of clinical epidemiology* 2009;62(10):1013-20. doi: 10.1016/j.jclinepi.2008.10.009 [published Online First: 2009/02/24]
17. Shea BJ, Bouter LM, Peterson J, et al. External validation of a measurement tool to assess systematic reviews (AMSTAR). *PloS one* 2007;2(12):e1350. doi: 10.1371/journal.pone.0001350 [published Online First: 2007/12/27]
18. Shea BJ, Reeves BC, Wells G, et al. AMSTAR 2: a critical appraisal tool for systematic reviews that include randomised or non-randomised studies of healthcare interventions, or both. *BMJ (Clinical research ed)* 2017;358 doi: 10.1136/bmj.j4008
19. Kong A, Johnson N, Kitchener HC, et al. Adjuvant radiotherapy for stage I endometrial cancer: an updated Cochrane systematic review and meta-analysis. *Journal of the National Cancer Institute* 2012;104(21):1625-34. doi: 10.1093/jnci/djs374 [published Online First: 2012/09/11]
20. Kong A, Johnson N, Kitchener HC, et al. Adjuvant radiotherapy for stage I endometrial cancer. *The Cochrane database of systematic reviews* 2012(4):Cd003916. doi: 10.1002/14651858.CD003916.pub4 [published Online First: 2012/04/20]
21. Fleming PS, Koletsis D, Seehra J, et al. Systematic reviews published in higher impact clinical journals were of higher quality. *Journal of clinical epidemiology* 2014;67(7):754-9. doi: 10.1016/j.jclinepi.2014.01.002 [published Online First: 2014/04/09]
22. Bafeta A, Trinquart L, Seror R, et al. Analysis of the systematic reviews process in reports of network meta-analyses: methodological systematic review. *BMJ (Clinical research ed)* 2013;347:f3675. doi: 10.1136/bmj.f3675 [published Online First: 2013/07/03]
23. Cullis PS, Gudlaugsdottir K, Andrews J. A systematic review of the quality of conduct and reporting of systematic reviews and meta-analyses in paediatric surgery. *PloS one* 2017;12(4):e0175213. doi: 10.1371/journal.pone.0175213 [published Online First: 2017/04/07]

- 1  
2  
3 24. Fleming PS, Seehra J, Polychronopoulou A, et al. Cochrane and non-Cochrane  
4 systematic reviews in leading orthodontic journals: a quality paradigm?  
5 *European journal of orthodontics* 2013;35(2):244-8. doi:  
6 10.1093/ejo/cjs016 [published Online First: 2012/04/19]  
7  
8 25. Adie S, Ma D, Harris IA, et al. Quality of conduct and reporting of meta-  
9 analyses of surgical interventions. *Annals of surgery* 2015;261(4):685-94.  
10 doi: 10.1097/sla.0000000000000836 [published Online First:  
11 2015/01/13]  
12  
13 26. Windsor B, Popovich I, Jordan V, et al. Methodological quality of systematic  
14 reviews in subfertility: a comparison of Cochrane and non-Cochrane  
15 systematic reviews in assisted reproductive technologies. *Human*  
16 *reproduction (Oxford, England)* 2012;27(12):3460-6. doi:  
17 10.1093/humrep/des342 [published Online First: 2012/10/05]  
18  
19 27. Shamseer L, Moher D, Clarke M, et al. Preferred reporting items for systematic  
20 review and meta-analysis protocols (PRISMA-P) 2015: elaboration and  
21 explanation. *BMJ : British Medical Journal* 2015;349 doi:  
22 10.1136/bmj.g7647  
23  
24 28. Page MJ, McKenzie JE, Kirkham J, et al. Bias due to selective inclusion and  
25 reporting of outcomes and analyses in systematic reviews of randomised  
26 trials of healthcare interventions. *The Cochrane database of systematic*  
27 *reviews* 2014(10):Mr000035. doi: 10.1002/14651858.MR000035.pub2  
28 [published Online First: 2014/10/02]  
29  
30 29. Stewart L, Moher D, Shekelle P. Why prospective registration of systematic  
31 reviews makes sense. *Systematic reviews* 2012;1:7. doi: 10.1186/2046-  
32 4053-1-7 [published Online First: 2012/05/17]  
33  
34 30. Murad M, Montori VM, Ioannidis JA, et al. How to read a systematic review and  
35 meta-analysis and apply the results to patient care: Users' guides to the  
36 medical literature. *JAMA* 2014;312(2):171-79. doi:  
37 10.1001/jama.2014.5559  
38  
39 31. Dahm P. Raising the bar for systematic reviews with Assessment of Multiple  
40 Systematic Reviews (AMSTAR). *BJU International* 2017;119(2):193-93. doi:  
41 10.1111/bju.13754  
42  
43 32. Higgins JG, S. (editors). *Cochrane Handbook for Systematic Reviews of*  
44 *Interventions* Version 5.1.0 [updated March 2011]. March 2011 ed: The  
45 Cochrane Collaboration, 2011.  
46  
47 33. Julian PT Higgins TL, Jackie Chandler, David Tovey, Rachel Churchill.  
48 *Methodological Expectations of Cochrane Intervention Reviews*. London:  
49 Cochrane 2016.  
50  
51 34. Whiting P, Savović J, Higgins JPT, et al. ROBIS: A new tool to assess risk of bias  
52 in systematic reviews was developed. *Journal of clinical*  
53 *epidemiology*;69:225-34. doi: 10.1016/j.jclinepi.2015.06.005  
54  
55  
56  
57  
58  
59  
60

**Table 1: Baseline characteristics of the included Cochrane reviews and high-impact journal SRs**

|                                                | <b>Cochrane</b>                 | <b>High-impact journals</b>                  |                                  |                            |                               |                       |                      |                    |                               |                              |
|------------------------------------------------|---------------------------------|----------------------------------------------|----------------------------------|----------------------------|-------------------------------|-----------------------|----------------------|--------------------|-------------------------------|------------------------------|
|                                                | <b>Cochrane reviews (n=346)</b> | <b>Total high-impact journal SRs (n=215)</b> | <b>J Natl Cancer Inst (n=56)</b> | <b>J Clin Oncol (n=56)</b> | <b>Lancet Oncology (n=53)</b> | <b>The BMJ (n=22)</b> | <b>Lancet (n=14)</b> | <b>JAMA (n=12)</b> | <b>CA Cancer J Clin (n=1)</b> | <b>Cancer Research (n=1)</b> |
| <b>Year first published (Number of SR (%))</b> |                                 |                                              |                                  |                            |                               |                       |                      |                    |                               |                              |
| 2011                                           | 45 (13.1)                       | 45 (20.9)                                    | 9 (16.1)                         | 14 (25)                    | 13 (24.5)                     | 2 (9.1)               | 4 (28.6)             | 3 (25)             |                               |                              |
| 2012                                           | 60 (17.3)                       | 50 (23.2)                                    | 20 (35.7)                        | 11 (19.6)                  | 11 (20.8)                     | 4 (18.2)              | 1 (7.1)              | 3 (25)             |                               |                              |
| 2013                                           | 80 (23.1)                       | 31 (14.4)                                    | 7 (12.5)                         | 8 (14.3)                   | 8 (15.1)                      | 5 (22.7)              | 2 (14.3)             | 1 (8.3)            |                               |                              |
| 2014                                           | 59 (17.1)                       | 51 (23.7)                                    | 11 (19.6)                        | 10 (17.9)                  | 15 (28.3)                     | 7 (31.8)              | 4 (28.6)             | 4 (33.3)           |                               |                              |
| 2015                                           | 69 (19.9)                       | 32 (14.9)                                    | 6 (10.7)                         | 11 (19.6)                  | 5 (9.4)                       | 4 (18.2)              | 3 (21.4)             | 1 (8.3)            | 1 (100)                       | 1 (100)                      |
| 2016                                           | 33 (9.5)                        | 6 (2.8)                                      | 3 (5.4)                          | 2 (3.6)                    | 1 (1.9)                       |                       |                      |                    |                               |                              |
| <b>Region (Number of SR (%))</b>               |                                 |                                              |                                  |                            |                               |                       |                      |                    |                               |                              |
| Europe                                         | 233 (67.3)                      | 95 (44.2)                                    | 14 (25)                          | 20 (35.7)                  | 34 (64.2)                     | 12 (54.5)             | 13 (92.9)            | 1 (8.3)            | 1 (100)                       |                              |
| North America                                  | 26 (7.5)                        | 88 (40.9)                                    | 33 (58.9)                        | 27 (48.2)                  | 10 (18.9)                     | 6 (27.3)              | 1 (7.1)              | 10 (83.3)          |                               | 1 (100)                      |
| Asia                                           | 49 (14.2)                       | 16 (7.4)                                     | 6 (10.7)                         | 3 (5.4)                    | 3 (5.7)                       | 3 (13.6)              |                      | 1 (8.3)            |                               |                              |
| Australia/<br>New Zealand                      | 19 (5.5)                        | 14 (6.5)                                     | 2 (3.6)                          | 6 (10.7)                   | 6 (11.3)                      |                       |                      |                    |                               |                              |
| South America                                  | 13 (3.8)                        | 1 (0.5)                                      | 1 (1.8)                          |                            |                               |                       |                      |                    |                               |                              |
| Africa                                         | 6 (1.7)                         | 1 (0.5)                                      |                                  |                            |                               | 1 (4.5)               |                      |                    |                               |                              |
| <b>Review type (Number of SR (%))</b>          |                                 |                                              |                                  |                            |                               |                       |                      |                    |                               |                              |
| Study-level                                    | 331 (95.7)                      | 147 (68.4)                                   | 39 (69.6)                        | 40 (71.4)                  | 35 (66)                       | 19 (86.4)             | 1 (7.1)              | 11 (91.7)          | 1 (100)                       | 1 (100)                      |

|                                                 | <b>Cochrane</b>                 | <b>High-impact journals</b>                  |                                  |                            |                               |                       |                      |                    |                               |                              |
|-------------------------------------------------|---------------------------------|----------------------------------------------|----------------------------------|----------------------------|-------------------------------|-----------------------|----------------------|--------------------|-------------------------------|------------------------------|
|                                                 | <b>Cochrane reviews (n=346)</b> | <b>Total high-impact journal SRs (n=215)</b> | <b>J Natl Cancer Inst (n=56)</b> | <b>J Clin Oncol (n=56)</b> | <b>Lancet Oncology (n=53)</b> | <b>The BMJ (n=22)</b> | <b>Lancet (n=14)</b> | <b>JAMA (n=12)</b> | <b>CA Cancer J Clin (n=1)</b> | <b>Cancer Research (n=1)</b> |
| data                                            |                                 |                                              |                                  |                            |                               |                       |                      |                    |                               |                              |
| IPD                                             | 3 (0.9)                         | 67 (31.2)                                    | 17 (30.4)                        | 15 (26.8)                  | 18 (34)                       | 3 (13.6)              | 13 (92.9)            | 1 (8.3)            |                               |                              |
| Both                                            | 12 (3.5)                        | 1 (0.5)                                      |                                  | 1 (1.8)                    |                               |                       |                      |                    |                               |                              |
| <b>Network Meta-Analysis (Number of SR (%))</b> | 2 (0.6)                         | 6 (2.8)                                      | 3 (5.4)                          |                            | 3 (5.7)                       |                       |                      |                    |                               |                              |
| <b>Study type (Number of SR (%))</b>            |                                 |                                              |                                  |                            |                               |                       |                      |                    |                               |                              |
| RCT                                             | 264 (76.3)                      | 75 (34.9)                                    | 15 (26.8)                        | 21 (37.5)                  | 14 (26.4)                     | 7 (31.8)              | 12 (85.7)            | 5 (41.7)           | 1 (100)                       |                              |
| non-RCT                                         | 5 (1.4)                         | 85 (39.5)                                    | 27 (48.2)                        | 16 (28.6)                  | 27 (50.9)                     | 12 (54.5)             | 1 (7.1)              | 2 (16.7)           |                               |                              |
| Both                                            | 77 (22.3)                       | 46 (21.4)                                    | 9 (16.1)                         | 19 (33.9)                  | 9 (17)                        | 3 (13.6)              | 1 (7.1)              | 5 (41.7)           |                               |                              |
| Unclear                                         |                                 | 9 (4.2)                                      | 5 (8.9)                          |                            | 3 (5.7)                       |                       |                      |                    |                               | 1 (100)                      |
| <b>Population (Number of SR (%))</b>            |                                 |                                              |                                  |                            |                               |                       |                      |                    |                               |                              |
| Adult                                           | 318 (9.9)                       | 151 (70.2)                                   | 39 (69.6)                        | 43 (76.8)                  | 32 (60.4)                     | 14 (63.6)             | 13 (92.9)            | 9 (75)             | 1 (100)                       |                              |
| Paediatric                                      | 26 (7.5)                        | 6 (2.8)                                      | 1 (1.8)                          | 1 (1.8)                    | 4 (7.5)                       |                       |                      |                    |                               |                              |
| Both                                            | 2 (0.6)                         | 22 (10.2)                                    | 5 (8.9)                          | 6 (10.7)                   | 7 (13.2)                      | 4 (18.2)              |                      |                    |                               |                              |
| Unclear                                         |                                 | 36 (16.7)                                    | 11 (19.6)                        | 6 (10.7)                   | 10 (18.9)                     | 4 (18.2)              | 1 (7.1)              | 3 (25)             |                               | 1 (100)                      |
| <b>Included studies (Median (IQR))</b>          | 6 (2-13)                        | 18 (10-38,8)                                 | 20 (12-43.8)                     | 16 (9-36.3)                | 24 (12.8-44.8)                | 16 (9.6-26.5)         | 16 (25-9.8)          | 16.5 (10.3-24.8)   | 14                            | 37                           |



|                                         | <b>Cochrane</b>                 | <b>High-impact journals</b>                  |                                  |                            |                               |                            |                              |                             |                               |                              |
|-----------------------------------------|---------------------------------|----------------------------------------------|----------------------------------|----------------------------|-------------------------------|----------------------------|------------------------------|-----------------------------|-------------------------------|------------------------------|
|                                         | <b>Cochrane reviews (n=346)</b> | <b>Total high-impact journal SRs (n=215)</b> | <b>J Natl Cancer Inst (n=56)</b> | <b>J Clin Oncol (n=56)</b> | <b>Lancet Oncology (n=53)</b> | <b>The BMJ (n=22)</b>      | <b>Lancet (n=14)</b>         | <b>JAMA (n=12)</b>          | <b>CA Cancer J Clin (n=1)</b> | <b>Cancer Research (n=1)</b> |
| <b>Included patients (Median (IQR))</b> | 1020<br>(194.5-2845)            | 7730<br>(3288-29423)                         | 8216<br>(3288-35568)             | 4758,5<br>(184.5-11091.8)  | 4600<br>(3033-21137)          | 117597<br>(10903-890992.3) | 21471.5<br>(13287.5-45195.8) | 12813.5<br>(4075.5-48067.3) | 3377                          | Not reported                 |
| <b>Citations (Median (IQR))</b>         | 3<br>(1-7)                      | 46<br>(18,5-86,5)                            | 30.5<br>(9.8-55.3)               | 48,5<br>(18-70.3)          | 40<br>(22-97)                 | 40<br>(15-80.3)            | 157<br>(54-351.8)            | 101<br>(45.3-155.8)         | 8                             | 15                           |

SR= systematic review, IPD= Individual Patient Data, J Natl Cancer Inst= Journal of the National Cancer Institute, J Clin Oncol= Journal of Clinical Oncology, CA Cancer J Clin= A Cancer Journal for Clinicians, Cancer Res= Cancer Research, RCT=randomised controlled trial, IQR= interquartile range

1  
2  
3  
4  
5  
6  
7  
8  
9  
10  
11  
12  
13  
14  
15  
16  
17  
18  
19  
20  
21  
22  
23  
24  
25  
26  
27  
28  
29  
30  
31  
32  
33  
34  
35  
36  
37  
38  
39  
40  
41  
42  
43  
44  
45  
46  
47  
48  
49  
50  
51  
52  
53  
54  
55  
56  
57  
58  
59  
60

For peer review only

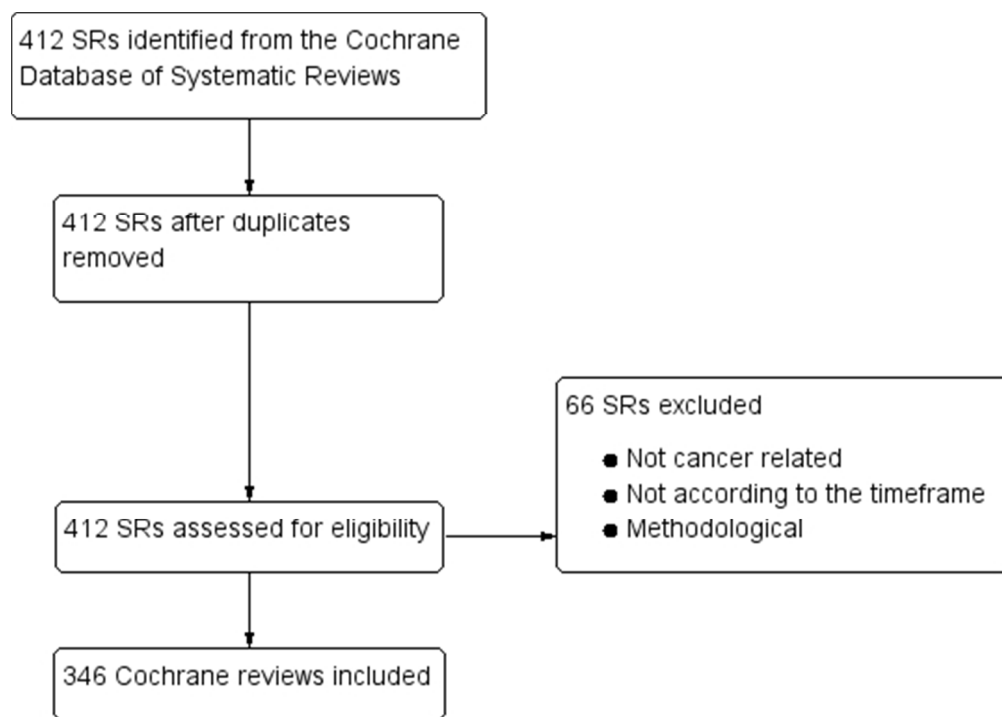

30 Figure 1. PRISMA flow diagram of Cochrane reviews

31 45x32mm (300 x 300 DPI)

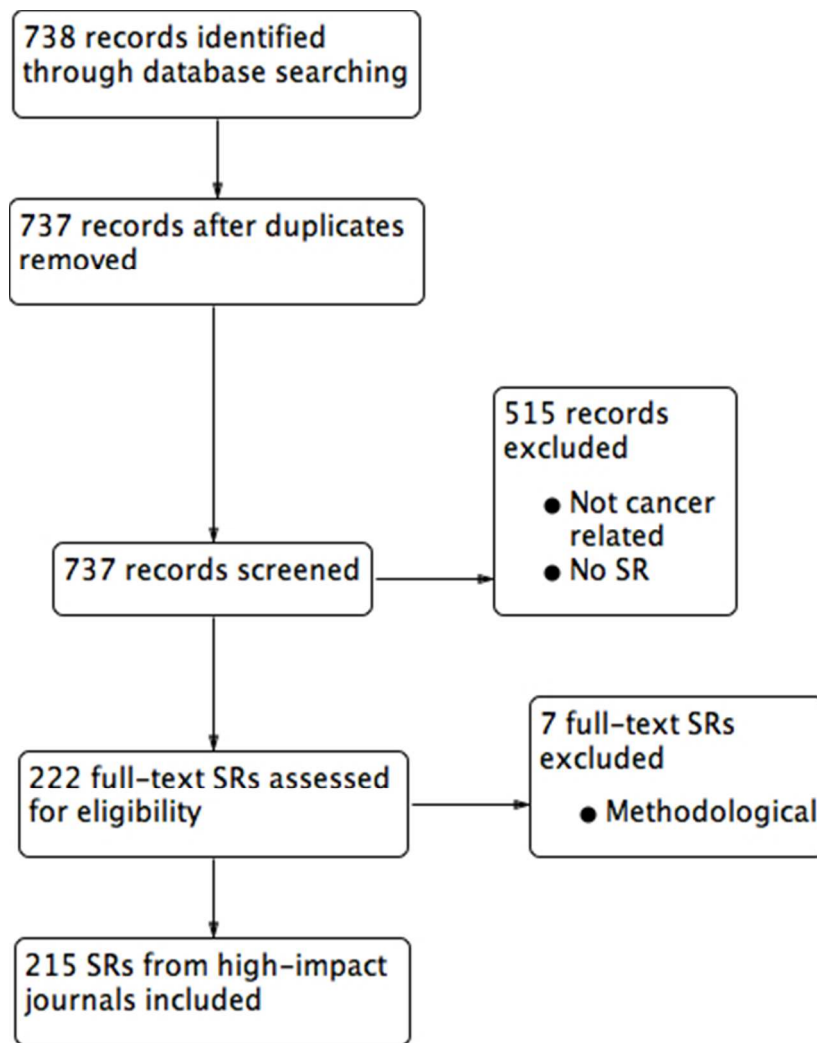

Figure 2. PRISMA flow diagram of high-impact journal SRs

34x43mm (300 x 300 DPI)

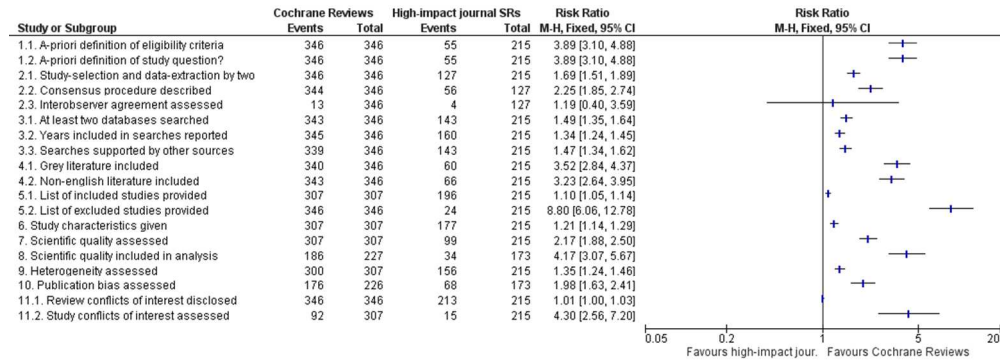

Figure 3. Forrest plot comparing to what extent Cochrane reviews and SRs published in high-impact journals meet criteria for methodological quality

89x32mm (300 x 300 DPI)

Peer review only

1  
2  
3  
4  
5  
6  
7  
8  
9  
10  
11  
12  
13  
14  
15  
16  
17  
18  
19  
20  
21  
22  
23  
24  
25  
26  
27  
28  
29  
30  
31  
32  
33  
34  
35  
36  
37  
38  
39  
40  
41  
42  
43  
44  
45  
46  
47  
48  
49  
50  
51  
52  
53  
54  
55  
56  
57  
58  
59  
60

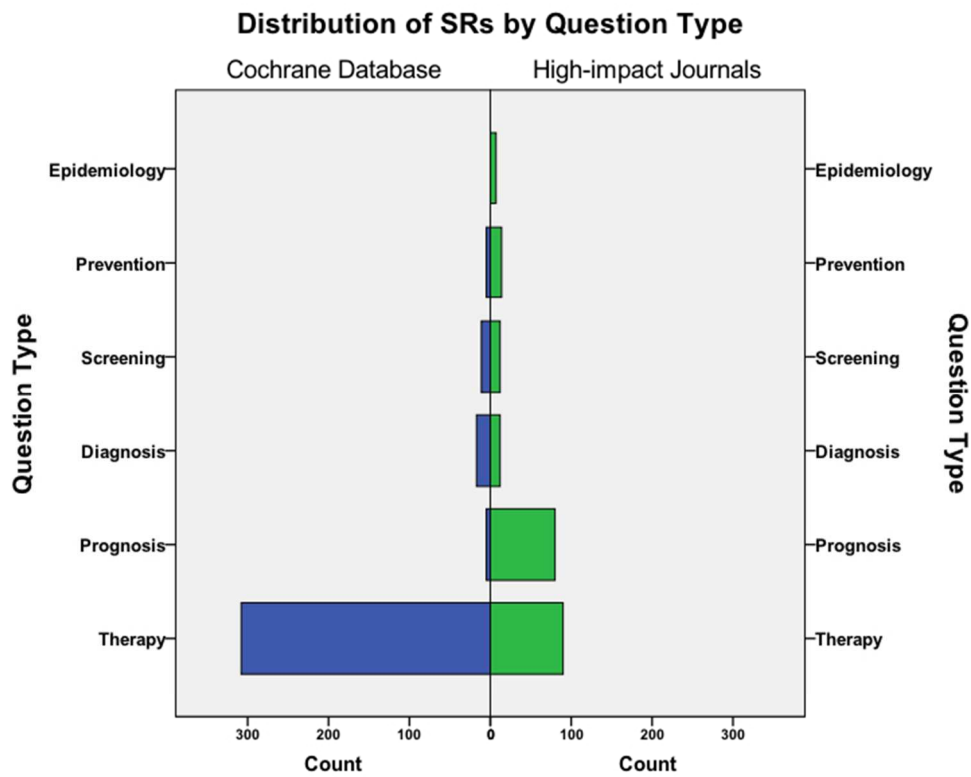

Figure 4. Distribution of Cochrane reviews and high-impact journal SRs by review question

63x50mm (300 x 300 DPI)

1  
2  
3  
4  
5  
6  
7  
8  
9  
10  
11  
12  
13  
14  
15  
16  
17  
18  
19  
20  
21  
22  
23  
24  
25  
26  
27  
28  
29  
30  
31  
32  
33  
34  
35  
36  
37  
38  
39  
40  
41  
42  
43  
44  
45  
46  
47  
48  
49  
50  
51  
52  
53  
54  
55  
56  
57  
58  
59  
60



Figure 5. Distribution of Cochrane reviews and high-impact journal SRs by disease

69x55mm (300 x 300 DPI)

View only

1  
2  
3  
4  
5  
6  
7  
8  
9  
10  
11  
12  
13  
14  
15  
16  
17  
18  
19  
20  
21  
22  
23  
24  
25  
26  
27  
28  
29  
30  
31  
32  
33  
34  
35  
36  
37  
38  
39  
40  
41  
42  
43  
44  
45  
46  
47  
48  
49  
50  
51  
52  
53  
54  
55  
56  
57  
58  
59  
60

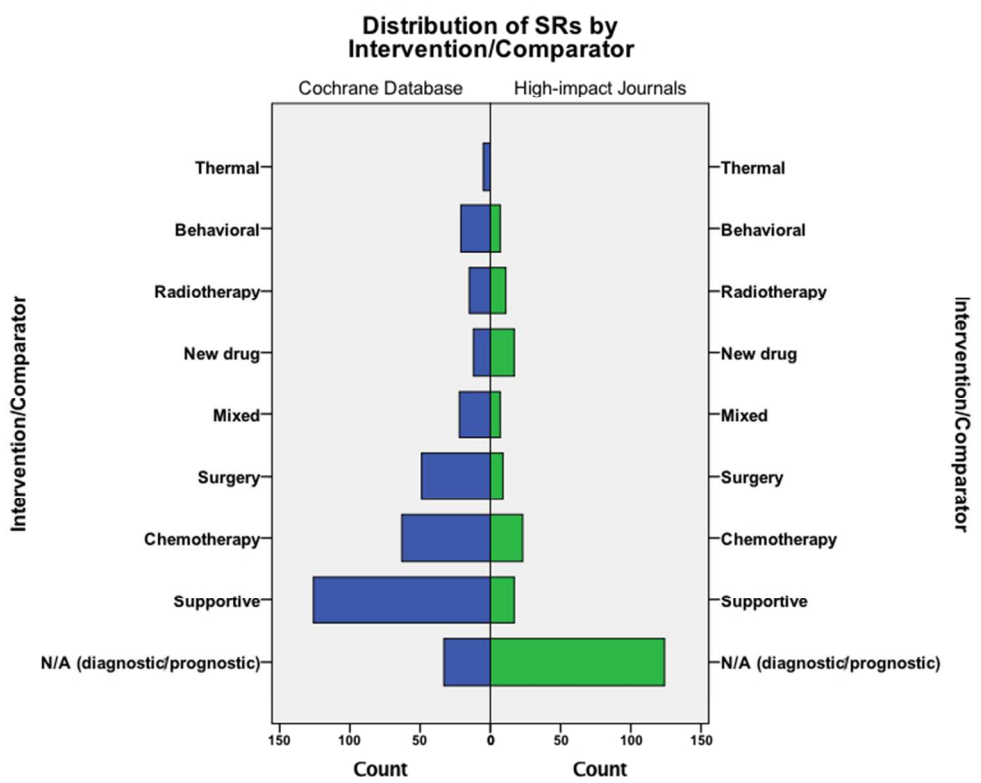

Figure 6. Distribution of Cochrane reviews and high-impact journal SRs by intervention

66x53mm (300 x 300 DPI)





1  
2  
3  
4  
5  
6  
7  
8  
9  
10  
11  
12  
13  
14  
15  
16  
17  
18  
19  
20  
21  
22  
23  
24  
25  
26  
27  
28  
29  
30  
31  
32  
33  
34  
35  
36  
37  
38  
39  
40  
41  
42  
43  
44  
45  
46  
47  
48  
49  
50  
51  
52  
53  
54  
55  
56  
57  
58  
59  
60

[#6](#) Search (#4 or #7) Filters: Publication date from 2011/01/01 to 2016/05/31

---

---

For peer review only

**Appendix table 2: Extracted items**

| Item | Extracted                      | Example                                                                                                                                                                                                                                           |
|------|--------------------------------|---------------------------------------------------------------------------------------------------------------------------------------------------------------------------------------------------------------------------------------------------|
| 1.   | Author                         |                                                                                                                                                                                                                                                   |
| 2.   | Title                          |                                                                                                                                                                                                                                                   |
| 3.   | Journal                        | Cochrane, A Cancer Journal for Clinicians, New England Journal of Medicine, The Lancet, JAMA, Lancet Oncology, Journal of Clinical Oncology, The BMJ, Nature Reviews Clinical Oncology, Journal of the National Cancer Institute, Cancer Research |
| 4.   | Year last updated              | 2011-2016                                                                                                                                                                                                                                         |
| 5.   | Year first published           | 2011-2016                                                                                                                                                                                                                                         |
| 6.   | Cochrane group                 |                                                                                                                                                                                                                                                   |
| 7.   | Region of corresponding author | Africa, Asia, Australia/ New Zealand, Europe, North America, South America                                                                                                                                                                        |
| 8.   | Review type                    | SR based on trial-level data, Individual Patient Data SR, Both                                                                                                                                                                                    |
| 9.   | Network Meta-Analysis          | Yes, No                                                                                                                                                                                                                                           |
| 10.  | Included study type            | RCTs, non-RCTs, Both                                                                                                                                                                                                                              |
| 11.  | Question type                  | Diagnosis, Epidemiology, Prevention,                                                                                                                                                                                                              |

| Item | Extracted                  | Example                                                                                                                                                                                                                                                                                                                                 |
|------|----------------------------|-----------------------------------------------------------------------------------------------------------------------------------------------------------------------------------------------------------------------------------------------------------------------------------------------------------------------------------------|
|      |                            | Prognosis, Screening, Therapy                                                                                                                                                                                                                                                                                                           |
| 12.  | Disease                    | Bladder, bones (incl. spine), brain (incl. CNS), breast, cancer in general, cervical, colorectal, endometrial, oesophagus, gastric, haematological (leukaemia, lymphoma, myeloma), head and neck, lung, melanoma, mixed (but not general, other (e.g. male breast cancer, liver metastases), ovarian, pancreas, prostate, renal, uterus |
| 13.  | Intervention               | Behavioural (e.g. exercise, diet, smoking), chemotherapy, mixed interventions, “new drug” (targeted therapy and monoclonal antibodies), radiotherapy, supportive, surgery, thermal (e.g. hyperthermia, cryotherapy), not applicable (if diagnostic, prognostic, preventive, epidemiologic, screening)                                   |
| 14.  | Population                 | Adult, paediatric, both                                                                                                                                                                                                                                                                                                                 |
| 15.  | Number of included studies |                                                                                                                                                                                                                                                                                                                                         |
| 16.  | Number included patients   |                                                                                                                                                                                                                                                                                                                                         |

**Appendix table 3: Extracted quality indicators**

| Item | AMSTAR                                                                               | This work                                                                                    |
|------|--------------------------------------------------------------------------------------|----------------------------------------------------------------------------------------------|
| 1.   | Was an 'a priori' design provided                                                    | Was the review question established before the conduct of the review?                        |
|      |                                                                                      | Were the in- and exclusion criteria defined before the conduct of the review?                |
| 2.   | Was there duplicate study selection and data extraction?                             | Was the study selection and data-extraction undertaken by two independently working authors? |
|      |                                                                                      | Was the consensus procedure described?                                                       |
|      |                                                                                      | Was the interobserver-agreement (quantitatively) assessed?                                   |
| 3.   | Was a comprehensive literature search performed?                                     | Were at least two electronic databases searched?                                             |
|      |                                                                                      | Were the years included in the searches reported?                                            |
|      |                                                                                      | Were the database searches supported by other sources?                                       |
| 4.   | Was the status of publication (i.e. grey literature) used as an inclusion criterion? | Were reviews irrespective of publication status included?                                    |
|      |                                                                                      | Were reviews in languages other than English                                                 |

| Item | AMSTAR                                                                                            | This work                                                                                                                             |
|------|---------------------------------------------------------------------------------------------------|---------------------------------------------------------------------------------------------------------------------------------------|
|      |                                                                                                   | included?                                                                                                                             |
| 5.   | Was a list of studies (included and excluded) provided?                                           | Was a list of included studies provided?<br>Was a list of excluded studies provided?                                                  |
| 6.   | Were the characteristics of the included studies provided?                                        | Were study characteristic of every included study included?                                                                           |
| 7.   | Was the scientific quality of the included studies assessed and documented?                       | Was the quality of included studies included by available tools<br><br>(e.g. Cochrane's Risk of Bias, ROBINS, Newcastle-Ottawa scale) |
| 8.   | Was the scientific quality of the included studies used appropriately in formulating conclusions? | If a Meta-analysis was performed: Was the study quality included into the analysis via sensitivity- or subgroup analysis?             |
| 9.   | Were the methods used to combine the findings of studies appropriate?                             | Was possible heterogeneity assessed?                                                                                                  |
| 10.  | Was the likelihood of publication bias assessed?                                                  | Was possible publication bias formally assessed?                                                                                      |
| 11.  | Was the conflict of interest included?                                                            | Were possible Conflicts of Interest regarding the review disclosed?                                                                   |

| Item | AMSTAR | This work                                                             |
|------|--------|-----------------------------------------------------------------------|
|      |        | Were possible Conflicts of Interest of the included studies reported? |

For peer review only

## References

### References of assessed reviews

#### *Cochrane reviews*

1. Abdel-Rahman Omar M, Elsayed Z. Yttrium-90 microsphere radioembolisation for unresectable hepatocellular carcinoma. Cochrane Database of Systematic Reviews 2016; (2).  
<http://onlinelibrary.wiley.com/doi/10.1002/14651858.CD011313.pub2/abstract>.
2. Abdul Razak Albiruni R, Li L, Bryant A, et al. Chemotherapy for malignant germ cell ovarian cancer in adult patients with early stage, advanced and recurrent disease. Cochrane Database of Systematic Reviews 2011; (3).  
<http://onlinelibrary.wiley.com/doi/10.1002/14651858.CD007584.pub2/abstract>.
3. Aghoram R, Cai P, Dickinson James A. Alpha-foetoprotein and/or liver ultrasonography for screening of hepatocellular carcinoma in patients with chronic hepatitis B. Cochrane Database of Systematic Reviews 2012; (9).  
<http://onlinelibrary.wiley.com/doi/10.1002/14651858.CD002799.pub2/abstract>.
4. Akl Elie A, Kahale L, Terrenato I, et al. Oral anticoagulation in patients with cancer who have no therapeutic or prophylactic indication for anticoagulation. Cochrane Database of Systematic Reviews 2014; (7).  
<http://onlinelibrary.wiley.com/doi/10.1002/14651858.CD006466.pub5/abstract>.



- 1  
2  
3 5. Akl Elie A, Kahale Lara A, Ballout Rami A, et al. Parenteral anticoagulation in  
4  
5 ambulatory patients with cancer. Cochrane Database of Systematic Reviews  
6  
7 2014; (12).  
8  
9 <http://onlinelibrary.wiley.com/doi/10.1002/14651858.CD006652.pub4/abstract>  
10  
11  
12  
13  
14
- 15 6. Akl Elie A, Kahale Lara A, Barba M, et al. Anticoagulation for the long-term treatment  
16  
17 of venous thromboembolism in patients with cancer. Cochrane Database of  
18  
19 Systematic Reviews 2014; (7).  
20  
21 <http://onlinelibrary.wiley.com/doi/10.1002/14651858.CD006650.pub4/abstract>  
22  
23  
24  
25  
26
- 27 7. Akl Elie A, Kahale Lara A, Neumann I, et al. Anticoagulation for the initial treatment of  
28  
29 venous thromboembolism in patients with cancer. Cochrane Database of  
30  
31 Systematic Reviews 2014; (6).  
32  
33 <http://onlinelibrary.wiley.com/doi/10.1002/14651858.CD006649.pub6/abstract>  
34  
35  
36  
37  
38
- 39 8. Akl Elie A, Kahale Lara A, Sperati F, et al. Low molecular weight heparin versus  
40  
41 unfractionated heparin for perioperative thromboprophylaxis in patients with  
42  
43 cancer. Cochrane Database of Systematic Reviews 2014; (6).  
44  
45 <http://onlinelibrary.wiley.com/doi/10.1002/14651858.CD009447.pub2/abstract>  
46  
47  
48  
49
- 50 9. Akl Elie A, Ramly Elie P, Kahale Lara A, et al. Anticoagulation for people with cancer  
51  
52 and central venous catheters. Cochrane Database of Systematic Reviews 2014;  
53  
54 (10).  
55  
56 <http://onlinelibrary.wiley.com/doi/10.1002/14651858.CD006468.pub5/abstract>  
57  
58  
59  
60

- 1  
2  
3 10. Al Rawahi T, Lopes Alberto D, Bristow Robert E, et al. Surgical cytoreduction for  
4 recurrent epithelial ovarian cancer. Cochrane Database of Systematic Reviews  
5  
6  
7  
8 2013; (2).  
9  
10 <http://onlinelibrary.wiley.com/doi/10.1002/14651858.CD008765.pub3/abstract>  
11  
12  
13 t.
- 14  
15 11. Alazzam Mi, Tidy J, Osborne R, et al. Chemotherapy for resistant or recurrent  
16 gestational trophoblastic neoplasia. Cochrane Database of Systematic Reviews  
17  
18  
19 2016; (1).  
20  
21 <http://onlinelibrary.wiley.com/doi/10.1002/14651858.CD008891.pub3/abstract>  
22  
23  
24 t.
- 25  
26  
27 12. Amarasena Isuru U, Chatterjee S, Walters Julia AE, et al. Platinum versus non-  
28 platinum chemotherapy regimens for small cell lung cancer. Cochrane Database  
29  
30  
31 of Systematic Reviews 2015; (8).  
32  
33 <http://onlinelibrary.wiley.com/doi/10.1002/14651858.CD006849.pub3/abstract>  
34  
35  
36 t.
- 37  
38  
39 13. Ang C, Bryant A, Barton Desmond PJ, et al. Exenterative surgery for recurrent  
40 gynaecological malignancies. Cochrane Database of Systematic Reviews 2014;  
41  
42  
43 (2).  
44  
45 <http://onlinelibrary.wiley.com/doi/10.1002/14651858.CD010449.pub2/abstract>  
46  
47  
48 t.
- 49  
50  
51 14. Ang C, Chan Karen KL, Bryant A, et al. Ultra-radical (extensive) surgery versus  
52 standard surgery for the primary cytoreduction of advanced epithelial ovarian  
53  
54  
55 cancer. Cochrane Database of Systematic Reviews 2011; (4).  
56  
57 <http://onlinelibrary.wiley.com/doi/10.1002/14651858.CD007697.pub2/abstract>  
58  
59  
60 t.

- 1  
2  
3 15. Anglemeyer A, Agrawal Anurag K, Rutherford George W. Treatment of Kaposi sarcoma  
4  
5 in children with HIV-1 infection. Cochrane Database of Systematic Reviews 2014;  
6  
7 (1).  
8  
9  
10 <http://onlinelibrary.wiley.com/doi/10.1002/14651858.CD009826.pub2/abstract>  
11  
12  
13  
14  
15 16. Arbyn M, Roelens J, Simoens C, et al. Human papillomavirus testing versus repeat  
16  
17 cytology for triage of minor cytological cervical lesions. Cochrane Database of  
18  
19 Systematic Reviews 2013; (3).  
20  
21  
22 <http://onlinelibrary.wiley.com/doi/10.1002/14651858.CD008054.pub2/abstract>  
23  
24  
25  
26  
27 17. Archampong D, Borowski D, Wille-Jørgensen P, et al. Workload and surgeon's  
28  
29 specialty for outcome after colorectal cancer surgery. Cochrane Database of  
30  
31 Systematic Reviews 2012; (3).  
32  
33  
34 <http://onlinelibrary.wiley.com/doi/10.1002/14651858.CD005391.pub3/abstract>  
35  
36  
37  
38  
39 18. Arcidiacono Paolo G, Calori G, Carrara S, et al. Celiac plexus block for pancreatic  
40  
41 cancer pain in adults. Cochrane Database of Systematic Reviews 2011; (3).  
42  
43  
44 <http://onlinelibrary.wiley.com/doi/10.1002/14651858.CD007519.pub2/abstract>  
45  
46  
47  
48 19. Baalbergen A, Veenstra Y, Stalpers L. Primary surgery versus primary radiotherapy  
49  
50 with or without chemotherapy for early adenocarcinoma of the uterine cervix.  
51  
52 Cochrane Database of Systematic Reviews 2013; (1).  
53  
54  
55 <http://onlinelibrary.wiley.com/doi/10.1002/14651858.CD006248.pub3/abstract>  
56  
57  
58  
59  
60

- 1  
2  
3 20. Bala Malgorzata M, Riemsma Robert P, Wolff R, et al. Microwave coagulation for liver  
4 metastases. Cochrane Database of Systematic Reviews 2013; (10).  
5  
6 <http://onlinelibrary.wiley.com/doi/10.1002/14651858.CD010163.pub2/abstract>  
7  
8  
9  
10  
11  
12 21. Bala Malgorzata M, Riemsma Robert P, Wolff R, et al. Cryotherapy for liver  
13 metastases. Cochrane Database of Systematic Reviews 2013; (6).  
14  
15 <http://onlinelibrary.wiley.com/doi/10.1002/14651858.CD009058.pub2/abstract>  
16  
17  
18  
19  
20  
21  
22 22. Balduzzi S, Mantarro S, Guarneri V, et al. Trastuzumab-containing regimens for  
23 metastatic breast cancer. Cochrane Database of Systematic Reviews 2014; (6).  
24  
25 <http://onlinelibrary.wiley.com/doi/10.1002/14651858.CD006242.pub2/abstract>  
26  
27  
28  
29  
30  
31 23. Barone Damiano G, Lawrie Theresa A, Hart Michael G. Image guided surgery for the  
32 resection of brain tumours. Cochrane Database of Systematic Reviews 2014; (1).  
33  
34 <http://onlinelibrary.wiley.com/doi/10.1002/14651858.CD009685.pub2/abstract>  
35  
36  
37  
38  
39  
40 24. Bath-Hextall Fiona J, Matin Rubeta N, Wilkinson D, et al. Interventions for cutaneous  
41 Bowen's disease. Cochrane Database of Systematic Reviews 2013; (6).  
42  
43 <http://onlinelibrary.wiley.com/doi/10.1002/14651858.CD007281.pub2/abstract>  
44  
45  
46  
47  
48  
49 25. Bauer K, Rancea M, Roloff V, et al. Rituximab, ofatumumab and other monoclonal  
50 anti-CD20 antibodies for chronic lymphocytic leukaemia. Cochrane Database of  
51 Systematic Reviews 2012; (11).  
52  
53 <http://onlinelibrary.wiley.com/doi/10.1002/14651858.CD008079.pub2/abstract>  
54  
55  
56  
57  
58  
59  
60

- 1  
2  
3 26. Bauer K, Skoetz N, Monsef I, et al. Comparison of first-line chemotherapy including  
4  
5 escalated BEACOPP versus chemotherapy including ABVD for people with early  
6  
7 unfavourable or advanced stage Hodgkin lymphoma. Cochrane Database of  
8  
9 Systematic Reviews 2011; (5).  
10  
11 <http://onlinelibrary.wiley.com/doi/10.1002/14651858.CD007941.pub3/abstract>  
12  
13  
14  
15 t.
- 16  
17 27. Bell Rae F, Eccleston C, Kalso Eija A. Ketamine as an adjuvant to opioids for cancer  
18  
19 pain. Cochrane Database of Systematic Reviews 2012; (6).  
20  
21 <http://onlinelibrary.wiley.com/doi/10.1002/14651858.CD003351.pub3/abstract>  
22  
23  
24  
25 t.
- 26  
27 28. Bennett C, Green S, DeCaestecker J, et al. Surgery versus radical endotherapies for  
28  
29 early cancer and high-grade dysplasia in Barrett's oesophagus. Cochrane  
30  
31 Database of Systematic Reviews 2012; (11).  
32  
33 <http://onlinelibrary.wiley.com/doi/10.1002/14651858.CD007334.pub4/abstract>  
34  
35  
36  
37 t.
- 38  
39 29. Bennett Michael H, Feldmeier J, Smee R, et al. Hyperbaric oxygenation for tumour  
40  
41 sensitisation to radiotherapy. Cochrane Database of Systematic Reviews 2012;  
42  
43 (4).  
44  
45 <http://onlinelibrary.wiley.com/doi/10.1002/14651858.CD005007.pub3/abstract>  
46  
47  
48  
49 t.
- 50  
51 30. Bergenthal N, Will A, Streckmann F, et al. Aerobic physical exercise for adult patients  
52  
53 with haematological malignancies. Cochrane Database of Systematic Reviews  
54  
55 2014; (11).  
56  
57 <http://onlinelibrary.wiley.com/doi/10.1002/14651858.CD009075.pub2/abstract>  
58  
59  
60 t.

- 1  
2  
3 31. Bergner N, Monsef I, Illerhaus G, et al. Role of chemotherapy additional to high-dose  
4 methotrexate for primary central nervous system lymphoma (PCNSL). Cochrane  
5 Database of Systematic Reviews 2012; (11).  
6  
7  
8  
9  
10 <http://onlinelibrary.wiley.com/doi/10.1002/14651858.CD009355.pub2/abstract>  
11  
12  
13  
14
- 15 32. Bessell A, Glennon A-M, Furness S, et al. Interventions for the treatment of oral and  
16 oropharyngeal cancers: surgical treatment. Cochrane Database of Systematic  
17 Reviews 2011; (9).  
18  
19  
20  
21  
22 <http://onlinelibrary.wiley.com/doi/10.1002/14651858.CD006205.pub3/abstract>  
23  
24  
25  
26
- 27 33. Best Lawrence MJ, Mughal M, Gurusamy Kurinchi S. Laparoscopic versus open  
28 gastrectomy for gastric cancer. Cochrane Database of Systematic Reviews 2016;  
29 (3).  
30  
31  
32  
33 <http://onlinelibrary.wiley.com/doi/10.1002/14651858.CD011389.pub2/abstract>  
34  
35  
36  
37
- 38 34. Best Lawrence MJ, Mughal M, Gurusamy Kurinchi S. Non-surgical versus surgical  
39 treatment for oesophageal cancer. Cochrane Database of Systematic Reviews  
40 2016; (3).  
41  
42  
43  
44  
45 <http://onlinelibrary.wiley.com/doi/10.1002/14651858.CD011498.pub2/abstract>  
46  
47  
48  
49
- 50 35. Billson Hazel A, Holland C, Curwell J, et al. Perioperative nutrition interventions for  
51 women with ovarian cancer. Cochrane Database of Systematic Reviews 2013; (9).  
52  
53  
54  
55 <http://onlinelibrary.wiley.com/doi/10.1002/14651858.CD009884.pub2/abstract>  
56  
57  
58  
59  
60

- 1  
2  
3 36. Bjelakovic G, Gluud Lise L, Nikolova D, et al. Vitamin D supplementation for  
4 prevention of cancer in adults. Cochrane Database of Systematic Reviews 2014;  
5  
6  
7 (6).  
8  
9  
10 <http://onlinelibrary.wiley.com/doi/10.1002/14651858.CD007469.pub2/abstract>  
11  
12  
13  
14  
15 37. Bleeker G, Tytgat Godelieve AM, Adam Judit A, et al. 123I-MIBG scintigraphy and  
16  
17 18F-FDG-PET imaging for diagnosing neuroblastoma. Cochrane Database of  
18 Systematic Reviews 2015; (9).  
19  
20  
21 <http://onlinelibrary.wiley.com/doi/10.1002/14651858.CD009263.pub2/abstract>  
22  
23  
24  
25  
26  
27 38. Bourke L, Homer Kate E, Thaha Mohamed A, et al. Interventions for promoting  
28  
29 habitual exercise in people living with and beyond cancer. Cochrane Database of  
30 Systematic Reviews 2013; (9).  
31  
32  
33 <http://onlinelibrary.wiley.com/doi/10.1002/14651858.CD010192.pub2/abstract>  
34  
35  
36  
37  
38  
39 39. Braam Katja I, van der Torre P, Takken T, et al. Physical exercise training  
40  
41 interventions for children and young adults during and after treatment for  
42  
43 childhood cancer. Cochrane Database of Systematic Reviews 2016; (3).  
44  
45  
46 <http://onlinelibrary.wiley.com/doi/10.1002/14651858.CD008796.pub3/abstract>  
47  
48  
49  
50  
51 40. Bradt J, Shim M, Goodill Sherry W. Dance/movement therapy for improving  
52  
53 psychological and physical outcomes in cancer patients. Cochrane Database of  
54 Systematic Reviews 2015; (1).  
55  
56  
57 <http://onlinelibrary.wiley.com/doi/10.1002/14651858.CD007103.pub3/abstract>  
58  
59  
60

- 1  
2  
3 41. Brockbank E, Kokka F, Bryant A, et al. Pre-treatment surgical para-aortic lymph node  
4  
5 assessment in locally advanced cervical cancer. Cochrane Database of Systematic  
6  
7 Reviews 2013; (3).  
8  
9 <http://onlinelibrary.wiley.com/doi/10.1002/14651858.CD008217.pub3/abstract>  
10  
11  
12  
13  
14  
15 42. Brocklehurst P, Kujan O, O'Malley Lucy A, et al. Screening programmes for the early  
16  
17 detection and prevention of oral cancer. Cochrane Database of Systematic  
18  
19 Reviews 2013; (11).  
20  
21 <http://onlinelibrary.wiley.com/doi/10.1002/14651858.CD004150.pub4/abstract>  
22  
23  
24  
25  
26  
27 43. Burdett S, Pignon Jean P, Tierney J, et al. Adjuvant chemotherapy for resected early-  
28  
29 stage non-small cell lung cancer. Cochrane Database of Systematic Reviews 2015;  
30  
31 (3). <http://onlinelibrary.wiley.com/doi/10.1002/14651858.CD011430/abstract>.  
32  
33  
34 44. Cakmakkaya Ozlem S, Kolodzie K, Apfel Christian C, et al. Anaesthetic techniques for  
35  
36 risk of malignant tumour recurrence. Cochrane Database of Systematic Reviews  
37  
38 2014; (11).  
39  
40 <http://onlinelibrary.wiley.com/doi/10.1002/14651858.CD008877.pub2/abstract>  
41  
42  
43  
44  
45 45. Candy B, Jones L, Vickerstaff V, et al. Interventions for sexual dysfunction following  
46  
47 treatments for cancer in women. Cochrane Database of Systematic Reviews 2016;  
48  
49 (2).  
50  
51 <http://onlinelibrary.wiley.com/doi/10.1002/14651858.CD005540.pub3/abstract>  
52  
53  
54  
55  
56  
57 46. Carvalho Alan PV, Vital Flávia MR, Soares Bernardo GO. Exercise interventions for  
58  
59 shoulder dysfunction in patients treated for head and neck cancer. Cochrane  
60



1  
2  
3 Database of Systematic Reviews 2012; (4).

4 <http://onlinelibrary.wiley.com/doi/10.1002/14651858.CD008693.pub2/abstract>  
5  
6  
7  
8 t.

9  
10 47. Cavalheri V, Tahirah F, Nonoyama Mika L, et al. Exercise training undertaken by  
11  
12 people within 12 months of lung resection for non-small cell lung cancer.

13  
14  
15 Cochrane Database of Systematic Reviews 2013; (7).

16  
17 <http://onlinelibrary.wiley.com/doi/10.1002/14651858.CD009955.pub2/abstract>  
18  
19  
20 t.

21  
22 48. Chan Benjamin KY, Wiseberg-Firtell Jill A, Jois Ramesh HS, et al. Localization

23  
24 techniques for guided surgical excision of non-palpable breast lesions. Cochrane  
25  
26 Database of Systematic Reviews 2015; (12).

27  
28 <http://onlinelibrary.wiley.com/doi/10.1002/14651858.CD009206.pub2/abstract>  
29  
30  
31 t.

32  
33 49. Chan Kelvin KW, Glenny A-M, Weldon Jo C, et al. Interventions for the treatment of

34  
35 oral and oropharyngeal cancers: targeted therapy and immunotherapy. Cochrane  
36  
37 Database of Systematic Reviews 2015; (12).

38  
39 <http://onlinelibrary.wiley.com/doi/10.1002/14651858.CD010341.pub2/abstract>  
40  
41  
42  
43 t.

44  
45 50. Charoenkwan K, Kietpeerakool C. Retroperitoneal drainage versus no drainage after  
46  
47 pelvic lymphadenectomy for the prevention of lymphocyst formation in women

48  
49 with gynaecological malignancies. Cochrane Database of Systematic Reviews  
50  
51 2016; (6).

52  
53 <http://onlinelibrary.wiley.com/doi/10.1002/14651858.CD007387.pub4/abstract>  
54  
55  
56  
57 t.

- 1  
2  
3 51. Chen H, Li J, Cui T, et al. Adjuvant gonadotropin-releasing hormone analogues for the  
4  
5 prevention of chemotherapy induced premature ovarian failure in  
6  
7 premenopausal women. Cochrane Database of Systematic Reviews 2011; (11).  
8  
9 <http://onlinelibrary.wiley.com/doi/10.1002/14651858.CD008018.pub2/abstract>  
10  
11  
12  
13 t.
- 14  
15 52. Chen X, Deng L, Jiang X, et al. Chinese herbal medicine for oesophageal cancer.  
16  
17 Cochrane Database of Systematic Reviews 2016; (1).  
18  
19 <http://onlinelibrary.wiley.com/doi/10.1002/14651858.CD004520.pub7/abstract>  
20  
21  
22  
23 t.
- 24  
25 53. Cheuk Daniel KL, Chiang Alan KS, Chan Godfrey CF, et al. Urate oxidase for the  
26  
27 prevention and treatment of tumour lysis syndrome in children with cancer.  
28  
29 Cochrane Database of Systematic Reviews 2014; (3).  
30  
31 <http://onlinelibrary.wiley.com/doi/10.1002/14651858.CD006945.pub4/abstract>  
32  
33  
34  
35 t.
- 36  
37 54. Cheuk Daniel KL, Chiang Alan KS, Lee Tsz L, et al. Vaccines for prophylaxis of viral  
38  
39 infections in patients with hematological malignancies. Cochrane Database of  
40  
41 Systematic Reviews 2011; (3).  
42  
43 <http://onlinelibrary.wiley.com/doi/10.1002/14651858.CD006505.pub2/abstract>  
44  
45  
46  
47 t.
- 48  
49 55. Cirocchi R, Trastulli S, Abraha I, et al. Non-resection versus resection for an  
50  
51 asymptomatic primary tumour in patients with unresectable Stage IV colorectal  
52  
53 cancer. Cochrane Database of Systematic Reviews 2012; (8).  
54  
55 <http://onlinelibrary.wiley.com/doi/10.1002/14651858.CD008997.pub2/abstract>  
56  
57  
58  
59  
60 t.

- 1  
2  
3 56. Cirocchi R, Trastulli S, Boselli C, et al. Radiofrequency ablation in the treatment of  
4  
5 liver metastases from colorectal cancer. Cochrane Database of Systematic  
6  
7 Reviews 2012; (6).  
8  
9  
10 <http://onlinelibrary.wiley.com/doi/10.1002/14651858.CD006317.pub3/abstract>  
11  
12  
13  
14  
15 57. Clarke T, Galaal K, Bryant A, et al. Evaluation of follow-up strategies for patients with  
16  
17 epithelial ovarian cancer following completion of primary treatment. Cochrane  
18  
19 Database of Systematic Reviews 2014; (9).  
20  
21  
22 <http://onlinelibrary.wiley.com/doi/10.1002/14651858.CD006119.pub3/abstract>  
23  
24  
25  
26  
27 58. Cortés-Jofré M, Rueda J-R, Corsini-Muñoz G, et al. Drugs for preventing lung cancer in  
28  
29 healthy people. Cochrane Database of Systematic Reviews 2012; (10).  
30  
31  
32 <http://onlinelibrary.wiley.com/doi/10.1002/14651858.CD002141.pub2/abstract>  
33  
34  
35  
36  
37 59. Cousins Sarah E, Tempest E, Feuer David J. Surgery for the resolution of symptoms in  
38  
39 malignant bowel obstruction in advanced gynaecological and gastrointestinal  
40  
41 cancer. Cochrane Database of Systematic Reviews 2016; (1).  
42  
43  
44 <http://onlinelibrary.wiley.com/doi/10.1002/14651858.CD002764.pub2/abstract>  
45  
46  
47  
48  
49 60. Coyne I, O'Mathúna Dónal P, Gibson F, et al. Interventions for promoting  
50  
51 participation in shared decision-making for children with cancer. Cochrane  
52  
53 Database of Systematic Reviews 2016; (11).  
54  
55  
56 <http://onlinelibrary.wiley.com/doi/10.1002/14651858.CD008970.pub3/abstract>  
57  
58  
59  
60

- 1  
2  
3 61. Cramp F, Byron-Daniel J. Exercise for the management of cancer-related fatigue in  
4  
5 adults. Cochrane Database of Systematic Reviews 2012; (11).  
6  
7 <http://onlinelibrary.wiley.com/doi/10.1002/14651858.CD006145.pub3/abstract>  
8  
9  
10  
11  
12 62. Crighton Gemma L, Estcourt Lise J, Wood Erica M, et al. A therapeutic-only versus  
13  
14 prophylactic platelet transfusion strategy for preventing bleeding in patients  
15  
16 with haematological disorders after myelosuppressive chemotherapy or stem cell  
17  
18 transplantation. Cochrane Database of Systematic Reviews 2015; (9).  
19  
20 <http://onlinelibrary.wiley.com/doi/10.1002/14651858.CD010981.pub2/abstract>  
21  
22  
23  
24  
25  
26 63. Daly T, Hickey Brigid E, Lehman M, et al. Adjuvant radiotherapy following radical  
27  
28 prostatectomy for prostate cancer. Cochrane Database of Systematic Reviews  
29  
30 2011; (12).  
31  
32 <http://onlinelibrary.wiley.com/doi/10.1002/14651858.CD007234.pub2/abstract>  
33  
34  
35  
36  
37  
38 64. Day J, Yust-Katz S, Cachia D, et al. Interventions for the management of fatigue in  
39  
40 adults with a primary brain tumour. Cochrane Database of Systematic Reviews  
41  
42 2016; (4).  
43  
44 <http://onlinelibrary.wiley.com/doi/10.1002/14651858.CD011376.pub2/abstract>  
45  
46  
47  
48  
49  
50 65. Day J, Zienius K, Gehring K, et al. Interventions for preventing and ameliorating  
51  
52 cognitive deficits in adults treated with cranial irradiation. Cochrane Database of  
53  
54 Systematic Reviews 2014; (12).  
55  
56 <http://onlinelibrary.wiley.com/doi/10.1002/14651858.CD011335.pub2/abstract>  
57  
58  
59  
60

- 1  
2  
3 66. de Boer Angela GEM, Taskila Tyna K, Tamminga Sietske J, et al. Interventions to  
4 enhance return-to-work for cancer patients. Cochrane Database of Systematic  
5  
6  
7  
8  
9  
10 <http://onlinelibrary.wiley.com/doi/10.1002/14651858.CD007569.pub3/abstract>  
11  
12  
13  
14
- 15 67. De Caluwé L, Van Nieuwenhove Y, Ceelen Wim P. Preoperative chemoradiation  
16  
17 versus radiation alone for stage II and III resectable rectal cancer. Cochrane  
18  
19 Database of Systematic Reviews 2013; (2).  
20  
21 <http://onlinelibrary.wiley.com/doi/10.1002/14651858.CD006041.pub3/abstract>  
22  
23  
24  
25
- 26 68. de Castria Tiago B, da Silva Edina MK, Gois Aecio FT, et al. Cisplatin versus  
27  
28 carboplatin in combination with third-generation drugs for advanced non-small  
29  
30 cell lung cancer. Cochrane Database of Systematic Reviews 2013; (8).  
31  
32 <http://onlinelibrary.wiley.com/doi/10.1002/14651858.CD009256.pub2/abstract>  
33  
34  
35  
36
- 37 69. de Zwart V, Gouw Samantha C, Meyer-Wentrup Friederike AG. Antibody therapies  
38  
39 for lymphoma in children. Cochrane Database of Systematic Reviews 2016; (1).  
40  
41 <http://onlinelibrary.wiley.com/doi/10.1002/14651858.CD011181.pub2/abstract>  
42  
43  
44  
45
- 46 70. Dear Rachel F, McGeechan K, Jenkins Marisa C, et al. Combination versus sequential  
47  
48 single agent chemotherapy for metastatic breast cancer. Cochrane Database of  
49  
50 Systematic Reviews 2013; (12).  
51  
52 <http://onlinelibrary.wiley.com/doi/10.1002/14651858.CD008792.pub2/abstract>  
53  
54  
55  
56  
57  
58  
59  
60

- 1  
2  
3 71. Deng L, Zhang J, Wu T, et al. Combination chemotherapy for primary treatment of  
4  
5 high-risk gestational trophoblastic tumour. Cochrane Database of Systematic  
6  
7 Reviews 2013; (1).  
8  
9  
10 <http://onlinelibrary.wiley.com/doi/10.1002/14651858.CD005196.pub4/abstract>  
11  
12  
13 t.
- 14  
15 72. Deva S, Jameson M. Histamine type 2 receptor antagonists as adjuvant treatment for  
16  
17 resected colorectal cancer. Cochrane Database of Systematic Reviews 2012; (8).  
18  
19 <http://onlinelibrary.wiley.com/doi/10.1002/14651858.CD007814.pub2/abstract>  
20  
21  
22 t.
- 23  
24 73. Diaz-Nieto R, Orti-Rodríguez R, Winslet M. Post-surgical chemotherapy versus  
25  
26 surgery alone for resectable gastric cancer. Cochrane Database of Systematic  
27  
28 Reviews 2013; (9).  
29  
30  
31 <http://onlinelibrary.wiley.com/doi/10.1002/14651858.CD008415.pub2/abstract>  
32  
33  
34 t.
- 35  
36 74. Dominick S, Hickey M, Chin J, et al. Levonorgestrel intrauterine system for  
37  
38 endometrial protection in women with breast cancer on adjuvant tamoxifen.  
39  
40 Cochrane Database of Systematic Reviews 2015; (12).  
41  
42  
43 <http://onlinelibrary.wiley.com/doi/10.1002/14651858.CD007245.pub3/abstract>  
44  
45  
46 t.
- 47  
48 75. Dong Z, Xu J, Wang Z, et al. Stents for the prevention of pancreatic fistula following  
49  
50 pancreaticoduodenectomy. Cochrane Database of Systematic Reviews 2016; (5).  
51  
52  
53 <http://onlinelibrary.wiley.com/doi/10.1002/14651858.CD008914.pub3/abstract>  
54  
55  
56 t.
- 57  
58 76. D'Souza N, Darmanin G, Fedorowicz Z. Immediate versus delayed reconstruction  
59  
60 following surgery for breast cancer. Cochrane Database of Systematic Reviews

2011; (7).

<http://onlinelibrary.wiley.com/doi/10.1002/14651858.CD008674.pub2/abstract>.

77. Edey Katharine A, Allan E, Murdoch John B, et al. Interventions for the treatment of Paget's disease of the vulva. Cochrane Database of Systematic Reviews 2013; (10).

<http://onlinelibrary.wiley.com/doi/10.1002/14651858.CD009245.pub2/abstract>.

78. Elattar A, Bryant A, Winter-Roach Brett A, et al. Optimal primary surgical treatment for advanced epithelial ovarian cancer. Cochrane Database of Systematic Reviews 2011; (8).

<http://onlinelibrary.wiley.com/doi/10.1002/14651858.CD007565.pub2/abstract>.

79. Eleje George U, Eke Ahizechukwu C, Igberase Gabriel O, et al. Palliative interventions for controlling vaginal bleeding in advanced cervical cancer. Cochrane Database of Systematic Reviews 2015; (5).

<http://onlinelibrary.wiley.com/doi/10.1002/14651858.CD011000.pub2/abstract>.

80. Eliakim-Raz N, Vinograd I, Zalmanovici Trestioreanu A, et al. Influenza vaccines in immunosuppressed adults with cancer. Cochrane Database of Systematic Reviews 2013; (10).

<http://onlinelibrary.wiley.com/doi/10.1002/14651858.CD008983.pub2/abstract>.

81. Elias S, Al-Khayatt A, Porter Richard WJ, et al. Dental extractions prior to radiotherapy to the jaws for reducing post-radiotherapy dental complications.

1  
2  
3 Cochrane Database of Systematic Reviews 2013; (2).

4 <http://onlinelibrary.wiley.com/doi/10.1002/14651858.CD008857.pub2/abstract>  
5  
6  
7  
8 t.

9  
10 82. Estcourt L, Stanworth S, Doree C, et al. Prophylactic platelet transfusion for  
11 prevention of bleeding in patients with haematological disorders after  
12 chemotherapy and stem cell transplantation. Cochrane Database of Systematic  
13 Reviews 2012; (5).

14  
15  
16  
17  
18 <http://onlinelibrary.wiley.com/doi/10.1002/14651858.CD004269.pub3/abstract>  
19  
20  
21  
22 t.

23  
24 83. Estcourt Lise J, Stanworth S, Doree C, et al. Different doses of prophylactic platelet  
25 transfusion for preventing bleeding in people with haematological disorders after  
26 myelosuppressive chemotherapy or stem cell transplantation. Cochrane Database  
27 of Systematic Reviews 2015; (10).

28  
29  
30  
31  
32 <http://onlinelibrary.wiley.com/doi/10.1002/14651858.CD010984.pub2/abstract>  
33  
34  
35  
36 t.

37  
38 84. Estcourt Lise J, Stanworth Simon J, Doree C, et al. Granulocyte transfusions for  
39 preventing infections in people with neutropenia or neutrophil dysfunction.  
40  
41  
42  
43  
44  
45  
46  
47  
48  
49  
50  
51  
52  
53  
54  
55  
56  
57  
58  
59  
60  
Cochrane Database of Systematic Reviews 2015; (6).

<http://onlinelibrary.wiley.com/doi/10.1002/14651858.CD005341.pub3/abstract>  
t.

85. Everett T, Bryant A, Griffin Michelle F, et al. Interventions targeted at women to  
encourage the uptake of cervical screening. Cochrane Database of Systematic  
Reviews 2011; (5).

<http://onlinelibrary.wiley.com/doi/10.1002/14651858.CD002834.pub2/abstract>  
t.



- 1  
2  
3 86. Ezzo J, Manheimer E, McNeely Margaret L, et al. Manual lymphatic drainage for  
4  
5 lymphedema following breast cancer treatment. Cochrane Database of Systematic  
6  
7 Reviews 2015; (5).  
8  
9  
10 [http://onlinelibrary.wiley.com/doi/10.1002/14651858.CD003475.pub2/abstrac](http://onlinelibrary.wiley.com/doi/10.1002/14651858.CD003475.pub2/abstract)  
11  
12 [t.](http://onlinelibrary.wiley.com/doi/10.1002/14651858.CD003475.pub2/abstract)  
13  
14  
15 87. Farquhar C, Marjoribanks J, Lethaby A, et al. High-dose chemotherapy and  
16  
17 autologous bone marrow or stem cell transplantation versus conventional  
18  
19 chemotherapy for women with early poor prognosis breast cancer. Cochrane  
20  
21 Database of Systematic Reviews 2016; (5).  
22  
23  
24 [http://onlinelibrary.wiley.com/doi/10.1002/14651858.CD003139.pub3/abstrac](http://onlinelibrary.wiley.com/doi/10.1002/14651858.CD003139.pub3/abstract)  
25  
26 [t.](http://onlinelibrary.wiley.com/doi/10.1002/14651858.CD003139.pub3/abstract)  
27  
28  
29 88. Felbel S, Meerpohl Joerg J, Monsef I, et al. Yoga in addition to standard care for  
30  
31 patients with haematological malignancies. Cochrane Database of Systematic  
32  
33 Reviews 2014; (6).  
34  
35  
36 [http://onlinelibrary.wiley.com/doi/10.1002/14651858.CD010146.pub2/abstrac](http://onlinelibrary.wiley.com/doi/10.1002/14651858.CD010146.pub2/abstract)  
37  
38 [t.](http://onlinelibrary.wiley.com/doi/10.1002/14651858.CD010146.pub2/abstract)  
39  
40  
41 89. Ford Alexander C, Forman D, Hunt R, et al. Helicobacter pylori eradication for the  
42  
43 prevention of gastric neoplasia. Cochrane Database of Systematic Reviews 2015;  
44  
45 (7).  
46  
47  
48 [http://onlinelibrary.wiley.com/doi/10.1002/14651858.CD005583.pub2/abstrac](http://onlinelibrary.wiley.com/doi/10.1002/14651858.CD005583.pub2/abstract)  
49  
50 [t.](http://onlinelibrary.wiley.com/doi/10.1002/14651858.CD005583.pub2/abstract)  
51  
52  
53 90. Frost Jonathan A, Webster Katie E, Bryant A, et al. Lymphadenectomy for the  
54  
55 management of endometrial cancer. Cochrane Database of Systematic Reviews  
56  
57 2015; (9).  
58  
59  
60

1  
2  
3 <http://onlinelibrary.wiley.com/doi/10.1002/14651858.CD007585.pub3/abstract>  
4  
5  
6 t.

7  
8 91. Fu J, Fang F, Xie L, et al. Prophylactic chemotherapy for hydatidiform mole to prevent  
9  
10 gestational trophoblastic neoplasia. Cochrane Database of Systematic Reviews  
11  
12 2012; (10).

13  
14 <http://onlinelibrary.wiley.com/doi/10.1002/14651858.CD007289.pub2/abstract>  
15  
16  
17 t.

18  
19 92. Furness S, Glenny A-M, Worthington Helen V, et al. Interventions for the treatment of  
20  
21 oral cavity and oropharyngeal cancer: chemotherapy. Cochrane Database of  
22  
23 Systematic Reviews 2011; (4).

24  
25 <http://onlinelibrary.wiley.com/doi/10.1002/14651858.CD006386.pub3/abstract>  
26  
27  
28 t.

29  
30 93. Gafter-Gvili A, Fraser A, Paul M, et al. Antibiotic prophylaxis for bacterial infections in  
31  
32 afebrile neutropenic patients following chemotherapy. Cochrane Database of  
33  
34 Systematic Reviews 2012; (1).

35  
36 <http://onlinelibrary.wiley.com/doi/10.1002/14651858.CD004386.pub3/abstract>  
37  
38  
39 t.

40  
41 94. Gaitskell K, Martinek I, Bryant A, et al. Angiogenesis inhibitors for the treatment of  
42  
43 ovarian cancer. Cochrane Database of Systematic Reviews 2011; (9).

44  
45 <http://onlinelibrary.wiley.com/doi/10.1002/14651858.CD007930.pub2/abstract>  
46  
47  
48 t.

49  
50 95. Galaal K, Al Moundhri M, Bryant A, et al. Adjuvant chemotherapy for advanced  
51  
52 endometrial cancer. Cochrane Database of Systematic Reviews 2014; (5).

53  
54 <http://onlinelibrary.wiley.com/doi/10.1002/14651858.CD010681.pub2/abstract>  
55  
56  
57 t.

- 1  
2  
3 96. Galaal K, Bryant A, Deane Katherine HO, et al. Interventions for reducing anxiety in  
4  
5 women undergoing colposcopy. Cochrane Database of Systematic Reviews 2011;  
6  
7 (12).  
8  
9  
10 <http://onlinelibrary.wiley.com/doi/10.1002/14651858.CD006013.pub3/abstract>  
11  
12  
13  
14  
15 97. Galaal K, Bryant A, Fisher Ann D, et al. Laparoscopy versus laparotomy for the  
16  
17 management of early stage endometrial cancer. Cochrane Database of Systematic  
18  
19 Reviews 2012; (9).  
20  
21 <http://onlinelibrary.wiley.com/doi/10.1002/14651858.CD006655.pub2/abstract>  
22  
23  
24  
25  
26 98. Galaal K, van der Heijden E, Godfrey K, et al. Adjuvant radiotherapy and/or  
27  
28 chemotherapy after surgery for uterine carcinosarcoma. Cochrane Database of  
29  
30 Systematic Reviews 2013; (2).  
31  
32 <http://onlinelibrary.wiley.com/doi/10.1002/14651858.CD006812.pub3/abstract>  
33  
34  
35  
36  
37 99. Galway K, Black A, Cantwell M, et al. Psychosocial interventions to improve quality of  
38  
39 life and emotional wellbeing for recently diagnosed cancer patients. Cochrane  
40  
41 Database of Systematic Reviews 2012; (11).  
42  
43 <http://onlinelibrary.wiley.com/doi/10.1002/14651858.CD007064.pub2/abstract>  
44  
45  
46  
47  
48 100. Gartlehner G, Thaler K, Chapman A, et al. Mammography in combination with  
49  
50 breast ultrasonography versus mammography for breast cancer screening in  
51  
52 women at average risk. Cochrane Database of Systematic Reviews 2013; (4).  
53  
54 <http://onlinelibrary.wiley.com/doi/10.1002/14651858.CD009632.pub2/abstract>  
55  
56  
57  
58  
59  
60

- 1  
2  
3 101. Gbabe Oluwatoyin F, Okwundu Charles I, Dedicoat M, et al. Treatment of severe or  
4  
5 progressive Kaposi's sarcoma in HIV-infected adults. Cochrane Database of  
6  
7 Systematic Reviews 2014; (9).  
8  
9  
10 <http://onlinelibrary.wiley.com/doi/10.1002/14651858.CD003256.pub2/abstract>  
11  
12  
13  
14  
15 102. George R, Jeba J, Ramkumar G, et al. Interventions for the treatment of metastatic  
16  
17 extradural spinal cord compression in adults. Cochrane Database of Systematic  
18  
19 Reviews 2015; (9).  
20  
21  
22 <http://onlinelibrary.wiley.com/doi/10.1002/14651858.CD006716.pub3/abstract>  
23  
24  
25  
26  
27 103. Gherzi D, Willson Melina L, Chan Matthew Ming K, et al. Taxane-containing  
28  
29 regimens for metastatic breast cancer. Cochrane Database of Systematic Reviews  
30  
31 2015; (6).  
32  
33  
34 <http://onlinelibrary.wiley.com/doi/10.1002/14651858.CD003366.pub3/abstract>  
35  
36  
37  
38  
39 104. Goodwin A, Parker S, Gherzi D, et al. Post-operative radiotherapy for ductal  
40  
41 carcinoma in situ of the breast. Cochrane Database of Systematic Reviews 2013;  
42  
43 (11).  
44  
45  
46 <http://onlinelibrary.wiley.com/doi/10.1002/14651858.CD000563.pub7/abstract>  
47  
48  
49  
50  
51 105. Goossen Ginette M, Kremer Leontien CM, van de Wetering Marianne D. Influenza  
52  
53 vaccination in children being treated with chemotherapy for cancer. Cochrane  
54  
55 Database of Systematic Reviews 2013; (8).  
56  
57  
58 <http://onlinelibrary.wiley.com/doi/10.1002/14651858.CD006484.pub3/abstract>  
59  
60

- 1  
2  
3 106. Gordijn Maartje S, Rensen N, Gemke Reinoud JBJ, et al. Hypothalamic-pituitary-  
4  
5 adrenal (HPA) axis suppression after treatment with glucocorticoid therapy for  
6  
7 childhood acute lymphoblastic leukaemia. Cochrane Database of Systematic  
8  
9 Reviews 2015; (8).  
10  
11 <http://onlinelibrary.wiley.com/doi/10.1002/14651858.CD008727.pub3/abstract>  
12  
13  
14  
15  
16  
17 107. Gøtzsche Peter C, Johansen Helle K. Routine versus selective antifungal  
18  
19 administration for control of fungal infections in patients with cancer. Cochrane  
20  
21 Database of Systematic Reviews 2014; (9).  
22  
23 <http://onlinelibrary.wiley.com/doi/10.1002/14651858.CD000026.pub2/abstract>  
24  
25  
26  
27  
28  
29 108. Gøtzsche Peter C, Jørgensen Karsten J. Screening for breast cancer with  
30  
31 mammography. Cochrane Database of Systematic Reviews 2013; (6).  
32  
33 <http://onlinelibrary.wiley.com/doi/10.1002/14651858.CD001877.pub5/abstract>  
34  
35  
36  
37  
38  
39 109. Grabosch Shannon M, Shariff Osman M, Wulff Judith L, et al. Non-steroidal anti-  
40  
41 inflammatory agents to induce regression and prevent the progression of cervical  
42  
43 intraepithelial neoplasia. Cochrane Database of Systematic Reviews 2014; (4).  
44  
45 <http://onlinelibrary.wiley.com/doi/10.1002/14651858.CD004121.pub3/abstract>  
46  
47  
48  
49  
50 110. Grande Antonio J, Silva V, Riera R, et al. Exercise for cancer cachexia in adults.  
51  
52 Cochrane Database of Systematic Reviews 2014; (11).  
53  
54 <http://onlinelibrary.wiley.com/doi/10.1002/14651858.CD010804.pub2/abstract>  
55  
56  
57  
58  
59  
60

- 1  
2  
3 111. Gupta Aditya K, Paquet M, Villanueva E, et al. Interventions for actinic keratoses.  
4  
5 Cochrane Database of Systematic Reviews 2012; (12).  
6  
7 <http://onlinelibrary.wiley.com/doi/10.1002/14651858.CD004415.pub2/abstract>  
8  
9  
10  
11  
12 112. Gurion R, Belnik-Plitman Y, Gafer-Gvili A, et al. Colony-stimulating factors for  
13  
14 prevention and treatment of infectious complications in patients with acute  
15  
16 myelogenous leukemia. Cochrane Database of Systematic Reviews 2012; (6).  
17  
18 <http://onlinelibrary.wiley.com/doi/10.1002/14651858.CD008238.pub3/abstract>  
19  
20  
21  
22  
23  
24 113. Gurumurthy M, Bryant A, Shanbhag S. Effectiveness of different treatment  
25  
26 modalities for the management of adult-onset granulosa cell tumours of the  
27  
28 ovary (primary and recurrent). Cochrane Database of Systematic Reviews 2014;  
29  
30 (4).  
31  
32 <http://onlinelibrary.wiley.com/doi/10.1002/14651858.CD006912.pub2/abstract>  
33  
34  
35  
36  
37  
38 114. Gurusamy Kurinchi S, Kumar S, Davidson Brian R. Prophylactic gastrojejunostomy  
39  
40 for unresectable periampullary carcinoma. Cochrane Database of Systematic  
41  
42 Reviews 2013; (2).  
43  
44 <http://onlinelibrary.wiley.com/doi/10.1002/14651858.CD008533.pub3/abstract>  
45  
46  
47  
48  
49  
50 115. Gurusamy Kurinchi S, Kumar S, Davidson Brian R, et al. Resection versus other  
51  
52 treatments for locally advanced pancreatic cancer. Cochrane Database of  
53  
54 Systematic Reviews 2014; (2).  
55  
56 <http://onlinelibrary.wiley.com/doi/10.1002/14651858.CD010244.pub2/abstract>  
57  
58  
59  
60

- 1  
2  
3 116. Gurusamy Kurinchi S, Pallari E, Midya S, et al. Laparoscopic versus open transhiatal  
4 oesophagectomy for oesophageal cancer. Cochrane Database of Systematic  
5  
6 oesophagectomy for oesophageal cancer. Cochrane Database of Systematic  
7  
8 Reviews 2016; (3).  
9  
10 <http://onlinelibrary.wiley.com/doi/10.1002/14651858.CD011390.pub2/abstract>  
11  
12  
13 t.
- 14  
15 117. Hadley G, Derry S, Moore RA, et al. Transdermal fentanyl for cancer pain. Cochrane  
16  
17 Database of Systematic Reviews 2013; (10).  
18  
19 <http://onlinelibrary.wiley.com/doi/10.1002/14651858.CD010270.pub2/abstract>  
20  
21  
22 t.
- 23  
24 118. Haldar K, Gaitskell K, Bryant A, et al. Epidermal growth factor receptor blockers for  
25  
26 the treatment of ovarian cancer. Cochrane Database of Systematic Reviews 2011;  
27  
28 (10).  
29  
30 <http://onlinelibrary.wiley.com/doi/10.1002/14651858.CD007927.pub3/abstract>  
31  
32  
33 t.
- 34  
35 119. Hart Michael G, Garside R, Rogers G, et al. Chemotherapy wafers for high grade  
36  
37 glioma. Cochrane Database of Systematic Reviews 2011; (3).  
38  
39 <http://onlinelibrary.wiley.com/doi/10.1002/14651858.CD007294.pub2/abstract>  
40  
41  
42 t.
- 43  
44 120. Hart Michael G, Garside R, Rogers G, et al. Temozolomide for high grade glioma.  
45  
46 Cochrane Database of Systematic Reviews 2013; (4).  
47  
48 <http://onlinelibrary.wiley.com/doi/10.1002/14651858.CD007415.pub2/abstract>  
49  
50  
51 t.
- 52  
53  
54 121. Hartmann T, Hübel K, Monsef I, et al. Additional plerixafor to granulocyte colony-  
55  
56 stimulating factors for haematopoietic stem cell mobilisation for autologous  
57  
58 transplantation in people with malignant lymphoma or multiple myeloma.  
59  
60

1  
2  
3 Cochrane Database of Systematic Reviews 2015; (10).

4 <http://onlinelibrary.wiley.com/doi/10.1002/14651858.CD010615.pub2/abstract>  
5  
6  
7  
8 t.

9  
10 122. Helm CW, Lorenz Douglas J, Meyer Nicholas J, et al. Retinoids for preventing the  
11 progression of cervical intra-epithelial neoplasia. Cochrane Database of  
12 Systematic Reviews 2013; (6).

13  
14  
15  
16 <http://onlinelibrary.wiley.com/doi/10.1002/14651858.CD003296.pub3/abstract>  
17  
18  
19 t.

20  
21 123. Henschke N, Maher Christopher G, Ostelo Raymond WJG, et al. Red flags to screen  
22 for malignancy in patients with low-back pain. Cochrane Database of Systematic  
23 Reviews 2013; (2).

24  
25  
26  
27 <http://onlinelibrary.wiley.com/doi/10.1002/14651858.CD008686.pub2/abstract>  
28  
29  
30 t.

31  
32 124. Henson Caroline C, Burden S, Davidson Susan E, et al. Nutritional interventions for  
33 reducing gastrointestinal toxicity in adults undergoing radical pelvic  
34 radiotherapy. Cochrane Database of Systematic Reviews 2013; (11).

35  
36  
37  
38 <http://onlinelibrary.wiley.com/doi/10.1002/14651858.CD009896.pub2/abstract>  
39  
40  
41 t.

42  
43 125. Herbst C, Monsef I, Specht L, et al. Chemotherapy alone versus chemotherapy plus  
44 radiotherapy for adults with early stage Hodgkin lymphoma. Cochrane Database  
45 of Systematic Reviews 2011; (4).

46  
47  
48  
49 <http://onlinelibrary.wiley.com/doi/10.1002/14651858.CD007110.pub3/abstract>  
50  
51  
52 t.

53  
54 126. Hickey Brigid E, Francis Daniel P, Lehman M. Sequencing of chemotherapy and  
55 radiotherapy for early breast cancer. Cochrane Database of Systematic Reviews  
56  
57  
58  
59  
60



1  
2  
3 2013; (4).

4  
5 <http://onlinelibrary.wiley.com/doi/10.1002/14651858.CD005212.pub3/abstract>  
6  
7  
8 t.

9  
10 127. Hilgart Jennifer S, Coles B, Iredale R. Cancer genetic risk assessment for individuals  
11  
12 at risk of familial breast cancer. Cochrane Database of Systematic Reviews 2012;  
13  
14 (2).

15  
16 <http://onlinelibrary.wiley.com/doi/10.1002/14651858.CD003721.pub3/abstract>  
17  
18  
19 t.

20  
21 128. Holme Ø, Bretthauer M, Fretheim A, et al. Flexible sigmoidoscopy versus faecal  
22  
23 occult blood testing for colorectal cancer screening in asymptomatic individuals.  
24  
25 Cochrane Database of Systematic Reviews 2013; (9).

26  
27 <http://onlinelibrary.wiley.com/doi/10.1002/14651858.CD009259.pub2/abstract>  
28  
29  
30 t.

31  
32 129. Holtick U, Albrecht M, Chemnitz Jens M, et al. Bone marrow versus peripheral blood  
33  
34 allogeneic haematopoietic stem cell transplantation for haematological  
35  
36 malignancies in adults. Cochrane Database of Systematic Reviews 2014; (4).

37  
38 <http://onlinelibrary.wiley.com/doi/10.1002/14651858.CD010189.pub2/abstract>  
39  
40  
41 t.

42  
43 130. Hurlow A, Bennett Michael I, Robb Karen A, et al. Transcutaneous electric nerve  
44  
45 stimulation (TENS) for cancer pain in adults. Cochrane Database of Systematic  
46  
47 Reviews 2012; (3).

48  
49 <http://onlinelibrary.wiley.com/doi/10.1002/14651858.CD006276.pub3/abstract>  
50  
51  
52 t.

53  
54 131. Hüttner Felix J, Fitzmaurice C, Schwarzer G, et al. Pylorus-preserving  
55  
56 pancreaticoduodenectomy (pp Whipple) versus pancreaticoduodenectomy  
57  
58  
59  
60

(classic Whipple) for surgical treatment of periampullary and pancreatic carcinoma. Cochrane Database of Systematic Reviews 2016; (2).

<http://onlinelibrary.wiley.com/doi/10.1002/14651858.CD006053.pub6/abstract>.

132. Hutzschenreuter F, Monsef I, Kreuzer K-A, et al. Granulocyte and granulocyte-macrophage colony stimulating factors for newly diagnosed patients with myelodysplastic syndromes. Cochrane Database of Systematic Reviews 2016; (2).  
<http://onlinelibrary.wiley.com/doi/10.1002/14651858.CD009310.pub2/abstract>.

133. Ilic D, Forbes Kristian M, Hased C. Lycopene for the prevention of prostate cancer. Cochrane Database of Systematic Reviews 2011; (11).  
<http://onlinelibrary.wiley.com/doi/10.1002/14651858.CD008007.pub2/abstract>.

134. Ilic D, Misso Marie L. Screening for testicular cancer. Cochrane Database of Systematic Reviews 2011; (2).  
<http://onlinelibrary.wiley.com/doi/10.1002/14651858.CD007853.pub2/abstract>.

135. Ilic D, Neuberger Molly M, Djulbegovic M, et al. Screening for prostate cancer. Cochrane Database of Systematic Reviews 2013; (1).  
<http://onlinelibrary.wiley.com/doi/10.1002/14651858.CD004720.pub3/abstract>.

136. Itchaki G, Gafter-Gvili A, Lahav M, et al. Anthracycline-containing regimens for treatment of follicular lymphoma in adults. Cochrane Database of Systematic Reviews 2013; (7).

1  
2  
3 <http://onlinelibrary.wiley.com/doi/10.1002/14651858.CD008909.pub2/abstract>  
4  
5  
6 t.

7  
8 137. Jaaback K, Johnson N, Lawrie Theresa A. Intraperitoneal chemotherapy for the  
9  
10 initial management of primary epithelial ovarian cancer. Cochrane Database of  
11  
12 Systematic Reviews 2016; (1).

13  
14  
15 <http://onlinelibrary.wiley.com/doi/10.1002/14651858.CD005340.pub4/abstract>  
16  
17  
18 t.

19  
20 138. Jassim Ghufuran A, Whitford David L, Hickey A, et al. Psychological interventions for  
21  
22 women with non-metastatic breast cancer. Cochrane Database of Systematic  
23  
24 Reviews 2015; (5).

25  
26  
27 <http://onlinelibrary.wiley.com/doi/10.1002/14651858.CD008729.pub2/abstract>  
28  
29  
30 t.

31  
32 139. Jin H, Leng Q, Li C. Dietary flavonoid for preventing colorectal neoplasms. Cochrane  
33  
34 Database of Systematic Reviews 2012; (8).

35  
36  
37 <http://onlinelibrary.wiley.com/doi/10.1002/14651858.CD009350.pub2/abstract>  
38  
39  
40 t.

41  
42 140. Jin X, Ruiz Beguerie J, Sze Daniel M-y, et al. Ganoderma lucidum (Reishi mushroom)  
43  
44 for cancer treatment. Cochrane Database of Systematic Reviews 2016; (4).

45  
46  
47 <http://onlinelibrary.wiley.com/doi/10.1002/14651858.CD007731.pub3/abstract>  
48  
49  
50 t.

51  
52 141. Johansen Helle K, Gøtzsche Peter C. Amphotericin B versus fluconazole for  
53  
54 controlling fungal infections in neutropenic cancer patients. Cochrane Database  
55  
56 of Systematic Reviews 2014; (9).

57  
58  
59 <http://onlinelibrary.wiley.com/doi/10.1002/14651858.CD000239.pub2/abstract>  
60  
61  
62 t.

- 1  
2  
3 142. Johansen Helle K, Gøtzsche Peter C. Amphotericin B lipid soluble formulations  
4  
5 versus amphotericin B in cancer patients with neutropenia. Cochrane Database of  
6  
7 Systematic Reviews 2014; (9).  
8  
9  
10 <http://onlinelibrary.wiley.com/doi/10.1002/14651858.CD000969.pub2/abstract>  
11  
12  
13 t.
- 14  
15 143. Johnson N, Bryant A, Miles T, et al. Adjuvant chemotherapy for endometrial cancer  
16  
17 after hysterectomy. Cochrane Database of Systematic Reviews 2011; (10).  
18  
19 <http://onlinelibrary.wiley.com/doi/10.1002/14651858.CD003175.pub2/abstract>  
20  
21  
22 t.
- 23  
24 144. Jones Daniel J, Bunn F, Bell-Syer Sophie V. Prophylactic antibiotics to prevent  
25  
26 surgical site infection after breast cancer surgery. Cochrane Database of  
27  
28 Systematic Reviews 2014; (3).  
29  
30 <http://onlinelibrary.wiley.com/doi/10.1002/14651858.CD005360.pub4/abstract>  
31  
32  
33 t.
- 34  
35 145. Jones G, Cleves A, Wilt Timothy J, et al. Intravesical gemcitabine for non-muscle  
36  
37 invasive bladder cancer. Cochrane Database of Systematic Reviews 2012; (1).  
38  
39 <http://onlinelibrary.wiley.com/doi/10.1002/14651858.CD009294.pub2/abstract>  
40  
41  
42  
43 t.
- 44  
45 146. Jørgensen Karsten J, Gøtzsche Peter C, Dalbøge Christina S, et al. Voriconazole  
46  
47 versus amphotericin B or fluconazole in cancer patients with neutropenia.  
48  
49 Cochrane Database of Systematic Reviews 2014; (2).  
50  
51 <http://onlinelibrary.wiley.com/doi/10.1002/14651858.CD004707.pub3/abstract>  
52  
53  
54  
55 t.
- 56  
57 147. Kaushik S, Pepas L, Nordin A, et al. Surgical interventions for high-grade vulval  
58  
59 intraepithelial neoplasia. Cochrane Database of Systematic Reviews 2014; (3).  
60

1  
2  
3 <http://onlinelibrary.wiley.com/doi/10.1002/14651858.CD007928.pub3/abstract>  
4  
5  
6 t.

7  
8 148. Kerrigan S, Grant R. Antiepileptic drugs for treating seizures in adults with brain  
9  
10 tumours. Cochrane Database of Systematic Reviews 2011; (8).

11  
12 <http://onlinelibrary.wiley.com/doi/10.1002/14651858.CD008586.pub2/abstract>  
13  
14  
15 t.

16  
17 149. Khan F, Amatya B, Ng L, et al. Multidisciplinary rehabilitation for follow-up of  
18  
19 women treated for breast cancer. Cochrane Database of Systematic Reviews  
20  
21 2012; (12).

22  
23 <http://onlinelibrary.wiley.com/doi/10.1002/14651858.CD009553.pub2/abstract>  
24  
25  
26 t.

27  
28 150. Khan F, Amatya B, Ng L, et al. Multidisciplinary rehabilitation after primary brain  
29  
30 tumour treatment. Cochrane Database of Systematic Reviews 2015; (8).

31  
32 <http://onlinelibrary.wiley.com/doi/10.1002/14651858.CD009509.pub3/abstract>  
33  
34  
35 t.

36  
37 151. Kharfan-Dabaja M, Mhaskar R, Reljic T, et al. Mycophenolate mofetil versus  
38  
39 methotrexate for prevention of graft-versus-host disease in people receiving  
40  
41 allogeneic hematopoietic stem cell transplantation. Cochrane Database of  
42  
43 Systematic Reviews 2014; (7).

44  
45 <http://onlinelibrary.wiley.com/doi/10.1002/14651858.CD010280.pub2/abstract>  
46  
47  
48 t.

49  
50 152. Khasraw M, Ameratunga Malaka S, Grant R, et al. Antiangiogenic therapy for high-  
51  
52 grade glioma. Cochrane Database of Systematic Reviews 2014; (9).

53  
54 <http://onlinelibrary.wiley.com/doi/10.1002/14651858.CD008218.pub3/abstract>  
55  
56  
57 t.

- 1  
2  
3 153. Kidane B, Coughlin S, Vogt K, et al. Preoperative chemotherapy for resectable  
4  
5 thoracic esophageal cancer. Cochrane Database of Systematic Reviews 2015; (5).  
6  
7 <http://onlinelibrary.wiley.com/doi/10.1002/14651858.CD001556.pub3/abstract>  
8  
9  
10  
11  
12  
13 154. Kietpeerakool C, Supoken A, Laopaiboon M, et al. Effectiveness of tranexamic acid in  
14  
15 reducing blood loss during cytoreductive surgery for advanced ovarian cancer.  
16  
17 Cochrane Database of Systematic Reviews 2016; (1).  
18  
19 <http://onlinelibrary.wiley.com/doi/10.1002/14651858.CD011732.pub2/abstract>  
20  
21  
22  
23  
24 155. Knijnenburg Sebastiaan L, Mulder Renée L, Schouten-Van Meeteren Antoinette YN,  
25  
26 et al. Early and late renal adverse effects after potentially nephrotoxic treatment  
27  
28 for childhood cancer. Cochrane Database of Systematic Reviews 2013; (10).  
29  
30 <http://onlinelibrary.wiley.com/doi/10.1002/14651858.CD008944.pub2/abstract>  
31  
32  
33  
34  
35  
36 156. Kokka F, Bryant A, Brockbank E, et al. Surgical treatment of stage IA2 cervical  
37  
38 cancer. Cochrane Database of Systematic Reviews 2014; (5).  
39  
40 <http://onlinelibrary.wiley.com/doi/10.1002/14651858.CD010870.pub2/abstract>  
41  
42  
43  
44  
45  
46 157. Kokka F, Bryant A, Brockbank E, et al. Hysterectomy with radiotherapy or  
47  
48 chemotherapy or both for women with locally advanced cervical cancer.  
49  
50 Cochrane Database of Systematic Reviews 2015; (4).  
51  
52 <http://onlinelibrary.wiley.com/doi/10.1002/14651858.CD010260.pub2/abstract>  
53  
54  
55  
56  
57 158. Kong A, Johnson N, Kitchener Henry C, et al. Adjuvant radiotherapy for stage I  
58  
59 endometrial cancer. Cochrane Database of Systematic Reviews 2012; (4).  
60

1  
2  
3 <http://onlinelibrary.wiley.com/doi/10.1002/14651858.CD003916.pub4/abstract>  
4  
5  
6 t.

7  
8 159. Kucukmetin A, Biliatis I, Naik R, et al. Laparoscopically assisted radical vaginal  
9  
10 hysterectomy versus radical abdominal hysterectomy for the treatment of early  
11  
12 cervical cancer. Cochrane Database of Systematic Reviews 2013; (10).

13  
14  
15 <http://onlinelibrary.wiley.com/doi/10.1002/14651858.CD006651.pub3/abstract>  
16  
17  
18 t.

19  
20 160. Kunath F, Grobe Henrik R, Rücker G, et al. Non-steroidal antiandrogen  
21  
22 monotherapy compared with luteinising hormone-releasing hormone agonists or  
23  
24 surgical castration monotherapy for advanced prostate cancer. Cochrane  
25  
26 Database of Systematic Reviews 2014; (6).

27  
28  
29 <http://onlinelibrary.wiley.com/doi/10.1002/14651858.CD009266.pub2/abstract>  
30  
31  
32 t.

33  
34 161. Kyrgidis A, Tzellos T, Mocellin S, et al. Sentinel lymph node biopsy followed by  
35  
36 lymph node dissection for localised primary cutaneous melanoma. Cochrane  
37  
38 Database of Systematic Reviews 2015; (5).

39  
40  
41 <http://onlinelibrary.wiley.com/doi/10.1002/14651858.CD010307.pub2/abstract>  
42  
43  
44 t.

45  
46 162. Kyrgiou M, Mitra A, Arbyn M, et al. Fertility and early pregnancy outcomes after  
47  
48 conservative treatment for cervical intraepithelial neoplasia. Cochrane Database  
49  
50 of Systematic Reviews 2015; (9).

51  
52  
53 <http://onlinelibrary.wiley.com/doi/10.1002/14651858.CD008478.pub2/abstract>  
54  
55  
56 t.

57  
58 163. Lanceley A, Fiander A, McCormack M, et al. Follow-up protocols for women with  
59  
60 cervical cancer after primary treatment. Cochrane Database of Systematic

1  
2  
3       Reviews 2013; (11).

4  
5       <http://onlinelibrary.wiley.com/doi/10.1002/14651858.CD008767.pub2/abstract>  
6  
7  
8       t.

9  
10      164. Lawal Aramide O, Musekiwa A, Grobler L. Interferon after surgery for women with  
11           advanced (Stage II-IV) epithelial ovarian cancer. Cochrane Database of Systematic  
12           Reviews 2013; (6).

13  
14  
15       <http://onlinelibrary.wiley.com/doi/10.1002/14651858.CD009620.pub2/abstract>  
16  
17  
18       t.

19  
20      165. Lawrie Theresa A, Bryant A, Cameron A, et al. Pegylated liposomal doxorubicin for  
21           relapsed epithelial ovarian cancer. Cochrane Database of Systematic Reviews  
22           2013; (7).

23  
24       <http://onlinelibrary.wiley.com/doi/10.1002/14651858.CD006910.pub2/abstract>  
25  
26  
27       t.

28  
29      166. Lawrie Theresa A, Nordin A, Chakrabarti M, et al. Medical and surgical  
30           interventions for the treatment of usual-type vulval intraepithelial neoplasia.  
31           Cochrane Database of Systematic Reviews 2016; (1).

32  
33       <http://onlinelibrary.wiley.com/doi/10.1002/14651858.CD011837.pub2/abstract>  
34  
35  
36       t.

37  
38      167. Lawrie Theresa A, Patel A, Martin-Hirsch Pierre PL, et al. Sentinel node assessment  
39           for diagnosis of groin lymph node involvement in vulval cancer. Cochrane  
40           Database of Systematic Reviews 2014; (6).

41  
42       <http://onlinelibrary.wiley.com/doi/10.1002/14651858.CD010409.pub2/abstract>  
43  
44  
45       t.

46  
47      168. Lawrie Theresa A, Rabbie R, Thoma C, et al. Pegylated liposomal doxorubicin for  
48           first-line treatment of epithelial ovarian cancer. Cochrane Database of Systematic  
49  
50



1  
2  
3       Reviews 2013; (10).

4  
5       <http://onlinelibrary.wiley.com/doi/10.1002/14651858.CD010482.pub2/abstract>  
6  
7  
8       t.

9  
10   169. Lawrie Theresa A, Winter-Roach Brett A, Heus P, et al. Adjuvant (post-surgery)  
11       chemotherapy for early stage epithelial ovarian cancer. Cochrane Database of  
12       Systematic Reviews 2015; (12).

13  
14  
15       <http://onlinelibrary.wiley.com/doi/10.1002/14651858.CD004706.pub5/abstract>  
16  
17  
18       t.

19  
20   170. Lecavalier-Barsoum M, Quon H, Abdulkarim B. Adjuvant treatment of anaplastic  
21       oligodendrogliomas and oligoastrocytomas. Cochrane Database of Systematic  
22       Reviews 2014; (5).

23  
24  
25       <http://onlinelibrary.wiley.com/doi/10.1002/14651858.CD007104.pub2/abstract>  
26  
27  
28       t.

29  
30   171. Lee Siew H, Grant R, Kennedy C, et al. Positioning and spinal bracing for pain relief  
31       in metastatic spinal cord compression in adults. Cochrane Database of Systematic  
32       Reviews 2015; (9).

33  
34  
35       <http://onlinelibrary.wiley.com/doi/10.1002/14651858.CD007609.pub3/abstract>  
36  
37  
38       t.

39  
40   172. Leffers N, Daemen T, Helfrich W, et al. Antigen-specific active immunotherapy for  
41       ovarian cancer. Cochrane Database of Systematic Reviews 2014; (9).

42  
43  
44       <http://onlinelibrary.wiley.com/doi/10.1002/14651858.CD007287.pub3/abstract>  
45  
46  
47       t.

48  
49   173. Li X, Xu S, Tan Y, et al. The effects of idarubicin versus other anthracyclines for  
50       induction therapy of patients with newly diagnosed leukaemia. Cochrane  
51       Database of Systematic Reviews 2015; (6).

1  
2  
3 <http://onlinelibrary.wiley.com/doi/10.1002/14651858.CD010432.pub2/abstract>  
4  
5  
6 t.

7  
8 174. Liu R, Wang X, Tian Jin H, et al. High dose rate versus low dose rate intracavity  
9  
10 brachytherapy for locally advanced uterine cervix cancer. Cochrane Database of  
11  
12 Systematic Reviews 2014; (10).

13  
14  
15 <http://onlinelibrary.wiley.com/doi/10.1002/14651858.CD007563.pub3/abstract>  
16  
17  
18 t.

19  
20 175. Loeffen Erik AH, te Poele Esther M, Tissing Wim JE, et al. Very early discharge  
21  
22 versus early discharge versus non-early discharge in children with cancer and  
23  
24 febrile neutropenia. Cochrane Database of Systematic Reviews 2016; (2).

25  
26  
27 <http://onlinelibrary.wiley.com/doi/10.1002/14651858.CD008382.pub2/abstract>  
28  
29  
30 t.

31  
32 176. Lu D, Wang X, Shi G. Perioperative enhanced recovery programmes for  
33  
34 gynaecological cancer patients. Cochrane Database of Systematic Reviews 2015;  
35  
36 (3).

37  
38  
39 <http://onlinelibrary.wiley.com/doi/10.1002/14651858.CD008239.pub4/abstract>  
40  
41  
42 t.

43  
44 177. Macaya A, Muñoz-Santos C, Balaguer A, et al. Interventions for anal canal  
45  
46 intraepithelial neoplasia. Cochrane Database of Systematic Reviews 2012; (12).

47  
48  
49 <http://onlinelibrary.wiley.com/doi/10.1002/14651858.CD009244.pub2/abstract>  
50  
51  
52 t.

53  
54 178. Macey R, Walsh T, Brocklehurst P, et al. Diagnostic tests for oral cancer and  
55  
56 potentially malignant disorders in patients presenting with clinically evident  
57  
58 lesions. Cochrane Database of Systematic Reviews 2015; (5).

1  
2  
3 <http://onlinelibrary.wiley.com/doi/10.1002/14651858.CD010276.pub2/abstract>  
4  
5  
6 t.

7  
8 179. Manser R, Lethaby A, Irving Louis B, et al. Screening for lung cancer. Cochrane  
9  
10 Database of Systematic Reviews 2013; (6).

11  
12 <http://onlinelibrary.wiley.com/doi/10.1002/14651858.CD001991.pub3/abstract>  
13  
14  
15 t.

16  
17 180. Mao C, Fu X-H, Yuan J-Q, et al. Interleukin-2 as maintenance therapy for children  
18  
19 and adults with acute myeloid leukaemia in first complete remission. Cochrane  
20  
21 Database of Systematic Reviews 2015; (11).

22  
23 <http://onlinelibrary.wiley.com/doi/10.1002/14651858.CD010248.pub2/abstract>  
24  
25  
26 t.

27  
28  
29 181. Mao C, Yang Z-Y, He B-F, et al. Toremifene versus tamoxifen for advanced breast  
30  
31 cancer. Cochrane Database of Systematic Reviews 2012; (7).

32  
33 <http://onlinelibrary.wiley.com/doi/10.1002/14651858.CD008926.pub2/abstract>  
34  
35  
36 t.

37  
38 182. Martí-Carvajal Arturo J, Anand V, Solà I. Treatment for disseminated intravascular  
39  
40 coagulation in patients with acute and chronic leukemia. Cochrane Database of  
41  
42 Systematic Reviews 2015; (6).

43  
44 <http://onlinelibrary.wiley.com/doi/10.1002/14651858.CD008562.pub3/abstract>  
45  
46  
47 t.

48  
49  
50 183. Martin-Hirsch Pierre PL, Bryant A. Interventions for preventing blood loss during  
51  
52 the treatment of cervical intraepithelial neoplasia. Cochrane Database of  
53  
54 Systematic Reviews 2013; (12).

55  
56 <http://onlinelibrary.wiley.com/doi/10.1002/14651858.CD001421.pub3/abstract>  
57  
58  
59 t.

- 1  
2  
3 184. Martin-Hirsch Pierre PL, Bryant A, Keep Sarah L, et al. Adjuvant progestagens for  
4  
5 endometrial cancer. Cochrane Database of Systematic Reviews 2011; (6).  
6  
7 [http://onlinelibrary.wiley.com/doi/10.1002/14651858.CD001040.pub2/abstrac](http://onlinelibrary.wiley.com/doi/10.1002/14651858.CD001040.pub2/abstract)  
8  
9 [t.](http://onlinelibrary.wiley.com/doi/10.1002/14651858.CD001040.pub2/abstract)  
10  
11  
12 185. Martin-Hirsch Pierre PL, Paraskevaidis E, Bryant A, et al. Surgery for cervical  
13  
14 intraepithelial neoplasia. Cochrane Database of Systematic Reviews 2013; (12).  
15  
16 [http://onlinelibrary.wiley.com/doi/10.1002/14651858.CD001318.pub3/abstrac](http://onlinelibrary.wiley.com/doi/10.1002/14651858.CD001318.pub3/abstract)  
17  
18 [t.](http://onlinelibrary.wiley.com/doi/10.1002/14651858.CD001318.pub3/abstract)  
19  
20  
21 186. Masterson L, Moualed D, Masood A, et al. De-escalation treatment protocols for  
22  
23 human papillomavirus-associated oropharyngeal squamous cell carcinoma.  
24  
25 Cochrane Database of Systematic Reviews 2014; (2).  
26  
27 [http://onlinelibrary.wiley.com/doi/10.1002/14651858.CD010271.pub2/abstrac](http://onlinelibrary.wiley.com/doi/10.1002/14651858.CD010271.pub2/abstract)  
28  
29 [t.](http://onlinelibrary.wiley.com/doi/10.1002/14651858.CD010271.pub2/abstract)  
30  
31  
32 187. McCarthy K, Pearson K, Fulton R, et al. Pre-operative chemoradiation for non-  
33  
34 metastatic locally advanced rectal cancer. Cochrane Database of Systematic  
35  
36 Reviews 2012; (12).  
37  
38 [http://onlinelibrary.wiley.com/doi/10.1002/14651858.CD008368.pub2/abstrac](http://onlinelibrary.wiley.com/doi/10.1002/14651858.CD008368.pub2/abstract)  
39  
40 [t.](http://onlinelibrary.wiley.com/doi/10.1002/14651858.CD008368.pub2/abstract)  
41  
42  
43 188. Mei L, Chen H, Wei Dong M, et al. Maintenance chemotherapy for ovarian cancer.  
44  
45 Cochrane Database of Systematic Reviews 2013; (6).  
46  
47 [http://onlinelibrary.wiley.com/doi/10.1002/14651858.CD007414.pub3/abstrac](http://onlinelibrary.wiley.com/doi/10.1002/14651858.CD007414.pub3/abstract)  
48  
49 [t.](http://onlinelibrary.wiley.com/doi/10.1002/14651858.CD007414.pub3/abstract)  
50  
51  
52 189. Mhaskar R, Clark Otavio Augusto C, Lyman G, et al. Colony-stimulating factors for  
53  
54 chemotherapy-induced febrile neutropenia. Cochrane Database of Systematic  
55  
56 Reviews 2014; (10).  
57  
58  
59  
60

1  
2  
3 <http://onlinelibrary.wiley.com/doi/10.1002/14651858.CD003039.pub2/abstract>  
4  
5  
6 t.

7  
8 190. Mhaskar R, Redzepovic J, Wheatley K, et al. Bisphosphonates in multiple myeloma:  
9  
10 a network meta-analysis. Cochrane Database of Systematic Reviews 2012; (5).

11  
12 <http://onlinelibrary.wiley.com/doi/10.1002/14651858.CD003188.pub3/abstract>  
13  
14  
15 t.

16  
17 191. Mhaskar R, Wao H, Miladinovic B, et al. The role of iron in the management of  
18  
19 chemotherapy-induced anemia in cancer patients receiving erythropoiesis-  
20  
21 stimulating agents. Cochrane Database of Systematic Reviews 2016; (2).

22  
23 <http://onlinelibrary.wiley.com/doi/10.1002/14651858.CD009624.pub2/abstract>  
24  
25  
26 t.

27  
28 192. Mical P, Borok S, Vidal L, et al. Empirical antibiotics targeting gram-positive  
29  
30 bacteria for the treatment of febrile neutropenic patients with cancer. Cochrane  
31  
32 Database of Systematic Reviews 2014; (6).

33  
34 <http://onlinelibrary.wiley.com/doi/10.1002/14651858.CD003914.pub4/abstract>  
35  
36  
37 t.

38  
39 193. Michiels Erna MC, Schouten-Van Meeteren Antoinette YN, Doz F, et al.

40  
41  
42 Chemotherapy for children with medulloblastoma. Cochrane Database of  
43  
44 Systematic Reviews 2015; (1).

45  
46 <http://onlinelibrary.wiley.com/doi/10.1002/14651858.CD006678.pub2/abstract>  
47  
48  
49 t.

50  
51 194. Milazzo S, Horneber M. Laetrile treatment for cancer. Cochrane Database of  
52  
53 Systematic Reviews 2015; (4).

54  
55 <http://onlinelibrary.wiley.com/doi/10.1002/14651858.CD005476.pub4/abstract>  
56  
57  
58 t.  
59  
60

- 1  
2  
3 195. Miles T, Johnson N. Vaginal dilator therapy for women receiving pelvic  
4  
5 radiotherapy. Cochrane Database of Systematic Reviews 2014; (9).  
6  
7 <http://onlinelibrary.wiley.com/doi/10.1002/14651858.CD007291.pub3/abstract>  
8  
9  
10  
11  
12 196. Mishra Shiraz I, Scherer Roberta W, Geigle Paula M, et al. Exercise interventions on  
13  
14 health-related quality of life for cancer survivors. Cochrane Database of  
15  
16 Systematic Reviews 2012; (8).  
17  
18 <http://onlinelibrary.wiley.com/doi/10.1002/14651858.CD007566.pub2/abstract>  
19  
20  
21  
22  
23 197. Mishra Shiraz I, Scherer Roberta W, Snyder C, et al. Exercise interventions on  
24  
25 health-related quality of life for people with cancer during active treatment.  
26  
27 Cochrane Database of Systematic Reviews 2012; (8).  
28  
29 <http://onlinelibrary.wiley.com/doi/10.1002/14651858.CD008465.pub2/abstract>  
30  
31  
32  
33  
34  
35 198. Mocellin S, Lens Marko B, Pasquali S, et al. Interferon alpha for the adjuvant  
36  
37 treatment of cutaneous melanoma. Cochrane Database of Systematic Reviews  
38  
39 2013; (6).  
40  
41 <http://onlinelibrary.wiley.com/doi/10.1002/14651858.CD008955.pub2/abstract>  
42  
43  
44  
45  
46  
47 199. Mocellin S, McCulloch P, Kazi H, et al. Extent of lymph node dissection for  
48  
49 adenocarcinoma of the stomach. Cochrane Database of Systematic Reviews 2015;  
50  
51 (8).  
52  
53 <http://onlinelibrary.wiley.com/doi/10.1002/14651858.CD001964.pub4/abstract>  
54  
55  
56  
57  
58  
59  
60

- 1  
2  
3 200. Mocellin S, Pasquali S. Diagnostic accuracy of endoscopic ultrasonography (EUS) for  
4 the preoperative locoregional staging of primary gastric cancer. Cochrane  
5 Database of Systematic Reviews 2015; (2).  
6  
7  
8  
9  
10 <http://onlinelibrary.wiley.com/doi/10.1002/14651858.CD009944.pub2/abstract>  
11  
12  
13  
14  
15 201. Moja L, Tagliabue L, Balduzzi S, et al. Trastuzumab containing regimens for early  
16 breast cancer. Cochrane Database of Systematic Reviews 2012; (4).  
17  
18  
19 <http://onlinelibrary.wiley.com/doi/10.1002/14651858.CD006243.pub2/abstract>  
20  
21  
22  
23  
24 202. Molassiotis A, Bailey C, Caress A, et al. Interventions for cough in cancer. Cochrane  
25 Database of Systematic Reviews 2015; (5).  
26  
27  
28 <http://onlinelibrary.wiley.com/doi/10.1002/14651858.CD007881.pub3/abstract>  
29  
30  
31  
32  
33 203. Moore Philippa M, Rivera Mercado S, Grez Artigues M, et al. Communication skills  
34 training for healthcare professionals working with people who have cancer.  
35  
36  
37  
38  
39  
40  
41  
42  
43  
44  
45  
46  
47  
48  
49  
50  
51  
52  
53  
54  
55  
56  
57 204. Morrison J, Haldar K, Kehoe S, et al. Chemotherapy versus surgery for initial  
58 treatment in advanced ovarian epithelial cancer. Cochrane Database of  
59  
60  
61  
62  
63  
64  
65  
66  
67  
68  
69  
70  
71  
72  
73  
74  
75  
76  
77  
78  
79  
80  
81  
82  
83  
84  
85  
86  
87  
88  
89  
90  
91  
92  
93  
94  
95  
96  
97  
98  
99  
100  
101  
102  
103  
104  
105  
106  
107  
108  
109  
110  
111  
112  
113  
114  
115  
116  
117  
118  
119  
120  
121  
122  
123  
124  
125  
126  
127  
128  
129  
130  
131  
132  
133  
134  
135  
136  
137  
138  
139  
140  
141  
142  
143  
144  
145  
146  
147  
148  
149  
150  
151  
152  
153  
154  
155  
156  
157  
158  
159  
160  
161  
162  
163  
164  
165  
166  
167  
168  
169  
170  
171  
172  
173  
174  
175  
176  
177  
178  
179  
180  
181  
182  
183  
184  
185  
186  
187  
188  
189  
190  
191  
192  
193  
194  
195  
196  
197  
198  
199  
200  
201  
202  
203  
204  
205  
206  
207  
208  
209  
210  
211  
212  
213  
214  
215  
216  
217  
218  
219  
220  
221  
222  
223  
224  
225  
226  
227  
228  
229  
230  
231  
232  
233  
234  
235  
236  
237  
238  
239  
240  
241  
242  
243  
244  
245  
246  
247  
248  
249  
250  
251  
252  
253  
254  
255  
256  
257  
258  
259  
260  
261  
262  
263  
264  
265  
266  
267  
268  
269  
270  
271  
272  
273  
274  
275  
276  
277  
278  
279  
280  
281  
282  
283  
284  
285  
286  
287  
288  
289  
290  
291  
292  
293  
294  
295  
296  
297  
298  
299  
300  
301  
302  
303  
304  
305  
306  
307  
308  
309  
310  
311  
312  
313  
314  
315  
316  
317  
318  
319  
320  
321  
322  
323  
324  
325  
326  
327  
328  
329  
330  
331  
332  
333  
334  
335  
336  
337  
338  
339  
340  
341  
342  
343  
344  
345  
346  
347  
348  
349  
350  
351  
352  
353  
354  
355  
356  
357  
358  
359  
360  
361  
362  
363  
364  
365  
366  
367  
368  
369  
370  
371  
372  
373  
374  
375  
376  
377  
378  
379  
380  
381  
382  
383  
384  
385  
386  
387  
388  
389  
390  
391  
392  
393  
394  
395  
396  
397  
398  
399  
400  
401  
402  
403  
404  
405  
406  
407  
408  
409  
410  
411  
412  
413  
414  
415  
416  
417  
418  
419  
420  
421  
422  
423  
424  
425  
426  
427  
428  
429  
430  
431  
432  
433  
434  
435  
436  
437  
438  
439  
440  
441  
442  
443  
444  
445  
446  
447  
448  
449  
450  
451  
452  
453  
454  
455  
456  
457  
458  
459  
460  
461  
462  
463  
464  
465  
466  
467  
468  
469  
470  
471  
472  
473  
474  
475  
476  
477  
478  
479  
480  
481  
482  
483  
484  
485  
486  
487  
488  
489  
490  
491  
492  
493  
494  
495  
496  
497  
498  
499  
500  
501  
502  
503  
504  
505  
506  
507  
508  
509  
510  
511  
512  
513  
514  
515  
516  
517  
518  
519  
520  
521  
522  
523  
524  
525  
526  
527  
528  
529  
530  
531  
532  
533  
534  
535  
536  
537  
538  
539  
540  
541  
542  
543  
544  
545  
546  
547  
548  
549  
550  
551  
552  
553  
554  
555  
556  
557  
558  
559  
560  
561  
562  
563  
564  
565  
566  
567  
568  
569  
570  
571  
572  
573  
574  
575  
576  
577  
578  
579  
580  
581  
582  
583  
584  
585  
586  
587  
588  
589  
590  
591  
592  
593  
594  
595  
596  
597  
598  
599  
600  
601  
602  
603  
604  
605  
606  
607  
608  
609  
610  
611  
612  
613  
614  
615  
616  
617  
618  
619  
620  
621  
622  
623  
624  
625  
626  
627  
628  
629  
630  
631  
632  
633  
634  
635  
636  
637  
638  
639  
640  
641  
642  
643  
644  
645  
646  
647  
648  
649  
650  
651  
652  
653  
654  
655  
656  
657  
658  
659  
660  
661  
662  
663  
664  
665  
666  
667  
668  
669  
670  
671  
672  
673  
674  
675  
676  
677  
678  
679  
680  
681  
682  
683  
684  
685  
686  
687  
688  
689  
690  
691  
692  
693  
694  
695  
696  
697  
698  
699  
700  
701  
702  
703  
704  
705  
706  
707  
708  
709  
710  
711  
712  
713  
714  
715  
716  
717  
718  
719  
720  
721  
722  
723  
724  
725  
726  
727  
728  
729  
730  
731  
732  
733  
734  
735  
736  
737  
738  
739  
740  
741  
742  
743  
744  
745  
746  
747  
748  
749  
750  
751  
752  
753  
754  
755  
756  
757  
758  
759  
760  
761  
762  
763  
764  
765  
766  
767  
768  
769  
770  
771  
772  
773  
774  
775  
776  
777  
778  
779  
780  
781  
782  
783  
784  
785  
786  
787  
788  
789  
790  
791  
792  
793  
794  
795  
796  
797  
798  
799  
800  
801  
802  
803  
804  
805  
806  
807  
808  
809  
810  
811  
812  
813  
814  
815  
816  
817  
818  
819  
820  
821  
822  
823  
824  
825  
826  
827  
828  
829  
830  
831  
832  
833  
834  
835  
836  
837  
838  
839  
840  
841  
842  
843  
844  
845  
846  
847  
848  
849  
850  
851  
852  
853  
854  
855  
856  
857  
858  
859  
860  
861  
862  
863  
864  
865  
866  
867  
868  
869  
870  
871  
872  
873  
874  
875  
876  
877  
878  
879  
880  
881  
882  
883  
884  
885  
886  
887  
888  
889  
890  
891  
892  
893  
894  
895  
896  
897  
898  
899  
900  
901  
902  
903  
904  
905  
906  
907  
908  
909  
910  
911  
912  
913  
914  
915  
916  
917  
918  
919  
920  
921  
922  
923  
924  
925  
926  
927  
928  
929  
930  
931  
932  
933  
934  
935  
936  
937  
938  
939  
940  
941  
942  
943  
944  
945  
946  
947  
948  
949  
950  
951  
952  
953  
954  
955  
956  
957  
958  
959  
960  
961  
962  
963  
964  
965  
966  
967  
968  
969  
970  
971  
972  
973  
974  
975  
976  
977  
978  
979  
980  
981  
982  
983  
984  
985  
986  
987  
988  
989  
990  
991  
992  
993  
994  
995  
996  
997  
998  
999  
1000
200. Mocellin S, Pasquali S. Diagnostic accuracy of endoscopic ultrasonography (EUS) for the preoperative locoregional staging of primary gastric cancer. Cochrane Database of Systematic Reviews 2015; (2).  
<http://onlinelibrary.wiley.com/doi/10.1002/14651858.CD009944.pub2/abstract>
201. Moja L, Tagliabue L, Balduzzi S, et al. Trastuzumab containing regimens for early breast cancer. Cochrane Database of Systematic Reviews 2012; (4).  
<http://onlinelibrary.wiley.com/doi/10.1002/14651858.CD006243.pub2/abstract>
202. Molassiotis A, Bailey C, Caress A, et al. Interventions for cough in cancer. Cochrane Database of Systematic Reviews 2015; (5).  
<http://onlinelibrary.wiley.com/doi/10.1002/14651858.CD007881.pub3/abstract>
203. Moore Philippa M, Rivera Mercado S, Grez Artigues M, et al. Communication skills training for healthcare professionals working with people who have cancer. Cochrane Database of Systematic Reviews 2013; (3).  
<http://onlinelibrary.wiley.com/doi/10.1002/14651858.CD003751.pub3/abstract>
204. Morrison J, Haldar K, Kehoe S, et al. Chemotherapy versus surgery for initial treatment in advanced ovarian epithelial cancer. Cochrane Database of Systematic Reviews 2012; (8).  
<http://onlinelibrary.wiley.com/doi/10.1002/14651858.CD005343.pub3/abstract>
205. Moschetti I, Cinquini M, Lambertini M, et al. Follow-up strategies for women treated for early breast cancer. Cochrane Database of Systematic Reviews 2016; (5).

1  
2  
3 <http://onlinelibrary.wiley.com/doi/10.1002/14651858.CD001768.pub3/abstract>  
4  
5  
6 t.

7  
8 206. Muchtar E, Vidal L, Ram R, et al. The role of maintenance therapy in acute  
9  
10 promyelocytic leukemia in the first complete remission. Cochrane Database of  
11  
12 Systematic Reviews 2013; (3).

13  
14 <http://onlinelibrary.wiley.com/doi/10.1002/14651858.CD009594.pub2/abstract>  
15  
16  
17 t.

18  
19 207. Mulder Renée L, Paulides M, Langer T, et al. Cyclophosphamide versus ifosfamide  
20  
21 for paediatric and young adult bone and soft tissue sarcoma patients. Cochrane  
22  
23 Database of Systematic Reviews 2015; (9).

24  
25 <http://onlinelibrary.wiley.com/doi/10.1002/14651858.CD006300.pub4/abstract>  
26  
27  
28 t.

29  
30 208. Mulder Renée L, van Dalen Elvira C, Van den Hof M, et al. Hepatic late adverse  
31  
32 effects after antineoplastic treatment for childhood cancer. Cochrane Database of  
33  
34 Systematic Reviews 2011; (7).

35  
36 <http://onlinelibrary.wiley.com/doi/10.1002/14651858.CD008205.pub2/abstract>  
37  
38  
39 t.

40  
41 209. Mustafa M, Carson-Stevens A, Gillespie D, et al. Psychological interventions for  
42  
43 women with metastatic breast cancer. Cochrane Database of Systematic Reviews  
44  
45 2013; (6).

46  
47 <http://onlinelibrary.wiley.com/doi/10.1002/14651858.CD004253.pub4/abstract>  
48  
49  
50 t.

51  
52 210. Nagorni A, Bjelakovic G, Petrovic B. Narrow band imaging versus conventional  
53  
54 white light colonoscopy for the detection of colorectal polyps. Cochrane Database  
55  
56 of Systematic Reviews 2012; (1).



1  
2  
3 <http://onlinelibrary.wiley.com/doi/10.1002/14651858.CD008361.pub2/abstract>  
4  
5  
6 t.

7  
8 211. Nama V, Nordin A, Bryant A. Patient-reported outcome measures for follow-up after  
9  
10 gynaecological cancer treatment. Cochrane Database of Systematic Reviews  
11  
12 2013; (11).

13  
14 <http://onlinelibrary.wiley.com/doi/10.1002/14651858.CD010299.pub2/abstract>  
15  
16  
17 t.

18  
19 212. Narayanan K, Hadid Omar H, Barnes Eric A. Mohs micrographic surgery versus  
20  
21 surgical excision for periocular basal cell carcinoma. Cochrane Database of  
22  
23 Systematic Reviews 2014; (12).

24  
25 <http://onlinelibrary.wiley.com/doi/10.1002/14651858.CD007041.pub4/abstract>  
26  
27  
28 t.

29  
30 213. Naumann-Winter F, Greb A, Borchmann P, et al. First-line tandem high-dose  
31  
32 chemotherapy and autologous stem cell transplantation versus single high-dose  
33  
34 chemotherapy and autologous stem cell transplantation in multiple myeloma, a  
35  
36 systematic review of controlled studies. Cochrane Database of Systematic  
37  
38 Reviews 2012; (10).

39  
40  
41 <http://onlinelibrary.wiley.com/doi/10.1002/14651858.CD004626.pub3/abstract>  
42  
43  
44 t.

45  
46 214. Nicholson Brian D, Shinkins B, Pathiraja I, et al. Blood CEA levels for detecting  
47  
48 recurrent colorectal cancer. Cochrane Database of Systematic Reviews 2015;  
49  
50 (12).

51  
52 <http://onlinelibrary.wiley.com/doi/10.1002/14651858.CD011134.pub2/abstract>  
53  
54  
55  
56 t.

- 1  
2  
3 215. Nugent B, Lewis S, O'Sullivan Joe M. Enteral feeding methods for nutritional  
4 management in patients with head and neck cancers being treated with  
5 radiotherapy and/or chemotherapy. Cochrane Database of Systematic Reviews  
6 2013; (1).  
7  
8 <http://onlinelibrary.wiley.com/doi/10.1002/14651858.CD007904.pub3/abstract>  
9  
10  
11  
12  
13  
14  
15  
16  
17 216. O'Connor A, McNamara D, O'Moráin Colm A. Surveillance of gastric intestinal  
18 metaplasia for the prevention of gastric cancer. Cochrane Database of Systematic  
19 Reviews 2013; (9).  
20  
21 <http://onlinelibrary.wiley.com/doi/10.1002/14651858.CD009322.pub2/abstract>  
22  
23  
24  
25  
26  
27  
28  
29 217. Okebe Joseph U, Skoetz N, Meremikwu Martin M, et al. Therapeutic interventions  
30 for Burkitt lymphoma in children. Cochrane Database of Systematic Reviews  
31 2011; (7).  
32  
33 <http://onlinelibrary.wiley.com/doi/10.1002/14651858.CD005198.pub3/abstract>  
34  
35  
36  
37  
38  
39  
40 218. Oliveri Roberto S, Wetterslev J, Gluud C. Transarterial (chemo)embolisation for  
41 unresectable hepatocellular carcinoma. Cochrane Database of Systematic  
42 Reviews 2011; (3).  
43  
44 <http://onlinelibrary.wiley.com/doi/10.1002/14651858.CD004787.pub2/abstract>  
45  
46  
47  
48  
49  
50  
51  
52 219. Ostuzzi G, Matcham F, Dauchy S, et al. Antidepressants for the treatment of  
53 depression in people with cancer. Cochrane Database of Systematic Reviews  
54 2015; (6).  
55  
56  
57  
58  
59  
60

1  
2  
3 <http://onlinelibrary.wiley.com/doi/10.1002/14651858.CD011006.pub2/abstract>  
4  
5  
6 t.

7  
8 220. Pachler J, Wille-Jørgensen P. Quality of life after rectal resection for cancer, with or  
9  
10 without permanent colostomy. Cochrane Database of Systematic Reviews 2012;  
11  
12 (12).

13  
14  
15 <http://onlinelibrary.wiley.com/doi/10.1002/14651858.CD004323.pub4/abstract>  
16  
17  
18 t.

19  
20 221. Paley Carole A, Johnson Mark I, Tashani Osama A, et al. Acupuncture for cancer pain  
21  
22 in adults. Cochrane Database of Systematic Reviews 2015; (10).

23  
24 <http://onlinelibrary.wiley.com/doi/10.1002/14651858.CD007753.pub3/abstract>  
25  
26  
27 t.

28  
29 222. Parahoo K, McDonough S, McCaughan E, et al. Psychosocial interventions for men  
30  
31 with prostate cancer. Cochrane Database of Systematic Reviews 2013; (12).

32  
33 <http://onlinelibrary.wiley.com/doi/10.1002/14651858.CD008529.pub3/abstract>  
34  
35  
36 t.

37  
38 223. Patil Chirag G, Pricola K, Sarmiento JM, et al. Whole brain radiation therapy (WBRT)  
39  
40 alone versus WBRT and radiosurgery for the treatment of brain metastases.  
41  
42 Cochrane Database of Systematic Reviews 2012; (9).

43  
44 <http://onlinelibrary.wiley.com/doi/10.1002/14651858.CD006121.pub3/abstract>  
45  
46  
47 t.

48  
49 224. Paul M, Dickstein Y, Schlesinger A, et al. Beta-lactam versus beta-lactam-  
50  
51 aminoglycoside combination therapy in cancer patients with neutropenia.  
52  
53 Cochrane Database of Systematic Reviews 2013; (6).

54  
55 <http://onlinelibrary.wiley.com/doi/10.1002/14651858.CD003038.pub2/abstract>  
56  
57  
58 t.

- 1  
2  
3 225. Peinemann F, Bartel C, Grouven U. First-line allogeneic hematopoietic stem cell  
4  
5 transplantation of HLA-matched sibling donors compared with first-line  
6  
7 ciclosporin and/or antithymocyte or antilymphocyte globulin for acquired severe  
8  
9 aplastic anemia. Cochrane Database of Systematic Reviews 2013; (7).  
10  
11 <http://onlinelibrary.wiley.com/doi/10.1002/14651858.CD006407.pub2/abstract>  
12  
13  
14  
15 t.
- 16  
17 226. Peinemann F, Enk H, Smith Lesley A. Autologous hematopoietic stem cell  
18  
19 transplantation following high-dose chemotherapy for nonrhabdomyosarcoma  
20  
21 soft tissue sarcomas. Cochrane Database of Systematic Reviews 2013; (4).  
22  
23 <http://onlinelibrary.wiley.com/doi/10.1002/14651858.CD008216.pub5/abstract>  
24  
25  
26  
27 t.
- 28  
29 227. Peinemann F, Grouven U, Hemkens Lars G, et al. Low-dose rate brachytherapy for  
30  
31 men with localized prostate cancer. Cochrane Database of Systematic Reviews  
32  
33 2011; (7).  
34  
35 <http://onlinelibrary.wiley.com/doi/10.1002/14651858.CD008871.pub2/abstract>  
36  
37  
38  
39 t.
- 40  
41 228. Peinemann F, Kahangire Doreen A, van Dalen Elvira C, et al. Rapid COJEC versus  
42  
43 standard induction therapies for high-risk neuroblastoma. Cochrane Database of  
44  
45 Systematic Reviews 2015; (5).  
46  
47 <http://onlinelibrary.wiley.com/doi/10.1002/14651858.CD010774.pub2/abstract>  
48  
49  
50  
51 t.
- 52  
53 229. Peinemann F, van Dalen Elvira C, Kahangire Doreen A, et al. Retinoic acid post  
54  
55 consolidation therapy for high-risk neuroblastoma patients treated with  
56  
57 autologous hematopoietic stem cell transplantation. Cochrane Database of  
58  
59 Systematic Reviews 2015; (1).  
60

1  
2  
3 <http://onlinelibrary.wiley.com/doi/10.1002/14651858.CD010685.pub2/abstract>  
4  
5  
6 t.

7  
8 230. Pelayo Alvarez M, Westeel V, Cortés-Jofré M, et al. Chemotherapy versus best  
9  
10 supportive care for extensive small cell lung cancer. Cochrane Database of  
11  
12 Systematic Reviews 2013; (11).

13  
14  
15 <http://onlinelibrary.wiley.com/doi/10.1002/14651858.CD001990.pub3/abstract>  
16  
17  
18 t.

19  
20 231. Peng L, Min S, Zejun Z, et al. Spinal cord stimulation for cancer-related pain in  
21  
22 adults. Cochrane Database of Systematic Reviews 2015; (6).

23  
24 <http://onlinelibrary.wiley.com/doi/10.1002/14651858.CD009389.pub3/abstract>  
25  
26  
27 t.

28  
29 232. Pepas L, Kaushik S, Nordin A, et al. Medical interventions for high-grade vulval  
30  
31 intraepithelial neoplasia. Cochrane Database of Systematic Reviews 2015; (8).

32  
33 <http://onlinelibrary.wiley.com/doi/10.1002/14651858.CD007924.pub3/abstract>  
34  
35  
36 t.

37  
38 233. Petersen Sune H, Harling H, Kirkeby Lene T, et al. Postoperative adjuvant  
39  
40 chemotherapy in rectal cancer operated for cure. Cochrane Database of  
41  
42 Systematic Reviews 2012; (3).

43  
44 <http://onlinelibrary.wiley.com/doi/10.1002/14651858.CD004078.pub2/abstract>  
45  
46  
47 t.

48  
49 234. Phillips Robert S, Friend Amanda J, Gibson F, et al. Antiemetic medication for  
50  
51 prevention and treatment of chemotherapy-induced nausea and vomiting in  
52  
53 childhood. Cochrane Database of Systematic Reviews 2016; (2).

54  
55 <http://onlinelibrary.wiley.com/doi/10.1002/14651858.CD007786.pub3/abstract>  
56  
57  
58 t.  
59  
60

- 1  
2  
3 235. Pidala J, Djulbegovic B, Anasetti C, et al. Allogeneic hematopoietic cell  
4  
5 transplantation for adult acute lymphoblastic leukemia (ALL) in first complete  
6  
7 remission. Cochrane Database of Systematic Reviews 2011; (10).  
8  
9  
10 <http://onlinelibrary.wiley.com/doi/10.1002/14651858.CD008818.pub2/abstract>  
11  
12  
13 t.
- 14  
15 236. Preston Nancy J, Hurlow A, Brine J, et al. Blood transfusions for anaemia in patients  
16  
17 with advanced cancer. Cochrane Database of Systematic Reviews 2012; (2).  
18  
19 <http://onlinelibrary.wiley.com/doi/10.1002/14651858.CD009007.pub2/abstract>  
20  
21  
22 t.
- 23  
24 237. Rai Bhavan P, Shelley M, Coles B, et al. Surgical management for upper urinary tract  
25  
26 transitional cell carcinoma. Cochrane Database of Systematic Reviews 2011; (4).  
27  
28 <http://onlinelibrary.wiley.com/doi/10.1002/14651858.CD007349.pub2/abstract>  
29  
30  
31 t.
- 32  
33 238. Rancea M, Monsef I, von Tresckow B, et al. High-dose chemotherapy followed by  
34  
35 autologous stem cell transplantation for patients with relapsed/refractory  
36  
37 Hodgkin lymphoma. Cochrane Database of Systematic Reviews 2013; (6).  
38  
39 <http://onlinelibrary.wiley.com/doi/10.1002/14651858.CD009411.pub2/abstract>  
40  
41  
42 t.
- 43  
44 239. Rao Ahsan M, Ahmed I. Laparoscopic versus open liver resection for benign and  
45  
46 malignant hepatic lesions in adults. Cochrane Database of Systematic Reviews  
47  
48 2013; (5).  
49  
50 <http://onlinelibrary.wiley.com/doi/10.1002/14651858.CD010162.pub2/abstract>  
51  
52  
53 t.
- 54  
55  
56  
57 240. Ratnavelu Nithya DG, Brown Andrew P, Mallett S, et al. Intraoperative frozen  
58  
59 section analysis for the diagnosis of early stage ovarian cancer in suspicious  
60

1  
2  
3 pelvic masses. Cochrane Database of Systematic Reviews 2016; (3).

4 <http://onlinelibrary.wiley.com/doi/10.1002/14651858.CD010360.pub2/abstract>  
5  
6  
7  
8 t.

9  
10 241. Reid J, Mills M, Cantwell M, et al. Thalidomide for managing cancer cachexia.

11  
12 Cochrane Database of Systematic Reviews 2012; (4).

13 <http://onlinelibrary.wiley.com/doi/10.1002/14651858.CD008664.pub2/abstract>  
14  
15  
16  
17 t.

18  
19 242. Renner P, Milazzo S, Liu Jian P, et al. Primary prophylactic colony-stimulating

20  
21 factors for the prevention of chemotherapy-induced febrile neutropenia in breast  
22  
23 cancer patients. Cochrane Database of Systematic Reviews 2012; (10).

24  
25 <http://onlinelibrary.wiley.com/doi/10.1002/14651858.CD007913.pub2/abstract>  
26  
27  
28  
29 t.

30  
31 243. Resende Heloisa M, Jacob Luiz Felipe P, Quinellato Luciano V, et al. Combination

32  
33 chemotherapy versus single-agent chemotherapy during preoperative

34  
35 chemoradiation for resectable rectal cancer. Cochrane Database of Systematic  
36  
37 Reviews 2015; (10).

38  
39 <http://onlinelibrary.wiley.com/doi/10.1002/14651858.CD008531.pub2/abstract>  
40  
41  
42  
43 t.

44  
45 244. Reveiz L, Rueda J-R, Cardona Andrés F. Palliative endobronchial brachytherapy for

46  
47 non-small cell lung cancer. Cochrane Database of Systematic Reviews 2012; (12).

48  
49 <http://onlinelibrary.wiley.com/doi/10.1002/14651858.CD004284.pub3/abstract>  
50  
51  
52  
53 t.

54  
55 245. Reveiz L, Rueda J-R, Cardona Andrés F. Chemotherapy for brain metastases from

56  
57 small cell lung cancer. Cochrane Database of Systematic Reviews 2012; (6).

58  
59  
60

1  
2  
3 <http://onlinelibrary.wiley.com/doi/10.1002/14651858.CD007464.pub2/abstract>  
4  
5  
6 t.

7  
8 246. Riemsma Robert P, Bala Malgorzata M, Wolff R, et al. Percutaneous ethanol  
9  
10 injection for liver metastases. Cochrane Database of Systematic Reviews 2013;  
11  
12 (5).

13  
14 <http://onlinelibrary.wiley.com/doi/10.1002/14651858.CD008717.pub2/abstract>  
15  
16  
17 t.

18  
19 247. Riemsma Robert P, Bala Malgorzata M, Wolff R, et al. Electro-coagulation for liver  
20  
21 metastases. Cochrane Database of Systematic Reviews 2013; (5).

22  
23 <http://onlinelibrary.wiley.com/doi/10.1002/14651858.CD009497.pub2/abstract>  
24  
25  
26 t.

27  
28 248. Riemsma Robert P, Bala Malgorzata M, Wolff R, et al. Transarterial  
29  
30 (chemo)embolisation versus no intervention or placebo intervention for liver  
31  
32 metastases. Cochrane Database of Systematic Reviews 2013; (4).

33  
34 <http://onlinelibrary.wiley.com/doi/10.1002/14651858.CD009498.pub3/abstract>  
35  
36  
37 t.

38  
39 249. Riviere D, Gurusamy Kurinchi S, Kooby David A, et al. Laparoscopic versus open  
40  
41 distal pancreatectomy for pancreatic cancer. Cochrane Database of Systematic  
42  
43 Reviews 2016; (4).

44  
45 <http://onlinelibrary.wiley.com/doi/10.1002/14651858.CD011391.pub2/abstract>  
46  
47  
48 t.

49  
50 250. Rizzuto I, Behrens Renee F, Smith Lesley A. Risk of ovarian cancer in women treated  
51  
52 with ovarian stimulating drugs for infertility. Cochrane Database of Systematic  
53  
54 Reviews 2013; (8).



1  
2  
3 <http://onlinelibrary.wiley.com/doi/10.1002/14651858.CD008215.pub2/abstract>  
4  
5  
6 t.

7  
8 251. Robertson L, Yeoh Su E, Stansby G, et al. Effect of testing for cancer on cancer- and  
9  
10 venous thromboembolism (VTE)-related mortality and morbidity in patients  
11  
12 with unprovoked VTE. Cochrane Database of Systematic Reviews 2015; (3).

13  
14  
15 <http://onlinelibrary.wiley.com/doi/10.1002/14651858.CD010837.pub2/abstract>  
16  
17  
18 t.

19  
20 252. Rogers L, Siu Shing Shun N, Luesley D, et al. Radiotherapy and chemoradiation after  
21  
22 surgery for early cervical cancer. Cochrane Database of Systematic Reviews 2012;  
23  
24 (5).

25  
26  
27 <http://onlinelibrary.wiley.com/doi/10.1002/14651858.CD007583.pub3/abstract>  
28  
29  
30 t.

31  
32 253. Ronellenfitsch U, Schwarzbach M, Hofheinz R, et al. Perioperative  
33  
34 chemo(radio)therapy versus primary surgery for resectable adenocarcinoma of  
35  
36 the stomach, gastroesophageal junction, and lower esophagus. Cochrane  
37  
38 Database of Systematic Reviews 2013; (5).

39  
40  
41 <http://onlinelibrary.wiley.com/doi/10.1002/14651858.CD008107.pub2/abstract>  
42  
43  
44 t.

45  
46 254. Rooney Alasdair G, Grant R. Pharmacological treatment of depression in patients  
47  
48 with a primary brain tumour. Cochrane Database of Systematic Reviews 2013;  
49  
50 (5).

51  
52  
53 <http://onlinelibrary.wiley.com/doi/10.1002/14651858.CD006932.pub3/abstract>  
54  
55  
56 t.

57  
58 255. Roqué i Figuls M, Martinez-Zapata Maria J, Scott-Brown M, et al. Radioisotopes for  
59  
60 metastatic bone pain. Cochrane Database of Systematic Reviews 2011; (3).

1  
2  
3 <http://onlinelibrary.wiley.com/doi/10.1002/14651858.CD003347.pub3/abstract>  
4  
5  
6 t.

7  
8 256. Rosa D, Medeiros L, Edelweiss MI, et al. Adjuvant platinum-based chemotherapy for  
9  
10 early stage cervical cancer. Cochrane Database of Systematic Reviews 2012; (11).

11  
12 <http://onlinelibrary.wiley.com/doi/10.1002/14651858.CD005342.pub4/abstract>  
13  
14  
15 t.

16  
17 257. Rueda J-R, Solà I, Pascual A, et al. Non-invasive interventions for improving well-  
18  
19 being and quality of life in patients with lung cancer. Cochrane Database of  
20  
21 Systematic Reviews 2011; (9).

22  
23 <http://onlinelibrary.wiley.com/doi/10.1002/14651858.CD004282.pub3/abstract>  
24  
25  
26 t.

27  
28  
29 258. Rutten Marianne J, Leeflang Mariska MG, Kenter Gemma G, et al. Laparoscopy for  
30  
31 diagnosing resectability of disease in patients with advanced ovarian cancer.  
32  
33 Cochrane Database of Systematic Reviews 2014; (2).

34  
35 <http://onlinelibrary.wiley.com/doi/10.1002/14651858.CD009786.pub2/abstract>  
36  
37  
38 t.

39  
40 259. Rydzewska L, Tierney J, Vale Claire L, et al. Neoadjuvant chemotherapy plus surgery  
41  
42 versus surgery for cervical cancer. Cochrane Database of Systematic Reviews  
43  
44 2012; (12).

45  
46 <http://onlinelibrary.wiley.com/doi/10.1002/14651858.CD007406.pub3/abstract>  
47  
48  
49 t.

50  
51  
52 260. Salhofer I, Will A, Monsef I, et al. Meditation for adults with haematological  
53  
54 malignancies. Cochrane Database of Systematic Reviews 2016; (2).

55  
56 <http://onlinelibrary.wiley.com/doi/10.1002/14651858.CD011157.pub2/abstract>  
57  
58  
59 t.

- 1  
2  
3 261. Samuel M, Khin Lay W, Brennan Victoria K, et al. Timing of breast surgery in  
4  
5 premenopausal breast cancer patients. Cochrane Database of Systematic Reviews  
6  
7 2011; (5).  
8  
9  
10 <http://onlinelibrary.wiley.com/doi/10.1002/14651858.CD003720.pub2/abstract>  
11  
12  
13  
14  
15 262. Santos Fábio N, de Castria Tiago B, Cruz Marcelo RS, et al. Chemotherapy for  
16  
17 advanced non-small cell lung cancer in the elderly population. Cochrane Database  
18  
19 of Systematic Reviews 2015; (10).  
20  
21  
22 <http://onlinelibrary.wiley.com/doi/10.1002/14651858.CD010463.pub2/abstract>  
23  
24  
25  
26  
27 263. Sarmiento JM, Venteicher Andrew S, Patil Chirag G. Early versus delayed  
28  
29 postoperative radiotherapy for treatment of low-grade gliomas. Cochrane  
30  
31 Database of Systematic Reviews 2015; (6).  
32  
33  
34 <http://onlinelibrary.wiley.com/doi/10.1002/14651858.CD009229.pub2/abstract>  
35  
36  
37  
38  
39 264. Scatchard K, Forrest Jennifer L, Flubacher M, et al. Chemotherapy for metastatic and  
40  
41 recurrent cervical cancer. Cochrane Database of Systematic Reviews 2012; (10).  
42  
43  
44 <http://onlinelibrary.wiley.com/doi/10.1002/14651858.CD006469.pub2/abstract>  
45  
46  
47  
48 265. Schaaf M, Reiser M, Borchmann P, et al. High-dose therapy with autologous stem  
49  
50 cell transplantation versus chemotherapy or immuno-chemotherapy for follicular  
51  
52 lymphoma in adults. Cochrane Database of Systematic Reviews 2012; (1).  
53  
54  
55 <http://onlinelibrary.wiley.com/doi/10.1002/14651858.CD007678.pub2/abstract>  
56  
57  
58  
59  
60

- 1  
2  
3 266. Schlaak M, Pickenhain J, Theurich S, et al. Allogeneic stem cell transplantation  
4  
5 versus conventional therapy for advanced primary cutaneous T-cell lymphoma.  
6  
7 Cochrane Database of Systematic Reviews 2013; (8).  
8  
9 <http://onlinelibrary.wiley.com/doi/10.1002/14651858.CD008908.pub3/abstract>  
10  
11  
12  
13  
14  
15 267. Schmidt-Hansen M, Baldwin David R, Hasler E, et al. PET-CT for assessing  
16  
17 mediastinal lymph node involvement in patients with suspected resectable non-  
18  
19 small cell lung cancer. Cochrane Database of Systematic Reviews 2014; (11).  
20  
21 <http://onlinelibrary.wiley.com/doi/10.1002/14651858.CD009519.pub2/abstract>  
22  
23  
24  
25  
26  
27 268. Schmidt-Hansen M, Bennett Michael I, Arnold S, et al. Oxycodone for cancer-related  
28  
29 pain. Cochrane Database of Systematic Reviews 2015; (2).  
30  
31 <http://onlinelibrary.wiley.com/doi/10.1002/14651858.CD003870.pub5/abstract>  
32  
33  
34  
35  
36 269. Schmidt-Hansen M, Bromham N, Taubert M, et al. Buprenorphine for treating  
37  
38 cancer pain. Cochrane Database of Systematic Reviews 2015; (3).  
39  
40 <http://onlinelibrary.wiley.com/doi/10.1002/14651858.CD009596.pub4/abstract>  
41  
42  
43  
44  
45 270. Schoot Reineke A, Kremer Leontien CM, van de Wetering Marianne D, et al.  
46  
47 Systemic treatments for the prevention of venous thrombo-embolic events in  
48  
49 paediatric cancer patients with tunnelled central venous catheters. Cochrane  
50  
51 Database of Systematic Reviews 2013; (9).  
52  
53 <http://onlinelibrary.wiley.com/doi/10.1002/14651858.CD009160.pub2/abstract>  
54  
55  
56  
57  
58  
59  
60

- 1  
2  
3 271. Schoot Reineke A, van Dalen Elvira C, van Ommen Cornelia H, et al. Antibiotic and  
4  
5 other lock treatments for tunnelled central venous catheter-related infections in  
6  
7 children with cancer. Cochrane Database of Systematic Reviews 2013; (6).  
8  
9 <http://onlinelibrary.wiley.com/doi/10.1002/14651858.CD008975.pub2/abstract>  
10  
11  
12  
13  
14  
15 272. Scott David A, Mills M, Black A, et al. Multidimensional rehabilitation programmes  
16  
17 for adult cancer survivors. Cochrane Database of Systematic Reviews 2013; (3).  
18  
19 <http://onlinelibrary.wiley.com/doi/10.1002/14651858.CD007730.pub2/abstract>  
20  
21  
22  
23  
24 273. Scott K, Hayden Patrick J, Will A, et al. Bortezomib for the treatment of multiple  
25  
26 myeloma. Cochrane Database of Systematic Reviews 2016; (4).  
27  
28 <http://onlinelibrary.wiley.com/doi/10.1002/14651858.CD010816.pub2/abstract>  
29  
30  
31  
32  
33 274. Semple C, Parahoo K, Norman A, et al. Psychosocial interventions for patients with  
34  
35 head and neck cancer. Cochrane Database of Systematic Reviews 2013; (7).  
36  
37 <http://onlinelibrary.wiley.com/doi/10.1002/14651858.CD009441.pub2/abstract>  
38  
39  
40  
41  
42  
43 275. Shang Pan F, Kwong J, Wang Zhi P, et al. Intravesical Bacillus Calmette-Guérin  
44  
45 versus epirubicin for Ta and T1 bladder cancer. Cochrane Database of Systematic  
46  
47 Reviews 2011; (5).  
48  
49 <http://onlinelibrary.wiley.com/doi/10.1002/14651858.CD006885.pub2/abstract>  
50  
51  
52  
53  
54 276. Sharif Fyeza NJ, Oliver R, Sweet C, et al. Interventions for the treatment of  
55  
56 keratocystic odontogenic tumours. Cochrane Database of Systematic Reviews  
57  
58 2015; (11).  
59  
60

1  
2  
3 <http://onlinelibrary.wiley.com/doi/10.1002/14651858.CD008464.pub3/abstract>  
4  
5  
6 t.

7  
8 277. Shelley M, Cleves A, Wilt Timothy J, et al. Gemcitabine for unresectable, locally  
9  
10 advanced or metastatic bladder cancer. Cochrane Database of Systematic  
11  
12 Reviews 2011; (4).

13  
14 <http://onlinelibrary.wiley.com/doi/10.1002/14651858.CD008976.pub2/abstract>  
15  
16  
17 t.

18  
19 278. Shepherd Jonathan P, Frampton Geoff K, Harris P. Interventions for encouraging  
20  
21 sexual behaviours intended to prevent cervical cancer. Cochrane Database of  
22  
23 Systematic Reviews 2011; (4).

24  
25 <http://onlinelibrary.wiley.com/doi/10.1002/14651858.CD001035.pub2/abstract>  
26  
27  
28 t.

29  
30 279. Shylasree TS, Bryant A, Athavale R. Chemotherapy and/or radiotherapy in  
31  
32 combination with surgery for ovarian carcinosarcoma. Cochrane Database of  
33  
34 Systematic Reviews 2013; (2).

35  
36 <http://onlinelibrary.wiley.com/doi/10.1002/14651858.CD006246.pub2/abstract>  
37  
38  
39 t.

40  
41 280. Shylasree TS, Bryant A, Howells Robert EJ. Chemoradiation for advanced primary  
42  
43 vulval cancer. Cochrane Database of Systematic Reviews 2011; (4).

44  
45 <http://onlinelibrary.wiley.com/doi/10.1002/14651858.CD003752.pub3/abstract>  
46  
47  
48 t.

49  
50 281. Sickinger M-T, von Tresckow B, Kobe C, et al. Positron emission tomography-  
51  
52 adapted therapy for first-line treatment in individuals with Hodgkin lymphoma.  
53  
54 Cochrane Database of Systematic Reviews 2015; (1).

1  
2  
3 <http://onlinelibrary.wiley.com/doi/10.1002/14651858.CD010533.pub2/abstract>  
4  
5  
6 t.

7  
8 282. Skoetz N, Bauer K, Elter T, et al. Alemtuzumab for patients with chronic  
9  
10 lymphocytic leukaemia. Cochrane Database of Systematic Reviews 2012; (2).

11  
12 <http://onlinelibrary.wiley.com/doi/10.1002/14651858.CD008078.pub2/abstract>  
13  
14  
15 t.

16  
17 283. Skoetz N, Bohlius J, Engert A, et al. Prophylactic antibiotics or G(M)-CSF for the  
18  
19 prevention of infections and improvement of survival in cancer patients receiving  
20  
21 myelotoxic chemotherapy. Cochrane Database of Systematic Reviews 2015; (12).

22  
23 <http://onlinelibrary.wiley.com/doi/10.1002/14651858.CD007107.pub3/abstract>  
24  
25  
26 t.

27  
28  
29 284. Smith Lesley A, Azariah F, Lavender Verna TC, et al. Cannabinoids for nausea and  
30  
31 vomiting in adults with cancer receiving chemotherapy. Cochrane Database of  
32  
33 Systematic Reviews 2015; (11).

34  
35 <http://onlinelibrary.wiley.com/doi/10.1002/14651858.CD009464.pub2/abstract>  
36  
37  
38 t.

39  
40 285. Song H, Zhu J, Lu D. Long-term proton pump inhibitor (PPI) use and the  
41  
42 development of gastric pre-malignant lesions. Cochrane Database of Systematic  
43  
44 Reviews 2014; (12).

45  
46 <http://onlinelibrary.wiley.com/doi/10.1002/14651858.CD010623.pub2/abstract>  
47  
48  
49 t.

50  
51  
52 286. Soon Yu Y, Tham Ivan Weng K, Lim Keith H, et al. Surgery or radiosurgery plus  
53  
54 whole brain radiotherapy versus surgery or radiosurgery alone for brain  
55  
56 metastases. Cochrane Database of Systematic Reviews 2014; (3).

57  
58  
59  
60

1  
2  
3 <http://onlinelibrary.wiley.com/doi/10.1002/14651858.CD009454.pub2/abstract>  
4  
5  
6 t.

7  
8 287. Spanjersberg Willem R, Reurings J, Keus F, et al. Fast track surgery versus  
9  
10 conventional recovery strategies for colorectal surgery. Cochrane Database of  
11  
12 Systematic Reviews 2011; (2).

13  
14 <http://onlinelibrary.wiley.com/doi/10.1002/14651858.CD007635.pub2/abstract>  
15  
16  
17 t.

18  
19 288. Staley H, McCallum I, Bruce J. Postoperative tamoxifen for ductal carcinoma in situ.  
20  
21 Cochrane Database of Systematic Reviews 2012; (10).

22  
23 <http://onlinelibrary.wiley.com/doi/10.1002/14651858.CD007847.pub2/abstract>  
24  
25  
26 t.

27  
28 289. Stevens R, Macbeth F, Toy E, et al. Palliative radiotherapy regimens for patients  
29  
30 with thoracic symptoms from non-small cell lung cancer. Cochrane Database of  
31  
32 Systematic Reviews 2015; (1).

33  
34 <http://onlinelibrary.wiley.com/doi/10.1002/14651858.CD002143.pub4/abstract>  
35  
36  
37 t.

38  
39 290. Straube C, Derry S, Jackson Kenneth C, et al. Codeine, alone and with paracetamol  
40  
41 (acetaminophen), for cancer pain. Cochrane Database of Systematic Reviews  
42  
43 2014; (9).

44  
45 <http://onlinelibrary.wiley.com/doi/10.1002/14651858.CD006601.pub4/abstract>  
46  
47  
48 t.

49  
50 291. Stuver Martijn M, ten Tusscher Marieke R, Agasi-Idenburg Carla S, et al.  
51  
52 Conservative interventions for preventing clinically detectable upper-limb  
53  
54 lymphoedema in patients who are at risk of developing lymphoedema after  
55  
56 breast cancer therapy. Cochrane Database of Systematic Reviews 2015; (2).  
57  
58  
59  
60



1  
2  
3 <http://onlinelibrary.wiley.com/doi/10.1002/14651858.CD009765.pub2/abstract>  
4  
5  
6 t.

7  
8 292. Taefi A, Abrishami A, Nasser-Moghaddam S, et al. Surgical resection versus liver  
9  
10 transplant for patients with hepatocellular carcinoma. Cochrane Database of  
11  
12 Systematic Reviews 2013; (6).

13  
14  
15 <http://onlinelibrary.wiley.com/doi/10.1002/14651858.CD006935.pub2/abstract>  
16  
17  
18 t.

19  
20 293. Tangjitgamol S, Katanyoo K, Laopaiboon M, et al. Adjuvant chemotherapy after  
21  
22 concurrent chemoradiation for locally advanced cervical cancer. Cochrane  
23  
24 Database of Systematic Reviews 2014; (12).

25  
26  
27 <http://onlinelibrary.wiley.com/doi/10.1002/14651858.CD010401.pub2/abstract>  
28  
29  
30 t.

31  
32 294. Theurich S, Fischmann H, Shimabukuro-Vornhagen A, et al. Polyclonal anti-  
33  
34 thymocyte globulins for the prophylaxis of graft-versus-host disease after  
35  
36 allogeneic stem cell or bone marrow transplantation in adults. Cochrane  
37  
38 Database of Systematic Reviews 2012; (9).

39  
40  
41 <http://onlinelibrary.wiley.com/doi/10.1002/14651858.CD009159.pub2/abstract>  
42  
43  
44 t.

45  
46 295. Thomson David R, Sadideen H, Furniss D. Wound drainage after axillary dissection  
47  
48 for carcinoma of the breast. Cochrane Database of Systematic Reviews 2013;  
49  
50 (10).

51  
52  
53 <http://onlinelibrary.wiley.com/doi/10.1002/14651858.CD006823.pub2/abstract>  
54  
55  
56 t.

57  
58 296. Tonia T, Mettler A, Robert N, et al. Erythropoietin or darbepoetin for patients with  
59  
60 cancer. Cochrane Database of Systematic Reviews 2012; (12).

1  
2  
3 <http://onlinelibrary.wiley.com/doi/10.1002/14651858.CD003407.pub5/abstract>  
4  
5  
6 t.

7  
8 297. Torres Maria FS, Porfirio Gustavo JM, Carvalho Alan PV, et al. Non-invasive positive  
9  
10 pressure ventilation for prevention of complications after pulmonary resection in  
11  
12 lung cancer patients. Cochrane Database of Systematic Reviews 2015; (9).

13  
14  
15 <http://onlinelibrary.wiley.com/doi/10.1002/14651858.CD010355.pub2/abstract>  
16  
17  
18 t.

19  
20 298. Tou S, Malik Ali I, Wexner Steven D, et al. Energy source instruments for  
21  
22 laparoscopic colectomy. Cochrane Database of Systematic Reviews 2011; (5).

23  
24 <http://onlinelibrary.wiley.com/doi/10.1002/14651858.CD007886.pub2/abstract>  
25  
26  
27 t.

28  
29 299. Tsao May N, Lloyd N, Wong Rebecca KS, et al. Whole brain radiotherapy for the  
30  
31 treatment of newly diagnosed multiple brain metastases. Cochrane Database of  
32  
33 Systematic Reviews 2012; (4).

34  
35  
36 <http://onlinelibrary.wiley.com/doi/10.1002/14651858.CD003869.pub3/abstract>  
37  
38  
39 t.

40  
41 300. Tzellos T, Kyrgidis A, Mocellin S, et al. Interventions for melanoma in situ, including  
42  
43 lentigo maligna. Cochrane Database of Systematic Reviews 2014; (12).

44  
45 <http://onlinelibrary.wiley.com/doi/10.1002/14651858.CD010308.pub2/abstract>  
46  
47  
48 t.

49  
50 301. Vale Claire L, Tierney J, Bull Sarah J, et al. Chemotherapy for advanced, recurrent or  
51  
52 metastatic endometrial carcinoma. Cochrane Database of Systematic Reviews  
53  
54 2012; (8).

55  
56  
57 <http://onlinelibrary.wiley.com/doi/10.1002/14651858.CD003915.pub4/abstract>  
58  
59  
60 t.

- 1  
2  
3 302. van Dalen Elvira C, Caron Huib N, Dickinson Heather O, et al. Cardioprotective  
4  
5 interventions for cancer patients receiving anthracyclines. Cochrane Database of  
6  
7 Systematic Reviews 2011; (6).  
8  
9 <http://onlinelibrary.wiley.com/doi/10.1002/14651858.CD003917.pub4/abstract>  
10  
11  
12  
13  
14  
15 303. van Dalen Elvira C, de Lijster Manou S, Leijssen Lieve GJ, et al. Minimally invasive  
16  
17 surgery versus open surgery for the treatment of solid abdominal and thoracic  
18  
19 neoplasms in children. Cochrane Database of Systematic Reviews 2015; (1).  
20  
21 <http://onlinelibrary.wiley.com/doi/10.1002/14651858.CD008403.pub3/abstract>  
22  
23  
24  
25  
26  
27 304. van Dalen Elvira C, Mank A, Leclercq E, et al. Low bacterial diet versus control diet  
28  
29 to prevent infection in cancer patients treated with chemotherapy causing  
30  
31 episodes of neutropenia. Cochrane Database of Systematic Reviews 2016; (4).  
32  
33 <http://onlinelibrary.wiley.com/doi/10.1002/14651858.CD006247.pub3/abstract>  
34  
35  
36  
37  
38  
39 305. van Dalen Elvira C, Raphaël Martine F, Caron Huib N, et al. Treatment including  
40  
41 anthracyclines versus treatment not including anthracyclines for childhood  
42  
43 cancer. Cochrane Database of Systematic Reviews 2014; (9).  
44  
45 <http://onlinelibrary.wiley.com/doi/10.1002/14651858.CD006647.pub4/abstract>  
46  
47  
48  
49  
50  
51 306. van Dalen Elvira C, van As Jorrit W, de Camargo B. Methotrexate for high-grade  
52  
53 osteosarcoma in children and young adults. Cochrane Database of Systematic  
54  
55 Reviews 2011; (5).  
56  
57 <http://onlinelibrary.wiley.com/doi/10.1002/14651858.CD006325.pub3/abstract>  
58  
59  
60

- 1  
2  
3 307. van Dalen Elvira C, van der Pal Helena JH, Kremer Leontien CM. Different dosage  
4  
5 schedules for reducing cardiotoxicity in people with cancer receiving  
6  
7 anthracycline chemotherapy. Cochrane Database of Systematic Reviews 2016;  
8  
9 (3).  
10  
11 <http://onlinelibrary.wiley.com/doi/10.1002/14651858.CD005008.pub4/abstract>  
12  
13  
14  
15  
16  
17 308. van de Wetering Fleur T, Verleye L, Andreyev HJN, et al. Non-surgical interventions  
18  
19 for late rectal problems (proctopathy) of radiotherapy in people who have  
20  
21 received radiotherapy to the pelvis. Cochrane Database of Systematic Reviews  
22  
23 2016; (4).  
24  
25 <http://onlinelibrary.wiley.com/doi/10.1002/14651858.CD003455.pub2/abstract>  
26  
27  
28  
29  
30  
31 309. van de Wetering Marianne D, van Woensel Job BM, Lawrie Theresa A. Prophylactic  
32  
33 antibiotics for preventing Gram positive infections associated with long-term  
34  
35 central venous catheters in oncology patients. Cochrane Database of Systematic  
36  
37 Reviews 2013; (11).  
38  
39 <http://onlinelibrary.wiley.com/doi/10.1002/14651858.CD003295.pub3/abstract>  
40  
41  
42  
43  
44  
45 310. van der Heijden E, Lopes Alberto D, Bryant A, et al. Follow-up strategies after  
46  
47 treatment (large loop excision of the transformation zone (LLETZ)) for cervical  
48  
49 intraepithelial neoplasia (CIN): Impact of human papillomavirus (HPV) test.  
50  
51 Cochrane Database of Systematic Reviews 2015; (1).  
52  
53 <http://onlinelibrary.wiley.com/doi/10.1002/14651858.CD010757.pub2/abstract>  
54  
55  
56  
57  
58  
59  
60

- 1  
2  
3 311. van der Velden J, Fons G, Lawrie Theresa A. Primary groin irradiation versus  
4  
5 primary groin surgery for early vulvar cancer. Cochrane Database of Systematic  
6  
7 Reviews 2011; (5).  
8  
9  
10 <http://onlinelibrary.wiley.com/doi/10.1002/14651858.CD002224.pub2/abstract>  
11  
12  
13 t.
- 14  
15 312. Veeravagu A, Chang Steven D, Black Keith L, et al. Biopsy versus resection for the  
16  
17 management of low-grade gliomas. Cochrane Database of Systematic Reviews  
18  
19 2013; (4).  
20  
21  
22 <http://onlinelibrary.wiley.com/doi/10.1002/14651858.CD009319.pub3/abstract>  
23  
24  
25 t.
- 26  
27 313. Vennix S, Pelzers L, Bouvy N, et al. Laparoscopic versus open total mesorectal  
28  
29 excision for rectal cancer. Cochrane Database of Systematic Reviews 2014; (4).  
30  
31  
32 <http://onlinelibrary.wiley.com/doi/10.1002/14651858.CD005200.pub3/abstract>  
33  
34  
35 t.
- 36  
37 314. Vidal L, Ben dor I, Paul M, et al. Oral versus intravenous antibiotic treatment for  
38  
39 febrile neutropenia in cancer patients. Cochrane Database of Systematic Reviews  
40  
41 2013; (10).  
42  
43  
44 <http://onlinelibrary.wiley.com/doi/10.1002/14651858.CD003992.pub3/abstract>  
45  
46  
47 t.
- 48  
49 315. Vidal L, Gafter-Gvili A, Gurion R, et al. Bendamustine for patients with indolent B  
50  
51 cell lymphoid malignancies including chronic lymphocytic leukaemia. Cochrane  
52  
53 Database of Systematic Reviews 2012; (9).  
54  
55  
56 <http://onlinelibrary.wiley.com/doi/10.1002/14651858.CD009045.pub2/abstract>  
57  
58  
59 t.  
60

- 1  
2  
3 316. Vinceti M, Dennert G, Crespi Catherine M, et al. Selenium for preventing cancer.  
4  
5 Cochrane Database of Systematic Reviews 2014; (3).  
6  
7 <http://onlinelibrary.wiley.com/doi/10.1002/14651858.CD005195.pub3/abstract>  
8  
9  
10  
11  
12 317. Wagner Anna D, Thomssen C, Haerting J, et al. Vascular-endothelial-growth-factor  
13  
14 (VEGF) targeting therapies for endocrine refractory or resistant metastatic breast  
15  
16 cancer. Cochrane Database of Systematic Reviews 2012; (7).  
17  
18 <http://onlinelibrary.wiley.com/doi/10.1002/14651858.CD008941.pub2/abstract>  
19  
20  
21  
22  
23  
24 318. Walsh T, Liu Joseph LY, Brocklehurst P, et al. Clinical assessment to screen for the  
25  
26 detection of oral cavity cancer and potentially malignant disorders in apparently  
27  
28 healthy adults. Cochrane Database of Systematic Reviews 2013; (11).  
29  
30  
31 <http://onlinelibrary.wiley.com/doi/10.1002/14651858.CD010173.pub2/abstract>  
32  
33  
34  
35  
36 319. Wang Z, Chen J, Su K, et al. Abdominal drainage versus no drainage post-  
37  
38 gastrectomy for gastric cancer. Cochrane Database of Systematic Reviews 2015;  
39  
40 (5).  
41  
42 <http://onlinelibrary.wiley.com/doi/10.1002/14651858.CD008788.pub3/abstract>  
43  
44  
45  
46  
47  
48 320. Ward Evelyn J, Henry Lisa M, Friend Amanda J, et al. Nutritional support in children  
49  
50 and young people with cancer undergoing chemotherapy. Cochrane Database of  
51  
52 Systematic Reviews 2015; (8).  
53  
54 <http://onlinelibrary.wiley.com/doi/10.1002/14651858.CD003298.pub3/abstract>  
55  
56  
57  
58  
59  
60

- 1  
2  
3 321. Warner L, Chudasama J, Kelly Charles G, et al. Radiotherapy versus open surgery  
4  
5 versus endolaryngeal surgery (with or without laser) for early laryngeal  
6  
7 squamous cell cancer. Cochrane Database of Systematic Reviews 2014; (12).  
8  
9 <http://onlinelibrary.wiley.com/doi/10.1002/14651858.CD002027.pub2/abstract>  
10  
11  
12  
13 t.
- 14  
15 322. Weberschock T, Strametz R, Lorenz M, et al. Interventions for mycosis fungoides.  
16  
17 Cochrane Database of Systematic Reviews 2012; (9).  
18  
19 <http://onlinelibrary.wiley.com/doi/10.1002/14651858.CD008946.pub2/abstract>  
20  
21  
22  
23 t.
- 24  
25 323. Wei Mao L, Kang D, Gu L, et al. Chemotherapy for thymic carcinoma and advanced  
26  
27 thymoma in adults. Cochrane Database of Systematic Reviews 2013; (8).  
28  
29 <http://onlinelibrary.wiley.com/doi/10.1002/14651858.CD008588.pub2/abstract>  
30  
31  
32  
33 t.
- 34  
35 324. Weis S, Franke A, Berg T, et al. Percutaneous ethanol injection or percutaneous  
36  
37 acetic acid injection for early hepatocellular carcinoma. Cochrane Database of  
38  
39 Systematic Reviews 2015; (1).  
40  
41 <http://onlinelibrary.wiley.com/doi/10.1002/14651858.CD006745.pub3/abstract>  
42  
43  
44  
45 t.
- 46  
47 325. Weis S, Franke A, Mössner J, et al. Radiofrequency (thermal) ablation versus no  
48  
49 intervention or other interventions for hepatocellular carcinoma. Cochrane  
50  
51 Database of Systematic Reviews 2013; (12).  
52  
53 <http://onlinelibrary.wiley.com/doi/10.1002/14651858.CD003046.pub3/abstract>  
54  
55  
56  
57 t.
- 58  
59 326. Weitz M, Strahm B, Meerpohl Joerg J, et al. Extracorporeal photopheresis versus  
60  
61 alternative treatment for chronic graft-versus-host disease after haematopoietic

1  
2  
3 stem cell transplantation in paediatric patients. Cochrane Database of Systematic  
4  
5 Reviews 2015; (12).

6  
7 <http://onlinelibrary.wiley.com/doi/10.1002/14651858.CD009898.pub3/abstract>  
8  
9  
10 t.

11  
12 327. Weitz M, Strahm B, Meerpohl Joerg J, et al. Extracorporeal photopheresis versus  
13  
14 standard treatment for acute graft-versus-host disease after haematopoietic stem  
15  
16 cell transplantation in paediatric patients. Cochrane Database of Systematic  
17  
18 Reviews 2015; (12).

19  
20  
21 <http://onlinelibrary.wiley.com/doi/10.1002/14651858.CD009759.pub3/abstract>  
22  
23  
24 t.

25  
26 328. Wiffen Philip J, Derry S, Moore RA. Impact of morphine, fentanyl, oxycodone or  
27  
28 codeine on patient consciousness, appetite and thirst when used to treat cancer  
29  
30 pain. Cochrane Database of Systematic Reviews 2014; (5).

31  
32  
33 <http://onlinelibrary.wiley.com/doi/10.1002/14651858.CD011056.pub2/abstract>  
34  
35  
36 t.

37  
38 329. Wiffen Philip J, Derry S, Naessens K, et al. Oral tapentadol for cancer pain. Cochrane  
39  
40 Database of Systematic Reviews 2015; (9).

41  
42  
43 <http://onlinelibrary.wiley.com/doi/10.1002/14651858.CD011460.pub2/abstract>  
44  
45  
46 t.

47  
48 330. Wiffen Philip J, Wee B, Moore RA. Oral morphine for cancer pain. Cochrane  
49  
50 Database of Systematic Reviews 2016; (4).

51  
52  
53 <http://onlinelibrary.wiley.com/doi/10.1002/14651858.CD003868.pub4/abstract>  
54  
55  
56 t.

57  
58 331. Wiggins Alison J, Cass Gemma KS, Bryant A, et al. Poly(ADP-ribose) polymerase  
59  
60 (PARP) inhibitors for the treatment of ovarian cancer. Cochrane Database of



1  
2  
3 Systematic Reviews 2015; (5).

4 <http://onlinelibrary.wiley.com/doi/10.1002/14651858.CD007929.pub3/abstract>  
5  
6  
7  
8 t.

9  
10 332. Williams C, Bryant A. Short versus long duration infusions of paclitaxel for any  
11  
12 advanced adenocarcinoma. Cochrane Database of Systematic Reviews 2011; (5).

13 <http://onlinelibrary.wiley.com/doi/10.1002/14651858.CD003911.pub2/abstract>  
14  
15  
16  
17 t.

18  
19 333. Wolf E, Milazzo S, Boehm K, et al. Thymic peptides for treatment of cancer patients.  
20  
21 Cochrane Database of Systematic Reviews 2011; (2).

22 <http://onlinelibrary.wiley.com/doi/10.1002/14651858.CD003993.pub3/abstract>  
23  
24  
25  
26 t.

27  
28  
29 334. Wong Matthew HF, Stockler Martin R, Pavlakis N. Bisphosphonates and other bone  
30  
31 agents for breast cancer. Cochrane Database of Systematic Reviews 2012; (2).

32 <http://onlinelibrary.wiley.com/doi/10.1002/14651858.CD003474.pub3/abstract>  
33  
34  
35  
36 t.

37  
38 335. Woo Yin L, Kyrgiou M, Bryant A, et al. Centralisation of services for gynaecological  
39  
40 cancer. Cochrane Database of Systematic Reviews 2012; (3).

41 <http://onlinelibrary.wiley.com/doi/10.1002/14651858.CD007945.pub2/abstract>  
42  
43  
44  
45 t.

46  
47 336. Worthington Helen V, Clarkson Jan E, Bryan G, et al. Interventions for preventing  
48  
49 oral mucositis for patients with cancer receiving treatment. Cochrane Database of  
50  
51 Systematic Reviews 2011; (4).

52 <http://onlinelibrary.wiley.com/doi/10.1002/14651858.CD000978.pub5/abstract>  
53  
54  
55  
56  
57 t.

- 1  
2  
3 337. Wulaningsih W, Wardhana A, Watkins J, et al. Irinotecan chemotherapy combined  
4  
5 with fluoropyrimidines versus irinotecan alone for overall survival and  
6  
7 progression-free survival in patients with advanced and/or metastatic colorectal  
8  
9 cancer. Cochrane Database of Systematic Reviews 2016; (2).  
10  
11 <http://onlinelibrary.wiley.com/doi/10.1002/14651858.CD008593.pub3/abstract>  
12  
13  
14  
15 t.
- 16  
17 338. Yalçın B, Kremer Leontien CM, van Dalen Elvira C. High-dose chemotherapy and  
18  
19 autologous haematopoietic stem cell rescue for children with high-risk  
20  
21 neuroblastoma. Cochrane Database of Systematic Reviews 2015; (10).  
22  
23 <http://onlinelibrary.wiley.com/doi/10.1002/14651858.CD006301.pub4/abstract>  
24  
25  
26  
27 t.
- 28  
29 339. Yang J, Zhu L, Wu Z, et al. Chinese herbal medicines for induction of remission in  
30  
31 advanced or late gastric cancer. Cochrane Database of Systematic Reviews 2013;  
32  
33 (4).  
34  
35 <http://onlinelibrary.wiley.com/doi/10.1002/14651858.CD005096.pub4/abstract>  
36  
37  
38  
39 t.
- 40  
41 340. Yang S, Wu S, Huang Y, et al. Screening for oesophageal cancer. Cochrane Database  
42  
43 of Systematic Reviews 2012; (12).  
44  
45 <http://onlinelibrary.wiley.com/doi/10.1002/14651858.CD007883.pub2/abstract>  
46  
47  
48  
49 t.
- 50  
51 341. Yang S, Wu S, Zhou J, et al. Screening for nasopharyngeal cancer. Cochrane Database  
52  
53 of Systematic Reviews 2015; (11).  
54  
55 <http://onlinelibrary.wiley.com/doi/10.1002/14651858.CD008423.pub2/abstract>  
56  
57  
58  
59  
60 t.

- 1  
2  
3 342. Yang Z-Y, Liu L, Mao C, et al. Chemotherapy with cetuximab versus chemotherapy  
4 alone for chemotherapy-naive advanced non-small cell lung cancer. Cochrane  
5 Database of Systematic Reviews 2014; (11).  
6  
7  
8  
9  
10 <http://onlinelibrary.wiley.com/doi/10.1002/14651858.CD009948.pub2/abstract>  
11  
12  
13  
14  
15 343. Yuan Y, Zeng X, Hu Y, et al. Omentoplasty for oesophagostomy after  
16 oesophagectomy. Cochrane Database of Systematic Reviews 2014; (10).  
17  
18  
19 <http://onlinelibrary.wiley.com/doi/10.1002/14651858.CD008446.pub3/abstract>  
20  
21  
22  
23  
24 344. Zacher J, Kasenda B, Engert A, et al. The role of additional radiotherapy for primary  
25 central nervous system lymphoma. Cochrane Database of Systematic Reviews  
26 2014; (6).  
27  
28  
29  
30  
31 <http://onlinelibrary.wiley.com/doi/10.1002/14651858.CD009211.pub2/abstract>  
32  
33  
34  
35  
36 345. Zani Emerson L, Clark Otavio Augusto C, Rodrigues Netto Jr N. Antibiotic  
37 prophylaxis for transrectal prostate biopsy. Cochrane Database of Systematic  
38 Reviews 2011; (5).  
39  
40  
41  
42 <http://onlinelibrary.wiley.com/doi/10.1002/14651858.CD006576.pub2/abstract>  
43  
44  
45  
46  
47  
48 346. Zhong Jian H, Li Le Q, Wu Liu C. Lamivudine with or without adefovir  
49 dipivoxil for postoperative hepatocellular carcinoma. Cochrane Database of  
50 Systematic Reviews 2011; (12).  
51 <http://onlinelibrary.wiley.com/doi/10.1002/14651858.CD008713.pub2/abstract>  
52  
53  
54  
55

56 *High impact journal SRs*  
57  
58  
59  
60

- 1  
2  
3 1. Menarche, menopause, and breast cancer risk: individual participant meta-analysis,  
4 including 118 964 women with breast cancer from 117 epidemiological studies. The  
5  
6 Lancet Oncology 2012;13(11):1141-51.  
7  
8  
9
- 10  
11 2. Preoperative chemotherapy for non-small-cell lung cancer: a systematic review and  
12  
13 meta-analysis of individual participant data. Lancet (London, England)  
14  
15 2014;383(9928):1561-71.  
16  
17
- 18  
19 3. Endometrial cancer and oral contraceptives: an individual participant meta-analysis  
20  
21 of 27 276 women with endometrial cancer from 36 epidemiological studies. The Lancet  
22  
23 Oncology 2015;16(9):1061-70.  
24  
25
- 26  
27 4. Ahmed M, Purushotham AD, Douek M. Novel techniques for sentinel lymph node  
28  
29 biopsy in breast cancer: a systematic review. The Lancet Oncology 2014;15(8):e351-62.  
30  
31
- 32  
33 5. Al Khabori M, de Almeida JR, Guyatt GH, et al. Autologous stem cell transplantation in  
34  
35 follicular lymphoma: a systematic review and meta-analysis. Journal of the National  
36  
37 Cancer Institute 2012;104(1):18-28.  
38  
39
- 40  
41 6. Algra AM, Rothwell PM. Effects of regular aspirin on long-term cancer incidence and  
42  
43 metastasis: a systematic comparison of evidence from observational studies versus  
44  
45 randomised trials. The Lancet Oncology 2012;13(5):518-27.  
46  
47
- 48  
49 7. Amir E, Seruga B, Niraula S, et al. Toxicity of adjuvant endocrine therapy in  
50  
51 postmenopausal breast cancer patients: a systematic review and meta-analysis. Journal  
52  
53 of the National Cancer Institute 2011;103(17):1299-309.  
54  
55  
56  
57  
58  
59  
60

- 1  
2  
3 8. Arbyn M, Verdoodt F, Snijders PJ, et al. Accuracy of human papillomavirus testing on  
4 self-collected versus clinician-collected samples: a meta-analysis. *The Lancet Oncology*  
5  
6 2014;15(2):172-83.  
7  
8  
9
- 10  
11 9. Aune D, Chan DS, Lau R, et al. Dietary fibre, whole grains, and risk of colorectal cancer:  
12 systematic review and dose-response meta-analysis of prospective studies. *BMJ (Clinical*  
13  
14 research ed) 2011;343:d6617.  
15  
16  
17
- 18  
19 10. Bach, Smith-Bindman R, Wood DE, et al. Benefits and harms of CT screening for lung  
20 cancer: a systematic review. *Jama* 2012;307(22):2418-29.  
21  
22  
23
- 24  
25 11. Baldwin C, Spiro A, Ahern R, et al. Oral nutritional interventions in malnourished  
26 patients with cancer: a systematic review and meta-analysis. *Journal of the National*  
27  
28 Cancer Institute 2012;104(5):371-85.  
29  
30  
31
- 32  
33 12. Ballard-Barbash R, Friedenreich CM, Courneya KS, et al. Physical activity,  
34 biomarkers, and disease outcomes in cancer survivors: a systematic review. *Journal of*  
35  
36 the National Cancer Institute 2012;104(11):815-40.  
37  
38  
39
- 40  
41 13. Bangalore S, Kumar S, Kjeldsen SE, et al. Antihypertensive drugs and risk of cancer:  
42 network meta-analyses and trial sequential analyses of 324,168 participants from  
43  
44 randomised trials. *The Lancet Oncology* 2011;12(1):65-82.  
45  
46  
47
- 48  
49 14. Bao Y, Michaud DS, Spiegelman D, et al. Folate intake and risk of pancreatic cancer:  
50 pooled analysis of prospective cohort studies. *Journal of the National Cancer Institute*  
51  
52 2011;103(24):1840-50.  
53  
54  
55  
56  
57  
58  
59  
60

- 1  
2  
3 15. Beral V, Gaitskell K, Hermon C, et al. Ovarian cancer and smoking: individual  
4 participant meta-analysis including 28,114 women with ovarian cancer from 51  
5 epidemiological studies. *The Lancet Oncology* 2012;13(9):946-56.  
6  
7  
8  
9  
10  
11 16. Beral V, Gaitskell K, Hermon C, et al. Menopausal hormone use and ovarian cancer  
12 risk: individual participant meta-analysis of 52 epidemiological studies. *Lancet (London,*  
13 *England)* 2015;385(9980):1835-42.  
14  
15  
16  
17  
18  
19 17. Biagi JJ, Raphael MJ, Mackillop WJ, et al. Association between time to initiation of  
20 adjuvant chemotherapy and survival in colorectal cancer: a systematic review and meta-  
21 analysis. *Jama* 2011;305(22):2335-42.  
22  
23  
24  
25  
26  
27 18. Blanchard P, Bourhis J, Lacas B, et al. Taxane-cisplatin-fluorouracil as induction  
28 chemotherapy in locally advanced head and neck cancers: an individual patient data  
29 meta-analysis of the meta-analysis of chemotherapy in head and neck cancer group.  
30 *Journal of clinical oncology : official journal of the American Society of Clinical Oncology*  
31 2013;31(23):2854-60.  
32  
33  
34  
35  
36  
37  
38  
39  
40 19. Blanchard P, Lee A, Marguet S, et al. Chemotherapy and radiotherapy in  
41 nasopharyngeal carcinoma: an update of the MAC-NPC meta-analysis. *The Lancet*  
42 *Oncology* 2015;16(6):645-55.  
43  
44  
45  
46  
47  
48 20. Blanke CD, Bot BM, Thomas DM, et al. Impact of young age on treatment efficacy and  
49 safety in advanced colorectal cancer: a pooled analysis of patients from nine first-line  
50 phase III chemotherapy trials. *Journal of clinical oncology : official journal of the*  
51 *American Society of Clinical Oncology* 2011;29(20):2781-6.  
52  
53  
54  
55  
56  
57  
58 21. Blumenthal GM, Karuri SW, Zhang H, et al. Overall response rate, progression-free  
59 survival, and overall survival with targeted and standard therapies in advanced non-  
60

1  
2  
3 small-cell lung cancer: US Food and Drug Administration trial-level and patient-level  
4 analyses. *Journal of clinical oncology : official journal of the American Society of Clinical*  
5  
6  
7  
8 *Oncology* 2015;33(9):1008-14.  
9

10  
11 22. Boehmer U, Cooley TP, Clark MA. Cancer and men who have sex with men: a  
12  
13  
14  
15  
16  
17  
18  
19  
20  
21  
22  
23  
24  
25  
26  
27  
28  
29  
30  
31  
32  
33  
34  
35  
36  
37  
38  
39  
40  
41  
42  
43  
44  
45  
46  
47  
48  
49  
50  
51  
52  
53  
54  
55  
56  
57  
58  
59  
60

systematic review. *The Lancet Oncology* 2012;13(12):e545-53.

23. Bolton KL, Chenevix-Trench G, Goh C, et al. Association between BRCA1 and BRCA2  
mutations and survival in women with invasive epithelial ovarian cancer. *Jama*  
2012;307(4):382-90.

24. Boniol M, Autier P, Boyle P, et al. Cutaneous melanoma attributable to sunbed use:  
systematic review and meta-analysis. *BMJ (Clinical research ed)* 2012;345:e4757.

25. Bourhis J, Blanchard P, Maillard E, et al. Effect of amifostine on survival among  
patients treated with radiotherapy: a meta-analysis of individual patient data. *Journal of*  
*clinical oncology : official journal of the American Society of Clinical Oncology*  
2011;29(18):2590-7.

26. Bowers DC, Nathan PC, Constine L, et al. Subsequent neoplasms of the CNS among  
survivors of childhood cancer: a systematic review. *The Lancet Oncology*  
2013;14(8):e321-8.

27. Boyle T, Keegel T, Bull F, et al. Physical activity and risks of proximal and distal colon  
cancers: a systematic review and meta-analysis. *Journal of the National Cancer Institute*  
2012;104(20):1548-61.

- 1  
2  
3 28. Brasme JF, Morfouace M, Grill J, et al. Delays in diagnosis of paediatric cancers: a  
4 systematic review and comparison with expert testimony in lawsuits. *The Lancet*  
5  
6  
7  
8 *Oncology* 2012;13(10):e445-59.  
9  
10  
11 29. Brenner H, Stock C, Hoffmeister M. Effect of screening sigmoidoscopy and screening  
12  
13  
14  
15  
16  
17  
18  
19  
20  
21  
22 30. Breugom AJ, Swets M, Bosset JF, et al. Adjuvant chemotherapy after preoperative  
23  
24  
25  
26  
27  
28  
29  
30  
31  
32  
33  
34  
35  
36  
37  
38  
39  
40  
41  
42  
43  
44  
45  
46  
47  
48  
49  
50  
51  
52  
53  
54  
55  
56  
57  
58  
59  
60
30. Breugom AJ, Swets M, Bosset JF, et al. Adjuvant chemotherapy after preoperative (chemo)radiotherapy and surgery for patients with rectal cancer: a systematic review and meta-analysis of individual patient data. *The Lancet Oncology* 2015;16(2):200-7.
31. Brinton LA, Cook MB, McCormack V, et al. Anthropometric and hormonal risk factors for male breast cancer: male breast cancer pooling project results. *Journal of the National Cancer Institute* 2014;106(3):djt465.
32. Castellsague X, Diaz M, Vaccarella S, et al. Intrauterine device use, cervical infection with human papillomavirus, and risk of cervical cancer: a pooled analysis of 26 epidemiological studies. *The Lancet Oncology* 2011;12(11):1023-31.
33. Castillo JJ, Dalia S, Shum H. Meta-analysis of the association between cigarette smoking and incidence of Hodgkin's Lymphoma. *Journal of clinical oncology : official journal of the American Society of Clinical Oncology* 2011;29(29):3900-6.
34. Chatzinasiou F, Lill CM, Kypreou K, et al. Comprehensive field synopsis and systematic meta-analyses of genetic association studies in cutaneous melanoma. *Journal of the National Cancer Institute* 2011;103(16):1227-35.



- 1  
2  
3 35. Chellapandian D, Lehrnbecher T, Phillips B, et al. Bronchoalveolar lavage and lung  
4 biopsy in patients with cancer and hematopoietic stem-cell transplantation recipients: a  
5 systematic review and meta-analysis. *Journal of clinical oncology : official journal of the*  
6  
7  
8  
9  
10 American Society of Clinical Oncology 2015;33(5):501-9.  
11  
12  
13 36. Chen LS, Hung RJ, Baker T, et al. CHRNA5 risk variant predicts delayed smoking  
14 cessation and earlier lung cancer diagnosis--a meta-analysis. *Journal of the National*  
15  
16  
17  
18  
19  
20  
21  
22 37. Choueiri TK, Mayer EL, Je Y, et al. Congestive heart failure risk in patients with breast  
23 cancer treated with bevacizumab. *Journal of clinical oncology : official journal of the*  
24  
25  
26  
27  
28  
29  
30  
31  
32  
33  
34  
35  
36  
37  
38  
39  
40  
41  
42  
43  
44  
45  
46  
47  
48  
49  
50  
51  
52  
53  
54  
55  
56  
57  
58  
59  
60  
60 38. Chowdhury R, Kunutsor S, Vitezova A, et al. Vitamin D and risk of cause specific  
death: systematic review and meta-analysis of observational cohort and randomised  
intervention studies. *BMJ (Clinical research ed)* 2014;348:g1903.
39. Church DN, Stelloo E, Nout RA, et al. Prognostic significance of POLE proofreading  
mutations in endometrial cancer. *Journal of the National Cancer Institute*  
2015;107(1):402.
40. Coleman R, Powles T, Paterson A, et al. Adjuvant bisphosphonate treatment in early  
breast cancer: meta-analyses of individual patient data from randomised trials. *Lancet*  
(London, England) 2015;386(10001):1353-61.
41. Collins M, Wilhelm M, Conyers R, et al. Benefits and adverse events in younger versus  
older patients receiving neoadjuvant chemotherapy for osteosarcoma: findings from a  
meta-analysis. *Journal of clinical oncology : official journal of the American Society of*  
*Clinical Oncology* 2013;31(18):2303-12.

- 1  
2  
3 42. Coory M, White VM, Johnson KS, et al. Systematic review of quality improvement  
4  
5 interventions directed at cancer specialists. *Journal of clinical oncology : official journal*  
6  
7 *of the American Society of Clinical Oncology* 2013;31(12):1583-91.  
8  
9  
10  
11 43. Cortazar P, Zhang L, Untch M, et al. Pathological complete response and long-term  
12  
13 clinical benefit in breast cancer: the CTNeoBC pooled analysis. *Lancet (London, England)*  
14  
15 2014;384(9938):164-72.  
16  
17  
18  
19 44. Crowe FL, Appleby PN, Travis RC, et al. Circulating fatty acids and prostate cancer  
20  
21 risk: individual participant meta-analysis of prospective studies. *Journal of the National*  
22  
23 *Cancer Institute* 2014;106(9).  
24  
25  
26  
27 45. Cuzick J, Sestak I, Bonanni B, et al. Selective oestrogen receptor modulators in  
28  
29 prevention of breast cancer: an updated meta-analysis of individual participant data.  
30  
31 *Lancet (London, England)* 2013;381(9880):1827-34.  
32  
33  
34  
35 46. Dabestani S, Marconi L, Hofmann F, et al. Local treatments for metastases of renal  
36  
37 cell carcinoma: a systematic review. *The Lancet Oncology* 2014;15(12):e549-61.  
38  
39  
40  
41 47. D'Amico AV, Chen MH, de Castro M, et al. Surrogate endpoints for prostate cancer-  
42  
43 specific mortality after radiotherapy and androgen suppression therapy in men with  
44  
45 localised or locally advanced prostate cancer: an analysis of two randomised trials. *The*  
46  
47 *Lancet Oncology* 2012;13(2):189-95.  
48  
49  
50  
51 48. Darby S, McGale P, Correa C, et al. Effect of radiotherapy after breast-conserving  
52  
53 surgery on 10-year recurrence and 15-year breast cancer death: meta-analysis of  
54  
55 individual patient data for 10,801 women in 17 randomised trials. *Lancet (London,*  
56  
57 *England)* 2011;378(9804):1707-16.  
58  
59  
60

- 1  
2  
3 49. Davies C, Godwin J, Gray R, et al. Relevance of breast cancer hormone receptors and  
4  
5 other factors to the efficacy of adjuvant tamoxifen: patient-level meta-analysis of  
6  
7 randomised trials. *Lancet (London, England)* 2011;378(9793):771-84.  
8  
9  
10  
11 50. de Jong MC, Kors WA, de Graaf P, et al. Trilateral retinoblastoma: a systematic review  
12  
13 and meta-analysis. *The Lancet Oncology* 2014;15(10):1157-67.  
14  
15  
16  
17 51. De Witt Hamer PC, Robles SG, Zwinderman AH, et al. Impact of intraoperative  
18  
19 stimulation brain mapping on glioma surgery outcome: a meta-analysis. *Journal of*  
20  
21 *clinical oncology : official journal of the American Society of Clinical Oncology*  
22  
23 2012;30(20):2559-65.  
24  
25  
26  
27 52. Deppen SA, Blume JD, Kensinger CD, et al. Accuracy of FDG-PET to diagnose lung  
28  
29 cancer in areas with infectious lung disease: a meta-analysis. *Jama* 2014;312(12):1227-  
30  
31 36.  
32  
33  
34  
35 53. Di Leo A, Desmedt C, Bartlett JM, et al. HER2 and TOP2A as predictive markers for  
36  
37 anthracycline-containing chemotherapy regimens as adjuvant treatment of breast  
38  
39 cancer: a meta-analysis of individual patient data. *The Lancet Oncology*  
40  
41 2011;12(12):1134-42.  
42  
43  
44  
45 54. DiSipio T, Rye S, Newman B, et al. Incidence of unilateral arm lymphoedema after  
46  
47 breast cancer: a systematic review and meta-analysis. *The Lancet Oncology*  
48  
49 2013;14(6):500-15.  
50  
51  
52  
53 55. dos Santos LV, Souza FH, Brunetto AT, et al. Neurokinin-1 receptor antagonists for  
54  
55 chemotherapy-induced nausea and vomiting: a systematic review. *Journal of the*  
56  
57 *National Cancer Institute* 2012;104(17):1280-92.  
58  
59  
60

- 1  
2  
3 56. Dowsett M, Forbes JF, Bradley R, et al. Aromatase inhibitors versus tamoxifen in  
4 early breast cancer: patient-level meta-analysis of the randomised trials. *Lancet*  
5  
6 (London, England) 2015;386(10001):1341-52.  
7  
8  
9  
10  
11 57. Eisen T, Sternberg CN, Robert C, et al. Targeted therapies for renal cell carcinoma:  
12 review of adverse event management strategies. *Journal of the National Cancer Institute*  
13  
14 2012;104(2):93-113.  
15  
16  
17  
18  
19 58. Eliassen AH, Hendrickson SJ, Brinton LA, et al. Circulating carotenoids and risk of  
20 breast cancer: pooled analysis of eight prospective studies. *Journal of the National*  
21  
22 *Cancer Institute* 2012;104(24):1905-16.  
23  
24  
25  
26  
27 59. Engelhardt EG, Garvelink MM, de Haes JH, et al. Predicting and communicating the  
28 risk of recurrence and death in women with early-stage breast cancer: a systematic  
29 review of risk prediction models. *Journal of clinical oncology : official journal of the*  
30  
31 *American Society of Clinical Oncology* 2014;32(3):238-50. doi:  
32  
33 10.1200/jco.2013.50.3417  
34  
35  
36  
37  
38  
39  
40 60. Faller H, Schuler M, Richard M, et al. Effects of psycho-oncologic interventions on  
41 emotional distress and quality of life in adult patients with cancer: systematic review  
42 and meta-analysis. *Journal of clinical oncology : official journal of the American Society*  
43  
44 *of Clinical Oncology* 2013;31(6):782-93.  
45  
46  
47  
48  
49  
50 61. Fokom-Domgue J, Combescure C, Fokom-Defo V, et al. Performance of alternative  
51 strategies for primary cervical cancer screening in sub-Saharan Africa: systematic  
52 review and meta-analysis of diagnostic test accuracy studies. *BMJ (Clinical research ed)*  
53  
54 2015;351:h3084.  
55  
56  
57  
58  
59  
60

1  
2  
3 62. Fong DY, Ho JW, Hui BP, et al. Physical activity for cancer survivors: meta-analysis of  
4  
5 randomised controlled trials. *BMJ (Clinical research ed)* 2012;344:e70.  
6  
7

8  
9 63. Ford AC, Forman D, Hunt RH, et al. Helicobacter pylori eradication therapy to  
10  
11 prevent gastric cancer in healthy asymptomatic infected individuals: systematic review  
12  
13 and meta-analysis of randomised controlled trials. *BMJ (Clinical research ed)*  
14  
15 2014;348:g3174.  
16  
17

18  
19 64. Freese KE, Kokai L, Edwards RP, et al. Adipose-derived stems cells and their role in  
20  
21 human cancer development, growth, progression, and metastasis: a systematic review.  
22  
23 *Cancer research* 2015;75(7):1161-8.  
24  
25

26  
27 65. Friebel TM, Domchek SM, Rebbeck TR. Modifiers of cancer risk in BRCA1 and BRCA2  
28  
29 mutation carriers: systematic review and meta-analysis. *Journal of the National Cancer*  
30  
31 *Institute* 2014;106(6):dju091.  
32  
33

34  
35 66. Garcia MK, McQuade J, Haddad R, et al. Systematic review of acupuncture in cancer  
36  
37 care: a synthesis of the evidence. *Journal of clinical oncology : official journal of the*  
38  
39 *American Society of Clinical Oncology* 2013;31(7):952-60.  
40  
41

42  
43 67. Gardner JR, Livingston PM, Fraser SF. Effects of exercise on treatment-related  
44  
45 adverse effects for patients with prostate cancer receiving androgen-deprivation  
46  
47 therapy: a systematic review. *Journal of clinical oncology : official journal of the*  
48  
49 *American Society of Clinical Oncology* 2014;32(4):335-46.  
50  
51

52  
53 68. Gennari A, Stockler M, Puntoni M, et al. Duration of chemotherapy for metastatic  
54  
55 breast cancer: a systematic review and meta-analysis of randomized clinical trials.  
56  
57 *Journal of clinical oncology : official journal of the American Society of Clinical Oncology*  
58  
59 2011;29(16):2144-9.  
60

- 1  
2  
3 69. Ghesquieres H, Slager SL, Jardin F, et al. Genome-Wide Association Study of Event-  
4 Free Survival in Diffuse Large B-Cell Lymphoma Treated With Immunochemotherapy.  
5 Journal of clinical oncology : official journal of the American Society of Clinical Oncology  
6 2015;33(33):3930-7.  
7  
8  
9  
10  
11  
12  
13 70. Greco MT, Roberto A, Corli O, et al. Quality of cancer pain management: an update of  
14 a systematic review of undertreatment of patients with cancer. Journal of clinical  
15 oncology : official journal of the American Society of Clinical Oncology  
16 2014;32(36):4149-54.  
17  
18  
19  
20  
21  
22  
23 71. Green J, Cairns BJ, Casabonne D, et al. Height and cancer incidence in the Million  
24 Women Study: prospective cohort, and meta-analysis of prospective studies of height  
25 and total cancer risk. The Lancet Oncology 2011;12(8):785-94.  
26  
27  
28  
29  
30  
31  
32 72. Gupta S, Hunsberger S, Boerner SA, et al. Meta-analysis of the relationship between  
33 dose and benefit in phase I targeted agent trials. Journal of the National Cancer Institute  
34 2012;104(24):1860-6.  
35  
36  
37  
38  
39  
40 73. Hamaker ME, Jonker JM, de Rooij SE, et al. Frailty screening methods for predicting  
41 outcome of a comprehensive geriatric assessment in elderly patients with cancer: a  
42 systematic review. The Lancet Oncology 2012;13(10):e437-44.  
43  
44  
45  
46  
47  
48 74. Hart SL, Hoyt MA, Diefenbach M, et al. Meta-analysis of efficacy of interventions for  
49 elevated depressive symptoms in adults diagnosed with cancer. Journal of the National  
50 Cancer Institute 2012;104(13):990-1004.  
51  
52  
53  
54  
55  
56 75. Hayes JH, Barry MJ. Screening for prostate cancer with the prostate-specific antigen  
57 test: a review of current evidence. Jama 2014;311(11):1143-9.  
58  
59  
60

1  
2  
3 76. Heikkila K, Nyberg ST, Theorell T, et al. Work stress and risk of cancer: meta-analysis  
4  
5 of 5700 incident cancer events in 116,000 European men and women. *BMJ (Clinical*  
6  
7 *research ed)* 2013;346:f165.  
8  
9

10  
11 77. Heine JJ, Scott CG, Sellers TA, et al. A novel automated mammographic density  
12  
13 measure and breast cancer risk. *Journal of the National Cancer Institute*  
14  
15 2012;104(13):1028-37.  
16  
17

18  
19 78. Heleno B, Thomsen MF, Rodrigues DS, et al. Quantification of harms in cancer  
20  
21 screening trials: literature review. *BMJ (Clinical research ed)* 2013;347:f5334.  
22  
23

24  
25 79. Henson KE, Jagsi R, Cutter D, et al. Inferring the Effects of Cancer Treatment:  
26  
27 Divergent Results From Early Breast Cancer Trialists' Collaborative Group Meta-  
28  
29 Analyses of Randomized Trials and Observational Data From SEER Registries. *Journal of*  
30  
31 *clinical oncology : official journal of the American Society of Clinical Oncology* 2016.  
32  
33

34  
35 80. Henson LA, Gao W, Higginson IJ, et al. Emergency department attendance by patients  
36  
37 with cancer in their last month of life: a systematic review and meta-analysis. *Journal of*  
38  
39 *clinical oncology : official journal of the American Society of Clinical Oncology*  
40  
41 2015;33(4):370-6.  
42  
43

44  
45 81. Hills RK, Castaigne S, Appelbaum FR, et al. Addition of gemtuzumab ozogamicin to  
46  
47 induction chemotherapy in adult patients with acute myeloid leukaemia: a meta-analysis  
48  
49 of individual patient data from randomised controlled trials. *The Lancet Oncology*  
50  
51 2014;15(9):986-96.  
52  
53

54  
55 82. Hollevoet K, Reitsma JB, Creaney J, et al. Serum mesothelin for diagnosing malignant  
56  
57 pleural mesothelioma: an individual patient data meta-analysis. *Journal of clinical*  
58  
59  
60

1  
2  
3 oncology : official journal of the American Society of Clinical Oncology  
4  
5 2012;30(13):1541-9.  
6  
7

8  
9 83. Horgan AM, Amir E, Walter T, et al. Adjuvant therapy in the treatment of biliary tract  
10  
11 cancer: a systematic review and meta-analysis. Journal of clinical oncology : official  
12  
13 journal of the American Society of Clinical Oncology 2012;30(16):1934-40.  
14  
15

16  
17 84. Hornberger J, Alvarado MD, Rebecca C, et al. Clinical validity/utility, change in  
18  
19 practice patterns, and economic implications of risk stratifiers to predict outcomes for  
20  
21 early-stage breast cancer: a systematic review. Journal of the National Cancer Institute  
22  
23 2012;104(14):1068-79.  
24  
25

26  
27 85. Horowitz NA, Benyamini N, Wohlfart K, et al. Reproductive organ involvement in  
28  
29 non-Hodgkin lymphoma during pregnancy: a systematic review. The Lancet Oncology  
30  
31 2013;14(7):e275-82.  
32  
33

34  
35 86. Houssami N, Turner R, Macaskill P, et al. An individual person data meta-analysis of  
36  
37 preoperative magnetic resonance imaging and breast cancer recurrence. Journal of  
38  
39 clinical oncology : official journal of the American Society of Clinical Oncology  
40  
41 2014;32(5):392-401.  
42  
43

44  
45 87. Howard-Anderson J, Ganz PA, Bower JE, et al. Quality of life, fertility concerns, and  
46  
47 behavioral health outcomes in younger breast cancer survivors: a systematic review.  
48  
49 Journal of the National Cancer Institute 2012;104(5):386-405.  
50  
51

52  
53 88. Hurwitz HI, Saltz LB, Van Cutsem E, et al. Venous thromboembolic events with  
54  
55 chemotherapy plus bevacizumab: a pooled analysis of patients in randomized phase II  
56  
57 and III studies. Journal of clinical oncology : official journal of the American Society of  
58  
59 Clinical Oncology 2011;29(13):1757-64.  
60



- 1  
2  
3 89. Jenkins MA, Dowty JG, Ait Ouakrim D, et al. Short-term risk of colorectal cancer in  
4 individuals with lynch syndrome: a meta-analysis. *Journal of clinical oncology : official*  
5  
6 *journal of the American Society of Clinical Oncology* 2015;33(4):326-31.  
7  
8  
9  
10  
11 90. Jim HS, Phillips KM, Chait S, et al. Meta-analysis of cognitive functioning in breast  
12 cancer survivors previously treated with standard-dose chemotherapy. *Journal of*  
13  
14 *clinical oncology : official journal of the American Society of Clinical Oncology*  
15  
16 2012;30(29):3578-87.  
17  
18  
19  
20  
21 91. Joensuu H, Vehtari A, Riihimaki J, et al. Risk of recurrence of gastrointestinal stromal  
22 tumour after surgery: an analysis of pooled population-based cohorts. *The Lancet*  
23  
24 *Oncology* 2012;13(3):265-74.  
25  
26  
27  
28  
29 92. Jung S, Spiegelman D, Baglietto L, et al. Fruit and vegetable intake and risk of breast  
30 cancer by hormone receptor status. *Journal of the National Cancer Institute*  
31  
32 2013;105(3):219-36.  
33  
34  
35  
36  
37 93. Kamangar F, Shakeri R, Malekzadeh R, et al. Opium use: an emerging risk factor for  
38 cancer? *The Lancet Oncology* 2014;15(2):e69-77.  
39  
40  
41  
42  
43 94. Keum N, Greenwood DC, Lee DH, et al. Adult weight gain and adiposity-related  
44 cancers: a dose-response meta-analysis of prospective observational studies. *Journal of*  
45  
46 *the National Cancer Institute* 2015;107(2).  
47  
48  
49  
50  
51 95. Kiely BE, Soon YY, Tattersall MH, et al. How long have I got? Estimating typical, best-  
52 case, and worst-case scenarios for patients starting first-line chemotherapy for  
53  
54 metastatic breast cancer: a systematic review of recent randomized trials. *Journal of*  
55  
56 *clinical oncology : official journal of the American Society of Clinical Oncology*  
57  
58 2011;29(4):456-63.  
59  
60

- 1  
2  
3 96. Knoll GA, Kokolo MB, Mallick R, et al. Effect of sirolimus on malignancy and survival  
4 after kidney transplantation: systematic review and meta-analysis of individual patient  
5 data. *BMJ (Clinical research ed)* 2014;349:g6679.  
6  
7  
8  
9  
10  
11 97. Kolaheer F, Jang SL, Corriveau A, et al. Knowledge, attitudes, and behaviours  
12 towards cancer screening in indigenous populations: a systematic review. *The Lancet*  
13 *Oncology* 2014;15(11):e504-16.  
14  
15  
16  
17  
18  
19 98. Kong A, Johnson N, Kitchener HC, et al. Adjuvant radiotherapy for stage I endometrial  
20 cancer: an updated Cochrane systematic review and meta-analysis. *Journal of the*  
21 *National Cancer Institute* 2012;104(21):1625-34.  
22  
23  
24  
25  
26  
27 99. Kotecha RS, Pascoe EM, Rushing EJ, et al. Meningiomas in children and adolescents: a  
28 meta-analysis of individual patient data. *The Lancet Oncology* 2011;12(13):1229-39.  
29  
30  
31  
32  
33 100. Kotronoulas G, Kearney N, Maguire R, et al. What is the value of the routine use of  
34 patient-reported outcome measures toward improvement of patient outcomes,  
35 processes of care, and health service outcomes in cancer care? A systematic review of  
36 controlled trials. *Journal of clinical oncology : official journal of the American Society of*  
37 *Clinical Oncology* 2014;32(14):1480-501.  
38  
39  
40  
41  
42  
43  
44  
45 101. Kubben PL, ter Meulen KJ, Schijns OE, et al. Intraoperative MRI-guided resection of  
46 glioblastoma multiforme: a systematic review. *The Lancet Oncology* 2011;12(11):1062-  
47 70.  
48  
49  
50  
51  
52  
53 102. Kumar N, Chen Y, Zaw AS, et al. Use of intraoperative cell-salvage for autologous  
54 blood transfusions in metastatic spine tumour surgery: a systematic review. *The Lancet*  
55 *Oncology* 2014;15(1):e33-41.  
56  
57  
58  
59  
60

- 1  
2  
3 103. Kyrgiou M, Mitra A, Arbyn M, et al. Fertility and early pregnancy outcomes after  
4 treatment for cervical intraepithelial neoplasia: systematic review and meta-analysis.  
5  
6  
7  
8 BMJ (Clinical research ed) 2014;349:g6192.  
9  
10  
11 104. Lallas A, Kyrgidis A, Ferrara G, et al. Atypical Spitz tumours and sentinel lymph  
12 node biopsy: a systematic review. *The Lancet Oncology* 2014;15(4):e178-83.  
13  
14  
15  
16 105. Lansbury L, Bath-Hextall F, Perkins W, et al. Interventions for non-metastatic  
17 squamous cell carcinoma of the skin: systematic review and pooled analysis of  
18  
19  
20  
21  
22  
23  
24  
25 106. Laurie SA, Ho AL, Fury MG, et al. Systemic therapy in the management of metastatic  
26 or locally recurrent adenoid cystic carcinoma of the salivary glands: a systematic review.  
27  
28  
29  
30  
31  
32  
33  
34 107. Lavigne E, Holowaty EJ, Pan SY, et al. Breast cancer detection and survival among  
35 women with cosmetic breast implants: systematic review and meta-analysis of  
36  
37  
38  
39  
40  
41  
42  
43  
44  
45  
46  
47  
48  
49 108. Lee CK, Brown C, Gralla RJ, et al. Impact of EGFR inhibitor in non-small cell lung  
50 cancer on progression-free and overall survival: a meta-analysis. *Journal of the National*  
51  
52  
53  
54  
55  
56  
57  
58  
59  
60  
60  
61  
62  
63  
64  
65  
66  
67  
68  
69  
70  
71  
72  
73  
74  
75  
76  
77  
78  
79  
80  
81  
82  
83  
84  
85  
86  
87  
88  
89  
90  
91  
92  
93  
94  
95  
96  
97  
98  
99  
100  
101  
102  
103  
104  
105  
106  
107  
108  
109  
110  
111  
112  
113  
114  
115  
116  
117  
118  
119  
120  
121  
122  
123  
124  
125  
126  
127  
128  
129  
130  
131  
132  
133  
134  
135  
136  
137  
138  
139  
140  
141  
142  
143  
144  
145  
146  
147  
148  
149  
150  
151  
152  
153  
154  
155  
156  
157  
158  
159  
160  
161  
162  
163  
164  
165  
166  
167  
168  
169  
170  
171  
172  
173  
174  
175  
176  
177  
178  
179  
180  
181  
182  
183  
184  
185  
186  
187  
188  
189  
190  
191  
192  
193  
194  
195  
196  
197  
198  
199  
200  
201  
202  
203  
204  
205  
206  
207  
208  
209  
210  
211  
212  
213  
214  
215  
216  
217  
218  
219  
220  
221  
222  
223  
224  
225  
226  
227  
228  
229  
230  
231  
232  
233  
234  
235  
236  
237  
238  
239  
240  
241  
242  
243  
244  
245  
246  
247  
248  
249  
250  
251  
252  
253  
254  
255  
256  
257  
258  
259  
260  
261  
262  
263  
264  
265  
266  
267  
268  
269  
270  
271  
272  
273  
274  
275  
276  
277  
278  
279  
280  
281  
282  
283  
284  
285  
286  
287  
288  
289  
290  
291  
292  
293  
294  
295  
296  
297  
298  
299  
300  
301  
302  
303  
304  
305  
306  
307  
308  
309  
310  
311  
312  
313  
314  
315  
316  
317  
318  
319  
320  
321  
322  
323  
324  
325  
326  
327  
328  
329  
330  
331  
332  
333  
334  
335  
336  
337  
338  
339  
340  
341  
342  
343  
344  
345  
346  
347  
348  
349  
350  
351  
352  
353  
354  
355  
356  
357  
358  
359  
360  
361  
362  
363  
364  
365  
366  
367  
368  
369  
370  
371  
372  
373  
374  
375  
376  
377  
378  
379  
380  
381  
382  
383  
384  
385  
386  
387  
388  
389  
390  
391  
392  
393  
394  
395  
396  
397  
398  
399  
400  
401  
402  
403  
404  
405  
406  
407  
408  
409  
410  
411  
412  
413  
414  
415  
416  
417  
418  
419  
420  
421  
422  
423  
424  
425  
426  
427  
428  
429  
430  
431  
432  
433  
434  
435  
436  
437  
438  
439  
440  
441  
442  
443  
444  
445  
446  
447  
448  
449  
450  
451  
452  
453  
454  
455  
456  
457  
458  
459  
460  
461  
462  
463  
464  
465  
466  
467  
468  
469  
470  
471  
472  
473  
474  
475  
476  
477  
478  
479  
480  
481  
482  
483  
484  
485  
486  
487  
488  
489  
490  
491  
492  
493  
494  
495  
496  
497  
498  
499  
500  
501  
502  
503  
504  
505  
506  
507  
508  
509  
510  
511  
512  
513  
514  
515  
516  
517  
518  
519  
520  
521  
522  
523  
524  
525  
526  
527  
528  
529  
530  
531  
532  
533  
534  
535  
536  
537  
538  
539  
540  
541  
542  
543  
544  
545  
546  
547  
548  
549  
550  
551  
552  
553  
554  
555  
556  
557  
558  
559  
560  
561  
562  
563  
564  
565  
566  
567  
568  
569  
570  
571  
572  
573  
574  
575  
576  
577  
578  
579  
580  
581  
582  
583  
584  
585  
586  
587  
588  
589  
590  
591  
592  
593  
594  
595  
596  
597  
598  
599  
600  
601  
602  
603  
604  
605  
606  
607  
608  
609  
610  
611  
612  
613  
614  
615  
616  
617  
618  
619  
620  
621  
622  
623  
624  
625  
626  
627  
628  
629  
630  
631  
632  
633  
634  
635  
636  
637  
638  
639  
640  
641  
642  
643  
644  
645  
646  
647  
648  
649  
650  
651  
652  
653  
654  
655  
656  
657  
658  
659  
660  
661  
662  
663  
664  
665  
666  
667  
668  
669  
670  
671  
672  
673  
674  
675  
676  
677  
678  
679  
680  
681  
682  
683  
684  
685  
686  
687  
688  
689  
690  
691  
692  
693  
694  
695  
696  
697  
698  
699  
700  
701  
702  
703  
704  
705  
706  
707  
708  
709  
710  
711  
712  
713  
714  
715  
716  
717  
718  
719  
720  
721  
722  
723  
724  
725  
726  
727  
728  
729  
730  
731  
732  
733  
734  
735  
736  
737  
738  
739  
740  
741  
742  
743  
744  
745  
746  
747  
748  
749  
750  
751  
752  
753  
754  
755  
756  
757  
758  
759  
760  
761  
762  
763  
764  
765  
766  
767  
768  
769  
770  
771  
772  
773  
774  
775  
776  
777  
778  
779  
780  
781  
782  
783  
784  
785  
786  
787  
788  
789  
790  
791  
792  
793  
794  
795  
796  
797  
798  
799  
800  
801  
802  
803  
804  
805  
806  
807  
808  
809  
810  
811  
812  
813  
814  
815  
816  
817  
818  
819  
820  
821  
822  
823  
824  
825  
826  
827  
828  
829  
830  
831  
832  
833  
834  
835  
836  
837  
838  
839  
840  
841  
842  
843  
844  
845  
846  
847  
848  
849  
850  
851  
852  
853  
854  
855  
856  
857  
858  
859  
860  
861  
862  
863  
864  
865  
866  
867  
868  
869  
870  
871  
872  
873  
874  
875  
876  
877  
878  
879  
880  
881  
882  
883  
884  
885  
886  
887  
888  
889  
890  
891  
892  
893  
894  
895  
896  
897  
898  
899  
900  
901  
902  
903  
904  
905  
906  
907  
908  
909  
910  
911  
912  
913  
914  
915  
916  
917  
918  
919  
920  
921  
922  
923  
924  
925  
926  
927  
928  
929  
930  
931  
932  
933  
934  
935  
936  
937  
938  
939  
940  
941  
942  
943  
944  
945  
946  
947  
948  
949  
950  
951  
952  
953  
954  
955  
956  
957  
958  
959  
960  
961  
962  
963  
964  
965  
966  
967  
968  
969  
970  
971  
972  
973  
974  
975  
976  
977  
978  
979  
980  
981  
982  
983  
984  
985  
986  
987  
988  
989  
990  
991  
992  
993  
994  
995  
996  
997  
998  
999  
1000

- 1  
2  
3 110. Lee JK, Hahn S, Kim DW, et al. Epidermal growth factor receptor tyrosine kinase  
4 inhibitors vs conventional chemotherapy in non-small cell lung cancer harboring wild-  
5 type epidermal growth factor receptor: a meta-analysis. *Jama* 2014;311(14):1430-7.  
6  
7  
8  
9  
10  
11 111. Lee L, Cheung WY, Atkinson E, et al. Impact of comorbidity on chemotherapy use  
12 and outcomes in solid tumors: a systematic review. *Journal of clinical oncology : official*  
13 *journal of the American Society of Clinical Oncology* 2011;29(1):106-17.  
14  
15  
16  
17  
18  
19 112. Lee SJ, Boscardin WJ, Stijacic-Cenzer I, et al. Time lag to benefit after screening for  
20 breast and colorectal cancer: meta-analysis of survival data from the United States,  
21 Sweden, United Kingdom, and Denmark. *BMJ (Clinical research ed)* 2013;346:e8441.  
22  
23  
24  
25  
26  
27 113. Liao WC, Chien KL, Lin YL, et al. Adjuvant treatments for resected pancreatic  
28 adenocarcinoma: a systematic review and network meta-analysis. *The Lancet Oncology*  
29 2013;14(11):1095-103.  
30  
31  
32  
33  
34  
35 114. Liao WC, Tu YK, Wu MS, et al. Blood glucose concentration and risk of pancreatic  
36 cancer: systematic review and dose-response meta-analysis. *BMJ (Clinical research ed)*  
37 2015;349:g7371.  
38  
39  
40  
41  
42  
43 115. Lippitz BE. Cytokine patterns in patients with cancer: a systematic review. *The*  
44 *Lancet Oncology* 2013;14(6):e218-28.  
45  
46  
47  
48  
49 116. Lopez-Olivo MA, Tayar JH, Martinez-Lopez JA, et al. Risk of malignancies in patients  
50 with rheumatoid arthritis treated with biologic therapy: a meta-analysis. *Jama*  
51 2012;308(9):898-908.  
52  
53  
54  
55  
56  
57  
58  
59  
60

- 1  
2  
3 117. Lockett T, Goldstein D, Butow PN, et al. Psychological morbidity and quality of life  
4 of ethnic minority patients with cancer: a systematic review and meta-analysis. The  
5  
6 Lancet Oncology 2011;12(13):1240-8.  
7  
8  
9  
10  
11 118. Ma Y, Zhang P, Wang F, et al. Association between vitamin D and risk of colorectal  
12 cancer: a systematic review of prospective studies. Journal of clinical oncology : official  
13 journal of the American Society of Clinical Oncology 2011;29(28):3775-82.  
14  
15  
16  
17  
18 119. Machalek DA, Poynten M, Jin F, et al. Anal human papillomavirus infection and  
19 associated neoplastic lesions in men who have sex with men: a systematic review and  
20 meta-analysis. The Lancet Oncology 2012;13(5):487-500.  
21  
22  
23  
24  
25  
26  
27 120. Mak RH, Hunt D, Shipley WU, et al. Long-term outcomes in patients with muscle-  
28 invasive bladder cancer after selective bladder-preserving combined-modality therapy:  
29 a pooled analysis of Radiation Therapy Oncology Group protocols 8802, 8903, 9506,  
30 9706, 9906, and 0233. Journal of clinical oncology : official journal of the American  
31 Society of Clinical Oncology 2014;32(34):3801-9.  
32  
33  
34  
35  
36  
37  
38  
39  
40 121. Maltoni M, Scarpi E, Rosati M, et al. Palliative sedation in end-of-life care and  
41 survival: a systematic review. Journal of clinical oncology : official journal of the  
42 American Society of Clinical Oncology 2012;30(12):1378-83.  
43  
44  
45  
46  
47  
48 122. Manceau G, Karoui M, Werner A, et al. Comparative outcomes of rectal cancer  
49 surgery between elderly and non-elderly patients: a systematic review. The Lancet  
50 Oncology 2012;13(12):e525-36.  
51  
52  
53  
54  
55  
56 123. Marinovich ML, Houssami N, Macaskill P, et al. Meta-analysis of magnetic resonance  
57 imaging in detecting residual breast cancer after neoadjuvant therapy. Journal of the  
58 National Cancer Institute 2013;105(5):321-33.  
59  
60

1  
2  
3 124. Markar SR, Wiggins T, Ni M, et al. Assessment of the quality of surgery within  
4  
5 randomised controlled trials for the treatment of gastro-oesophageal cancer: a  
6  
7 systematic review. *The Lancet Oncology* 2015;16(1):e23-31.  
8  
9

10  
11 125. Martin-Doyle W, Leow JJ, Orsola A, et al. Improving selection criteria for early  
12  
13 cystectomy in high-grade t1 bladder cancer: a meta-analysis of 15,215 patients. *Journal*  
14  
15 *of clinical oncology : official journal of the American Society of Clinical Oncology*  
16  
17 2015;33(6):643-50.  
18  
19

20  
21 126. Mauguen A, Le Pechoux C, Saunders MI, et al. Hyperfractionated or accelerated  
22  
23 radiotherapy in lung cancer: an individual patient data meta-analysis. *Journal of clinical*  
24  
25 *oncology : official journal of the American Society of Clinical Oncology*  
26  
27 2012;30(22):2788-97.  
28  
29

30  
31 127. McGale P, Taylor C, Correa C, et al. Effect of radiotherapy after mastectomy and  
32  
33 axillary surgery on 10-year recurrence and 20-year breast cancer mortality: meta-  
34  
35 analysis of individual patient data for 8135 women in 22 randomised trials. *Lancet*  
36  
37 (London, England) 2014;383(9935):2127-35.  
38  
39

40  
41 128. Meulendijks D, Henricks LM, Sonke GS, et al. Clinical relevance of DPYD variants  
42  
43 c.1679T>G, c.1236G>A/HapB3, and c.1601G>A as predictors of severe fluoropyrimidine-  
44  
45 associated toxicity: a systematic review and meta-analysis of individual patient data. *The*  
46  
47 *Lancet Oncology* 2015;16(16):1639-50.  
48  
49

50  
51 129. Mitchell AJ, Chan M, Bhatti H, et al. Prevalence of depression, anxiety, and  
52  
53 adjustment disorder in oncological, haematological, and palliative-care settings: a meta-  
54  
55 analysis of 94 interview-based studies. *The Lancet Oncology* 2011;12(2):160-74.  
56  
57  
58  
59  
60

- 1  
2  
3 130. Mitchell AJ, Ferguson DW, Gill J, et al. Depression and anxiety in long-term cancer  
4 survivors compared with spouses and healthy controls: a systematic review and meta-  
5 analysis. *The Lancet Oncology* 2013;14(8):721-32.  
6  
7  
8  
9  
10  
11 131. Mocellin S, Pilati P, Briarava M, et al. Breast Cancer Chemoprevention: A Network  
12 Meta-Analysis of Randomized Controlled Trials. *Journal of the National Cancer Institute*  
13 2016;108(2).  
14  
15  
16  
17  
18  
19 132. Mocellin S, Verdi D, Pooley KA, et al. Telomerase reverse transcriptase locus  
20 polymorphisms and cancer risk: a field synopsis and meta-analysis. *Journal of the*  
21 *National Cancer Institute* 2012;104(11):840-54.  
22  
23  
24  
25  
26  
27 133. Moorman PG, Havrilesky LJ, Gierisch JM, et al. Oral contraceptives and risk of  
28 ovarian cancer and breast cancer among high-risk women: a systematic review and  
29 meta-analysis. *Journal of clinical oncology : official journal of the American Society of*  
30 *Clinical Oncology* 2013;31(33):4188-98.  
31  
32  
33  
34  
35  
36  
37 134. Myers ER, Moorman P, Gierisch JM, et al. Benefits and Harms of Breast Cancer  
38 Screening: A Systematic Review. *Jama* 2015;314(15):1615-34.  
39  
40  
41  
42  
43 135. Nagayama A, Hayashida T, Jinno H, et al. Comparative effectiveness of neoadjuvant  
44 therapy for HER2-positive breast cancer: a network meta-analysis. *Journal of the*  
45 *National Cancer Institute* 2014;106(9).  
46  
47  
48  
49  
50  
51 136. Nair VS, Maeda LS, Ioannidis JP. Clinical outcome prediction by microRNAs in  
52 human cancer: a systematic review. *Journal of the National Cancer Institute*  
53 2012;104(7):528-40.  
54  
55  
56  
57  
58  
59  
60

- 1  
2  
3 137. Ndiaye C, Mena M, Alemany L, et al. HPV DNA, E6/E7 mRNA, and p16INK4a  
4  
5 detection in head and neck cancers: a systematic review and meta-analysis. *The Lancet*  
6  
7 *Oncology* 2014;15(12):1319-31.  
8  
9  
10  
11 138. Nguyen PL, Je Y, Schutz FA, et al. Association of androgen deprivation therapy with  
12  
13 cardiovascular death in patients with prostate cancer: a meta-analysis of randomized  
14  
15 trials. *Jama* 2011;306(21):2359-66.  
16  
17  
18  
19 139. Niraula S, Amir E, Vera-Badillo F, et al. Risk of incremental toxicities and associated  
20  
21 costs of new anticancer drugs: a meta-analysis. *Journal of clinical oncology : official*  
22  
23 *journal of the American Society of Clinical Oncology* 2014;32(32):3634-42.  
24  
25  
26  
27 140. Niraula S, Le LW, Tannock IF. Treatment of prostate cancer with intermittent  
28  
29 versus continuous androgen deprivation: a systematic review of randomized trials.  
30  
31 *Journal of clinical oncology : official journal of the American Society of Clinical Oncology*  
32  
33 2013;31(16):2029-36.  
34  
35  
36  
37 141. Niraula S, Seruga B, Ocana A, et al. The price we pay for progress: a meta-analysis of  
38  
39 harms of newly approved anticancer drugs. *Journal of clinical oncology : official journal*  
40  
41 *of the American Society of Clinical Oncology* 2012;30(24):3012-9.  
42  
43  
44  
45 142. Oba K, Paoletti X, Alberts S, et al. Disease-free survival as a surrogate for overall  
46  
47 survival in adjuvant trials of gastric cancer: a meta-analysis. *Journal of the National*  
48  
49 *Cancer Institute* 2013;105(21):1600-7.  
50  
51  
52  
53 143. Ocana A, Vera-Badillo F, Seruga B, et al. HER3 overexpression and survival in solid  
54  
55 tumors: a meta-analysis. *Journal of the National Cancer Institute* 2013;105(4):266-73.  
56  
57  
58  
59  
60



- 1  
2  
3 144. Ohri N, Shen X, Dicker AP, et al. Radiotherapy protocol deviations and clinical  
4  
5 outcomes: a meta-analysis of cooperative group clinical trials. *Journal of the National*  
6  
7 *Cancer Institute* 2013;105(6):387-93.  
8  
9  
10  
11 145. Oostendorp LJ, Stalmeier PF, Donders AR, et al. Efficacy and safety of palliative  
12  
13 chemotherapy for patients with advanced breast cancer pretreated with anthracyclines  
14  
15 and taxanes: a systematic review. *The Lancet Oncology* 2011;12(11):1053-61.  
16  
17  
18  
19 146. O'Sullivan CC, Bradbury I, Campbell C, et al. Efficacy of Adjuvant Trastuzumab for  
20  
21 Patients With Human Epidermal Growth Factor Receptor 2-Positive Early Breast Cancer  
22  
23 and Tumors  $\leq 2$  cm: A Meta-Analysis of the Randomized Trastuzumab Trials. *Journal*  
24  
25 *of clinical oncology : official journal of the American Society of Clinical Oncology*  
26  
27 2015;33(24):2600-8.  
28  
29  
30  
31  
32 147. Pace LE, Keating NL. A systematic assessment of benefits and risks to guide breast  
33  
34 cancer screening decisions. *Jama* 2014;311(13):1327-35.  
35  
36  
37  
38 148. Palumbo A, Bringhen S, Kumar SK, et al. Second primary malignancies with  
39  
40 lenalidomide therapy for newly diagnosed myeloma: a meta-analysis of individual  
41  
42 patient data. *The Lancet Oncology* 2014;15(3):333-42.  
43  
44  
45  
46 149. Patel SH, Wang Z, Wong WW, et al. Charged particle therapy versus photon therapy  
47  
48 for paranasal sinus and nasal cavity malignant diseases: a systematic review and meta-  
49  
50 analysis. *The Lancet Oncology* 2014;15(9):1027-38.  
51  
52  
53  
54 150. Peairs KS, Barone BB, Snyder CF, et al. Diabetes mellitus and breast cancer  
55  
56 outcomes: a systematic review and meta-analysis. *Journal of clinical oncology : official*  
57  
58 *journal of the American Society of Clinical Oncology* 2011;29(1):40-6.  
59  
60

- 1  
2  
3 151. Pearce CL, Templeman C, Rossing MA, et al. Association between endometriosis and  
4 risk of histological subtypes of ovarian cancer: a pooled analysis of case-control studies.  
5  
6 The Lancet Oncology 2012;13(4):385-94.  
7  
8  
9  
10  
11 152. Peto R, Davies C, Godwin J, et al. Comparisons between different polychemotherapy  
12 regimens for early breast cancer: meta-analyses of long-term outcome among 100,000  
13 women in 123 randomised trials. Lancet (London, England) 2012;379(9814):432-44.  
14  
15  
16  
17  
18 153. Pettersson A, Graff RE, Ursin G, et al. Mammographic density phenotypes and risk of  
19 breast cancer: a meta-analysis. Journal of the National Cancer Institute 2014;106(5).  
20  
21  
22  
23  
24 154. Phi XA, Houssami N, Obdeijn IM, et al. Magnetic resonance imaging improves breast  
25 screening sensitivity in BRCA mutation carriers age  $\geq$  50 years: evidence from an  
26 individual patient data meta-analysis. Journal of clinical oncology : official journal of the  
27 American Society of Clinical Oncology 2015;33(4):349-56.  
28  
29  
30  
31  
32 155. Pilarski R, Burt R, Kohlman W, et al. Cowden syndrome and the PTEN hamartoma  
33 tumor syndrome: systematic review and revised diagnostic criteria. Journal of the  
34 National Cancer Institute 2013;105(21):1607-16.  
35  
36  
37  
38  
39  
40  
41  
42  
43 156. Playdon MC, Bracken MB, Sanft TB, et al. Weight Gain After Breast Cancer Diagnosis  
44 and All-Cause Mortality: Systematic Review and Meta-Analysis. Journal of the National  
45 Cancer Institute 2015;107(12):djv275.  
46  
47  
48  
49  
50  
51 157. Potter S, Brigic A, Whiting PF, et al. Reporting clinical outcomes of breast  
52 reconstruction: a systematic review. Journal of the National Cancer Institute  
53  
54  
55  
56 2011;103(1):31-46.  
57  
58  
59  
60

- 1  
2  
3 158. Proverbs-Singh T, Chiu SK, Liu Z, et al. Arterial thromboembolism in cancer patients  
4 treated with cisplatin: a systematic review and meta-analysis. *Journal of the National*  
5  
6  
7  
8  
9  
10  
11 159. Puts MT, Hardt J, Monette J, et al. Use of geriatric assessment for older adults in the  
12  
13  
14  
15  
16  
17  
18  
19 160. Raaschou-Nielsen O, Andersen ZJ, Beelen R, et al. Air pollution and lung cancer  
20  
21  
22  
23  
24  
25  
26  
27  
28  
29  
30  
31  
32  
33  
34  
35  
36  
37  
38  
39  
40  
41  
42  
43  
44  
45  
46  
47  
48  
49  
50  
51  
52  
53  
54  
55  
56  
57  
58  
59  
60
161. Rahbari NN, Bork U, Motschall E, et al. Molecular detection of tumor cells in regional lymph nodes is associated with disease recurrence and poor survival in node-negative colorectal cancer: a systematic review and meta-analysis. *Journal of clinical oncology : official journal of the American Society of Clinical Oncology* 2012;30(1):60-70.
162. Ranpura V, Hapani S, Wu S. Treatment-related mortality with bevacizumab in cancer patients: a meta-analysis. *Jama* 2011;305(5):487-94.
163. Rao R, Euhus D, Mayo HG, et al. Axillary node interventions in breast cancer: a systematic review. *Jama* 2013;310(13):1385-94.
164. Rebolj M, Bonde J, Njor SH, et al. Human papillomavirus testing in primary cervical screening and the cut-off level for hybrid capture 2 tests: systematic review. *BMJ (Clinical research ed)* 2011;342:d2757.

- 1  
2  
3 165. Richards CJ, Je Y, Schutz FA, et al. Incidence and risk of congestive heart failure in  
4 patients with renal and nonrenal cell carcinoma treated with sunitinib. *Journal of clinical*  
5  
6  
7  
8 oncology : official journal of the American Society of Clinical Oncology  
9  
10 2011;29(25):3450-6.  
11  
12  
13 166. Riester M, Wei W, Waldron L, et al. Risk prediction for late-stage ovarian cancer by  
14 meta-analysis of 1525 patient samples. *Journal of the National Cancer Institute*  
15  
16  
17 2014;106(5).  
18  
19  
20  
21 167. Rooney AG, Carson A, Grant R. Depression in cerebral glioma patients: a systematic  
22 review of observational studies. *Journal of the National Cancer Institute*  
23  
24  
25 2011;103(1):61-76.  
26  
27  
28  
29 168. Rosmarin D, Palles C, Church D, et al. Genetic markers of toxicity from capecitabine  
30 and other fluorouracil-based regimens: investigation in the QUASAR2 study, systematic  
31 review, and meta-analysis. *Journal of clinical oncology : official journal of the American*  
32  
33  
34  
35  
36  
37 Society of Clinical Oncology 2014;32(10):1031-9.  
38  
39  
40 169. Rossi A, Chiodini P, Sun JM, et al. Six versus fewer planned cycles of first-line  
41 platinum-based chemotherapy for non-small-cell lung cancer: a systematic review and  
42  
43  
44  
45 meta-analysis of individual patient data. *The Lancet Oncology* 2014;15(11):1254-62.  
46  
47  
48 170. Rossi A, Di Maio M, Chiodini P, et al. Carboplatin- or cisplatin-based chemotherapy  
49 in first-line treatment of small-cell lung cancer: the COCIS meta-analysis of individual  
50  
51  
52  
53 patient data. *Journal of clinical oncology : official journal of the American Society of*  
54  
55  
56  
57  
58  
59  
60  
Clinical Oncology 2012;30(14):1692-8.

- 1  
2  
3 171. Rothwell PM, Fowkes FG, Belch JF, et al. Effect of daily aspirin on long-term risk of  
4 death due to cancer: analysis of individual patient data from randomised trials. *Lancet*  
5  
6 (London, England) 2011;377(9759):31-41.  
7  
8  
9  
10  
11 172. Rothwell PM, Price JF, Fowkes FG, et al. Short-term effects of daily aspirin on cancer  
12 incidence, mortality, and non-vascular death: analysis of the time course of risks and  
13 benefits in 51 randomised controlled trials. *Lancet* (London, England)  
14  
15 2012;379(9826):1602-12.  
16  
17  
18  
19  
20  
21 173. Rothwell PM, Wilson M, Price JF, et al. Effect of daily aspirin on risk of cancer  
22 metastasis: a study of incident cancers during randomised controlled trials. *Lancet*  
23 (London, England) 2012;379(9826):1591-601.  
24  
25  
26  
27  
28  
29  
30 174. Schadendorf D, Hodi FS, Robert C, et al. Pooled Analysis of Long-Term Survival Data  
31 From Phase II and Phase III Trials of Ipilimumab in Unresectable or Metastatic  
32 Melanoma. *Journal of clinical oncology : official journal of the American Society of*  
33  
34  
35  
36  
37  
38  
39  
40 175. Schmid D, Leitzmann MF. Television viewing and time spent sedentary in relation  
41 to cancer risk: a meta-analysis. *Journal of the National Cancer Institute* 2014;106(7).  
42  
43  
44  
45  
46 176. Schmoll HJ, Twelves C, Sun W, et al. Effect of adjuvant capecitabine or fluorouracil,  
47 with or without oxaliplatin, on survival outcomes in stage III colon cancer and the effect  
48 of oxaliplatin on post-relapse survival: a pooled analysis of individual patient data from  
49 four randomised controlled trials. *The Lancet Oncology* 2014;15(13):1481-92.  
50  
51  
52  
53  
54  
55  
56 177. Schottker B, Jorde R, Peasey A, et al. Vitamin D and mortality: meta-analysis of  
57 individual participant data from a large consortium of cohort studies from Europe and  
58 the United States. *BMJ (Clinical research ed)* 2014;348:g3656.  
59  
60

1  
2  
3 178. Schutz FA, Je Y, Richards CJ, et al. Meta-analysis of randomized controlled trials for  
4 the incidence and risk of treatment-related mortality in patients with cancer treated  
5 with vascular endothelial growth factor tyrosine kinase inhibitors. *Journal of clinical*  
6  
7  
8  
9  
10  
11  
12  
13 7.

14  
15  
16 179. Seng S, Liu Z, Chiu SK, et al. Risk of venous thromboembolism in patients with  
17  
18  
19  
20  
21  
22  
23 2012;30(35):4416-26.

24  
25  
26 180. Shaikh F, Dupuis LL, Alexander S, et al. Cardioprotection and Second Malignant  
27  
28  
29  
30  
31  
32  
33  
34  
35  
36  
37  
38  
39  
40  
41  
42  
43  
44  
45  
46  
47  
48  
49  
50  
51  
52  
53  
54  
55  
56  
57  
58  
59  
60

180. Shaikh F, Dupuis LL, Alexander S, et al. Cardioprotection and Second Malignant  
Neoplasms Associated With Dexrazoxane in Children Receiving Anthracycline  
Chemotherapy: A Systematic Review and Meta-Analysis. *Journal of the National Cancer  
Institute* 2016;108(4).

181. Sheinfeld Gorin S, Krebs P, Badr H, et al. Meta-analysis of psychosocial interventions  
to reduce pain in patients with cancer. *Journal of clinical oncology : official journal of the  
American Society of Clinical Oncology* 2012;30(5):539-47.

182. Sjoquist KM, Burmeister BH, Smithers BM, et al. Survival after neoadjuvant  
chemotherapy or chemoradiotherapy for resectable oesophageal carcinoma: an updated  
meta-analysis. *The Lancet Oncology* 2011;12(7):681-92.

183. Skoetz N, Trelle S, Rancea M, et al. Effect of initial treatment strategy on survival of  
patients with advanced-stage Hodgkin's lymphoma: a systematic review and network  
meta-analysis. *The Lancet Oncology* 2013;14(10):943-52.

1  
2  
3 184. Sonneveld P, Goldschmidt H, Rosinol L, et al. Bortezomib-based versus  
4 nonbortezomib-based induction treatment before autologous stem-cell transplantation  
5 in patients with previously untreated multiple myeloma: a meta-analysis of phase III  
6 randomized, controlled trials. *Journal of clinical oncology : official journal of the*  
7  
8  
9  
10  
11  
12  
13  
14  
15  
16  
17  
18  
19  
20  
21  
22  
23  
24  
25  
26  
27  
28  
29  
30  
31  
32  
33  
34  
35  
36  
37  
38  
39  
40  
41  
42  
43  
44  
45  
46  
47  
48  
49  
50  
51  
52  
53  
54  
55  
56  
57  
58  
59  
60

184. Sonneveld P, Goldschmidt H, Rosinol L, et al. Bortezomib-based versus nonbortezomib-based induction treatment before autologous stem-cell transplantation in patients with previously untreated multiple myeloma: a meta-analysis of phase III randomized, controlled trials. *Journal of clinical oncology : official journal of the American Society of Clinical Oncology* 2013;31(26):3279-87.

185. Spratt DE, Gordon Spratt EA, Wu S, et al. Efficacy of skin-directed therapy for cutaneous metastases from advanced cancer: a meta-analysis. *Journal of clinical oncology : official journal of the American Society of Clinical Oncology* 2014;32(28):3144-55.

186. Tang V, Boscardin WJ, Stijacic-Cenzer I, et al. Time to benefit for colorectal cancer screening: survival meta-analysis of flexible sigmoidoscopy trials. *BMJ (Clinical research ed)* 2015;350:h1662.

187. Templeton AJ, McNamara MG, Seruga B, et al. Prognostic role of neutrophil-to-lymphocyte ratio in solid tumors: a systematic review and meta-analysis. *Journal of the National Cancer Institute* 2014;106(6):dju124.

188. Teulings HE, Limpens J, Jansen SN, et al. Vitiligo-like depigmentation in patients with stage III-IV melanoma receiving immunotherapy and its association with survival: a systematic review and meta-analysis. *Journal of clinical oncology : official journal of the American Society of Clinical Oncology* 2015;33(7):773-81.

189. Theodoratou E, Montazeri Z, Hawken S, et al. Systematic meta-analyses and field synopsis of genetic association studies in colorectal cancer. *Journal of the National Cancer Institute* 2012;104(19):1433-57.

- 1  
2  
3 190. Thosani N, Thosani SN, Kumar S, et al. Reduced risk of colorectal cancer with use of  
4 oral bisphosphonates: a systematic review and meta-analysis. *Journal of clinical*  
5  
6 oncology : official journal of the American Society of Clinical Oncology 2013;31(5):623-  
7  
8 30.  
9  
10  
11  
12  
13 191. Trabert B, Ness RB, Lo-Ciganic WH, et al. Aspirin, nonaspirin nonsteroidal anti-  
14  
15 inflammatory drug, and acetaminophen use and risk of invasive epithelial ovarian  
16  
17 cancer: a pooled analysis in the Ovarian Cancer Association Consortium. *Journal of the*  
18  
19 National Cancer Institute 2014;106(2):djt431.  
20  
21  
22  
23 192. Tsilidis KK, Kasimis JC, Lopez DS, et al. Type 2 diabetes and cancer: umbrella review  
24  
25 of meta-analyses of observational studies. *BMJ (Clinical research ed)* 2015;350:g7607.  
26  
27  
28  
29 193. Vale CL, Burdett S, Ryzewska LH, et al. Addition of docetaxel or bisphosphonates  
30  
31 to standard of care in men with localised or metastatic, hormone-sensitive prostate  
32  
33 cancer: a systematic review and meta-analyses of aggregate data. *The Lancet Oncology*  
34  
35 2016;17(2):243-56.  
36  
37  
38  
39 194. Valery PC, Moore SP, Meiklejohn J, et al. International variations in childhood  
40  
41 cancer in indigenous populations: a systematic review. *The Lancet Oncology*  
42  
43 2014;15(2):e90-e103.  
44  
45  
46  
47 195. Valsecchi ME, Silbermins D, de Rosa N, et al. Lymphatic mapping and sentinel lymph  
48  
49 node biopsy in patients with melanoma: a meta-analysis. *Journal of clinical oncology :*  
50  
51 official journal of the American Society of Clinical Oncology 2011;29(11):1479-87.  
52  
53  
54  
55 196. van der Pas MH, Meijer S, Hoekstra OS, et al. Sentinel-lymph-node procedure in  
56  
57 colon and rectal cancer: a systematic review and meta-analysis. *The Lancet Oncology*  
58  
59 2011;12(6):540-50.  
60



- 1  
2  
3 197. Vera-Badillo FE, Templeton AJ, de Gouveia P, et al. Androgen receptor expression  
4 and outcomes in early breast cancer: a systematic review and meta-analysis. *Journal of*  
5  
6 the National Cancer Institute 2014;106(1):djt319.  
7  
8  
9  
10  
11 198. Vidal L, Gafter-Gvili A, Salles G, et al. Rituximab maintenance for the treatment of  
12  
13 patients with follicular lymphoma: an updated systematic review and meta-analysis of  
14  
15 randomized trials. *Journal of the National Cancer Institute* 2011;103(23):1799-806.  
16  
17  
18  
19 199. Violette PD, Agoritsas T, Alexander P, et al. Decision aids for localized prostate  
20  
21 cancer treatment choice: Systematic review and meta-analysis. *CA: a cancer journal for*  
22  
23 clinicians 2015;65(3):239-51.  
24  
25  
26  
27 200. Vollset SE, Clarke R, Lewington S, et al. Effects of folic acid supplementation on  
28  
29 overall and site-specific cancer incidence during the randomised trials: meta-analyses of  
30  
31 data on 50,000 individuals. *Lancet (London, England)* 2013;381(9871):1029-36.  
32  
33  
34  
35 201. Vora A, Andreano A, Pui CH, et al. Influence of Cranial Radiotherapy on Outcome in  
36  
37 Children With Acute Lymphoblastic Leukemia Treated With Contemporary Therapy.  
38  
39 *Journal of clinical oncology : official journal of the American Society of Clinical Oncology*  
40  
41 2016.  
42  
43  
44  
45 202. Waldron L, Haibe-Kains B, Culhane AC, et al. Comparative meta-analysis of  
46  
47 prognostic gene signatures for late-stage ovarian cancer. *Journal of the National Cancer*  
48  
49 *Institute* 2014;106(5).  
50  
51  
52  
53 203. Wang HT, Yao YH, Li BG, et al. Neuroendocrine Prostate Cancer (NEPC) progressing  
54  
55 from conventional prostatic adenocarcinoma: factors associated with time to  
56  
57 development of NEPC and survival from NEPC diagnosis-a systematic review and pooled  
58  
59  
60

1  
2  
3 analysis. Journal of clinical oncology : official journal of the American Society of Clinical  
4  
5 Oncology 2014;32(30):3383-90.  
6  
7

8  
9 204. Wang SY, Chu H, Shamliyan T, et al. Network meta-analysis of margin threshold for  
10  
11 women with ductal carcinoma in situ. Journal of the National Cancer Institute  
12  
13 2012;104(7):507-16.  
14  
15

16  
17 205. Wang X, Ouyang Y, Liu J, et al. Fruit and vegetable consumption and mortality from  
18  
19 all causes, cardiovascular disease, and cancer: systematic review and dose-response  
20  
21 meta-analysis of prospective cohort studies. BMJ (Clinical research ed) 2014;349:g4490.  
22  
23

24  
25 206. Wang Y, Yang F, Shen Y, et al. Maintenance Therapy With Immunomodulatory  
26  
27 Drugs in Multiple Myeloma: A Meta-Analysis and Systematic Review. Journal of the  
28  
29 National Cancer Institute 2016;108(3).  
30  
31

32  
33 207. Wehner MR, Shive ML, Chren MM, et al. Indoor tanning and non-melanoma skin  
34  
35 cancer: systematic review and meta-analysis. BMJ (Clinical research ed)  
36  
37 2012;345:e5909.  
38  
39

40  
41 208. Winter AC, Rice MS, Fortner RT, et al. Migraine and breast cancer risk: a prospective  
42  
43 cohort study and meta-analysis. Journal of the National Cancer Institute  
44  
45 2015;107(1):381.  
46  
47

48  
49 209. Xing Y, Bronstein Y, Ross MI, et al. Contemporary diagnostic imaging modalities for  
50  
51 the staging and surveillance of melanoma patients: a meta-analysis. Journal of the  
52  
53 National Cancer Institute 2011;103(2):129-42.  
54  
55

- 1  
2  
3 210. Yang XR, Chang-Claude J, Goode EL, et al. Associations of breast cancer risk factors  
4 with tumor subtypes: a pooled analysis from the Breast Cancer Association Consortium  
5 studies. *Journal of the National Cancer Institute* 2011;103(3):250-63.  
6  
7  
8  
9  
10  
11 211. Yothers G, Sargent DJ, Wolmark N, et al. Outcomes among black patients with stage  
12 II and III colon cancer receiving chemotherapy: an analysis of ACCENT adjuvant trials.  
13 *Journal of the National Cancer Institute* 2011;103(20):1498-506.  
14  
15  
16  
17  
18 212. Zhang B, Beeghly-Fadiel A, Long J, et al. Genetic variants associated with breast-  
19 cancer risk: comprehensive research synopsis, meta-analysis, and epidemiological  
20 evidence. *The Lancet Oncology* 2011;12(5):477-88.  
21  
22  
23  
24  
25  
26  
27 213. Zhang B, Shu XO, Delahanty RJ, et al. Height and Breast Cancer Risk: Evidence From  
28 Prospective Studies and Mendelian Randomization. *Journal of the National Cancer*  
29 *Institute* 2015;107(11).  
30  
31  
32  
33  
34  
35 214. Zhao FH, Lewkowitz AK, Chen F, et al. Pooled analysis of a self-sampling HPV DNA  
36 Test as a cervical cancer primary screening method. *Journal of the National Cancer*  
37 *Institute* 2012;104(3):178-88.  
38  
39  
40  
41  
42  
43 215. Zheng JS, Hu XJ, Zhao YM, et al. Intake of fish and marine n-3 polyunsaturated fatty  
44 acids and risk of breast cancer: meta-analysis of data from 21 independent prospective  
45 cohort studies. *BMJ (Clinical research ed)* 2013;346:f3706.  
46  
47  
48  
49  
50  
51  
52  
53  
54  
55  
56  
57  
58  
59  
60

1  
2  
3  
4  
5  
6  
7  
8  
9  
10  
11  
12  
13  
14  
15  
16  
17  
18  
19  
20  
21  
22  
23  
24  
25  
26  
27  
28  
29  
30  
31  
32  
33  
34  
35  
36  
37  
38  
39  
40  
41  
42  
43  
44  
45  
46  
47  
48  
49  
50  
51  
52  
53  
54  
55  
56  
57  
58  
59  
60

For peer review only



# PRISMA 2009 Checklist

| Section/topic                      | #  | Checklist item                                                                                                                                                                                                                                                                                              | Reported on page # |
|------------------------------------|----|-------------------------------------------------------------------------------------------------------------------------------------------------------------------------------------------------------------------------------------------------------------------------------------------------------------|--------------------|
| <b>TITLE</b>                       |    |                                                                                                                                                                                                                                                                                                             |                    |
| Title                              | 1  | Identify the report as a systematic review, meta-analysis, or both.                                                                                                                                                                                                                                         | 1                  |
| <b>ABSTRACT</b>                    |    |                                                                                                                                                                                                                                                                                                             |                    |
| Structured summary                 | 2  | Provide a structured summary including, as applicable: background; objectives; data sources; study eligibility criteria, participants, and interventions; study appraisal and synthesis methods; results; limitations; conclusions and implications of key findings; systematic review registration number. | 2-3                |
| <b>INTRODUCTION</b>                |    |                                                                                                                                                                                                                                                                                                             |                    |
| Rationale                          | 3  | Describe the rationale for the review in the context of what is already known.                                                                                                                                                                                                                              | 4                  |
| Objectives                         | 4  | Provide an explicit statement of questions being addressed with reference to participants, interventions, comparisons, outcomes, and study design (PICOS).                                                                                                                                                  | 4                  |
| <b>METHODS</b>                     |    |                                                                                                                                                                                                                                                                                                             |                    |
| Protocol and registration          | 5  | Indicate if a review protocol exists, if and where it can be accessed (e.g., Web address), and, if available, provide registration information including registration number.                                                                                                                               | 5                  |
| Eligibility criteria               | 6  | Specify study characteristics (e.g., PICOS, length of follow-up) and report characteristics (e.g., years considered, language, publication status) used as criteria for eligibility, giving rationale.                                                                                                      | 5                  |
| Information sources                | 7  | Describe all information sources (e.g., databases with dates of coverage, contact with study authors to identify additional studies) in the search and date last searched.                                                                                                                                  | 6                  |
| Search                             | 8  | Present full electronic search strategy for at least one database, including any limits used, such that it could be repeated.                                                                                                                                                                               | 6 and Appendix     |
| Study selection                    | 9  | State the process for selecting studies (i.e., screening, eligibility, included in systematic review, and, if applicable, included in the meta-analysis).                                                                                                                                                   | 6                  |
| Data collection process            | 10 | Describe method of data extraction from reports (e.g., piloted forms, independently, in duplicate) and any processes for obtaining and confirming data from investigators.                                                                                                                                  | 7                  |
| Data items                         | 11 | List and define all variables for which data were sought (e.g., PICOS, funding sources) and any assumptions and simplifications made.                                                                                                                                                                       | 7                  |
| Risk of bias in individual studies | 12 | Describe methods used for assessing risk of bias of individual studies (including specification of whether this was done at the study or outcome level), and how this information is to be used in any data synthesis.                                                                                      | 7-8                |
| Summary measures                   | 13 | State the principal summary measures (e.g., risk ratio, difference in means).                                                                                                                                                                                                                               | 8                  |
| Synthesis of results               | 14 | Describe the methods of handling data and combining results of studies, if done, including measures of consistency (e.g., $I^2$ ) for each meta-analysis.                                                                                                                                                   | 8                  |

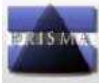

# PRISMA 2009 Checklist

1  
2  
3  
4  
5  
6  
7  
8  
9  
10  
11  
12  
13  
14  
15  
16  
17  
18  
19  
20  
21  
22  
23  
24  
25  
26  
27  
28  
29  
30  
31  
32  
33  
34  
35  
36  
37  
38  
39  
40  
41  
42  
43  
44  
45  
46  
47

| Section/topic                 | #  | Checklist item                                                                                                                                                                                           | Reported on page #   |
|-------------------------------|----|----------------------------------------------------------------------------------------------------------------------------------------------------------------------------------------------------------|----------------------|
| Risk of bias across studies   | 15 | Specify any assessment of risk of bias that may affect the cumulative evidence (e.g., publication bias, selective reporting within studies).                                                             | NA                   |
| Additional analyses           | 16 | Describe methods of additional analyses (e.g., sensitivity or subgroup analyses, meta-regression), if done, indicating which were pre-specified.                                                         | NA                   |
| <b>RESULTS</b>                |    |                                                                                                                                                                                                          |                      |
| Study selection               | 17 | Give numbers of studies screened, assessed for eligibility, and included in the review, with reasons for exclusions at each stage, ideally with a flow diagram.                                          | 9 and flow diagrams  |
| Study characteristics         | 18 | For each study, present characteristics for which data were extracted (e.g., study size, PICOS, follow-up period) and provide the citations.                                                             | NA                   |
| Risk of bias within studies   | 19 | Present data on risk of bias of each study and, if available, any outcome level assessment (see item 12).                                                                                                | NA                   |
| Results of individual studies | 20 | For all outcomes considered (benefits or harms), present, for each study: (a) simple summary data for each intervention group (b) effect estimates and confidence intervals, ideally with a forest plot. | 9-12 and forest plot |
| Synthesis of results          | 21 | Present results of each meta-analysis done, including confidence intervals and measures of consistency.                                                                                                  | NA                   |
| Risk of bias across studies   | 22 | Present results of any assessment of risk of bias across studies (see Item 15).                                                                                                                          | NA                   |
| Additional analysis           | 23 | Give results of additional analyses, if done (e.g., sensitivity or subgroup analyses, meta-regression [see Item 16]).                                                                                    | NA                   |
| <b>DISCUSSION</b>             |    |                                                                                                                                                                                                          |                      |
| Summary of evidence           | 24 | Summarize the main findings including the strength of evidence for each main outcome; consider their relevance to key groups (e.g., healthcare providers, users, and policy makers).                     | 13-16                |
| Limitations                   | 25 | Discuss limitations at study and outcome level (e.g., risk of bias), and at review-level (e.g., incomplete retrieval of identified research, reporting bias).                                            | 13-14                |
| Conclusions                   | 26 | Provide a general interpretation of the results in the context of other evidence, and implications for future research.                                                                                  | 15-16                |
| <b>FUNDING</b>                |    |                                                                                                                                                                                                          |                      |
| Funding                       | 27 | Describe sources of funding for the systematic review and other support (e.g., supply of data); role of funders for the systematic review.                                                               | 18                   |

From: Moher D, Liberati A, Tetzlaff J, Altman DG, The PRISMA Group (2009). Preferred Reporting Items for Systematic Reviews and Meta-Analyses: The PRISMA Statement. PLoS Med 6(7): e1000097. doi:10.1371/journal.pmed1000097

For peer review only - <http://bmjopen.bmj.com/site/about/guidelines.xhtml>

For more information, visit: [www.prisma-statement.org](http://www.prisma-statement.org)



# PRISMA 2009 Checklist

For peer review only

1  
2  
3  
4  
5  
6  
7  
8  
9  
10  
11  
12  
13  
14  
15  
16  
17  
18  
19  
20  
21  
22  
23  
24  
25  
26  
27  
28  
29  
30  
31  
32  
33  
34  
35  
36  
37  
38  
39  
40  
41  
42  
43  
44  
45  
46  
47
