# Supplementary material for: A systematic assessment of Cochrane reviews and systematic reviews published in high-impact medical journals related to cancer
Source: PubMed Central journal article supplement — BMJ Open. 2018 Mar 25;8(3):e020869. doi: 10.1136/bmjopen-2017-020869 (PMC5875625; doi:10.1136/bmjopen-2017-020869), 2018-03-25
Supplement: bmjopen-2017-020869supp001.pdf [file bmjopen-2017-020869supp001.pdf]

**Appendix**

**Appendix table 1: Search strategy for high-impact journals SRs**

| <b>Search</b>                                                                                                                                                                                                                                                                                                                                                                                                                                                                                                                                                                                                                                                                                                                                                                               |
|---------------------------------------------------------------------------------------------------------------------------------------------------------------------------------------------------------------------------------------------------------------------------------------------------------------------------------------------------------------------------------------------------------------------------------------------------------------------------------------------------------------------------------------------------------------------------------------------------------------------------------------------------------------------------------------------------------------------------------------------------------------------------------------------|
| <p><a href="#">#1</a> Search (((((((((((((((("Cancer Research"[Journal]) OR "Ca-A Cancer Journal for Clinicians"[Journal]) OR "Nature reviews. Clinical oncology"[Journal]) OR "Clinical cancer research : an official journal of the American Association for Cancer Research"[Journal]) OR)) OR (((("BMJ (Clinical research ed.)"[Journal]) OR "The Lancet. Oncology"[Journal]) OR "JAMA"[Journal]) OR "The New England journal of medicine"[Journal]) OR "Journal of clinical oncology : official journal of the American Society of Clinical Oncology"[Journal]) OR "Annals of oncology : official journal of the European Society for Medical Oncology / ESMO"[Journal]) OR "Journal of the National Cancer Institute"[Journal]) OR "Lancet (London, England)"[Journal])]]]]]]]]))</p> |
| <p><a href="#">#2</a> Search (((((((((((((((((((((((((((((((((((((NEOPLASMS BY HISTOLOGIC TYPE[MeSH Terms]) OR NEOPLASMS BY SITE[MeSH Terms]) OR neoplas*) OR tumor*) OR tumour*) OR ((Krebs* or cancer*)) OR malignan*) OR ((carcino* or karzino* or karzinom*)) OR sarcom*) OR (leukem* or leukaem*) OR lymphom*) OR melano*) OR metastas*) OR ((mesothelio* or mesotelio*)) OR carcinomatos*) OR ((gliom* or glioblastom*)) OR osteo*sarcom*) OR ((blastom* or neuroblastom*))]]]]]]]]]]]]]]]]))</p>                                                                                                                                                                                                                                                                                     |
| <p><a href="#">#3</a> Search ((((((systematic review[Title/Abstract]) OR (((((meta-analys*[Title/Abstract]) OR metaanalys*[Title/Abstract])]]]]))))</p>                                                                                                                                                                                                                                                                                                                                                                                                                                                                                                                                                                                                                                     |
| <p><a href="#">#4</a> Search ((#1 and #2 and #3))</p>                                                                                                                                                                                                                                                                                                                                                                                                                                                                                                                                                                                                                                                                                                                                       |
| <p><a href="#">#5</a> Search (#1 and #2) Filters: Meta-Analysis; Systematic Reviews</p>                                                                                                                                                                                                                                                                                                                                                                                                                                                                                                                                                                                                                                                                                                     |

[#6](#) Search (#4 or #7) Filters: Publication date from 2011/01/01 to 2016/05/31

---

---

**Appendix table 2: Extracted items**

| Item | Extracted                      | Example                                                                                                                                                                                                                                           |
|------|--------------------------------|---------------------------------------------------------------------------------------------------------------------------------------------------------------------------------------------------------------------------------------------------|
| 1.   | Author                         |                                                                                                                                                                                                                                                   |
| 2.   | Title                          |                                                                                                                                                                                                                                                   |
| 3.   | Journal                        | Cochrane, A Cancer Journal for Clinicians, New England Journal of Medicine, The Lancet, JAMA, Lancet Oncology, Journal of Clinical Oncology, The BMJ, Nature Reviews Clinical Oncology, Journal of the National Cancer Institute, Cancer Research |
| 4.   | Year last updated              | 2011-2016                                                                                                                                                                                                                                         |
| 5.   | Year first published           | 2011-2016                                                                                                                                                                                                                                         |
| 6.   | Cochrane group                 |                                                                                                                                                                                                                                                   |
| 7.   | Region of corresponding author | Africa, Asia, Australia/ New Zealand, Europe, North America, South America                                                                                                                                                                        |
| 8.   | Review type                    | SR based on trial-level data, Individual Patient Data SR, Both                                                                                                                                                                                    |
| 9.   | Network Meta-Analysis          | Yes, No                                                                                                                                                                                                                                           |
| 10.  | Included study type            | RCTs, non-RCTs, Both                                                                                                                                                                                                                              |
| 11.  | Question type                  | Diagnosis, Epidemiology, Prevention,                                                                                                                                                                                                              |

| Item | Extracted                  | Example                                                                                                                                                                                                                                                                                                                                 |
|------|----------------------------|-----------------------------------------------------------------------------------------------------------------------------------------------------------------------------------------------------------------------------------------------------------------------------------------------------------------------------------------|
|      |                            | Prognosis, Screening, Therapy                                                                                                                                                                                                                                                                                                           |
| 12.  | Disease                    | Bladder, bones (incl. spine), brain (incl. CNS), breast, cancer in general, cervical, colorectal, endometrial, oesophagus, gastric, haematological (leukaemia, lymphoma, myeloma), head and neck, lung, melanoma, mixed (but not general, other (e.g. male breast cancer, liver metastases), ovarian, pancreas, prostate, renal, uterus |
| 13.  | Intervention               | Behavioural (e.g. exercise, diet, smoking), chemotherapy, mixed interventions, “new drug” (targeted therapy and monoclonal antibodies), radiotherapy, supportive, surgery, thermal (e.g. hyperthermia, cryotherapy), not applicable (if diagnostic, prognostic, preventive, epidemiologic, screening)                                   |
| 14.  | Population                 | Adult, paediatric, both                                                                                                                                                                                                                                                                                                                 |
| 15.  | Number of included studies | <hr/>                                                                                                                                                                                                                                                                                                                                   |
| 16.  | Number included patients   | <hr/>                                                                                                                                                                                                                                                                                                                                   |

**Appendix table 3: Extracted quality indicators**

| Item | AMSTAR                                                                               | This work                                                                                    |
|------|--------------------------------------------------------------------------------------|----------------------------------------------------------------------------------------------|
| 1.   | Was an 'a priori' design provided                                                    | Was the review question established before the conduct of the review?                        |
|      |                                                                                      | Were the in- and exclusion criteria defined before the conduct of the review?                |
| 2.   | Was there duplicate study selection and data extraction?                             | Was the study selection and data-extraction undertaken by two independently working authors? |
|      |                                                                                      | Was the consensus procedure described?                                                       |
|      |                                                                                      | Was the interobserver-agreement (quantitatively) assessed?                                   |
| 3.   | Was a comprehensive literature search performed?                                     | Were at least two electronic databases searched?                                             |
|      |                                                                                      | Were the years included in the searches reported?                                            |
|      |                                                                                      | Were the database searches supported by other sources?                                       |
| 4.   | Was the status of publication (i.e. grey literature) used as an inclusion criterion? | Were reviews irrespective of publication status included?                                    |
|      |                                                                                      | Were reviews in languages other than English                                                 |

| Item | AMSTAR                                                                                            | This work                                                                                                                             |
|------|---------------------------------------------------------------------------------------------------|---------------------------------------------------------------------------------------------------------------------------------------|
|      |                                                                                                   | included?                                                                                                                             |
| 5.   | Was a list of studies (included and excluded) provided?                                           | Was a list of included studies provided?                                                                                              |
|      |                                                                                                   | Was a list of excluded studies provided?                                                                                              |
| 6.   | Were the characteristics of the included studies provided?                                        | Were study characteristic of every included study included?                                                                           |
| 7.   | Was the scientific quality of the included studies assessed and documented?                       | Was the quality of included studies included by available tools<br><br>(e.g. Cochrane's Risk of Bias, ROBINS, Newcastle-Ottawa scale) |
| 8.   | Was the scientific quality of the included studies used appropriately in formulating conclusions? | If a Meta-analysis was performed: Was the study quality included into the analysis via sensitivity- or subgroup analysis?             |
| 9.   | Were the methods used to combine the findings of studies appropriate?                             | Was possible heterogeneity assessed?                                                                                                  |
| 10.  | Was the likelihood of publication bias assessed?                                                  | Was possible publication bias formally assessed?                                                                                      |
| 11.  | Was the conflict of interest included?                                                            | Were possible Conflicts of Interest regarding the review disclosed?                                                                   |

| <b>Item</b> | <b>AMSTAR</b> | <b>This work</b>                                                      |
|-------------|---------------|-----------------------------------------------------------------------|
|             |               | Were possible Conflicts of Interest of the included studies reported? |

## References

### References of assessed reviews

#### *Cochrane reviews*

1. Abdel-Rahman Omar M, Elsayed Z. Yttrium-90 microsphere radioembolisation for unresectable hepatocellular carcinoma. Cochrane Database of Systematic Reviews 2016; (2).  
<http://onlinelibrary.wiley.com/doi/10.1002/14651858.CD011313.pub2/abstract>.
2. Abdul Razak Albiruni R, Li L, Bryant A, et al. Chemotherapy for malignant germ cell ovarian cancer in adult patients with early stage, advanced and recurrent disease. Cochrane Database of Systematic Reviews 2011; (3).  
<http://onlinelibrary.wiley.com/doi/10.1002/14651858.CD007584.pub2/abstract>.
3. Aghoram R, Cai P, Dickinson James A. Alpha-foetoprotein and/or liver ultrasonography for screening of hepatocellular carcinoma in patients with chronic hepatitis B. Cochrane Database of Systematic Reviews 2012; (9).  
<http://onlinelibrary.wiley.com/doi/10.1002/14651858.CD002799.pub2/abstract>.
4. Akl Elie A, Kahale L, Terrenato I, et al. Oral anticoagulation in patients with cancer who have no therapeutic or prophylactic indication for anticoagulation. Cochrane Database of Systematic Reviews 2014; (7).  
<http://onlinelibrary.wiley.com/doi/10.1002/14651858.CD006466.pub5/abstract>.



5. Akl Elie A, Kahale Lara A, Ballout Rami A, et al. Parenteral anticoagulation in ambulatory patients with cancer. Cochrane Database of Systematic Reviews 2014; (12).  
<http://onlinelibrary.wiley.com/doi/10.1002/14651858.CD006652.pub4/abstract>.
6. Akl Elie A, Kahale Lara A, Barba M, et al. Anticoagulation for the long-term treatment of venous thromboembolism in patients with cancer. Cochrane Database of Systematic Reviews 2014; (7).  
<http://onlinelibrary.wiley.com/doi/10.1002/14651858.CD006650.pub4/abstract>.
7. Akl Elie A, Kahale Lara A, Neumann I, et al. Anticoagulation for the initial treatment of venous thromboembolism in patients with cancer. Cochrane Database of Systematic Reviews 2014; (6).  
<http://onlinelibrary.wiley.com/doi/10.1002/14651858.CD006649.pub6/abstract>.
8. Akl Elie A, Kahale Lara A, Sperati F, et al. Low molecular weight heparin versus unfractionated heparin for perioperative thromboprophylaxis in patients with cancer. Cochrane Database of Systematic Reviews 2014; (6).  
<http://onlinelibrary.wiley.com/doi/10.1002/14651858.CD009447.pub2/abstract>.
9. Akl Elie A, Ramly Elie P, Kahale Lara A, et al. Anticoagulation for people with cancer and central venous catheters. Cochrane Database of Systematic Reviews 2014; (10).  
<http://onlinelibrary.wiley.com/doi/10.1002/14651858.CD006468.pub5/abstract>.

10. Al Rawahi T, Lopes Alberto D, Bristow Robert E, et al. Surgical cytoreduction for recurrent epithelial ovarian cancer. Cochrane Database of Systematic Reviews 2013; (2).  
<http://onlinelibrary.wiley.com/doi/10.1002/14651858.CD008765.pub3/abstract>
11. Alazzam Mi, Tidy J, Osborne R, et al. Chemotherapy for resistant or recurrent gestational trophoblastic neoplasia. Cochrane Database of Systematic Reviews 2016; (1).  
<http://onlinelibrary.wiley.com/doi/10.1002/14651858.CD008891.pub3/abstract>
12. Amarasena Isuru U, Chatterjee S, Walters Julia AE, et al. Platinum versus non-platinum chemotherapy regimens for small cell lung cancer. Cochrane Database of Systematic Reviews 2015; (8).  
<http://onlinelibrary.wiley.com/doi/10.1002/14651858.CD006849.pub3/abstract>
13. Ang C, Bryant A, Barton Desmond PJ, et al. Exenterative surgery for recurrent gynaecological malignancies. Cochrane Database of Systematic Reviews 2014; (2).  
<http://onlinelibrary.wiley.com/doi/10.1002/14651858.CD010449.pub2/abstract>
14. Ang C, Chan Karen KL, Bryant A, et al. Ultra-radical (extensive) surgery versus standard surgery for the primary cytoreduction of advanced epithelial ovarian cancer. Cochrane Database of Systematic Reviews 2011; (4).  
<http://onlinelibrary.wiley.com/doi/10.1002/14651858.CD007697.pub2/abstract>

15. Anglemeyer A, Agrawal Anurag K, Rutherford George W. Treatment of Kaposi sarcoma in children with HIV-1 infection. Cochrane Database of Systematic Reviews 2014; (1).  
<http://onlinelibrary.wiley.com/doi/10.1002/14651858.CD009826.pub2/abstract>
16. Arbyn M, Roelens J, Simoens C, et al. Human papillomavirus testing versus repeat cytology for triage of minor cytological cervical lesions. Cochrane Database of Systematic Reviews 2013; (3).  
<http://onlinelibrary.wiley.com/doi/10.1002/14651858.CD008054.pub2/abstract>
17. Archampong D, Borowski D, Wille-Jørgensen P, et al. Workload and surgeon's specialty for outcome after colorectal cancer surgery. Cochrane Database of Systematic Reviews 2012; (3).  
<http://onlinelibrary.wiley.com/doi/10.1002/14651858.CD005391.pub3/abstract>
18. Arcidiacono Paolo G, Calori G, Carrara S, et al. Celiac plexus block for pancreatic cancer pain in adults. Cochrane Database of Systematic Reviews 2011; (3).  
<http://onlinelibrary.wiley.com/doi/10.1002/14651858.CD007519.pub2/abstract>
19. Baalbergen A, Veenstra Y, Stalpers L. Primary surgery versus primary radiotherapy with or without chemotherapy for early adenocarcinoma of the uterine cervix. Cochrane Database of Systematic Reviews 2013; (1).  
<http://onlinelibrary.wiley.com/doi/10.1002/14651858.CD006248.pub3/abstract>

20. Bala Malgorzata M, Riemsma Robert P, Wolff R, et al. Microwave coagulation for liver metastases. Cochrane Database of Systematic Reviews 2013; (10).  
<http://onlinelibrary.wiley.com/doi/10.1002/14651858.CD010163.pub2/abstract>
21. Bala Malgorzata M, Riemsma Robert P, Wolff R, et al. Cryotherapy for liver metastases. Cochrane Database of Systematic Reviews 2013; (6).  
<http://onlinelibrary.wiley.com/doi/10.1002/14651858.CD009058.pub2/abstract>
22. Balduzzi S, Mantarro S, Guarneri V, et al. Trastuzumab-containing regimens for metastatic breast cancer. Cochrane Database of Systematic Reviews 2014; (6).  
<http://onlinelibrary.wiley.com/doi/10.1002/14651858.CD006242.pub2/abstract>
23. Barone Damiano G, Lawrie Theresa A, Hart Michael G. Image guided surgery for the resection of brain tumours. Cochrane Database of Systematic Reviews 2014; (1).  
<http://onlinelibrary.wiley.com/doi/10.1002/14651858.CD009685.pub2/abstract>
24. Bath-Hextall Fiona J, Matin Rubeta N, Wilkinson D, et al. Interventions for cutaneous Bowen's disease. Cochrane Database of Systematic Reviews 2013; (6).  
<http://onlinelibrary.wiley.com/doi/10.1002/14651858.CD007281.pub2/abstract>
25. Bauer K, Rancea M, Roloff V, et al. Rituximab, ofatumumab and other monoclonal anti-CD20 antibodies for chronic lymphocytic leukaemia. Cochrane Database of Systematic Reviews 2012; (11).  
<http://onlinelibrary.wiley.com/doi/10.1002/14651858.CD008079.pub2/abstract>

26. Bauer K, Skoetz N, Monsef I, et al. Comparison of first-line chemotherapy including escalated BEACOPP versus chemotherapy including ABVD for people with early unfavourable or advanced stage Hodgkin lymphoma. Cochrane Database of Systematic Reviews 2011; (5).  
<http://onlinelibrary.wiley.com/doi/10.1002/14651858.CD007941.pub3/abstract>.
27. Bell Rae F, Eccleston C, Kalso Eija A. Ketamine as an adjuvant to opioids for cancer pain. Cochrane Database of Systematic Reviews 2012; (6).  
<http://onlinelibrary.wiley.com/doi/10.1002/14651858.CD003351.pub3/abstract>.
28. Bennett C, Green S, DeCaestecker J, et al. Surgery versus radical endotherapies for early cancer and high-grade dysplasia in Barrett's oesophagus. Cochrane Database of Systematic Reviews 2012; (11).  
<http://onlinelibrary.wiley.com/doi/10.1002/14651858.CD007334.pub4/abstract>.
29. Bennett Michael H, Feldmeier J, Smee R, et al. Hyperbaric oxygenation for tumour sensitisation to radiotherapy. Cochrane Database of Systematic Reviews 2012; (4).  
<http://onlinelibrary.wiley.com/doi/10.1002/14651858.CD005007.pub3/abstract>.
30. Bergenthal N, Will A, Streckmann F, et al. Aerobic physical exercise for adult patients with haematological malignancies. Cochrane Database of Systematic Reviews 2014; (11).  
<http://onlinelibrary.wiley.com/doi/10.1002/14651858.CD009075.pub2/abstract>.

31. Bergner N, Monsef I, Illerhaus G, et al. Role of chemotherapy additional to high-dose methotrexate for primary central nervous system lymphoma (PCNSL). Cochrane Database of Systematic Reviews 2012; (11).  
<http://onlinelibrary.wiley.com/doi/10.1002/14651858.CD009355.pub2/abstract>.
32. Bessell A, Glennon A-M, Furness S, et al. Interventions for the treatment of oral and oropharyngeal cancers: surgical treatment. Cochrane Database of Systematic Reviews 2011; (9).  
<http://onlinelibrary.wiley.com/doi/10.1002/14651858.CD006205.pub3/abstract>.
33. Best Lawrence MJ, Mughal M, Gurusamy Kurinchi S. Laparoscopic versus open gastrectomy for gastric cancer. Cochrane Database of Systematic Reviews 2016; (3).  
<http://onlinelibrary.wiley.com/doi/10.1002/14651858.CD011389.pub2/abstract>.
34. Best Lawrence MJ, Mughal M, Gurusamy Kurinchi S. Non-surgical versus surgical treatment for oesophageal cancer. Cochrane Database of Systematic Reviews 2016; (3).  
<http://onlinelibrary.wiley.com/doi/10.1002/14651858.CD011498.pub2/abstract>.
35. Billson Hazel A, Holland C, Curwell J, et al. Perioperative nutrition interventions for women with ovarian cancer. Cochrane Database of Systematic Reviews 2013; (9).  
<http://onlinelibrary.wiley.com/doi/10.1002/14651858.CD009884.pub2/abstract>.

36. Bjelakovic G, Gluud Lise L, Nikolova D, et al. Vitamin D supplementation for prevention of cancer in adults. Cochrane Database of Systematic Reviews 2014; (6).  
<http://onlinelibrary.wiley.com/doi/10.1002/14651858.CD007469.pub2/abstract>
37. Bleeker G, Tytgat Godelieve AM, Adam Judit A, et al. 123I-MIBG scintigraphy and 18F-FDG-PET imaging for diagnosing neuroblastoma. Cochrane Database of Systematic Reviews 2015; (9).  
<http://onlinelibrary.wiley.com/doi/10.1002/14651858.CD009263.pub2/abstract>
38. Bourke L, Homer Kate E, Thaha Mohamed A, et al. Interventions for promoting habitual exercise in people living with and beyond cancer. Cochrane Database of Systematic Reviews 2013; (9).  
<http://onlinelibrary.wiley.com/doi/10.1002/14651858.CD010192.pub2/abstract>
39. Braam Katja I, van der Torre P, Takken T, et al. Physical exercise training interventions for children and young adults during and after treatment for childhood cancer. Cochrane Database of Systematic Reviews 2016; (3).  
<http://onlinelibrary.wiley.com/doi/10.1002/14651858.CD008796.pub3/abstract>
40. Bradt J, Shim M, Goodill Sherry W. Dance/movement therapy for improving psychological and physical outcomes in cancer patients. Cochrane Database of Systematic Reviews 2015; (1).  
<http://onlinelibrary.wiley.com/doi/10.1002/14651858.CD007103.pub3/abstract>

41. Brockbank E, Kokka F, Bryant A, et al. Pre-treatment surgical para-aortic lymph node assessment in locally advanced cervical cancer. Cochrane Database of Systematic Reviews 2013; (3).  
<http://onlinelibrary.wiley.com/doi/10.1002/14651858.CD008217.pub3/abstract>.
42. Brocklehurst P, Kujan O, O'Malley Lucy A, et al. Screening programmes for the early detection and prevention of oral cancer. Cochrane Database of Systematic Reviews 2013; (11).  
<http://onlinelibrary.wiley.com/doi/10.1002/14651858.CD004150.pub4/abstract>.
43. Burdett S, Pignon Jean P, Tierney J, et al. Adjuvant chemotherapy for resected early-stage non-small cell lung cancer. Cochrane Database of Systematic Reviews 2015; (3). <http://onlinelibrary.wiley.com/doi/10.1002/14651858.CD011430/abstract>.
44. Cakmakkaya Ozlem S, Kolodzie K, Apfel Christian C, et al. Anaesthetic techniques for risk of malignant tumour recurrence. Cochrane Database of Systematic Reviews 2014; (11).  
<http://onlinelibrary.wiley.com/doi/10.1002/14651858.CD008877.pub2/abstract>.
45. Candy B, Jones L, Vickerstaff V, et al. Interventions for sexual dysfunction following treatments for cancer in women. Cochrane Database of Systematic Reviews 2016; (2).  
<http://onlinelibrary.wiley.com/doi/10.1002/14651858.CD005540.pub3/abstract>.
46. Carvalho Alan PV, Vital Flávia MR, Soares Bernardo GO. Exercise interventions for shoulder dysfunction in patients treated for head and neck cancer. Cochrane



Database of Systematic Reviews 2012; (4).

<http://onlinelibrary.wiley.com/doi/10.1002/14651858.CD008693.pub2/abstract>.

47. Cavalheri V, Tahirah F, Nonoyama Mika L, et al. Exercise training undertaken by people within 12 months of lung resection for non-small cell lung cancer.

Cochrane Database of Systematic Reviews 2013; (7).

<http://onlinelibrary.wiley.com/doi/10.1002/14651858.CD009955.pub2/abstract>.

48. Chan Benjamin KY, Wiseberg-Firtell Jill A, Jois Ramesh HS, et al. Localization techniques for guided surgical excision of non-palpable breast lesions. Cochrane Database of Systematic Reviews 2015; (12).

<http://onlinelibrary.wiley.com/doi/10.1002/14651858.CD009206.pub2/abstract>.

49. Chan Kelvin KW, Glenny A-M, Weldon Jo C, et al. Interventions for the treatment of oral and oropharyngeal cancers: targeted therapy and immunotherapy. Cochrane Database of Systematic Reviews 2015; (12).

<http://onlinelibrary.wiley.com/doi/10.1002/14651858.CD010341.pub2/abstract>.

50. Charoenkwan K, Kietpeerakool C. Retroperitoneal drainage versus no drainage after pelvic lymphadenectomy for the prevention of lymphocyst formation in women with gynaecological malignancies. Cochrane Database of Systematic Reviews 2016; (6).

<http://onlinelibrary.wiley.com/doi/10.1002/14651858.CD007387.pub4/abstract>.

51. Chen H, Li J, Cui T, et al. Adjuvant gonadotropin-releasing hormone analogues for the prevention of chemotherapy induced premature ovarian failure in premenopausal women. Cochrane Database of Systematic Reviews 2011; (11).  
<http://onlinelibrary.wiley.com/doi/10.1002/14651858.CD008018.pub2/abstract>.
52. Chen X, Deng L, Jiang X, et al. Chinese herbal medicine for oesophageal cancer. Cochrane Database of Systematic Reviews 2016; (1).  
<http://onlinelibrary.wiley.com/doi/10.1002/14651858.CD004520.pub7/abstract>.
53. Cheuk Daniel KL, Chiang Alan KS, Chan Godfrey CF, et al. Urate oxidase for the prevention and treatment of tumour lysis syndrome in children with cancer. Cochrane Database of Systematic Reviews 2014; (3).  
<http://onlinelibrary.wiley.com/doi/10.1002/14651858.CD006945.pub4/abstract>.
54. Cheuk Daniel KL, Chiang Alan KS, Lee Tsz L, et al. Vaccines for prophylaxis of viral infections in patients with hematological malignancies. Cochrane Database of Systematic Reviews 2011; (3).  
<http://onlinelibrary.wiley.com/doi/10.1002/14651858.CD006505.pub2/abstract>.
55. Cirocchi R, Trastulli S, Abraha I, et al. Non-resection versus resection for an asymptomatic primary tumour in patients with unresectable Stage IV colorectal cancer. Cochrane Database of Systematic Reviews 2012; (8).  
<http://onlinelibrary.wiley.com/doi/10.1002/14651858.CD008997.pub2/abstract>.

56. Cirocchi R, Trastulli S, Boselli C, et al. Radiofrequency ablation in the treatment of liver metastases from colorectal cancer. Cochrane Database of Systematic Reviews 2012; (6).  
<http://onlinelibrary.wiley.com/doi/10.1002/14651858.CD006317.pub3/abstract>.
57. Clarke T, Galaal K, Bryant A, et al. Evaluation of follow-up strategies for patients with epithelial ovarian cancer following completion of primary treatment. Cochrane Database of Systematic Reviews 2014; (9).  
<http://onlinelibrary.wiley.com/doi/10.1002/14651858.CD006119.pub3/abstract>.
58. Cortés-Jofré M, Rueda J-R, Corsini-Muñoz G, et al. Drugs for preventing lung cancer in healthy people. Cochrane Database of Systematic Reviews 2012; (10).  
<http://onlinelibrary.wiley.com/doi/10.1002/14651858.CD002141.pub2/abstract>.
59. Cousins Sarah E, Tempest E, Feuer David J. Surgery for the resolution of symptoms in malignant bowel obstruction in advanced gynaecological and gastrointestinal cancer. Cochrane Database of Systematic Reviews 2016; (1).  
<http://onlinelibrary.wiley.com/doi/10.1002/14651858.CD002764.pub2/abstract>.
60. Coyne I, O'Mathúna Dónal P, Gibson F, et al. Interventions for promoting participation in shared decision-making for children with cancer. Cochrane Database of Systematic Reviews 2016; (11).  
<http://onlinelibrary.wiley.com/doi/10.1002/14651858.CD008970.pub3/abstract>.

61. Cramp F, Byron-Daniel J. Exercise for the management of cancer-related fatigue in adults. Cochrane Database of Systematic Reviews 2012; (11).  
<http://onlinelibrary.wiley.com/doi/10.1002/14651858.CD006145.pub3/abstract>
62. Crighton Gemma L, Estcourt Lise J, Wood Erica M, et al. A therapeutic-only versus prophylactic platelet transfusion strategy for preventing bleeding in patients with haematological disorders after myelosuppressive chemotherapy or stem cell transplantation. Cochrane Database of Systematic Reviews 2015; (9).  
<http://onlinelibrary.wiley.com/doi/10.1002/14651858.CD010981.pub2/abstract>
63. Daly T, Hickey Brigid E, Lehman M, et al. Adjuvant radiotherapy following radical prostatectomy for prostate cancer. Cochrane Database of Systematic Reviews 2011; (12).  
<http://onlinelibrary.wiley.com/doi/10.1002/14651858.CD007234.pub2/abstract>
64. Day J, Yust-Katz S, Cachia D, et al. Interventions for the management of fatigue in adults with a primary brain tumour. Cochrane Database of Systematic Reviews 2016; (4).  
<http://onlinelibrary.wiley.com/doi/10.1002/14651858.CD011376.pub2/abstract>
65. Day J, Zienius K, Gehring K, et al. Interventions for preventing and ameliorating cognitive deficits in adults treated with cranial irradiation. Cochrane Database of Systematic Reviews 2014; (12).  
<http://onlinelibrary.wiley.com/doi/10.1002/14651858.CD011335.pub2/abstract>

66. de Boer Angela GEM, Taskila Tyna K, Tamminga Sietske J, et al. Interventions to enhance return-to-work for cancer patients. Cochrane Database of Systematic Reviews 2015; (9).  
<http://onlinelibrary.wiley.com/doi/10.1002/14651858.CD007569.pub3/abstract>.
67. De Caluwé L, Van Nieuwenhove Y, Ceelen Wim P. Preoperative chemoradiation versus radiation alone for stage II and III resectable rectal cancer. Cochrane Database of Systematic Reviews 2013; (2).  
<http://onlinelibrary.wiley.com/doi/10.1002/14651858.CD006041.pub3/abstract>.
68. de Castria Tiago B, da Silva Edina MK, Gois Aecio FT, et al. Cisplatin versus carboplatin in combination with third-generation drugs for advanced non-small cell lung cancer. Cochrane Database of Systematic Reviews 2013; (8).  
<http://onlinelibrary.wiley.com/doi/10.1002/14651858.CD009256.pub2/abstract>.
69. de Zwart V, Gouw Samantha C, Meyer-Wentrup Friederike AG. Antibody therapies for lymphoma in children. Cochrane Database of Systematic Reviews 2016; (1).  
<http://onlinelibrary.wiley.com/doi/10.1002/14651858.CD011181.pub2/abstract>.
70. Dear Rachel F, McGeechan K, Jenkins Marisa C, et al. Combination versus sequential single agent chemotherapy for metastatic breast cancer. Cochrane Database of Systematic Reviews 2013; (12).  
<http://onlinelibrary.wiley.com/doi/10.1002/14651858.CD008792.pub2/abstract>.

71. Deng L, Zhang J, Wu T, et al. Combination chemotherapy for primary treatment of high-risk gestational trophoblastic tumour. Cochrane Database of Systematic Reviews 2013; (1).  
<http://onlinelibrary.wiley.com/doi/10.1002/14651858.CD005196.pub4/abstract>.
72. Deva S, Jameson M. Histamine type 2 receptor antagonists as adjuvant treatment for resected colorectal cancer. Cochrane Database of Systematic Reviews 2012; (8).  
<http://onlinelibrary.wiley.com/doi/10.1002/14651858.CD007814.pub2/abstract>.
73. Diaz-Nieto R, Orti-Rodríguez R, Winslet M. Post-surgical chemotherapy versus surgery alone for resectable gastric cancer. Cochrane Database of Systematic Reviews 2013; (9).  
<http://onlinelibrary.wiley.com/doi/10.1002/14651858.CD008415.pub2/abstract>.
74. Dominick S, Hickey M, Chin J, et al. Levonorgestrel intrauterine system for endometrial protection in women with breast cancer on adjuvant tamoxifen. Cochrane Database of Systematic Reviews 2015; (12).  
<http://onlinelibrary.wiley.com/doi/10.1002/14651858.CD007245.pub3/abstract>.
75. Dong Z, Xu J, Wang Z, et al. Stents for the prevention of pancreatic fistula following pancreaticoduodenectomy. Cochrane Database of Systematic Reviews 2016; (5).  
<http://onlinelibrary.wiley.com/doi/10.1002/14651858.CD008914.pub3/abstract>.
76. D'Souza N, Darmanin G, Fedorowicz Z. Immediate versus delayed reconstruction following surgery for breast cancer. Cochrane Database of Systematic Reviews

2011; (7).

<http://onlinelibrary.wiley.com/doi/10.1002/14651858.CD008674.pub2/abstract>

77. Edey Katharine A, Allan E, Murdoch John B, et al. Interventions for the treatment of Paget's disease of the vulva. Cochrane Database of Systematic Reviews 2013; (10).

<http://onlinelibrary.wiley.com/doi/10.1002/14651858.CD009245.pub2/abstract>

78. Elattar A, Bryant A, Winter-Roach Brett A, et al. Optimal primary surgical treatment for advanced epithelial ovarian cancer. Cochrane Database of Systematic Reviews 2011; (8).

<http://onlinelibrary.wiley.com/doi/10.1002/14651858.CD007565.pub2/abstract>

79. Eleje George U, Eke Ahizechukwu C, Igberase Gabriel O, et al. Palliative interventions for controlling vaginal bleeding in advanced cervical cancer. Cochrane Database of Systematic Reviews 2015; (5).

<http://onlinelibrary.wiley.com/doi/10.1002/14651858.CD011000.pub2/abstract>

80. Eliakim-Raz N, Vinograd I, Zalmanovici Trestioreanu A, et al. Influenza vaccines in immunosuppressed adults with cancer. Cochrane Database of Systematic Reviews 2013; (10).

<http://onlinelibrary.wiley.com/doi/10.1002/14651858.CD008983.pub2/abstract>

81. Elias S, Al-Khayatt A, Porter Richard WJ, et al. Dental extractions prior to radiotherapy to the jaws for reducing post-radiotherapy dental complications.

Cochrane Database of Systematic Reviews 2013; (2).

<http://onlinelibrary.wiley.com/doi/10.1002/14651858.CD008857.pub2/abstract>.

82. Estcourt L, Stanworth S, Doree C, et al. Prophylactic platelet transfusion for prevention of bleeding in patients with haematological disorders after chemotherapy and stem cell transplantation. Cochrane Database of Systematic Reviews 2012; (5).

<http://onlinelibrary.wiley.com/doi/10.1002/14651858.CD004269.pub3/abstract>.

83. Estcourt Lise J, Stanworth S, Doree C, et al. Different doses of prophylactic platelet transfusion for preventing bleeding in people with haematological disorders after myelosuppressive chemotherapy or stem cell transplantation. Cochrane Database of Systematic Reviews 2015; (10).

<http://onlinelibrary.wiley.com/doi/10.1002/14651858.CD010984.pub2/abstract>.

84. Estcourt Lise J, Stanworth Simon J, Doree C, et al. Granulocyte transfusions for preventing infections in people with neutropenia or neutrophil dysfunction. Cochrane Database of Systematic Reviews 2015; (6).

<http://onlinelibrary.wiley.com/doi/10.1002/14651858.CD005341.pub3/abstract>.

85. Everett T, Bryant A, Griffin Michelle F, et al. Interventions targeted at women to encourage the uptake of cervical screening. Cochrane Database of Systematic Reviews 2011; (5).

<http://onlinelibrary.wiley.com/doi/10.1002/14651858.CD002834.pub2/abstract>.



86. Ezzo J, Manheimer E, McNeely Margaret L, et al. Manual lymphatic drainage for lymphedema following breast cancer treatment. Cochrane Database of Systematic Reviews 2015; (5).  
<http://onlinelibrary.wiley.com/doi/10.1002/14651858.CD003475.pub2/abstract>
87. Farquhar C, Marjoribanks J, Lethaby A, et al. High-dose chemotherapy and autologous bone marrow or stem cell transplantation versus conventional chemotherapy for women with early poor prognosis breast cancer. Cochrane Database of Systematic Reviews 2016; (5).  
<http://onlinelibrary.wiley.com/doi/10.1002/14651858.CD003139.pub3/abstract>
88. Felbel S, Meerpohl Joerg J, Monsef I, et al. Yoga in addition to standard care for patients with haematological malignancies. Cochrane Database of Systematic Reviews 2014; (6).  
<http://onlinelibrary.wiley.com/doi/10.1002/14651858.CD010146.pub2/abstract>
89. Ford Alexander C, Forman D, Hunt R, et al. Helicobacter pylori eradication for the prevention of gastric neoplasia. Cochrane Database of Systematic Reviews 2015; (7).  
<http://onlinelibrary.wiley.com/doi/10.1002/14651858.CD005583.pub2/abstract>
90. Frost Jonathan A, Webster Katie E, Bryant A, et al. Lymphadenectomy for the management of endometrial cancer. Cochrane Database of Systematic Reviews 2015; (9).

<http://onlinelibrary.wiley.com/doi/10.1002/14651858.CD007585.pub3/abstract>

91. Fu J, Fang F, Xie L, et al. Prophylactic chemotherapy for hydatidiform mole to prevent gestational trophoblastic neoplasia. Cochrane Database of Systematic Reviews 2012; (10).

<http://onlinelibrary.wiley.com/doi/10.1002/14651858.CD007289.pub2/abstract>

92. Furness S, Glenny A-M, Worthington Helen V, et al. Interventions for the treatment of oral cavity and oropharyngeal cancer: chemotherapy. Cochrane Database of Systematic Reviews 2011; (4).

<http://onlinelibrary.wiley.com/doi/10.1002/14651858.CD006386.pub3/abstract>

93. Gafter-Gvili A, Fraser A, Paul M, et al. Antibiotic prophylaxis for bacterial infections in afebrile neutropenic patients following chemotherapy. Cochrane Database of Systematic Reviews 2012; (1).

<http://onlinelibrary.wiley.com/doi/10.1002/14651858.CD004386.pub3/abstract>

94. Gaitskell K, Martinek I, Bryant A, et al. Angiogenesis inhibitors for the treatment of ovarian cancer. Cochrane Database of Systematic Reviews 2011; (9).

<http://onlinelibrary.wiley.com/doi/10.1002/14651858.CD007930.pub2/abstract>

95. Galaal K, Al Moundhri M, Bryant A, et al. Adjuvant chemotherapy for advanced endometrial cancer. Cochrane Database of Systematic Reviews 2014; (5).

<http://onlinelibrary.wiley.com/doi/10.1002/14651858.CD010681.pub2/abstract>

96. Galaal K, Bryant A, Deane Katherine HO, et al. Interventions for reducing anxiety in women undergoing colposcopy. Cochrane Database of Systematic Reviews 2011; (12).  
<http://onlinelibrary.wiley.com/doi/10.1002/14651858.CD006013.pub3/abstract>
97. Galaal K, Bryant A, Fisher Ann D, et al. Laparoscopy versus laparotomy for the management of early stage endometrial cancer. Cochrane Database of Systematic Reviews 2012; (9).  
<http://onlinelibrary.wiley.com/doi/10.1002/14651858.CD006655.pub2/abstract>
98. Galaal K, van der Heijden E, Godfrey K, et al. Adjuvant radiotherapy and/or chemotherapy after surgery for uterine carcinosarcoma. Cochrane Database of Systematic Reviews 2013; (2).  
<http://onlinelibrary.wiley.com/doi/10.1002/14651858.CD006812.pub3/abstract>
99. Galway K, Black A, Cantwell M, et al. Psychosocial interventions to improve quality of life and emotional wellbeing for recently diagnosed cancer patients. Cochrane Database of Systematic Reviews 2012; (11).  
<http://onlinelibrary.wiley.com/doi/10.1002/14651858.CD007064.pub2/abstract>
100. Gartlehner G, Thaler K, Chapman A, et al. Mammography in combination with breast ultrasonography versus mammography for breast cancer screening in women at average risk. Cochrane Database of Systematic Reviews 2013; (4).  
<http://onlinelibrary.wiley.com/doi/10.1002/14651858.CD009632.pub2/abstract>

101. Gbabe Oluwatoyin F, Okwundu Charles I, Dedicoat M, et al. Treatment of severe or progressive Kaposi's sarcoma in HIV-infected adults. Cochrane Database of Systematic Reviews 2014; (9).  
<http://onlinelibrary.wiley.com/doi/10.1002/14651858.CD003256.pub2/abstract>
102. George R, Jeba J, Ramkumar G, et al. Interventions for the treatment of metastatic extradural spinal cord compression in adults. Cochrane Database of Systematic Reviews 2015; (9).  
<http://onlinelibrary.wiley.com/doi/10.1002/14651858.CD006716.pub3/abstract>
103. Gherzi D, Willson Melina L, Chan Matthew Ming K, et al. Taxane-containing regimens for metastatic breast cancer. Cochrane Database of Systematic Reviews 2015; (6).  
<http://onlinelibrary.wiley.com/doi/10.1002/14651858.CD003366.pub3/abstract>
104. Goodwin A, Parker S, Gherzi D, et al. Post-operative radiotherapy for ductal carcinoma in situ of the breast. Cochrane Database of Systematic Reviews 2013; (11).  
<http://onlinelibrary.wiley.com/doi/10.1002/14651858.CD000563.pub7/abstract>
105. Goossen Ginette M, Kremer Leontien CM, van de Wetering Marianne D. Influenza vaccination in children being treated with chemotherapy for cancer. Cochrane Database of Systematic Reviews 2013; (8).  
<http://onlinelibrary.wiley.com/doi/10.1002/14651858.CD006484.pub3/abstract>

106. Gordijn Maartje S, Rensen N, Gemke Reinoud JBJ, et al. Hypothalamic-pituitary-adrenal (HPA) axis suppression after treatment with glucocorticoid therapy for childhood acute lymphoblastic leukaemia. Cochrane Database of Systematic Reviews 2015; (8).  
<http://onlinelibrary.wiley.com/doi/10.1002/14651858.CD008727.pub3/abstract>.
107. Gøtzsche Peter C, Johansen Helle K. Routine versus selective antifungal administration for control of fungal infections in patients with cancer. Cochrane Database of Systematic Reviews 2014; (9).  
<http://onlinelibrary.wiley.com/doi/10.1002/14651858.CD000026.pub2/abstract>.
108. Gøtzsche Peter C, Jørgensen Karsten J. Screening for breast cancer with mammography. Cochrane Database of Systematic Reviews 2013; (6).  
<http://onlinelibrary.wiley.com/doi/10.1002/14651858.CD001877.pub5/abstract>.
109. Grabosch Shannon M, Shariff Osman M, Wulff Judith L, et al. Non-steroidal anti-inflammatory agents to induce regression and prevent the progression of cervical intraepithelial neoplasia. Cochrane Database of Systematic Reviews 2014; (4).  
<http://onlinelibrary.wiley.com/doi/10.1002/14651858.CD004121.pub3/abstract>.
110. Grande Antonio J, Silva V, Riera R, et al. Exercise for cancer cachexia in adults. Cochrane Database of Systematic Reviews 2014; (11).  
<http://onlinelibrary.wiley.com/doi/10.1002/14651858.CD010804.pub2/abstract>.

111. Gupta Aditya K, Paquet M, Villanueva E, et al. Interventions for actinic keratoses. Cochrane Database of Systematic Reviews 2012; (12).  
<http://onlinelibrary.wiley.com/doi/10.1002/14651858.CD004415.pub2/abstract>
112. Gurion R, Belnik-Plitman Y, Gafter-Gvili A, et al. Colony-stimulating factors for prevention and treatment of infectious complications in patients with acute myelogenous leukemia. Cochrane Database of Systematic Reviews 2012; (6).  
<http://onlinelibrary.wiley.com/doi/10.1002/14651858.CD008238.pub3/abstract>
113. Gurumurthy M, Bryant A, Shanbhag S. Effectiveness of different treatment modalities for the management of adult-onset granulosa cell tumours of the ovary (primary and recurrent). Cochrane Database of Systematic Reviews 2014; (4).  
<http://onlinelibrary.wiley.com/doi/10.1002/14651858.CD006912.pub2/abstract>
114. Gurusamy Kurinchi S, Kumar S, Davidson Brian R. Prophylactic gastrojejunostomy for unresectable periampullary carcinoma. Cochrane Database of Systematic Reviews 2013; (2).  
<http://onlinelibrary.wiley.com/doi/10.1002/14651858.CD008533.pub3/abstract>
115. Gurusamy Kurinchi S, Kumar S, Davidson Brian R, et al. Resection versus other treatments for locally advanced pancreatic cancer. Cochrane Database of Systematic Reviews 2014; (2).  
<http://onlinelibrary.wiley.com/doi/10.1002/14651858.CD010244.pub2/abstract>

116. Gurusamy Kurinchi S, Pallari E, Midya S, et al. Laparoscopic versus open transhiatal oesophagectomy for oesophageal cancer. Cochrane Database of Systematic Reviews 2016; (3).  
<http://onlinelibrary.wiley.com/doi/10.1002/14651858.CD011390.pub2/abstract>.
117. Hadley G, Derry S, Moore RA, et al. Transdermal fentanyl for cancer pain. Cochrane Database of Systematic Reviews 2013; (10).  
<http://onlinelibrary.wiley.com/doi/10.1002/14651858.CD010270.pub2/abstract>.
118. Haldar K, Gaitskell K, Bryant A, et al. Epidermal growth factor receptor blockers for the treatment of ovarian cancer. Cochrane Database of Systematic Reviews 2011; (10).  
<http://onlinelibrary.wiley.com/doi/10.1002/14651858.CD007927.pub3/abstract>.
119. Hart Michael G, Garside R, Rogers G, et al. Chemotherapy wafers for high grade glioma. Cochrane Database of Systematic Reviews 2011; (3).  
<http://onlinelibrary.wiley.com/doi/10.1002/14651858.CD007294.pub2/abstract>.
120. Hart Michael G, Garside R, Rogers G, et al. Temozolomide for high grade glioma. Cochrane Database of Systematic Reviews 2013; (4).  
<http://onlinelibrary.wiley.com/doi/10.1002/14651858.CD007415.pub2/abstract>.
121. Hartmann T, Hübel K, Monsef I, et al. Additional plerixafor to granulocyte colony-stimulating factors for haematopoietic stem cell mobilisation for autologous transplantation in people with malignant lymphoma or multiple myeloma.

Cochrane Database of Systematic Reviews 2015; (10).

<http://onlinelibrary.wiley.com/doi/10.1002/14651858.CD010615.pub2/abstract>.

122. Helm CW, Lorenz Douglas J, Meyer Nicholas J, et al. Retinoids for preventing the progression of cervical intra-epithelial neoplasia. Cochrane Database of Systematic Reviews 2013; (6).

<http://onlinelibrary.wiley.com/doi/10.1002/14651858.CD003296.pub3/abstract>.

123. Henschke N, Maher Christopher G, Ostelo Raymond WJG, et al. Red flags to screen for malignancy in patients with low-back pain. Cochrane Database of Systematic Reviews 2013; (2).

<http://onlinelibrary.wiley.com/doi/10.1002/14651858.CD008686.pub2/abstract>.

124. Henson Caroline C, Burden S, Davidson Susan E, et al. Nutritional interventions for reducing gastrointestinal toxicity in adults undergoing radical pelvic radiotherapy. Cochrane Database of Systematic Reviews 2013; (11).

<http://onlinelibrary.wiley.com/doi/10.1002/14651858.CD009896.pub2/abstract>.

125. Herbst C, Monsef I, Specht L, et al. Chemotherapy alone versus chemotherapy plus radiotherapy for adults with early stage Hodgkin lymphoma. Cochrane Database of Systematic Reviews 2011; (4).

<http://onlinelibrary.wiley.com/doi/10.1002/14651858.CD007110.pub3/abstract>.

126. Hickey Brigid E, Francis Daniel P, Lehman M. Sequencing of chemotherapy and radiotherapy for early breast cancer. Cochrane Database of Systematic Reviews



2013; (4).

<http://onlinelibrary.wiley.com/doi/10.1002/14651858.CD005212.pub3/abstract>.

127. Hilgart Jennifer S, Coles B, Iredale R. Cancer genetic risk assessment for individuals at risk of familial breast cancer. Cochrane Database of Systematic Reviews 2012; (2).

<http://onlinelibrary.wiley.com/doi/10.1002/14651858.CD003721.pub3/abstract>.

128. Holme Ø, Bretthauer M, Fretheim A, et al. Flexible sigmoidoscopy versus faecal occult blood testing for colorectal cancer screening in asymptomatic individuals. Cochrane Database of Systematic Reviews 2013; (9).

<http://onlinelibrary.wiley.com/doi/10.1002/14651858.CD009259.pub2/abstract>.

129. Holtick U, Albrecht M, Chemnitz Jens M, et al. Bone marrow versus peripheral blood allogeneic haematopoietic stem cell transplantation for haematological malignancies in adults. Cochrane Database of Systematic Reviews 2014; (4).

<http://onlinelibrary.wiley.com/doi/10.1002/14651858.CD010189.pub2/abstract>.

130. Hurlow A, Bennett Michael I, Robb Karen A, et al. Transcutaneous electric nerve stimulation (TENS) for cancer pain in adults. Cochrane Database of Systematic Reviews 2012; (3).

<http://onlinelibrary.wiley.com/doi/10.1002/14651858.CD006276.pub3/abstract>.

131. Hüttner Felix J, Fitzmaurice C, Schwarzer G, et al. Pylorus-preserving pancreaticoduodenectomy (pp Whipple) versus pancreaticoduodenectomy

(classic Whipple) for surgical treatment of periampullary and pancreatic carcinoma. Cochrane Database of Systematic Reviews 2016; (2).

<http://onlinelibrary.wiley.com/doi/10.1002/14651858.CD006053.pub6/abstract>

132. Hutzschenreuter F, Monsef I, Kreuzer K-A, et al. Granulocyte and granulocyte-macrophage colony stimulating factors for newly diagnosed patients with myelodysplastic syndromes. Cochrane Database of Systematic Reviews 2016; (2).

<http://onlinelibrary.wiley.com/doi/10.1002/14651858.CD009310.pub2/abstract>

133. Ilic D, Forbes Kristian M, Hased C. Lycopene for the prevention of prostate cancer. Cochrane Database of Systematic Reviews 2011; (11).

<http://onlinelibrary.wiley.com/doi/10.1002/14651858.CD008007.pub2/abstract>

134. Ilic D, Misso Marie L. Screening for testicular cancer. Cochrane Database of Systematic Reviews 2011; (2).

<http://onlinelibrary.wiley.com/doi/10.1002/14651858.CD007853.pub2/abstract>

135. Ilic D, Neuberger Molly M, Djulbegovic M, et al. Screening for prostate cancer. Cochrane Database of Systematic Reviews 2013; (1).

<http://onlinelibrary.wiley.com/doi/10.1002/14651858.CD004720.pub3/abstract>

136. Itchaki G, Gafter-Gvili A, Lahav M, et al. Anthracycline-containing regimens for treatment of follicular lymphoma in adults. Cochrane Database of Systematic Reviews 2013; (7).

<http://onlinelibrary.wiley.com/doi/10.1002/14651858.CD008909.pub2/abstract>

137. Jaaback K, Johnson N, Lawrie Theresa A. Intraperitoneal chemotherapy for the initial management of primary epithelial ovarian cancer. Cochrane Database of Systematic Reviews 2016; (1).

<http://onlinelibrary.wiley.com/doi/10.1002/14651858.CD005340.pub4/abstract>

138. Jassim Ghufuran A, Whitford David L, Hickey A, et al. Psychological interventions for women with non-metastatic breast cancer. Cochrane Database of Systematic Reviews 2015; (5).

<http://onlinelibrary.wiley.com/doi/10.1002/14651858.CD008729.pub2/abstract>

139. Jin H, Leng Q, Li C. Dietary flavonoid for preventing colorectal neoplasms. Cochrane Database of Systematic Reviews 2012; (8).

<http://onlinelibrary.wiley.com/doi/10.1002/14651858.CD009350.pub2/abstract>

140. Jin X, Ruiz Beguerie J, Sze Daniel M-y, et al. Ganoderma lucidum (Reishi mushroom) for cancer treatment. Cochrane Database of Systematic Reviews 2016; (4).

<http://onlinelibrary.wiley.com/doi/10.1002/14651858.CD007731.pub3/abstract>

141. Johansen Helle K, Gøtzsche Peter C. Amphotericin B versus fluconazole for controlling fungal infections in neutropenic cancer patients. Cochrane Database of Systematic Reviews 2014; (9).

<http://onlinelibrary.wiley.com/doi/10.1002/14651858.CD000239.pub2/abstract>

142. Johansen Helle K, Gøtzsche Peter C. Amphotericin B lipid soluble formulations versus amphotericin B in cancer patients with neutropenia. Cochrane Database of Systematic Reviews 2014; (9).  
<http://onlinelibrary.wiley.com/doi/10.1002/14651858.CD000969.pub2/abstract>.
143. Johnson N, Bryant A, Miles T, et al. Adjuvant chemotherapy for endometrial cancer after hysterectomy. Cochrane Database of Systematic Reviews 2011; (10).  
<http://onlinelibrary.wiley.com/doi/10.1002/14651858.CD003175.pub2/abstract>.
144. Jones Daniel J, Bunn F, Bell-Syer Sophie V. Prophylactic antibiotics to prevent surgical site infection after breast cancer surgery. Cochrane Database of Systematic Reviews 2014; (3).  
<http://onlinelibrary.wiley.com/doi/10.1002/14651858.CD005360.pub4/abstract>.
145. Jones G, Cleves A, Wilt Timothy J, et al. Intravesical gemcitabine for non-muscle invasive bladder cancer. Cochrane Database of Systematic Reviews 2012; (1).  
<http://onlinelibrary.wiley.com/doi/10.1002/14651858.CD009294.pub2/abstract>.
146. Jørgensen Karsten J, Gøtzsche Peter C, Dalbøge Christina S, et al. Voriconazole versus amphotericin B or fluconazole in cancer patients with neutropenia. Cochrane Database of Systematic Reviews 2014; (2).  
<http://onlinelibrary.wiley.com/doi/10.1002/14651858.CD004707.pub3/abstract>.
147. Kaushik S, Pepas L, Nordin A, et al. Surgical interventions for high-grade vulval intraepithelial neoplasia. Cochrane Database of Systematic Reviews 2014; (3).

<http://onlinelibrary.wiley.com/doi/10.1002/14651858.CD007928.pub3/abstract>

148. Kerrigan S, Grant R. Antiepileptic drugs for treating seizures in adults with brain tumours. Cochrane Database of Systematic Reviews 2011; (8).

<http://onlinelibrary.wiley.com/doi/10.1002/14651858.CD008586.pub2/abstract>

149. Khan F, Amatya B, Ng L, et al. Multidisciplinary rehabilitation for follow-up of women treated for breast cancer. Cochrane Database of Systematic Reviews 2012; (12).

<http://onlinelibrary.wiley.com/doi/10.1002/14651858.CD009553.pub2/abstract>

150. Khan F, Amatya B, Ng L, et al. Multidisciplinary rehabilitation after primary brain tumour treatment. Cochrane Database of Systematic Reviews 2015; (8).

<http://onlinelibrary.wiley.com/doi/10.1002/14651858.CD009509.pub3/abstract>

151. Kharfan-Dabaja M, Mhaskar R, Reljic T, et al. Mycophenolate mofetil versus methotrexate for prevention of graft-versus-host disease in people receiving allogeneic hematopoietic stem cell transplantation. Cochrane Database of Systematic Reviews 2014; (7).

<http://onlinelibrary.wiley.com/doi/10.1002/14651858.CD010280.pub2/abstract>

152. Khasraw M, Ameratunga Malaka S, Grant R, et al. Antiangiogenic therapy for high-grade glioma. Cochrane Database of Systematic Reviews 2014; (9).

<http://onlinelibrary.wiley.com/doi/10.1002/14651858.CD008218.pub3/abstract>

153. Kidane B, Coughlin S, Vogt K, et al. Preoperative chemotherapy for resectable thoracic esophageal cancer. Cochrane Database of Systematic Reviews 2015; (5).  
<http://onlinelibrary.wiley.com/doi/10.1002/14651858.CD001556.pub3/abstract>
154. Kietpeerakool C, Supoken A, Laopaiboon M, et al. Effectiveness of tranexamic acid in reducing blood loss during cytoreductive surgery for advanced ovarian cancer. Cochrane Database of Systematic Reviews 2016; (1).  
<http://onlinelibrary.wiley.com/doi/10.1002/14651858.CD011732.pub2/abstract>
155. Knijnenburg Sebastiaan L, Mulder Renée L, Schouten-Van Meeteren Antoinette YN, et al. Early and late renal adverse effects after potentially nephrotoxic treatment for childhood cancer. Cochrane Database of Systematic Reviews 2013; (10).  
<http://onlinelibrary.wiley.com/doi/10.1002/14651858.CD008944.pub2/abstract>
156. Kokka F, Bryant A, Brockbank E, et al. Surgical treatment of stage IA2 cervical cancer. Cochrane Database of Systematic Reviews 2014; (5).  
<http://onlinelibrary.wiley.com/doi/10.1002/14651858.CD010870.pub2/abstract>
157. Kokka F, Bryant A, Brockbank E, et al. Hysterectomy with radiotherapy or chemotherapy or both for women with locally advanced cervical cancer. Cochrane Database of Systematic Reviews 2015; (4).  
<http://onlinelibrary.wiley.com/doi/10.1002/14651858.CD010260.pub2/abstract>
158. Kong A, Johnson N, Kitchener Henry C, et al. Adjuvant radiotherapy for stage I endometrial cancer. Cochrane Database of Systematic Reviews 2012; (4).

<http://onlinelibrary.wiley.com/doi/10.1002/14651858.CD003916.pub4/abstract>

159. Kucukmetin A, Biliatis I, Naik R, et al. Laparoscopically assisted radical vaginal hysterectomy versus radical abdominal hysterectomy for the treatment of early cervical cancer. Cochrane Database of Systematic Reviews 2013; (10).

<http://onlinelibrary.wiley.com/doi/10.1002/14651858.CD006651.pub3/abstract>

160. Kunath F, Grobe Henrik R, Rücker G, et al. Non-steroidal antiandrogen monotherapy compared with luteinising hormone-releasing hormone agonists or surgical castration monotherapy for advanced prostate cancer. Cochrane Database of Systematic Reviews 2014; (6).

<http://onlinelibrary.wiley.com/doi/10.1002/14651858.CD009266.pub2/abstract>

161. Kyrgidis A, Tzellos T, Mocellin S, et al. Sentinel lymph node biopsy followed by lymph node dissection for localised primary cutaneous melanoma. Cochrane Database of Systematic Reviews 2015; (5).

<http://onlinelibrary.wiley.com/doi/10.1002/14651858.CD010307.pub2/abstract>

162. Kyrgiou M, Mitra A, Arbyn M, et al. Fertility and early pregnancy outcomes after conservative treatment for cervical intraepithelial neoplasia. Cochrane Database of Systematic Reviews 2015; (9).

<http://onlinelibrary.wiley.com/doi/10.1002/14651858.CD008478.pub2/abstract>

163. Lanceley A, Fiander A, McCormack M, et al. Follow-up protocols for women with cervical cancer after primary treatment. Cochrane Database of Systematic

Reviews 2013; (11).

<http://onlinelibrary.wiley.com/doi/10.1002/14651858.CD008767.pub2/abstract>

164. Lawal Aramide O, Musekiwa A, Grobler L. Interferon after surgery for women with advanced (Stage II-IV) epithelial ovarian cancer. Cochrane Database of Systematic Reviews 2013; (6).

<http://onlinelibrary.wiley.com/doi/10.1002/14651858.CD009620.pub2/abstract>

165. Lawrie Theresa A, Bryant A, Cameron A, et al. Pegylated liposomal doxorubicin for relapsed epithelial ovarian cancer. Cochrane Database of Systematic Reviews 2013; (7).

<http://onlinelibrary.wiley.com/doi/10.1002/14651858.CD006910.pub2/abstract>

166. Lawrie Theresa A, Nordin A, Chakrabarti M, et al. Medical and surgical interventions for the treatment of usual-type vulval intraepithelial neoplasia. Cochrane Database of Systematic Reviews 2016; (1).

<http://onlinelibrary.wiley.com/doi/10.1002/14651858.CD011837.pub2/abstract>

167. Lawrie Theresa A, Patel A, Martin-Hirsch Pierre PL, et al. Sentinel node assessment for diagnosis of groin lymph node involvement in vulval cancer. Cochrane Database of Systematic Reviews 2014; (6).

<http://onlinelibrary.wiley.com/doi/10.1002/14651858.CD010409.pub2/abstract>

168. Lawrie Theresa A, Rabbie R, Thoma C, et al. Pegylated liposomal doxorubicin for first-line treatment of epithelial ovarian cancer. Cochrane Database of Systematic



Reviews 2013; (10).

<http://onlinelibrary.wiley.com/doi/10.1002/14651858.CD010482.pub2/abstract>.

169. Lawrie Theresa A, Winter-Roach Brett A, Heus P, et al. Adjuvant (post-surgery) chemotherapy for early stage epithelial ovarian cancer. Cochrane Database of Systematic Reviews 2015; (12).

<http://onlinelibrary.wiley.com/doi/10.1002/14651858.CD004706.pub5/abstract>.

170. Lecavalier-Barsoum M, Quon H, Abdulkarim B. Adjuvant treatment of anaplastic oligodendrogliomas and oligoastrocytomas. Cochrane Database of Systematic Reviews 2014; (5).

<http://onlinelibrary.wiley.com/doi/10.1002/14651858.CD007104.pub2/abstract>.

171. Lee Siew H, Grant R, Kennedy C, et al. Positioning and spinal bracing for pain relief in metastatic spinal cord compression in adults. Cochrane Database of Systematic Reviews 2015; (9).

<http://onlinelibrary.wiley.com/doi/10.1002/14651858.CD007609.pub3/abstract>.

172. Leffers N, Daemen T, Helfrich W, et al. Antigen-specific active immunotherapy for ovarian cancer. Cochrane Database of Systematic Reviews 2014; (9).

<http://onlinelibrary.wiley.com/doi/10.1002/14651858.CD007287.pub3/abstract>.

173. Li X, Xu S, Tan Y, et al. The effects of idarubicin versus other anthracyclines for induction therapy of patients with newly diagnosed leukaemia. Cochrane Database of Systematic Reviews 2015; (6).

<http://onlinelibrary.wiley.com/doi/10.1002/14651858.CD010432.pub2/abstract>

174. Liu R, Wang X, Tian Jin H, et al. High dose rate versus low dose rate intracavity brachytherapy for locally advanced uterine cervix cancer. Cochrane Database of Systematic Reviews 2014; (10).

<http://onlinelibrary.wiley.com/doi/10.1002/14651858.CD007563.pub3/abstract>

175. Loeffen Erik AH, te Poele Esther M, Tissing Wim JE, et al. Very early discharge versus early discharge versus non-early discharge in children with cancer and febrile neutropenia. Cochrane Database of Systematic Reviews 2016; (2).

<http://onlinelibrary.wiley.com/doi/10.1002/14651858.CD008382.pub2/abstract>

176. Lu D, Wang X, Shi G. Perioperative enhanced recovery programmes for gynaecological cancer patients. Cochrane Database of Systematic Reviews 2015; (3).

<http://onlinelibrary.wiley.com/doi/10.1002/14651858.CD008239.pub4/abstract>

177. Macaya A, Muñoz-Santos C, Balaguer A, et al. Interventions for anal canal intraepithelial neoplasia. Cochrane Database of Systematic Reviews 2012; (12).

<http://onlinelibrary.wiley.com/doi/10.1002/14651858.CD009244.pub2/abstract>

178. Macey R, Walsh T, Brocklehurst P, et al. Diagnostic tests for oral cancer and potentially malignant disorders in patients presenting with clinically evident lesions. Cochrane Database of Systematic Reviews 2015; (5).

<http://onlinelibrary.wiley.com/doi/10.1002/14651858.CD010276.pub2/abstract>

179. Manser R, Lethaby A, Irving Louis B, et al. Screening for lung cancer. Cochrane Database of Systematic Reviews 2013; (6).

<http://onlinelibrary.wiley.com/doi/10.1002/14651858.CD001991.pub3/abstract>

180. Mao C, Fu X-H, Yuan J-Q, et al. Interleukin-2 as maintenance therapy for children and adults with acute myeloid leukaemia in first complete remission. Cochrane Database of Systematic Reviews 2015; (11).

<http://onlinelibrary.wiley.com/doi/10.1002/14651858.CD010248.pub2/abstract>

181. Mao C, Yang Z-Y, He B-F, et al. Toremifene versus tamoxifen for advanced breast cancer. Cochrane Database of Systematic Reviews 2012; (7).

<http://onlinelibrary.wiley.com/doi/10.1002/14651858.CD008926.pub2/abstract>

182. Martí-Carvajal Arturo J, Anand V, Solà I. Treatment for disseminated intravascular coagulation in patients with acute and chronic leukemia. Cochrane Database of Systematic Reviews 2015; (6).

<http://onlinelibrary.wiley.com/doi/10.1002/14651858.CD008562.pub3/abstract>

183. Martin-Hirsch Pierre PL, Bryant A. Interventions for preventing blood loss during the treatment of cervical intraepithelial neoplasia. Cochrane Database of Systematic Reviews 2013; (12).

<http://onlinelibrary.wiley.com/doi/10.1002/14651858.CD001421.pub3/abstract>

184. Martin-Hirsch Pierre PL, Bryant A, Keep Sarah L, et al. Adjuvant progestagens for endometrial cancer. Cochrane Database of Systematic Reviews 2011; (6).  
<http://onlinelibrary.wiley.com/doi/10.1002/14651858.CD001040.pub2/abstract>
185. Martin-Hirsch Pierre PL, Paraskeva E, Bryant A, et al. Surgery for cervical intraepithelial neoplasia. Cochrane Database of Systematic Reviews 2013; (12).  
<http://onlinelibrary.wiley.com/doi/10.1002/14651858.CD001318.pub3/abstract>
186. Masterson L, Moualed D, Masood A, et al. De-escalation treatment protocols for human papillomavirus-associated oropharyngeal squamous cell carcinoma. Cochrane Database of Systematic Reviews 2014; (2).  
<http://onlinelibrary.wiley.com/doi/10.1002/14651858.CD010271.pub2/abstract>
187. McCarthy K, Pearson K, Fulton R, et al. Pre-operative chemoradiation for non-metastatic locally advanced rectal cancer. Cochrane Database of Systematic Reviews 2012; (12).  
<http://onlinelibrary.wiley.com/doi/10.1002/14651858.CD008368.pub2/abstract>
188. Mei L, Chen H, Wei Dong M, et al. Maintenance chemotherapy for ovarian cancer. Cochrane Database of Systematic Reviews 2013; (6).  
<http://onlinelibrary.wiley.com/doi/10.1002/14651858.CD007414.pub3/abstract>
189. Mhaskar R, Clark Otavio Augusto C, Lyman G, et al. Colony-stimulating factors for chemotherapy-induced febrile neutropenia. Cochrane Database of Systematic Reviews 2014; (10).

<http://onlinelibrary.wiley.com/doi/10.1002/14651858.CD003039.pub2/abstract>

190. Mhaskar R, Redzepovic J, Wheatley K, et al. Bisphosphonates in multiple myeloma: a network meta-analysis. *Cochrane Database of Systematic Reviews* 2012; (5).

<http://onlinelibrary.wiley.com/doi/10.1002/14651858.CD003188.pub3/abstract>

191. Mhaskar R, Wao H, Miladinovic B, et al. The role of iron in the management of chemotherapy-induced anemia in cancer patients receiving erythropoiesis-stimulating agents. *Cochrane Database of Systematic Reviews* 2016; (2).

<http://onlinelibrary.wiley.com/doi/10.1002/14651858.CD009624.pub2/abstract>

192. Mical P, Borok S, Vidal L, et al. Empirical antibiotics targeting gram-positive bacteria for the treatment of febrile neutropenic patients with cancer. *Cochrane Database of Systematic Reviews* 2014; (6).

<http://onlinelibrary.wiley.com/doi/10.1002/14651858.CD003914.pub4/abstract>

193. Michiels Erna MC, Schouten-Van Meeteren Antoinette YN, Doz F, et al. Chemotherapy for children with medulloblastoma. *Cochrane Database of Systematic Reviews* 2015; (1).

<http://onlinelibrary.wiley.com/doi/10.1002/14651858.CD006678.pub2/abstract>

194. Milazzo S, Horneber M. Laetrile treatment for cancer. *Cochrane Database of Systematic Reviews* 2015; (4).

<http://onlinelibrary.wiley.com/doi/10.1002/14651858.CD005476.pub4/abstract>

195. Miles T, Johnson N. Vaginal dilator therapy for women receiving pelvic radiotherapy. Cochrane Database of Systematic Reviews 2014; (9).  
<http://onlinelibrary.wiley.com/doi/10.1002/14651858.CD007291.pub3/abstract>
196. Mishra Shiraz I, Scherer Roberta W, Geigle Paula M, et al. Exercise interventions on health-related quality of life for cancer survivors. Cochrane Database of Systematic Reviews 2012; (8).  
<http://onlinelibrary.wiley.com/doi/10.1002/14651858.CD007566.pub2/abstract>
197. Mishra Shiraz I, Scherer Roberta W, Snyder C, et al. Exercise interventions on health-related quality of life for people with cancer during active treatment. Cochrane Database of Systematic Reviews 2012; (8).  
<http://onlinelibrary.wiley.com/doi/10.1002/14651858.CD008465.pub2/abstract>
198. Mocellin S, Lens Marko B, Pasquali S, et al. Interferon alpha for the adjuvant treatment of cutaneous melanoma. Cochrane Database of Systematic Reviews 2013; (6).  
<http://onlinelibrary.wiley.com/doi/10.1002/14651858.CD008955.pub2/abstract>
199. Mocellin S, McCulloch P, Kazi H, et al. Extent of lymph node dissection for adenocarcinoma of the stomach. Cochrane Database of Systematic Reviews 2015; (8).  
<http://onlinelibrary.wiley.com/doi/10.1002/14651858.CD001964.pub4/abstract>

200. Mocellin S, Pasquali S. Diagnostic accuracy of endoscopic ultrasonography (EUS) for the preoperative locoregional staging of primary gastric cancer. Cochrane Database of Systematic Reviews 2015; (2).  
<http://onlinelibrary.wiley.com/doi/10.1002/14651858.CD009944.pub2/abstract>.
201. Moja L, Tagliabue L, Balduzzi S, et al. Trastuzumab containing regimens for early breast cancer. Cochrane Database of Systematic Reviews 2012; (4).  
<http://onlinelibrary.wiley.com/doi/10.1002/14651858.CD006243.pub2/abstract>.
202. Molassiotis A, Bailey C, Caress A, et al. Interventions for cough in cancer. Cochrane Database of Systematic Reviews 2015; (5).  
<http://onlinelibrary.wiley.com/doi/10.1002/14651858.CD007881.pub3/abstract>.
203. Moore Philippa M, Rivera Mercado S, Grez Artigues M, et al. Communication skills training for healthcare professionals working with people who have cancer. Cochrane Database of Systematic Reviews 2013; (3).  
<http://onlinelibrary.wiley.com/doi/10.1002/14651858.CD003751.pub3/abstract>.
204. Morrison J, Haldar K, Kehoe S, et al. Chemotherapy versus surgery for initial treatment in advanced ovarian epithelial cancer. Cochrane Database of Systematic Reviews 2012; (8).  
<http://onlinelibrary.wiley.com/doi/10.1002/14651858.CD005343.pub3/abstract>.
205. Moschetti I, Cinquini M, Lambertini M, et al. Follow-up strategies for women treated for early breast cancer. Cochrane Database of Systematic Reviews 2016; (5).

<http://onlinelibrary.wiley.com/doi/10.1002/14651858.CD001768.pub3/abstract>

206. Muchtar E, Vidal L, Ram R, et al. The role of maintenance therapy in acute promyelocytic leukemia in the first complete remission. Cochrane Database of Systematic Reviews 2013; (3).

<http://onlinelibrary.wiley.com/doi/10.1002/14651858.CD009594.pub2/abstract>

207. Mulder Renée L, Paulides M, Langer T, et al. Cyclophosphamide versus ifosfamide for paediatric and young adult bone and soft tissue sarcoma patients. Cochrane Database of Systematic Reviews 2015; (9).

<http://onlinelibrary.wiley.com/doi/10.1002/14651858.CD006300.pub4/abstract>

208. Mulder Renée L, van Dalen Elvira C, Van den Hof M, et al. Hepatic late adverse effects after antineoplastic treatment for childhood cancer. Cochrane Database of Systematic Reviews 2011; (7).

<http://onlinelibrary.wiley.com/doi/10.1002/14651858.CD008205.pub2/abstract>

209. Mustafa M, Carson-Stevens A, Gillespie D, et al. Psychological interventions for women with metastatic breast cancer. Cochrane Database of Systematic Reviews 2013; (6).

<http://onlinelibrary.wiley.com/doi/10.1002/14651858.CD004253.pub4/abstract>

210. Nagorni A, Bjelakovic G, Petrovic B. Narrow band imaging versus conventional white light colonoscopy for the detection of colorectal polyps. Cochrane Database of Systematic Reviews 2012; (1).



<http://onlinelibrary.wiley.com/doi/10.1002/14651858.CD008361.pub2/abstract>

211. Nama V, Nordin A, Bryant A. Patient-reported outcome measures for follow-up after gynaecological cancer treatment. Cochrane Database of Systematic Reviews 2013; (11).

<http://onlinelibrary.wiley.com/doi/10.1002/14651858.CD010299.pub2/abstract>

212. Narayanan K, Hadid Omar H, Barnes Eric A. Mohs micrographic surgery versus surgical excision for periocular basal cell carcinoma. Cochrane Database of Systematic Reviews 2014; (12).

<http://onlinelibrary.wiley.com/doi/10.1002/14651858.CD007041.pub4/abstract>

213. Naumann-Winter F, Greb A, Borchmann P, et al. First-line tandem high-dose chemotherapy and autologous stem cell transplantation versus single high-dose chemotherapy and autologous stem cell transplantation in multiple myeloma, a systematic review of controlled studies. Cochrane Database of Systematic Reviews 2012; (10).

<http://onlinelibrary.wiley.com/doi/10.1002/14651858.CD004626.pub3/abstract>

214. Nicholson Brian D, Shinkins B, Pathiraja I, et al. Blood CEA levels for detecting recurrent colorectal cancer. Cochrane Database of Systematic Reviews 2015; (12).

<http://onlinelibrary.wiley.com/doi/10.1002/14651858.CD011134.pub2/abstract>

215. Nugent B, Lewis S, O'Sullivan Joe M. Enteral feeding methods for nutritional management in patients with head and neck cancers being treated with radiotherapy and/or chemotherapy. Cochrane Database of Systematic Reviews 2013; (1).  
<http://onlinelibrary.wiley.com/doi/10.1002/14651858.CD007904.pub3/abstract>.
216. O'Connor A, McNamara D, O'Moráin Colm A. Surveillance of gastric intestinal metaplasia for the prevention of gastric cancer. Cochrane Database of Systematic Reviews 2013; (9).  
<http://onlinelibrary.wiley.com/doi/10.1002/14651858.CD009322.pub2/abstract>.
217. Okebe Joseph U, Skoetz N, Meremikwu Martin M, et al. Therapeutic interventions for Burkitt lymphoma in children. Cochrane Database of Systematic Reviews 2011; (7).  
<http://onlinelibrary.wiley.com/doi/10.1002/14651858.CD005198.pub3/abstract>.
218. Oliveri Roberto S, Wetterslev J, Gluud C. Transarterial (chemo)embolisation for unresectable hepatocellular carcinoma. Cochrane Database of Systematic Reviews 2011; (3).  
<http://onlinelibrary.wiley.com/doi/10.1002/14651858.CD004787.pub2/abstract>.
219. Ostuzzi G, Matcham F, Dauchy S, et al. Antidepressants for the treatment of depression in people with cancer. Cochrane Database of Systematic Reviews 2015; (6).

<http://onlinelibrary.wiley.com/doi/10.1002/14651858.CD011006.pub2/abstract>

220. Pachler J, Wille-Jørgensen P. Quality of life after rectal resection for cancer, with or without permanent colostomy. Cochrane Database of Systematic Reviews 2012; (12).

<http://onlinelibrary.wiley.com/doi/10.1002/14651858.CD004323.pub4/abstract>

221. Paley Carole A, Johnson Mark I, Tashani Osama A, et al. Acupuncture for cancer pain in adults. Cochrane Database of Systematic Reviews 2015; (10).

<http://onlinelibrary.wiley.com/doi/10.1002/14651858.CD007753.pub3/abstract>

222. Parahoo K, McDonough S, McCaughan E, et al. Psychosocial interventions for men with prostate cancer. Cochrane Database of Systematic Reviews 2013; (12).

<http://onlinelibrary.wiley.com/doi/10.1002/14651858.CD008529.pub3/abstract>

223. Patil Chirag G, Pricola K, Sarmiento JM, et al. Whole brain radiation therapy (WBRT) alone versus WBRT and radiosurgery for the treatment of brain metastases. Cochrane Database of Systematic Reviews 2012; (9).

<http://onlinelibrary.wiley.com/doi/10.1002/14651858.CD006121.pub3/abstract>

224. Paul M, Dickstein Y, Schlesinger A, et al. Beta-lactam versus beta-lactam-aminoglycoside combination therapy in cancer patients with neutropenia. Cochrane Database of Systematic Reviews 2013; (6).

<http://onlinelibrary.wiley.com/doi/10.1002/14651858.CD003038.pub2/abstract>

225. Peinemann F, Bartel C, Grouven U. First-line allogeneic hematopoietic stem cell transplantation of HLA-matched sibling donors compared with first-line ciclosporin and/or antithymocyte or antilymphocyte globulin for acquired severe aplastic anemia. Cochrane Database of Systematic Reviews 2013; (7).  
<http://onlinelibrary.wiley.com/doi/10.1002/14651858.CD006407.pub2/abstract>.
226. Peinemann F, Enk H, Smith Lesley A. Autologous hematopoietic stem cell transplantation following high-dose chemotherapy for nonrhabdomyosarcoma soft tissue sarcomas. Cochrane Database of Systematic Reviews 2013; (4).  
<http://onlinelibrary.wiley.com/doi/10.1002/14651858.CD008216.pub5/abstract>.
227. Peinemann F, Grouven U, Hemkens Lars G, et al. Low-dose rate brachytherapy for men with localized prostate cancer. Cochrane Database of Systematic Reviews 2011; (7).  
<http://onlinelibrary.wiley.com/doi/10.1002/14651858.CD008871.pub2/abstract>.
228. Peinemann F, Kahangire Doreen A, van Dalen Elvira C, et al. Rapid COJEC versus standard induction therapies for high-risk neuroblastoma. Cochrane Database of Systematic Reviews 2015; (5).  
<http://onlinelibrary.wiley.com/doi/10.1002/14651858.CD010774.pub2/abstract>.
229. Peinemann F, van Dalen Elvira C, Kahangire Doreen A, et al. Retinoic acid post consolidation therapy for high-risk neuroblastoma patients treated with autologous hematopoietic stem cell transplantation. Cochrane Database of Systematic Reviews 2015; (1).

<http://onlinelibrary.wiley.com/doi/10.1002/14651858.CD010685.pub2/abstract>

230. Pelayo Alvarez M, Westeel V, Cortés-Jofré M, et al. Chemotherapy versus best supportive care for extensive small cell lung cancer. Cochrane Database of Systematic Reviews 2013; (11).

<http://onlinelibrary.wiley.com/doi/10.1002/14651858.CD001990.pub3/abstract>

231. Peng L, Min S, Zejun Z, et al. Spinal cord stimulation for cancer-related pain in adults. Cochrane Database of Systematic Reviews 2015; (6).

<http://onlinelibrary.wiley.com/doi/10.1002/14651858.CD009389.pub3/abstract>

232. Pepas L, Kaushik S, Nordin A, et al. Medical interventions for high-grade vulval intraepithelial neoplasia. Cochrane Database of Systematic Reviews 2015; (8).

<http://onlinelibrary.wiley.com/doi/10.1002/14651858.CD007924.pub3/abstract>

233. Petersen Sune H, Harling H, Kirkeby Lene T, et al. Postoperative adjuvant chemotherapy in rectal cancer operated for cure. Cochrane Database of Systematic Reviews 2012; (3).

<http://onlinelibrary.wiley.com/doi/10.1002/14651858.CD004078.pub2/abstract>

234. Phillips Robert S, Friend Amanda J, Gibson F, et al. Antiemetic medication for prevention and treatment of chemotherapy-induced nausea and vomiting in childhood. Cochrane Database of Systematic Reviews 2016; (2).

<http://onlinelibrary.wiley.com/doi/10.1002/14651858.CD007786.pub3/abstract>

235. Pidala J, Djulbegovic B, Anasetti C, et al. Allogeneic hematopoietic cell transplantation for adult acute lymphoblastic leukemia (ALL) in first complete remission. Cochrane Database of Systematic Reviews 2011; (10).  
<http://onlinelibrary.wiley.com/doi/10.1002/14651858.CD008818.pub2/abstract>.
236. Preston Nancy J, Hurlow A, Brine J, et al. Blood transfusions for anaemia in patients with advanced cancer. Cochrane Database of Systematic Reviews 2012; (2).  
<http://onlinelibrary.wiley.com/doi/10.1002/14651858.CD009007.pub2/abstract>.
237. Rai Bhavan P, Shelley M, Coles B, et al. Surgical management for upper urinary tract transitional cell carcinoma. Cochrane Database of Systematic Reviews 2011; (4).  
<http://onlinelibrary.wiley.com/doi/10.1002/14651858.CD007349.pub2/abstract>.
238. Rancea M, Monsef I, von Tresckow B, et al. High-dose chemotherapy followed by autologous stem cell transplantation for patients with relapsed/refractory Hodgkin lymphoma. Cochrane Database of Systematic Reviews 2013; (6).  
<http://onlinelibrary.wiley.com/doi/10.1002/14651858.CD009411.pub2/abstract>.
239. Rao Ahsan M, Ahmed I. Laparoscopic versus open liver resection for benign and malignant hepatic lesions in adults. Cochrane Database of Systematic Reviews 2013; (5).  
<http://onlinelibrary.wiley.com/doi/10.1002/14651858.CD010162.pub2/abstract>.
240. Ratnavelu Nithya DG, Brown Andrew P, Mallett S, et al. Intraoperative frozen section analysis for the diagnosis of early stage ovarian cancer in suspicious

pelvic masses. Cochrane Database of Systematic Reviews 2016; (3).

<http://onlinelibrary.wiley.com/doi/10.1002/14651858.CD010360.pub2/abstract>.

241. Reid J, Mills M, Cantwell M, et al. Thalidomide for managing cancer cachexia.

Cochrane Database of Systematic Reviews 2012; (4).

<http://onlinelibrary.wiley.com/doi/10.1002/14651858.CD008664.pub2/abstract>.

242. Renner P, Milazzo S, Liu Jian P, et al. Primary prophylactic colony-stimulating factors for the prevention of chemotherapy-induced febrile neutropenia in breast cancer patients. Cochrane Database of Systematic Reviews 2012; (10).

<http://onlinelibrary.wiley.com/doi/10.1002/14651858.CD007913.pub2/abstract>.

243. Resende Heloisa M, Jacob Luiz Felipe P, Quinellato Luciano V, et al. Combination chemotherapy versus single-agent chemotherapy during preoperative chemoradiation for resectable rectal cancer. Cochrane Database of Systematic Reviews 2015; (10).

<http://onlinelibrary.wiley.com/doi/10.1002/14651858.CD008531.pub2/abstract>.

244. Reveiz L, Rueda J-R, Cardona Andrés F. Palliative endobronchial brachytherapy for non-small cell lung cancer. Cochrane Database of Systematic Reviews 2012; (12).

<http://onlinelibrary.wiley.com/doi/10.1002/14651858.CD004284.pub3/abstract>.

245. Reveiz L, Rueda J-R, Cardona Andrés F. Chemotherapy for brain metastases from small cell lung cancer. Cochrane Database of Systematic Reviews 2012; (6).

<http://onlinelibrary.wiley.com/doi/10.1002/14651858.CD007464.pub2/abstract>

246. Riemsma Robert P, Bala Malgorzata M, Wolff R, et al. Percutaneous ethanol injection for liver metastases. Cochrane Database of Systematic Reviews 2013; (5).

<http://onlinelibrary.wiley.com/doi/10.1002/14651858.CD008717.pub2/abstract>

247. Riemsma Robert P, Bala Malgorzata M, Wolff R, et al. Electro-coagulation for liver metastases. Cochrane Database of Systematic Reviews 2013; (5).

<http://onlinelibrary.wiley.com/doi/10.1002/14651858.CD009497.pub2/abstract>

248. Riemsma Robert P, Bala Malgorzata M, Wolff R, et al. Transarterial (chemo)embolisation versus no intervention or placebo intervention for liver metastases. Cochrane Database of Systematic Reviews 2013; (4).

<http://onlinelibrary.wiley.com/doi/10.1002/14651858.CD009498.pub3/abstract>

249. Riviere D, Gurusamy Kurinchi S, Kooby David A, et al. Laparoscopic versus open distal pancreatectomy for pancreatic cancer. Cochrane Database of Systematic Reviews 2016; (4).

<http://onlinelibrary.wiley.com/doi/10.1002/14651858.CD011391.pub2/abstract>

250. Rizzuto I, Behrens Renee F, Smith Lesley A. Risk of ovarian cancer in women treated with ovarian stimulating drugs for infertility. Cochrane Database of Systematic Reviews 2013; (8).



<http://onlinelibrary.wiley.com/doi/10.1002/14651858.CD008215.pub2/abstract>

251. Robertson L, Yeoh Su E, Stansby G, et al. Effect of testing for cancer on cancer- and venous thromboembolism (VTE)-related mortality and morbidity in patients with unprovoked VTE. Cochrane Database of Systematic Reviews 2015; (3).

<http://onlinelibrary.wiley.com/doi/10.1002/14651858.CD010837.pub2/abstract>

252. Rogers L, Siu Shing Shun N, Luesley D, et al. Radiotherapy and chemoradiation after surgery for early cervical cancer. Cochrane Database of Systematic Reviews 2012; (5).

<http://onlinelibrary.wiley.com/doi/10.1002/14651858.CD007583.pub3/abstract>

253. Ronellenfitsch U, Schwarzbach M, Hofheinz R, et al. Perioperative chemo(radio)therapy versus primary surgery for resectable adenocarcinoma of the stomach, gastroesophageal junction, and lower esophagus. Cochrane Database of Systematic Reviews 2013; (5).

<http://onlinelibrary.wiley.com/doi/10.1002/14651858.CD008107.pub2/abstract>

254. Rooney Alasdair G, Grant R. Pharmacological treatment of depression in patients with a primary brain tumour. Cochrane Database of Systematic Reviews 2013; (5).

<http://onlinelibrary.wiley.com/doi/10.1002/14651858.CD006932.pub3/abstract>

255. Roqué i Figuls M, Martinez-Zapata Maria J, Scott-Brown M, et al. Radioisotopes for metastatic bone pain. Cochrane Database of Systematic Reviews 2011; (3).

<http://onlinelibrary.wiley.com/doi/10.1002/14651858.CD003347.pub3/abstract>

256. Rosa D, Medeiros L, Edelweiss MI, et al. Adjuvant platinum-based chemotherapy for early stage cervical cancer. Cochrane Database of Systematic Reviews 2012; (11).

<http://onlinelibrary.wiley.com/doi/10.1002/14651858.CD005342.pub4/abstract>

257. Rueda J-R, Solà I, Pascual A, et al. Non-invasive interventions for improving well-being and quality of life in patients with lung cancer. Cochrane Database of Systematic Reviews 2011; (9).

<http://onlinelibrary.wiley.com/doi/10.1002/14651858.CD004282.pub3/abstract>

258. Rutten Marianne J, Leeflang Mariska MG, Kenter Gemma G, et al. Laparoscopy for diagnosing resectability of disease in patients with advanced ovarian cancer. Cochrane Database of Systematic Reviews 2014; (2).

<http://onlinelibrary.wiley.com/doi/10.1002/14651858.CD009786.pub2/abstract>

259. Rydzewska L, Tierney J, Vale Claire L, et al. Neoadjuvant chemotherapy plus surgery versus surgery for cervical cancer. Cochrane Database of Systematic Reviews 2012; (12).

<http://onlinelibrary.wiley.com/doi/10.1002/14651858.CD007406.pub3/abstract>

260. Salhofer I, Will A, Monsef I, et al. Meditation for adults with haematological malignancies. Cochrane Database of Systematic Reviews 2016; (2).

<http://onlinelibrary.wiley.com/doi/10.1002/14651858.CD011157.pub2/abstract>

261. Samuel M, Khin Lay W, Brennan Victoria K, et al. Timing of breast surgery in premenopausal breast cancer patients. Cochrane Database of Systematic Reviews 2011; (5).  
<http://onlinelibrary.wiley.com/doi/10.1002/14651858.CD003720.pub2/abstract>.
262. Santos Fábio N, de Castria Tiago B, Cruz Marcelo RS, et al. Chemotherapy for advanced non-small cell lung cancer in the elderly population. Cochrane Database of Systematic Reviews 2015; (10).  
<http://onlinelibrary.wiley.com/doi/10.1002/14651858.CD010463.pub2/abstract>.
263. Sarmiento JM, Venteicher Andrew S, Patil Chirag G. Early versus delayed postoperative radiotherapy for treatment of low-grade gliomas. Cochrane Database of Systematic Reviews 2015; (6).  
<http://onlinelibrary.wiley.com/doi/10.1002/14651858.CD009229.pub2/abstract>.
264. Scatchard K, Forrest Jennifer L, Flubacher M, et al. Chemotherapy for metastatic and recurrent cervical cancer. Cochrane Database of Systematic Reviews 2012; (10).  
<http://onlinelibrary.wiley.com/doi/10.1002/14651858.CD006469.pub2/abstract>.
265. Schaaf M, Reiser M, Borchmann P, et al. High-dose therapy with autologous stem cell transplantation versus chemotherapy or immuno-chemotherapy for follicular lymphoma in adults. Cochrane Database of Systematic Reviews 2012; (1).  
<http://onlinelibrary.wiley.com/doi/10.1002/14651858.CD007678.pub2/abstract>.

266. Schlaak M, Pickenhain J, Theurich S, et al. Allogeneic stem cell transplantation versus conventional therapy for advanced primary cutaneous T-cell lymphoma. Cochrane Database of Systematic Reviews 2013; (8).  
<http://onlinelibrary.wiley.com/doi/10.1002/14651858.CD008908.pub3/abstract>.
267. Schmidt-Hansen M, Baldwin David R, Hasler E, et al. PET-CT for assessing mediastinal lymph node involvement in patients with suspected resectable non-small cell lung cancer. Cochrane Database of Systematic Reviews 2014; (11).  
<http://onlinelibrary.wiley.com/doi/10.1002/14651858.CD009519.pub2/abstract>.
268. Schmidt-Hansen M, Bennett Michael I, Arnold S, et al. Oxycodone for cancer-related pain. Cochrane Database of Systematic Reviews 2015; (2).  
<http://onlinelibrary.wiley.com/doi/10.1002/14651858.CD003870.pub5/abstract>.
269. Schmidt-Hansen M, Bromham N, Taubert M, et al. Buprenorphine for treating cancer pain. Cochrane Database of Systematic Reviews 2015; (3).  
<http://onlinelibrary.wiley.com/doi/10.1002/14651858.CD009596.pub4/abstract>.
270. Schoot Reineke A, Kremer Leontien CM, van de Wetering Marianne D, et al. Systemic treatments for the prevention of venous thrombo-embolic events in paediatric cancer patients with tunnelled central venous catheters. Cochrane Database of Systematic Reviews 2013; (9).  
<http://onlinelibrary.wiley.com/doi/10.1002/14651858.CD009160.pub2/abstract>.

271. Schoot Reineke A, van Dalen Elvira C, van Ommen Cornelia H, et al. Antibiotic and other lock treatments for tunnelled central venous catheter-related infections in children with cancer. Cochrane Database of Systematic Reviews 2013; (6).  
<http://onlinelibrary.wiley.com/doi/10.1002/14651858.CD008975.pub2/abstract>.
272. Scott David A, Mills M, Black A, et al. Multidimensional rehabilitation programmes for adult cancer survivors. Cochrane Database of Systematic Reviews 2013; (3).  
<http://onlinelibrary.wiley.com/doi/10.1002/14651858.CD007730.pub2/abstract>.
273. Scott K, Hayden Patrick J, Will A, et al. Bortezomib for the treatment of multiple myeloma. Cochrane Database of Systematic Reviews 2016; (4).  
<http://onlinelibrary.wiley.com/doi/10.1002/14651858.CD010816.pub2/abstract>.
274. Semple C, Parahoo K, Norman A, et al. Psychosocial interventions for patients with head and neck cancer. Cochrane Database of Systematic Reviews 2013; (7).  
<http://onlinelibrary.wiley.com/doi/10.1002/14651858.CD009441.pub2/abstract>.
275. Shang Pan F, Kwong J, Wang Zhi P, et al. Intravesical Bacillus Calmette-Guérin versus epirubicin for Ta and T1 bladder cancer. Cochrane Database of Systematic Reviews 2011; (5).  
<http://onlinelibrary.wiley.com/doi/10.1002/14651858.CD006885.pub2/abstract>.
276. Sharif Fyeza NJ, Oliver R, Sweet C, et al. Interventions for the treatment of keratocystic odontogenic tumours. Cochrane Database of Systematic Reviews 2015; (11).

<http://onlinelibrary.wiley.com/doi/10.1002/14651858.CD008464.pub3/abstract>

277. Shelley M, Cleves A, Wilt Timothy J, et al. Gemcitabine for unresectable, locally advanced or metastatic bladder cancer. Cochrane Database of Systematic Reviews 2011; (4).

<http://onlinelibrary.wiley.com/doi/10.1002/14651858.CD008976.pub2/abstract>

278. Shepherd Jonathan P, Frampton Geoff K, Harris P. Interventions for encouraging sexual behaviours intended to prevent cervical cancer. Cochrane Database of Systematic Reviews 2011; (4).

<http://onlinelibrary.wiley.com/doi/10.1002/14651858.CD001035.pub2/abstract>

279. Shylasree TS, Bryant A, Athavale R. Chemotherapy and/or radiotherapy in combination with surgery for ovarian carcinosarcoma. Cochrane Database of Systematic Reviews 2013; (2).

<http://onlinelibrary.wiley.com/doi/10.1002/14651858.CD006246.pub2/abstract>

280. Shylasree TS, Bryant A, Howells Robert EJ. Chemoradiation for advanced primary vulval cancer. Cochrane Database of Systematic Reviews 2011; (4).

<http://onlinelibrary.wiley.com/doi/10.1002/14651858.CD003752.pub3/abstract>

281. Sickinger M-T, von Tresckow B, Kobe C, et al. Positron emission tomography-adapted therapy for first-line treatment in individuals with Hodgkin lymphoma. Cochrane Database of Systematic Reviews 2015; (1).

<http://onlinelibrary.wiley.com/doi/10.1002/14651858.CD010533.pub2/abstract>

282. Skoetz N, Bauer K, Elter T, et al. Alemtuzumab for patients with chronic lymphocytic leukaemia. Cochrane Database of Systematic Reviews 2012; (2).

<http://onlinelibrary.wiley.com/doi/10.1002/14651858.CD008078.pub2/abstract>

283. Skoetz N, Bohlius J, Engert A, et al. Prophylactic antibiotics or G(M)-CSF for the prevention of infections and improvement of survival in cancer patients receiving myelotoxic chemotherapy. Cochrane Database of Systematic Reviews 2015; (12).

<http://onlinelibrary.wiley.com/doi/10.1002/14651858.CD007107.pub3/abstract>

284. Smith Lesley A, Azariah F, Lavender Verna TC, et al. Cannabinoids for nausea and vomiting in adults with cancer receiving chemotherapy. Cochrane Database of Systematic Reviews 2015; (11).

<http://onlinelibrary.wiley.com/doi/10.1002/14651858.CD009464.pub2/abstract>

285. Song H, Zhu J, Lu D. Long-term proton pump inhibitor (PPI) use and the development of gastric pre-malignant lesions. Cochrane Database of Systematic Reviews 2014; (12).

<http://onlinelibrary.wiley.com/doi/10.1002/14651858.CD010623.pub2/abstract>

286. Soon Yu Y, Tham Ivan Weng K, Lim Keith H, et al. Surgery or radiosurgery plus whole brain radiotherapy versus surgery or radiosurgery alone for brain metastases. Cochrane Database of Systematic Reviews 2014; (3).

<http://onlinelibrary.wiley.com/doi/10.1002/14651858.CD009454.pub2/abstract>

287. Spanjersberg Willem R, Reurings J, Keus F, et al. Fast track surgery versus conventional recovery strategies for colorectal surgery. Cochrane Database of Systematic Reviews 2011; (2).

<http://onlinelibrary.wiley.com/doi/10.1002/14651858.CD007635.pub2/abstract>

288. Staley H, McCallum I, Bruce J. Postoperative tamoxifen for ductal carcinoma in situ. Cochrane Database of Systematic Reviews 2012; (10).

<http://onlinelibrary.wiley.com/doi/10.1002/14651858.CD007847.pub2/abstract>

289. Stevens R, Macbeth F, Toy E, et al. Palliative radiotherapy regimens for patients with thoracic symptoms from non-small cell lung cancer. Cochrane Database of Systematic Reviews 2015; (1).

<http://onlinelibrary.wiley.com/doi/10.1002/14651858.CD002143.pub4/abstract>

290. Straube C, Derry S, Jackson Kenneth C, et al. Codeine, alone and with paracetamol (acetaminophen), for cancer pain. Cochrane Database of Systematic Reviews 2014; (9).

<http://onlinelibrary.wiley.com/doi/10.1002/14651858.CD006601.pub4/abstract>

291. Stuver Martijn M, ten Tusscher Marieke R, Agasi-Idenburg Carla S, et al. Conservative interventions for preventing clinically detectable upper-limb lymphoedema in patients who are at risk of developing lymphoedema after breast cancer therapy. Cochrane Database of Systematic Reviews 2015; (2).



<http://onlinelibrary.wiley.com/doi/10.1002/14651858.CD009765.pub2/abstract>

292. Taefi A, Abrishami A, Nasser-Moghaddam S, et al. Surgical resection versus liver transplant for patients with hepatocellular carcinoma. Cochrane Database of Systematic Reviews 2013; (6).

<http://onlinelibrary.wiley.com/doi/10.1002/14651858.CD006935.pub2/abstract>

293. Tangjitgamol S, Katanyoo K, Laopaiboon M, et al. Adjuvant chemotherapy after concurrent chemoradiation for locally advanced cervical cancer. Cochrane Database of Systematic Reviews 2014; (12).

<http://onlinelibrary.wiley.com/doi/10.1002/14651858.CD010401.pub2/abstract>

294. Theurich S, Fischmann H, Shimabukuro-Vornhagen A, et al. Polyclonal anti-thymocyte globulins for the prophylaxis of graft-versus-host disease after allogeneic stem cell or bone marrow transplantation in adults. Cochrane Database of Systematic Reviews 2012; (9).

<http://onlinelibrary.wiley.com/doi/10.1002/14651858.CD009159.pub2/abstract>

295. Thomson David R, Sadideen H, Furniss D. Wound drainage after axillary dissection for carcinoma of the breast. Cochrane Database of Systematic Reviews 2013; (10).

<http://onlinelibrary.wiley.com/doi/10.1002/14651858.CD006823.pub2/abstract>

296. Tonia T, Mettler A, Robert N, et al. Erythropoietin or darbepoetin for patients with cancer. Cochrane Database of Systematic Reviews 2012; (12).

<http://onlinelibrary.wiley.com/doi/10.1002/14651858.CD003407.pub5/abstract>

297. Torres Maria FS, Porfirio Gustavo JM, Carvalho Alan PV, et al. Non-invasive positive pressure ventilation for prevention of complications after pulmonary resection in lung cancer patients. Cochrane Database of Systematic Reviews 2015; (9).

<http://onlinelibrary.wiley.com/doi/10.1002/14651858.CD010355.pub2/abstract>

298. Tou S, Malik Ali I, Wexner Steven D, et al. Energy source instruments for laparoscopic colectomy. Cochrane Database of Systematic Reviews 2011; (5).

<http://onlinelibrary.wiley.com/doi/10.1002/14651858.CD007886.pub2/abstract>

299. Tsao May N, Lloyd N, Wong Rebecca KS, et al. Whole brain radiotherapy for the treatment of newly diagnosed multiple brain metastases. Cochrane Database of Systematic Reviews 2012; (4).

<http://onlinelibrary.wiley.com/doi/10.1002/14651858.CD003869.pub3/abstract>

300. Tzellos T, Kyrgidis A, Mocellin S, et al. Interventions for melanoma in situ, including lentigo maligna. Cochrane Database of Systematic Reviews 2014; (12).

<http://onlinelibrary.wiley.com/doi/10.1002/14651858.CD010308.pub2/abstract>

301. Vale Claire L, Tierney J, Bull Sarah J, et al. Chemotherapy for advanced, recurrent or metastatic endometrial carcinoma. Cochrane Database of Systematic Reviews 2012; (8).

<http://onlinelibrary.wiley.com/doi/10.1002/14651858.CD003915.pub4/abstract>

302. van Dalen Elvira C, Caron Huib N, Dickinson Heather O, et al. Cardioprotective interventions for cancer patients receiving anthracyclines. Cochrane Database of Systematic Reviews 2011; (6).  
<http://onlinelibrary.wiley.com/doi/10.1002/14651858.CD003917.pub4/abstract>.
303. van Dalen Elvira C, de Lijster Manou S, Leijssen Lieve GJ, et al. Minimally invasive surgery versus open surgery for the treatment of solid abdominal and thoracic neoplasms in children. Cochrane Database of Systematic Reviews 2015; (1).  
<http://onlinelibrary.wiley.com/doi/10.1002/14651858.CD008403.pub3/abstract>.
304. van Dalen Elvira C, Mank A, Leclercq E, et al. Low bacterial diet versus control diet to prevent infection in cancer patients treated with chemotherapy causing episodes of neutropenia. Cochrane Database of Systematic Reviews 2016; (4).  
<http://onlinelibrary.wiley.com/doi/10.1002/14651858.CD006247.pub3/abstract>.
305. van Dalen Elvira C, Raphaël Martine F, Caron Huib N, et al. Treatment including anthracyclines versus treatment not including anthracyclines for childhood cancer. Cochrane Database of Systematic Reviews 2014; (9).  
<http://onlinelibrary.wiley.com/doi/10.1002/14651858.CD006647.pub4/abstract>.
306. van Dalen Elvira C, van As Jorrit W, de Camargo B. Methotrexate for high-grade osteosarcoma in children and young adults. Cochrane Database of Systematic Reviews 2011; (5).  
<http://onlinelibrary.wiley.com/doi/10.1002/14651858.CD006325.pub3/abstract>.

307. van Dalen Elvira C, van der Pal Helena JH, Kremer Leontien CM. Different dosage schedules for reducing cardiotoxicity in people with cancer receiving anthracycline chemotherapy. Cochrane Database of Systematic Reviews 2016; (3).  
<http://onlinelibrary.wiley.com/doi/10.1002/14651858.CD005008.pub4/abstract>.
308. van de Wetering Fleur T, Verleye L, Andreyev HJN, et al. Non-surgical interventions for late rectal problems (proctopathy) of radiotherapy in people who have received radiotherapy to the pelvis. Cochrane Database of Systematic Reviews 2016; (4).  
<http://onlinelibrary.wiley.com/doi/10.1002/14651858.CD003455.pub2/abstract>.
309. van de Wetering Marianne D, van Woensel Job BM, Lawrie Theresa A. Prophylactic antibiotics for preventing Gram positive infections associated with long-term central venous catheters in oncology patients. Cochrane Database of Systematic Reviews 2013; (11).  
<http://onlinelibrary.wiley.com/doi/10.1002/14651858.CD003295.pub3/abstract>.
310. van der Heijden E, Lopes Alberto D, Bryant A, et al. Follow-up strategies after treatment (large loop excision of the transformation zone (LLETZ)) for cervical intraepithelial neoplasia (CIN): Impact of human papillomavirus (HPV) test. Cochrane Database of Systematic Reviews 2015; (1).  
<http://onlinelibrary.wiley.com/doi/10.1002/14651858.CD010757.pub2/abstract>.

311. van der Velden J, Fons G, Lawrie Theresa A. Primary groin irradiation versus primary groin surgery for early vulvar cancer. Cochrane Database of Systematic Reviews 2011; (5).  
<http://onlinelibrary.wiley.com/doi/10.1002/14651858.CD002224.pub2/abstract>.
312. Veeravagu A, Chang Steven D, Black Keith L, et al. Biopsy versus resection for the management of low-grade gliomas. Cochrane Database of Systematic Reviews 2013; (4).  
<http://onlinelibrary.wiley.com/doi/10.1002/14651858.CD009319.pub3/abstract>.
313. Vennix S, Pelzers L, Bouvy N, et al. Laparoscopic versus open total mesorectal excision for rectal cancer. Cochrane Database of Systematic Reviews 2014; (4).  
<http://onlinelibrary.wiley.com/doi/10.1002/14651858.CD005200.pub3/abstract>.
314. Vidal L, Ben dor I, Paul M, et al. Oral versus intravenous antibiotic treatment for febrile neutropenia in cancer patients. Cochrane Database of Systematic Reviews 2013; (10).  
<http://onlinelibrary.wiley.com/doi/10.1002/14651858.CD003992.pub3/abstract>.
315. Vidal L, Gafter-Gvili A, Gurion R, et al. Bendamustine for patients with indolent B cell lymphoid malignancies including chronic lymphocytic leukaemia. Cochrane Database of Systematic Reviews 2012; (9).  
<http://onlinelibrary.wiley.com/doi/10.1002/14651858.CD009045.pub2/abstract>.

316. Vinceti M, Dennert G, Crespi Catherine M, et al. Selenium for preventing cancer.

Cochrane Database of Systematic Reviews 2014; (3).

<http://onlinelibrary.wiley.com/doi/10.1002/14651858.CD005195.pub3/abstract>

317. Wagner Anna D, Thomssen C, Haerting J, et al. Vascular-endothelial-growth-factor (VEGF) targeting therapies for endocrine refractory or resistant metastatic breast cancer. Cochrane Database of Systematic Reviews 2012; (7).

<http://onlinelibrary.wiley.com/doi/10.1002/14651858.CD008941.pub2/abstract>

318. Walsh T, Liu Joseph LY, Brocklehurst P, et al. Clinical assessment to screen for the detection of oral cavity cancer and potentially malignant disorders in apparently healthy adults. Cochrane Database of Systematic Reviews 2013; (11).

<http://onlinelibrary.wiley.com/doi/10.1002/14651858.CD010173.pub2/abstract>

319. Wang Z, Chen J, Su K, et al. Abdominal drainage versus no drainage post-gastrectomy for gastric cancer. Cochrane Database of Systematic Reviews 2015; (5).

<http://onlinelibrary.wiley.com/doi/10.1002/14651858.CD008788.pub3/abstract>

320. Ward Evelyn J, Henry Lisa M, Friend Amanda J, et al. Nutritional support in children and young people with cancer undergoing chemotherapy. Cochrane Database of Systematic Reviews 2015; (8).

<http://onlinelibrary.wiley.com/doi/10.1002/14651858.CD003298.pub3/abstract>

321. Warner L, Chudasama J, Kelly Charles G, et al. Radiotherapy versus open surgery versus endolaryngeal surgery (with or without laser) for early laryngeal squamous cell cancer. Cochrane Database of Systematic Reviews 2014; (12).  
<http://onlinelibrary.wiley.com/doi/10.1002/14651858.CD002027.pub2/abstract>.
322. Weberschock T, Strametz R, Lorenz M, et al. Interventions for mycosis fungoides. Cochrane Database of Systematic Reviews 2012; (9).  
<http://onlinelibrary.wiley.com/doi/10.1002/14651858.CD008946.pub2/abstract>.
323. Wei Mao L, Kang D, Gu L, et al. Chemotherapy for thymic carcinoma and advanced thymoma in adults. Cochrane Database of Systematic Reviews 2013; (8).  
<http://onlinelibrary.wiley.com/doi/10.1002/14651858.CD008588.pub2/abstract>.
324. Weis S, Franke A, Berg T, et al. Percutaneous ethanol injection or percutaneous acetic acid injection for early hepatocellular carcinoma. Cochrane Database of Systematic Reviews 2015; (1).  
<http://onlinelibrary.wiley.com/doi/10.1002/14651858.CD006745.pub3/abstract>.
325. Weis S, Franke A, Mössner J, et al. Radiofrequency (thermal) ablation versus no intervention or other interventions for hepatocellular carcinoma. Cochrane Database of Systematic Reviews 2013; (12).  
<http://onlinelibrary.wiley.com/doi/10.1002/14651858.CD003046.pub3/abstract>.
326. Weitz M, Strahm B, Meerpohl Joerg J, et al. Extracorporeal photopheresis versus alternative treatment for chronic graft-versus-host disease after haematopoietic

stem cell transplantation in paediatric patients. Cochrane Database of Systematic Reviews 2015; (12).

<http://onlinelibrary.wiley.com/doi/10.1002/14651858.CD009898.pub3/abstract>

327. Weitz M, Strahm B, Meerpohl Joerg J, et al. Extracorporeal photopheresis versus standard treatment for acute graft-versus-host disease after haematopoietic stem cell transplantation in paediatric patients. Cochrane Database of Systematic Reviews 2015; (12).

<http://onlinelibrary.wiley.com/doi/10.1002/14651858.CD009759.pub3/abstract>

328. Wiffen Philip J, Derry S, Moore RA. Impact of morphine, fentanyl, oxycodone or codeine on patient consciousness, appetite and thirst when used to treat cancer pain. Cochrane Database of Systematic Reviews 2014; (5).

<http://onlinelibrary.wiley.com/doi/10.1002/14651858.CD011056.pub2/abstract>

329. Wiffen Philip J, Derry S, Naessens K, et al. Oral tapentadol for cancer pain. Cochrane Database of Systematic Reviews 2015; (9).

<http://onlinelibrary.wiley.com/doi/10.1002/14651858.CD011460.pub2/abstract>

330. Wiffen Philip J, Wee B, Moore RA. Oral morphine for cancer pain. Cochrane Database of Systematic Reviews 2016; (4).

<http://onlinelibrary.wiley.com/doi/10.1002/14651858.CD003868.pub4/abstract>

331. Wiggins Alison J, Cass Gemma KS, Bryant A, et al. Poly(ADP-ribose) polymerase (PARP) inhibitors for the treatment of ovarian cancer. Cochrane Database of



Systematic Reviews 2015; (5).

<http://onlinelibrary.wiley.com/doi/10.1002/14651858.CD007929.pub3/abstract>.

332. Williams C, Bryant A. Short versus long duration infusions of paclitaxel for any advanced adenocarcinoma. Cochrane Database of Systematic Reviews 2011; (5).

<http://onlinelibrary.wiley.com/doi/10.1002/14651858.CD003911.pub2/abstract>.

333. Wolf E, Milazzo S, Boehm K, et al. Thymic peptides for treatment of cancer patients. Cochrane Database of Systematic Reviews 2011; (2).

<http://onlinelibrary.wiley.com/doi/10.1002/14651858.CD003993.pub3/abstract>.

334. Wong Matthew HF, Stockler Martin R, Pavlakis N. Bisphosphonates and other bone agents for breast cancer. Cochrane Database of Systematic Reviews 2012; (2).

<http://onlinelibrary.wiley.com/doi/10.1002/14651858.CD003474.pub3/abstract>.

335. Woo Yin L, Kyrgiou M, Bryant A, et al. Centralisation of services for gynaecological cancer. Cochrane Database of Systematic Reviews 2012; (3).

<http://onlinelibrary.wiley.com/doi/10.1002/14651858.CD007945.pub2/abstract>.

336. Worthington Helen V, Clarkson Jan E, Bryan G, et al. Interventions for preventing oral mucositis for patients with cancer receiving treatment. Cochrane Database of Systematic Reviews 2011; (4).

<http://onlinelibrary.wiley.com/doi/10.1002/14651858.CD000978.pub5/abstract>.

337. Wulaningsih W, Wardhana A, Watkins J, et al. Irinotecan chemotherapy combined with fluoropyrimidines versus irinotecan alone for overall survival and progression-free survival in patients with advanced and/or metastatic colorectal cancer. Cochrane Database of Systematic Reviews 2016; (2).  
<http://onlinelibrary.wiley.com/doi/10.1002/14651858.CD008593.pub3/abstract>.
338. Yalçın B, Kremer Leontien CM, van Dalen Elvira C. High-dose chemotherapy and autologous haematopoietic stem cell rescue for children with high-risk neuroblastoma. Cochrane Database of Systematic Reviews 2015; (10).  
<http://onlinelibrary.wiley.com/doi/10.1002/14651858.CD006301.pub4/abstract>.
339. Yang J, Zhu L, Wu Z, et al. Chinese herbal medicines for induction of remission in advanced or late gastric cancer. Cochrane Database of Systematic Reviews 2013; (4).  
<http://onlinelibrary.wiley.com/doi/10.1002/14651858.CD005096.pub4/abstract>.
340. Yang S, Wu S, Huang Y, et al. Screening for oesophageal cancer. Cochrane Database of Systematic Reviews 2012; (12).  
<http://onlinelibrary.wiley.com/doi/10.1002/14651858.CD007883.pub2/abstract>.
341. Yang S, Wu S, Zhou J, et al. Screening for nasopharyngeal cancer. Cochrane Database of Systematic Reviews 2015; (11).  
<http://onlinelibrary.wiley.com/doi/10.1002/14651858.CD008423.pub2/abstract>.

342. Yang Z-Y, Liu L, Mao C, et al. Chemotherapy with cetuximab versus chemotherapy alone for chemotherapy-naive advanced non-small cell lung cancer. Cochrane Database of Systematic Reviews 2014; (11).  
<http://onlinelibrary.wiley.com/doi/10.1002/14651858.CD009948.pub2/abstract>.
343. Yuan Y, Zeng X, Hu Y, et al. Omentoplasty for oesophagostomy after oesophagectomy. Cochrane Database of Systematic Reviews 2014; (10).  
<http://onlinelibrary.wiley.com/doi/10.1002/14651858.CD008446.pub3/abstract>.
344. Zacher J, Kasenda B, Engert A, et al. The role of additional radiotherapy for primary central nervous system lymphoma. Cochrane Database of Systematic Reviews 2014; (6).  
<http://onlinelibrary.wiley.com/doi/10.1002/14651858.CD009211.pub2/abstract>.
345. Zani Emerson L, Clark Otavio Augusto C, Rodrigues Netto Jr N. Antibiotic prophylaxis for transrectal prostate biopsy. Cochrane Database of Systematic Reviews 2011; (5).  
<http://onlinelibrary.wiley.com/doi/10.1002/14651858.CD006576.pub2/abstract>.
346. Zhong Jian H, Li Le Q, Wu Liu C. Lamivudine with or without adefovir dipivoxil for postoperative hepatocellular carcinoma. Cochrane Database of Systematic Reviews 2011; (12).  
<http://onlinelibrary.wiley.com/doi/10.1002/14651858.CD008713.pub2/abstract>.

*High impact journal SRs*

1. Menarche, menopause, and breast cancer risk: individual participant meta-analysis, including 118 964 women with breast cancer from 117 epidemiological studies. *The Lancet Oncology* 2012;13(11):1141-51.
2. Preoperative chemotherapy for non-small-cell lung cancer: a systematic review and meta-analysis of individual participant data. *Lancet (London, England)* 2014;383(9928):1561-71.
3. Endometrial cancer and oral contraceptives: an individual participant meta-analysis of 27 276 women with endometrial cancer from 36 epidemiological studies. *The Lancet Oncology* 2015;16(9):1061-70.
4. Ahmed M, Purushotham AD, Douek M. Novel techniques for sentinel lymph node biopsy in breast cancer: a systematic review. *The Lancet Oncology* 2014;15(8):e351-62.
5. Al Khabori M, de Almeida JR, Guyatt GH, et al. Autologous stem cell transplantation in follicular lymphoma: a systematic review and meta-analysis. *Journal of the National Cancer Institute* 2012;104(1):18-28.
6. Algra AM, Rothwell PM. Effects of regular aspirin on long-term cancer incidence and metastasis: a systematic comparison of evidence from observational studies versus randomised trials. *The Lancet Oncology* 2012;13(5):518-27.
7. Amir E, Seruga B, Niraula S, et al. Toxicity of adjuvant endocrine therapy in postmenopausal breast cancer patients: a systematic review and meta-analysis. *Journal of the National Cancer Institute* 2011;103(17):1299-309.

8. Arbyn M, Verdoodt F, Snijders PJ, et al. Accuracy of human papillomavirus testing on self-collected versus clinician-collected samples: a meta-analysis. *The Lancet Oncology* 2014;15(2):172-83.
9. Aune D, Chan DS, Lau R, et al. Dietary fibre, whole grains, and risk of colorectal cancer: systematic review and dose-response meta-analysis of prospective studies. *BMJ (Clinical research ed)* 2011;343:d6617.
10. Bach, Smith-Bindman R, Wood DE, et al. Benefits and harms of CT screening for lung cancer: a systematic review. *Jama* 2012;307(22):2418-29.
11. Baldwin C, Spiro A, Ahern R, et al. Oral nutritional interventions in malnourished patients with cancer: a systematic review and meta-analysis. *Journal of the National Cancer Institute* 2012;104(5):371-85.
12. Ballard-Barbash R, Friedenreich CM, Courneya KS, et al. Physical activity, biomarkers, and disease outcomes in cancer survivors: a systematic review. *Journal of the National Cancer Institute* 2012;104(11):815-40.
13. Bangalore S, Kumar S, Kjeldsen SE, et al. Antihypertensive drugs and risk of cancer: network meta-analyses and trial sequential analyses of 324,168 participants from randomised trials. *The Lancet Oncology* 2011;12(1):65-82.
14. Bao Y, Michaud DS, Spiegelman D, et al. Folate intake and risk of pancreatic cancer: pooled analysis of prospective cohort studies. *Journal of the National Cancer Institute* 2011;103(24):1840-50.

15. Beral V, Gaitskell K, Hermon C, et al. Ovarian cancer and smoking: individual participant meta-analysis including 28,114 women with ovarian cancer from 51 epidemiological studies. *The Lancet Oncology* 2012;13(9):946-56.
16. Beral V, Gaitskell K, Hermon C, et al. Menopausal hormone use and ovarian cancer risk: individual participant meta-analysis of 52 epidemiological studies. *Lancet (London, England)* 2015;385(9980):1835-42.
17. Biagi JJ, Raphael MJ, Mackillop WJ, et al. Association between time to initiation of adjuvant chemotherapy and survival in colorectal cancer: a systematic review and meta-analysis. *Jama* 2011;305(22):2335-42.
18. Blanchard P, Bourhis J, Lacas B, et al. Taxane-cisplatin-fluorouracil as induction chemotherapy in locally advanced head and neck cancers: an individual patient data meta-analysis of the meta-analysis of chemotherapy in head and neck cancer group. *Journal of clinical oncology : official journal of the American Society of Clinical Oncology* 2013;31(23):2854-60.
19. Blanchard P, Lee A, Marguet S, et al. Chemotherapy and radiotherapy in nasopharyngeal carcinoma: an update of the MAC-NPC meta-analysis. *The Lancet Oncology* 2015;16(6):645-55.
20. Blanke CD, Bot BM, Thomas DM, et al. Impact of young age on treatment efficacy and safety in advanced colorectal cancer: a pooled analysis of patients from nine first-line phase III chemotherapy trials. *Journal of clinical oncology : official journal of the American Society of Clinical Oncology* 2011;29(20):2781-6.
21. Blumenthal GM, Karuri SW, Zhang H, et al. Overall response rate, progression-free survival, and overall survival with targeted and standard therapies in advanced non-

small-cell lung cancer: US Food and Drug Administration trial-level and patient-level analyses. *Journal of clinical oncology : official journal of the American Society of Clinical Oncology* 2015;33(9):1008-14.

22. Boehmer U, Cooley TP, Clark MA. Cancer and men who have sex with men: a systematic review. *The Lancet Oncology* 2012;13(12):e545-53.

23. Bolton KL, Chenevix-Trench G, Goh C, et al. Association between BRCA1 and BRCA2 mutations and survival in women with invasive epithelial ovarian cancer. *Jama* 2012;307(4):382-90.

24. Boniol M, Autier P, Boyle P, et al. Cutaneous melanoma attributable to sunbed use: systematic review and meta-analysis. *BMJ (Clinical research ed)* 2012;345:e4757.

25. Bourhis J, Blanchard P, Maillard E, et al. Effect of amifostine on survival among patients treated with radiotherapy: a meta-analysis of individual patient data. *Journal of clinical oncology : official journal of the American Society of Clinical Oncology* 2011;29(18):2590-7.

26. Bowers DC, Nathan PC, Constine L, et al. Subsequent neoplasms of the CNS among survivors of childhood cancer: a systematic review. *The Lancet Oncology* 2013;14(8):e321-8.

27. Boyle T, Keegel T, Bull F, et al. Physical activity and risks of proximal and distal colon cancers: a systematic review and meta-analysis. *Journal of the National Cancer Institute* 2012;104(20):1548-61.

28. Brasme JF, Morfouace M, Grill J, et al. Delays in diagnosis of paediatric cancers: a systematic review and comparison with expert testimony in lawsuits. *The Lancet Oncology* 2012;13(10):e445-59.
29. Brenner H, Stock C, Hoffmeister M. Effect of screening sigmoidoscopy and screening colonoscopy on colorectal cancer incidence and mortality: systematic review and meta-analysis of randomised controlled trials and observational studies. *BMJ (Clinical research ed)* 2014;348:g2467.
30. Breugom AJ, Swets M, Bosset JF, et al. Adjuvant chemotherapy after preoperative (chemo)radiotherapy and surgery for patients with rectal cancer: a systematic review and meta-analysis of individual patient data. *The Lancet Oncology* 2015;16(2):200-7.
31. Brinton LA, Cook MB, McCormack V, et al. Anthropometric and hormonal risk factors for male breast cancer: male breast cancer pooling project results. *Journal of the National Cancer Institute* 2014;106(3):djt465.
32. Castellsague X, Diaz M, Vaccarella S, et al. Intrauterine device use, cervical infection with human papillomavirus, and risk of cervical cancer: a pooled analysis of 26 epidemiological studies. *The Lancet Oncology* 2011;12(11):1023-31.
33. Castillo JJ, Dalia S, Shum H. Meta-analysis of the association between cigarette smoking and incidence of Hodgkin's Lymphoma. *Journal of clinical oncology : official journal of the American Society of Clinical Oncology* 2011;29(29):3900-6.
34. Chatzinasiou F, Lill CM, Kypreou K, et al. Comprehensive field synopsis and systematic meta-analyses of genetic association studies in cutaneous melanoma. *Journal of the National Cancer Institute* 2011;103(16):1227-35.



35. Chellapandian D, Lehrnbecher T, Phillips B, et al. Bronchoalveolar lavage and lung biopsy in patients with cancer and hematopoietic stem-cell transplantation recipients: a systematic review and meta-analysis. *Journal of clinical oncology : official journal of the American Society of Clinical Oncology* 2015;33(5):501-9.
36. Chen LS, Hung RJ, Baker T, et al. CHRNA5 risk variant predicts delayed smoking cessation and earlier lung cancer diagnosis--a meta-analysis. *Journal of the National Cancer Institute* 2015;107(5).
37. Choueiri TK, Mayer EL, Je Y, et al. Congestive heart failure risk in patients with breast cancer treated with bevacizumab. *Journal of clinical oncology : official journal of the American Society of Clinical Oncology* 2011;29(6):632-8.
38. Chowdhury R, Kunutsor S, Vitezova A, et al. Vitamin D and risk of cause specific death: systematic review and meta-analysis of observational cohort and randomised intervention studies. *BMJ (Clinical research ed)* 2014;348:g1903.
39. Church DN, Stelloo E, Nout RA, et al. Prognostic significance of POLE proofreading mutations in endometrial cancer. *Journal of the National Cancer Institute* 2015;107(1):402.
40. Coleman R, Powles T, Paterson A, et al. Adjuvant bisphosphonate treatment in early breast cancer: meta-analyses of individual patient data from randomised trials. *Lancet (London, England)* 2015;386(10001):1353-61.
41. Collins M, Wilhelm M, Conyers R, et al. Benefits and adverse events in younger versus older patients receiving neoadjuvant chemotherapy for osteosarcoma: findings from a meta-analysis. *Journal of clinical oncology : official journal of the American Society of Clinical Oncology* 2013;31(18):2303-12.

42. Coory M, White VM, Johnson KS, et al. Systematic review of quality improvement interventions directed at cancer specialists. *Journal of clinical oncology : official journal of the American Society of Clinical Oncology* 2013;31(12):1583-91.
43. Cortazar P, Zhang L, Untch M, et al. Pathological complete response and long-term clinical benefit in breast cancer: the CTNeoBC pooled analysis. *Lancet (London, England)* 2014;384(9938):164-72.
44. Crowe FL, Appleby PN, Travis RC, et al. Circulating fatty acids and prostate cancer risk: individual participant meta-analysis of prospective studies. *Journal of the National Cancer Institute* 2014;106(9).
45. Cuzick J, Sestak I, Bonanni B, et al. Selective oestrogen receptor modulators in prevention of breast cancer: an updated meta-analysis of individual participant data. *Lancet (London, England)* 2013;381(9880):1827-34.
46. Dabestani S, Marconi L, Hofmann F, et al. Local treatments for metastases of renal cell carcinoma: a systematic review. *The Lancet Oncology* 2014;15(12):e549-61.
47. D'Amico AV, Chen MH, de Castro M, et al. Surrogate endpoints for prostate cancer-specific mortality after radiotherapy and androgen suppression therapy in men with localised or locally advanced prostate cancer: an analysis of two randomised trials. *The Lancet Oncology* 2012;13(2):189-95.
48. Darby S, McGale P, Correa C, et al. Effect of radiotherapy after breast-conserving surgery on 10-year recurrence and 15-year breast cancer death: meta-analysis of individual patient data for 10,801 women in 17 randomised trials. *Lancet (London, England)* 2011;378(9804):1707-16.

49. Davies C, Godwin J, Gray R, et al. Relevance of breast cancer hormone receptors and other factors to the efficacy of adjuvant tamoxifen: patient-level meta-analysis of randomised trials. *Lancet (London, England)* 2011;378(9793):771-84.
50. de Jong MC, Kors WA, de Graaf P, et al. Trilateral retinoblastoma: a systematic review and meta-analysis. *The Lancet Oncology* 2014;15(10):1157-67.
51. De Witt Hamer PC, Robles SG, Zwinderman AH, et al. Impact of intraoperative stimulation brain mapping on glioma surgery outcome: a meta-analysis. *Journal of clinical oncology : official journal of the American Society of Clinical Oncology* 2012;30(20):2559-65.
52. Deppen SA, Blume JD, Kensinger CD, et al. Accuracy of FDG-PET to diagnose lung cancer in areas with infectious lung disease: a meta-analysis. *Jama* 2014;312(12):1227-36.
53. Di Leo A, Desmedt C, Bartlett JM, et al. HER2 and TOP2A as predictive markers for anthracycline-containing chemotherapy regimens as adjuvant treatment of breast cancer: a meta-analysis of individual patient data. *The Lancet Oncology* 2011;12(12):1134-42.
54. DiSipio T, Rye S, Newman B, et al. Incidence of unilateral arm lymphoedema after breast cancer: a systematic review and meta-analysis. *The Lancet Oncology* 2013;14(6):500-15.
55. dos Santos LV, Souza FH, Brunetto AT, et al. Neurokinin-1 receptor antagonists for chemotherapy-induced nausea and vomiting: a systematic review. *Journal of the National Cancer Institute* 2012;104(17):1280-92.

56. Dowsett M, Forbes JF, Bradley R, et al. Aromatase inhibitors versus tamoxifen in early breast cancer: patient-level meta-analysis of the randomised trials. *Lancet* (London, England) 2015;386(10001):1341-52.
57. Eisen T, Sternberg CN, Robert C, et al. Targeted therapies for renal cell carcinoma: review of adverse event management strategies. *Journal of the National Cancer Institute* 2012;104(2):93-113.
58. Eliassen AH, Hendrickson SJ, Brinton LA, et al. Circulating carotenoids and risk of breast cancer: pooled analysis of eight prospective studies. *Journal of the National Cancer Institute* 2012;104(24):1905-16.
59. Engelhardt EG, Garvelink MM, de Haes JH, et al. Predicting and communicating the risk of recurrence and death in women with early-stage breast cancer: a systematic review of risk prediction models. *Journal of clinical oncology : official journal of the American Society of Clinical Oncology* 2014;32(3):238-50. doi: 10.1200/jco.2013.50.3417
60. Faller H, Schuler M, Richard M, et al. Effects of psycho-oncologic interventions on emotional distress and quality of life in adult patients with cancer: systematic review and meta-analysis. *Journal of clinical oncology : official journal of the American Society of Clinical Oncology* 2013;31(6):782-93.
61. Fokom-Domgue J, Combescure C, Fokom-Defo V, et al. Performance of alternative strategies for primary cervical cancer screening in sub-Saharan Africa: systematic review and meta-analysis of diagnostic test accuracy studies. *BMJ (Clinical research ed)* 2015;351:h3084.

62. Fong DY, Ho JW, Hui BP, et al. Physical activity for cancer survivors: meta-analysis of randomised controlled trials. *BMJ (Clinical research ed)* 2012;344:e70.
63. Ford AC, Forman D, Hunt RH, et al. Helicobacter pylori eradication therapy to prevent gastric cancer in healthy asymptomatic infected individuals: systematic review and meta-analysis of randomised controlled trials. *BMJ (Clinical research ed)* 2014;348:g3174.
64. Freese KE, Kokai L, Edwards RP, et al. Adipose-derived stems cells and their role in human cancer development, growth, progression, and metastasis: a systematic review. *Cancer research* 2015;75(7):1161-8.
65. Friebel TM, Domchek SM, Rebbeck TR. Modifiers of cancer risk in BRCA1 and BRCA2 mutation carriers: systematic review and meta-analysis. *Journal of the National Cancer Institute* 2014;106(6):dju091.
66. Garcia MK, McQuade J, Haddad R, et al. Systematic review of acupuncture in cancer care: a synthesis of the evidence. *Journal of clinical oncology : official journal of the American Society of Clinical Oncology* 2013;31(7):952-60.
67. Gardner JR, Livingston PM, Fraser SF. Effects of exercise on treatment-related adverse effects for patients with prostate cancer receiving androgen-deprivation therapy: a systematic review. *Journal of clinical oncology : official journal of the American Society of Clinical Oncology* 2014;32(4):335-46.
68. Gennari A, Stockler M, Puntoni M, et al. Duration of chemotherapy for metastatic breast cancer: a systematic review and meta-analysis of randomized clinical trials. *Journal of clinical oncology : official journal of the American Society of Clinical Oncology* 2011;29(16):2144-9.

69. Ghesquieres H, Slager SL, Jardin F, et al. Genome-Wide Association Study of Event-Free Survival in Diffuse Large B-Cell Lymphoma Treated With Immunochemotherapy. *Journal of clinical oncology : official journal of the American Society of Clinical Oncology* 2015;33(33):3930-7.
70. Greco MT, Roberto A, Corli O, et al. Quality of cancer pain management: an update of a systematic review of undertreatment of patients with cancer. *Journal of clinical oncology : official journal of the American Society of Clinical Oncology* 2014;32(36):4149-54.
71. Green J, Cairns BJ, Casabonne D, et al. Height and cancer incidence in the Million Women Study: prospective cohort, and meta-analysis of prospective studies of height and total cancer risk. *The Lancet Oncology* 2011;12(8):785-94.
72. Gupta S, Hunsberger S, Boerner SA, et al. Meta-analysis of the relationship between dose and benefit in phase I targeted agent trials. *Journal of the National Cancer Institute* 2012;104(24):1860-6.
73. Hamaker ME, Jonker JM, de Rooij SE, et al. Frailty screening methods for predicting outcome of a comprehensive geriatric assessment in elderly patients with cancer: a systematic review. *The Lancet Oncology* 2012;13(10):e437-44.
74. Hart SL, Hoyt MA, Diefenbach M, et al. Meta-analysis of efficacy of interventions for elevated depressive symptoms in adults diagnosed with cancer. *Journal of the National Cancer Institute* 2012;104(13):990-1004.
75. Hayes JH, Barry MJ. Screening for prostate cancer with the prostate-specific antigen test: a review of current evidence. *Jama* 2014;311(11):1143-9.

76. Heikkila K, Nyberg ST, Theorell T, et al. Work stress and risk of cancer: meta-analysis of 5700 incident cancer events in 116,000 European men and women. *BMJ (Clinical research ed)* 2013;346:f165.
77. Heine JJ, Scott CG, Sellers TA, et al. A novel automated mammographic density measure and breast cancer risk. *Journal of the National Cancer Institute* 2012;104(13):1028-37.
78. Heleno B, Thomsen MF, Rodrigues DS, et al. Quantification of harms in cancer screening trials: literature review. *BMJ (Clinical research ed)* 2013;347:f5334.
79. Henson KE, Jagsi R, Cutter D, et al. Inferring the Effects of Cancer Treatment: Divergent Results From Early Breast Cancer Trialists' Collaborative Group Meta-Analyses of Randomized Trials and Observational Data From SEER Registries. *Journal of clinical oncology : official journal of the American Society of Clinical Oncology* 2016.
80. Henson LA, Gao W, Higginson IJ, et al. Emergency department attendance by patients with cancer in their last month of life: a systematic review and meta-analysis. *Journal of clinical oncology : official journal of the American Society of Clinical Oncology* 2015;33(4):370-6.
81. Hills RK, Castaigne S, Appelbaum FR, et al. Addition of gemtuzumab ozogamicin to induction chemotherapy in adult patients with acute myeloid leukaemia: a meta-analysis of individual patient data from randomised controlled trials. *The Lancet Oncology* 2014;15(9):986-96.
82. Hollevoet K, Reitsma JB, Creaney J, et al. Serum mesothelin for diagnosing malignant pleural mesothelioma: an individual patient data meta-analysis. *Journal of clinical*

oncology : official journal of the American Society of Clinical Oncology

2012;30(13):1541-9.

83. Horgan AM, Amir E, Walter T, et al. Adjuvant therapy in the treatment of biliary tract cancer: a systematic review and meta-analysis. *Journal of clinical oncology : official journal of the American Society of Clinical Oncology* 2012;30(16):1934-40.

84. Hornberger J, Alvarado MD, Rebecca C, et al. Clinical validity/utility, change in practice patterns, and economic implications of risk stratifiers to predict outcomes for early-stage breast cancer: a systematic review. *Journal of the National Cancer Institute* 2012;104(14):1068-79.

85. Horowitz NA, Benyamini N, Wohlfart K, et al. Reproductive organ involvement in non-Hodgkin lymphoma during pregnancy: a systematic review. *The Lancet Oncology* 2013;14(7):e275-82.

86. Houssami N, Turner R, Macaskill P, et al. An individual person data meta-analysis of preoperative magnetic resonance imaging and breast cancer recurrence. *Journal of clinical oncology : official journal of the American Society of Clinical Oncology* 2014;32(5):392-401.

87. Howard-Anderson J, Ganz PA, Bower JE, et al. Quality of life, fertility concerns, and behavioral health outcomes in younger breast cancer survivors: a systematic review. *Journal of the National Cancer Institute* 2012;104(5):386-405.

88. Hurwitz HI, Saltz LB, Van Cutsem E, et al. Venous thromboembolic events with chemotherapy plus bevacizumab: a pooled analysis of patients in randomized phase II and III studies. *Journal of clinical oncology : official journal of the American Society of Clinical Oncology* 2011;29(13):1757-64.



89. Jenkins MA, Dowty JG, Ait Ouakrim D, et al. Short-term risk of colorectal cancer in individuals with lynch syndrome: a meta-analysis. *Journal of clinical oncology : official journal of the American Society of Clinical Oncology* 2015;33(4):326-31.
90. Jim HS, Phillips KM, Chait S, et al. Meta-analysis of cognitive functioning in breast cancer survivors previously treated with standard-dose chemotherapy. *Journal of clinical oncology : official journal of the American Society of Clinical Oncology* 2012;30(29):3578-87.
91. Joensuu H, Vehtari A, Riihimaki J, et al. Risk of recurrence of gastrointestinal stromal tumour after surgery: an analysis of pooled population-based cohorts. *The Lancet Oncology* 2012;13(3):265-74.
92. Jung S, Spiegelman D, Baglietto L, et al. Fruit and vegetable intake and risk of breast cancer by hormone receptor status. *Journal of the National Cancer Institute* 2013;105(3):219-36.
93. Kamangar F, Shakeri R, Malekzadeh R, et al. Opium use: an emerging risk factor for cancer? *The Lancet Oncology* 2014;15(2):e69-77.
94. Keum N, Greenwood DC, Lee DH, et al. Adult weight gain and adiposity-related cancers: a dose-response meta-analysis of prospective observational studies. *Journal of the National Cancer Institute* 2015;107(2).
95. Kiely BE, Soon YY, Tattersall MH, et al. How long have I got? Estimating typical, best-case, and worst-case scenarios for patients starting first-line chemotherapy for metastatic breast cancer: a systematic review of recent randomized trials. *Journal of clinical oncology : official journal of the American Society of Clinical Oncology* 2011;29(4):456-63.

96. Knoll GA, Kokolo MB, Mallick R, et al. Effect of sirolimus on malignancy and survival after kidney transplantation: systematic review and meta-analysis of individual patient data. *BMJ (Clinical research ed)* 2014;349:g6679.
97. Kolahdooz F, Jang SL, Corriveau A, et al. Knowledge, attitudes, and behaviours towards cancer screening in indigenous populations: a systematic review. *The Lancet Oncology* 2014;15(11):e504-16.
98. Kong A, Johnson N, Kitchener HC, et al. Adjuvant radiotherapy for stage I endometrial cancer: an updated Cochrane systematic review and meta-analysis. *Journal of the National Cancer Institute* 2012;104(21):1625-34.
99. Kotecha RS, Pascoe EM, Rushing EJ, et al. Meningiomas in children and adolescents: a meta-analysis of individual patient data. *The Lancet Oncology* 2011;12(13):1229-39.
100. Kotronoulas G, Kearney N, Maguire R, et al. What is the value of the routine use of patient-reported outcome measures toward improvement of patient outcomes, processes of care, and health service outcomes in cancer care? A systematic review of controlled trials. *Journal of clinical oncology : official journal of the American Society of Clinical Oncology* 2014;32(14):1480-501.
101. Kubben PL, ter Meulen KJ, Schijns OE, et al. Intraoperative MRI-guided resection of glioblastoma multiforme: a systematic review. *The Lancet Oncology* 2011;12(11):1062-70.
102. Kumar N, Chen Y, Zaw AS, et al. Use of intraoperative cell-salvage for autologous blood transfusions in metastatic spine tumour surgery: a systematic review. *The Lancet Oncology* 2014;15(1):e33-41.

103. Kyrgiou M, Mitra A, Arbyn M, et al. Fertility and early pregnancy outcomes after treatment for cervical intraepithelial neoplasia: systematic review and meta-analysis. *BMJ (Clinical research ed)* 2014;349:g6192.
104. Lallas A, Kyrgidis A, Ferrara G, et al. Atypical Spitz tumours and sentinel lymph node biopsy: a systematic review. *The Lancet Oncology* 2014;15(4):e178-83.
105. Lansbury L, Bath-Hextall F, Perkins W, et al. Interventions for non-metastatic squamous cell carcinoma of the skin: systematic review and pooled analysis of observational studies. *BMJ (Clinical research ed)* 2013;347:f6153.
106. Laurie SA, Ho AL, Fury MG, et al. Systemic therapy in the management of metastatic or locally recurrent adenoid cystic carcinoma of the salivary glands: a systematic review. *The Lancet Oncology* 2011;12(8):815-24.
107. Lavigne E, Holowaty EJ, Pan SY, et al. Breast cancer detection and survival among women with cosmetic breast implants: systematic review and meta-analysis of observational studies. *BMJ (Clinical research ed)* 2013;346:f2399.
108. Lee CK, Brown C, Gralla RJ, et al. Impact of EGFR inhibitor in non-small cell lung cancer on progression-free and overall survival: a meta-analysis. *Journal of the National Cancer Institute* 2013;105(9):595-605.
109. Lee CK, Wu YL, Ding PN, et al. Impact of Specific Epidermal Growth Factor Receptor (EGFR) Mutations and Clinical Characteristics on Outcomes After Treatment With EGFR Tyrosine Kinase Inhibitors Versus Chemotherapy in EGFR-Mutant Lung Cancer: A Meta-Analysis. *Journal of clinical oncology : official journal of the American Society of Clinical Oncology* 2015;33(17):1958-65.

110. Lee JK, Hahn S, Kim DW, et al. Epidermal growth factor receptor tyrosine kinase inhibitors vs conventional chemotherapy in non-small cell lung cancer harboring wild-type epidermal growth factor receptor: a meta-analysis. *Jama* 2014;311(14):1430-7.
111. Lee L, Cheung WY, Atkinson E, et al. Impact of comorbidity on chemotherapy use and outcomes in solid tumors: a systematic review. *Journal of clinical oncology : official journal of the American Society of Clinical Oncology* 2011;29(1):106-17.
112. Lee SJ, Boscardin WJ, Stijacic-Cenzer I, et al. Time lag to benefit after screening for breast and colorectal cancer: meta-analysis of survival data from the United States, Sweden, United Kingdom, and Denmark. *BMJ (Clinical research ed)* 2013;346:e8441.
113. Liao WC, Chien KL, Lin YL, et al. Adjuvant treatments for resected pancreatic adenocarcinoma: a systematic review and network meta-analysis. *The Lancet Oncology* 2013;14(11):1095-103.
114. Liao WC, Tu YK, Wu MS, et al. Blood glucose concentration and risk of pancreatic cancer: systematic review and dose-response meta-analysis. *BMJ (Clinical research ed)* 2015;349:g7371.
115. Lippitz BE. Cytokine patterns in patients with cancer: a systematic review. *The Lancet Oncology* 2013;14(6):e218-28.
116. Lopez-Olivo MA, Tayar JH, Martinez-Lopez JA, et al. Risk of malignancies in patients with rheumatoid arthritis treated with biologic therapy: a meta-analysis. *Jama* 2012;308(9):898-908.

117. Lockett T, Goldstein D, Butow PN, et al. Psychological morbidity and quality of life of ethnic minority patients with cancer: a systematic review and meta-analysis. *The Lancet Oncology* 2011;12(13):1240-8.
118. Ma Y, Zhang P, Wang F, et al. Association between vitamin D and risk of colorectal cancer: a systematic review of prospective studies. *Journal of clinical oncology : official journal of the American Society of Clinical Oncology* 2011;29(28):3775-82.
119. Machalek DA, Poynten M, Jin F, et al. Anal human papillomavirus infection and associated neoplastic lesions in men who have sex with men: a systematic review and meta-analysis. *The Lancet Oncology* 2012;13(5):487-500.
120. Mak RH, Hunt D, Shipley WU, et al. Long-term outcomes in patients with muscle-invasive bladder cancer after selective bladder-preserving combined-modality therapy: a pooled analysis of Radiation Therapy Oncology Group protocols 8802, 8903, 9506, 9706, 9906, and 0233. *Journal of clinical oncology : official journal of the American Society of Clinical Oncology* 2014;32(34):3801-9.
121. Maltoni M, Scarpi E, Rosati M, et al. Palliative sedation in end-of-life care and survival: a systematic review. *Journal of clinical oncology : official journal of the American Society of Clinical Oncology* 2012;30(12):1378-83.
122. Manceau G, Karoui M, Werner A, et al. Comparative outcomes of rectal cancer surgery between elderly and non-elderly patients: a systematic review. *The Lancet Oncology* 2012;13(12):e525-36.
123. Marinovich ML, Houssami N, Macaskill P, et al. Meta-analysis of magnetic resonance imaging in detecting residual breast cancer after neoadjuvant therapy. *Journal of the National Cancer Institute* 2013;105(5):321-33.

124. Markar SR, Wiggins T, Ni M, et al. Assessment of the quality of surgery within randomised controlled trials for the treatment of gastro-oesophageal cancer: a systematic review. *The Lancet Oncology* 2015;16(1):e23-31.
125. Martin-Doyle W, Leow JJ, Orsola A, et al. Improving selection criteria for early cystectomy in high-grade t1 bladder cancer: a meta-analysis of 15,215 patients. *Journal of clinical oncology : official journal of the American Society of Clinical Oncology* 2015;33(6):643-50.
126. Mauguen A, Le Pechoux C, Saunders MI, et al. Hyperfractionated or accelerated radiotherapy in lung cancer: an individual patient data meta-analysis. *Journal of clinical oncology : official journal of the American Society of Clinical Oncology* 2012;30(22):2788-97.
127. McGale P, Taylor C, Correa C, et al. Effect of radiotherapy after mastectomy and axillary surgery on 10-year recurrence and 20-year breast cancer mortality: meta-analysis of individual patient data for 8135 women in 22 randomised trials. *Lancet (London, England)* 2014;383(9935):2127-35.
128. Meulendijks D, Henricks LM, Sonke GS, et al. Clinical relevance of DPYD variants c.1679T>G, c.1236G>A/HapB3, and c.1601G>A as predictors of severe fluoropyrimidine-associated toxicity: a systematic review and meta-analysis of individual patient data. *The Lancet Oncology* 2015;16(16):1639-50.
129. Mitchell AJ, Chan M, Bhatti H, et al. Prevalence of depression, anxiety, and adjustment disorder in oncological, haematological, and palliative-care settings: a meta-analysis of 94 interview-based studies. *The Lancet Oncology* 2011;12(2):160-74.

130. Mitchell AJ, Ferguson DW, Gill J, et al. Depression and anxiety in long-term cancer survivors compared with spouses and healthy controls: a systematic review and meta-analysis. *The Lancet Oncology* 2013;14(8):721-32.
131. Mocellin S, Pilati P, Briarava M, et al. Breast Cancer Chemoprevention: A Network Meta-Analysis of Randomized Controlled Trials. *Journal of the National Cancer Institute* 2016;108(2).
132. Mocellin S, Verdi D, Pooley KA, et al. Telomerase reverse transcriptase locus polymorphisms and cancer risk: a field synopsis and meta-analysis. *Journal of the National Cancer Institute* 2012;104(11):840-54.
133. Moorman PG, Havrilesky LJ, Gierisch JM, et al. Oral contraceptives and risk of ovarian cancer and breast cancer among high-risk women: a systematic review and meta-analysis. *Journal of clinical oncology : official journal of the American Society of Clinical Oncology* 2013;31(33):4188-98.
134. Myers ER, Moorman P, Gierisch JM, et al. Benefits and Harms of Breast Cancer Screening: A Systematic Review. *Jama* 2015;314(15):1615-34.
135. Nagayama A, Hayashida T, Jinno H, et al. Comparative effectiveness of neoadjuvant therapy for HER2-positive breast cancer: a network meta-analysis. *Journal of the National Cancer Institute* 2014;106(9).
136. Nair VS, Maeda LS, Ioannidis JP. Clinical outcome prediction by microRNAs in human cancer: a systematic review. *Journal of the National Cancer Institute* 2012;104(7):528-40.

137. Ndiaye C, Mena M, Alemany L, et al. HPV DNA, E6/E7 mRNA, and p16INK4a detection in head and neck cancers: a systematic review and meta-analysis. *The Lancet Oncology* 2014;15(12):1319-31.
138. Nguyen PL, Je Y, Schutz FA, et al. Association of androgen deprivation therapy with cardiovascular death in patients with prostate cancer: a meta-analysis of randomized trials. *Jama* 2011;306(21):2359-66.
139. Niraula S, Amir E, Vera-Badillo F, et al. Risk of incremental toxicities and associated costs of new anticancer drugs: a meta-analysis. *Journal of clinical oncology : official journal of the American Society of Clinical Oncology* 2014;32(32):3634-42.
140. Niraula S, Le LW, Tannock IF. Treatment of prostate cancer with intermittent versus continuous androgen deprivation: a systematic review of randomized trials. *Journal of clinical oncology : official journal of the American Society of Clinical Oncology* 2013;31(16):2029-36.
141. Niraula S, Seruga B, Ocana A, et al. The price we pay for progress: a meta-analysis of harms of newly approved anticancer drugs. *Journal of clinical oncology : official journal of the American Society of Clinical Oncology* 2012;30(24):3012-9.
142. Oba K, Paoletti X, Alberts S, et al. Disease-free survival as a surrogate for overall survival in adjuvant trials of gastric cancer: a meta-analysis. *Journal of the National Cancer Institute* 2013;105(21):1600-7.
143. Ocana A, Vera-Badillo F, Seruga B, et al. HER3 overexpression and survival in solid tumors: a meta-analysis. *Journal of the National Cancer Institute* 2013;105(4):266-73.



144. Ohri N, Shen X, Dicker AP, et al. Radiotherapy protocol deviations and clinical outcomes: a meta-analysis of cooperative group clinical trials. *Journal of the National Cancer Institute* 2013;105(6):387-93.
145. Oostendorp LJ, Stalmeier PF, Donders AR, et al. Efficacy and safety of palliative chemotherapy for patients with advanced breast cancer pretreated with anthracyclines and taxanes: a systematic review. *The Lancet Oncology* 2011;12(11):1053-61.
146. O'Sullivan CC, Bradbury I, Campbell C, et al. Efficacy of Adjuvant Trastuzumab for Patients With Human Epidermal Growth Factor Receptor 2-Positive Early Breast Cancer and Tumors  $\leq 2$  cm: A Meta-Analysis of the Randomized Trastuzumab Trials. *Journal of clinical oncology : official journal of the American Society of Clinical Oncology* 2015;33(24):2600-8.
147. Pace LE, Keating NL. A systematic assessment of benefits and risks to guide breast cancer screening decisions. *Jama* 2014;311(13):1327-35.
148. Palumbo A, Bringhen S, Kumar SK, et al. Second primary malignancies with lenalidomide therapy for newly diagnosed myeloma: a meta-analysis of individual patient data. *The Lancet Oncology* 2014;15(3):333-42.
149. Patel SH, Wang Z, Wong WW, et al. Charged particle therapy versus photon therapy for paranasal sinus and nasal cavity malignant diseases: a systematic review and meta-analysis. *The Lancet Oncology* 2014;15(9):1027-38.
150. Peairs KS, Barone BB, Snyder CF, et al. Diabetes mellitus and breast cancer outcomes: a systematic review and meta-analysis. *Journal of clinical oncology : official journal of the American Society of Clinical Oncology* 2011;29(1):40-6.

151. Pearce CL, Templeman C, Rossing MA, et al. Association between endometriosis and risk of histological subtypes of ovarian cancer: a pooled analysis of case-control studies. *The Lancet Oncology* 2012;13(4):385-94.
152. Peto R, Davies C, Godwin J, et al. Comparisons between different polychemotherapy regimens for early breast cancer: meta-analyses of long-term outcome among 100,000 women in 123 randomised trials. *Lancet (London, England)* 2012;379(9814):432-44.
153. Pettersson A, Graff RE, Ursin G, et al. Mammographic density phenotypes and risk of breast cancer: a meta-analysis. *Journal of the National Cancer Institute* 2014;106(5).
154. Phi XA, Houssami N, Obdeijn IM, et al. Magnetic resonance imaging improves breast screening sensitivity in BRCA mutation carriers age  $\geq$  50 years: evidence from an individual patient data meta-analysis. *Journal of clinical oncology : official journal of the American Society of Clinical Oncology* 2015;33(4):349-56.
155. Pilarski R, Burt R, Kohlman W, et al. Cowden syndrome and the PTEN hamartoma tumor syndrome: systematic review and revised diagnostic criteria. *Journal of the National Cancer Institute* 2013;105(21):1607-16.
156. Playdon MC, Bracken MB, Sanft TB, et al. Weight Gain After Breast Cancer Diagnosis and All-Cause Mortality: Systematic Review and Meta-Analysis. *Journal of the National Cancer Institute* 2015;107(12):djv275.
157. Potter S, Brigic A, Whiting PF, et al. Reporting clinical outcomes of breast reconstruction: a systematic review. *Journal of the National Cancer Institute* 2011;103(1):31-46.

158. Proverbs-Singh T, Chiu SK, Liu Z, et al. Arterial thromboembolism in cancer patients treated with cisplatin: a systematic review and meta-analysis. *Journal of the National Cancer Institute* 2012;104(23):1837-40.
159. Puts MT, Hardt J, Monette J, et al. Use of geriatric assessment for older adults in the oncology setting: a systematic review. *Journal of the National Cancer Institute* 2012;104(15):1133-63.
160. Raaschou-Nielsen O, Andersen ZJ, Beelen R, et al. Air pollution and lung cancer incidence in 17 European cohorts: prospective analyses from the European Study of Cohorts for Air Pollution Effects (ESCAPE). *The Lancet Oncology* 2013;14(9):813-22.
161. Rahbari NN, Bork U, Motschall E, et al. Molecular detection of tumor cells in regional lymph nodes is associated with disease recurrence and poor survival in node-negative colorectal cancer: a systematic review and meta-analysis. *Journal of clinical oncology : official journal of the American Society of Clinical Oncology* 2012;30(1):60-70.
162. Ranpura V, Hapani S, Wu S. Treatment-related mortality with bevacizumab in cancer patients: a meta-analysis. *Jama* 2011;305(5):487-94.
163. Rao R, Euhus D, Mayo HG, et al. Axillary node interventions in breast cancer: a systematic review. *Jama* 2013;310(13):1385-94.
164. Rebolj M, Bonde J, Njor SH, et al. Human papillomavirus testing in primary cervical screening and the cut-off level for hybrid capture 2 tests: systematic review. *BMJ (Clinical research ed)* 2011;342:d2757.

165. Richards CJ, Je Y, Schutz FA, et al. Incidence and risk of congestive heart failure in patients with renal and nonrenal cell carcinoma treated with sunitinib. *Journal of clinical oncology : official journal of the American Society of Clinical Oncology* 2011;29(25):3450-6.
166. Riester M, Wei W, Waldron L, et al. Risk prediction for late-stage ovarian cancer by meta-analysis of 1525 patient samples. *Journal of the National Cancer Institute* 2014;106(5).
167. Rooney AG, Carson A, Grant R. Depression in cerebral glioma patients: a systematic review of observational studies. *Journal of the National Cancer Institute* 2011;103(1):61-76.
168. Rosmarin D, Palles C, Church D, et al. Genetic markers of toxicity from capecitabine and other fluorouracil-based regimens: investigation in the QUASAR2 study, systematic review, and meta-analysis. *Journal of clinical oncology : official journal of the American Society of Clinical Oncology* 2014;32(10):1031-9.
169. Rossi A, Chiodini P, Sun JM, et al. Six versus fewer planned cycles of first-line platinum-based chemotherapy for non-small-cell lung cancer: a systematic review and meta-analysis of individual patient data. *The Lancet Oncology* 2014;15(11):1254-62.
170. Rossi A, Di Maio M, Chiodini P, et al. Carboplatin- or cisplatin-based chemotherapy in first-line treatment of small-cell lung cancer: the COCIS meta-analysis of individual patient data. *Journal of clinical oncology : official journal of the American Society of Clinical Oncology* 2012;30(14):1692-8.

171. Rothwell PM, Fowkes FG, Belch JF, et al. Effect of daily aspirin on long-term risk of death due to cancer: analysis of individual patient data from randomised trials. *Lancet* (London, England) 2011;377(9759):31-41.
172. Rothwell PM, Price JF, Fowkes FG, et al. Short-term effects of daily aspirin on cancer incidence, mortality, and non-vascular death: analysis of the time course of risks and benefits in 51 randomised controlled trials. *Lancet* (London, England) 2012;379(9826):1602-12.
173. Rothwell PM, Wilson M, Price JF, et al. Effect of daily aspirin on risk of cancer metastasis: a study of incident cancers during randomised controlled trials. *Lancet* (London, England) 2012;379(9826):1591-601.
174. Schadendorf D, Hodi FS, Robert C, et al. Pooled Analysis of Long-Term Survival Data From Phase II and Phase III Trials of Ipilimumab in Unresectable or Metastatic Melanoma. *Journal of clinical oncology : official journal of the American Society of Clinical Oncology* 2015;33(17):1889-94.
175. Schmid D, Leitzmann MF. Television viewing and time spent sedentary in relation to cancer risk: a meta-analysis. *Journal of the National Cancer Institute* 2014;106(7).
176. Schmoll HJ, Twelves C, Sun W, et al. Effect of adjuvant capecitabine or fluorouracil, with or without oxaliplatin, on survival outcomes in stage III colon cancer and the effect of oxaliplatin on post-relapse survival: a pooled analysis of individual patient data from four randomised controlled trials. *The Lancet Oncology* 2014;15(13):1481-92.
177. Schottker B, Jorde R, Peasey A, et al. Vitamin D and mortality: meta-analysis of individual participant data from a large consortium of cohort studies from Europe and the United States. *BMJ (Clinical research ed)* 2014;348:g3656.

178. Schutz FA, Je Y, Richards CJ, et al. Meta-analysis of randomized controlled trials for the incidence and risk of treatment-related mortality in patients with cancer treated with vascular endothelial growth factor tyrosine kinase inhibitors. *Journal of clinical oncology : official journal of the American Society of Clinical Oncology* 2012;30(8):871-7.

179. Seng S, Liu Z, Chiu SK, et al. Risk of venous thromboembolism in patients with cancer treated with Cisplatin: a systematic review and meta-analysis. *Journal of clinical oncology : official journal of the American Society of Clinical Oncology* 2012;30(35):4416-26.

180. Shaikh F, Dupuis LL, Alexander S, et al. Cardioprotection and Second Malignant Neoplasms Associated With Dexrazoxane in Children Receiving Anthracycline Chemotherapy: A Systematic Review and Meta-Analysis. *Journal of the National Cancer Institute* 2016;108(4).

181. Sheinfeld Gorin S, Krebs P, Badr H, et al. Meta-analysis of psychosocial interventions to reduce pain in patients with cancer. *Journal of clinical oncology : official journal of the American Society of Clinical Oncology* 2012;30(5):539-47.

182. Sjoquist KM, Burmeister BH, Smithers BM, et al. Survival after neoadjuvant chemotherapy or chemoradiotherapy for resectable oesophageal carcinoma: an updated meta-analysis. *The Lancet Oncology* 2011;12(7):681-92.

183. Skoetz N, Trelle S, Rancea M, et al. Effect of initial treatment strategy on survival of patients with advanced-stage Hodgkin's lymphoma: a systematic review and network meta-analysis. *The Lancet Oncology* 2013;14(10):943-52.

184. Sonneveld P, Goldschmidt H, Rosinol L, et al. Bortezomib-based versus nonbortezomib-based induction treatment before autologous stem-cell transplantation in patients with previously untreated multiple myeloma: a meta-analysis of phase III randomized, controlled trials. *Journal of clinical oncology : official journal of the American Society of Clinical Oncology* 2013;31(26):3279-87.

185. Spratt DE, Gordon Spratt EA, Wu S, et al. Efficacy of skin-directed therapy for cutaneous metastases from advanced cancer: a meta-analysis. *Journal of clinical oncology : official journal of the American Society of Clinical Oncology* 2014;32(28):3144-55.

186. Tang V, Boscardin WJ, Stijacic-Cenzer I, et al. Time to benefit for colorectal cancer screening: survival meta-analysis of flexible sigmoidoscopy trials. *BMJ (Clinical research ed)* 2015;350:h1662.

187. Templeton AJ, McNamara MG, Seruga B, et al. Prognostic role of neutrophil-to-lymphocyte ratio in solid tumors: a systematic review and meta-analysis. *Journal of the National Cancer Institute* 2014;106(6):dju124.

188. Teulings HE, Limpens J, Jansen SN, et al. Vitiligo-like depigmentation in patients with stage III-IV melanoma receiving immunotherapy and its association with survival: a systematic review and meta-analysis. *Journal of clinical oncology : official journal of the American Society of Clinical Oncology* 2015;33(7):773-81.

189. Theodoratou E, Montazeri Z, Hawken S, et al. Systematic meta-analyses and field synopsis of genetic association studies in colorectal cancer. *Journal of the National Cancer Institute* 2012;104(19):1433-57.

190. Thosani N, Thosani SN, Kumar S, et al. Reduced risk of colorectal cancer with use of oral bisphosphonates: a systematic review and meta-analysis. *Journal of clinical oncology : official journal of the American Society of Clinical Oncology* 2013;31(5):623-30.
191. Trabert B, Ness RB, Lo-Ciganic WH, et al. Aspirin, nonaspirin nonsteroidal anti-inflammatory drug, and acetaminophen use and risk of invasive epithelial ovarian cancer: a pooled analysis in the Ovarian Cancer Association Consortium. *Journal of the National Cancer Institute* 2014;106(2):djt431.
192. Tsilidis KK, Kasimis JC, Lopez DS, et al. Type 2 diabetes and cancer: umbrella review of meta-analyses of observational studies. *BMJ (Clinical research ed)* 2015;350:g7607.
193. Vale CL, Burdett S, Rydzewska LH, et al. Addition of docetaxel or bisphosphonates to standard of care in men with localised or metastatic, hormone-sensitive prostate cancer: a systematic review and meta-analyses of aggregate data. *The Lancet Oncology* 2016;17(2):243-56.
194. Valery PC, Moore SP, Meiklejohn J, et al. International variations in childhood cancer in indigenous populations: a systematic review. *The Lancet Oncology* 2014;15(2):e90-e103.
195. Valsecchi ME, Silbermins D, de Rosa N, et al. Lymphatic mapping and sentinel lymph node biopsy in patients with melanoma: a meta-analysis. *Journal of clinical oncology : official journal of the American Society of Clinical Oncology* 2011;29(11):1479-87.
196. van der Pas MH, Meijer S, Hoekstra OS, et al. Sentinel-lymph-node procedure in colon and rectal cancer: a systematic review and meta-analysis. *The Lancet Oncology* 2011;12(6):540-50.



197. Vera-Badillo FE, Templeton AJ, de Gouveia P, et al. Androgen receptor expression and outcomes in early breast cancer: a systematic review and meta-analysis. *Journal of the National Cancer Institute* 2014;106(1):djt319.
198. Vidal L, Gafter-Gvili A, Salles G, et al. Rituximab maintenance for the treatment of patients with follicular lymphoma: an updated systematic review and meta-analysis of randomized trials. *Journal of the National Cancer Institute* 2011;103(23):1799-806.
199. Violette PD, Agoritsas T, Alexander P, et al. Decision aids for localized prostate cancer treatment choice: Systematic review and meta-analysis. *CA: a cancer journal for clinicians* 2015;65(3):239-51.
200. Vollset SE, Clarke R, Lewington S, et al. Effects of folic acid supplementation on overall and site-specific cancer incidence during the randomised trials: meta-analyses of data on 50,000 individuals. *Lancet (London, England)* 2013;381(9871):1029-36.
201. Vora A, Andreano A, Pui CH, et al. Influence of Cranial Radiotherapy on Outcome in Children With Acute Lymphoblastic Leukemia Treated With Contemporary Therapy. *Journal of clinical oncology : official journal of the American Society of Clinical Oncology* 2016.
202. Waldron L, Haibe-Kains B, Culhane AC, et al. Comparative meta-analysis of prognostic gene signatures for late-stage ovarian cancer. *Journal of the National Cancer Institute* 2014;106(5).
203. Wang HT, Yao YH, Li BG, et al. Neuroendocrine Prostate Cancer (NEPC) progressing from conventional prostatic adenocarcinoma: factors associated with time to development of NEPC and survival from NEPC diagnosis-a systematic review and pooled

analysis. *Journal of clinical oncology : official journal of the American Society of Clinical Oncology* 2014;32(30):3383-90.

204. Wang SY, Chu H, Shamliyan T, et al. Network meta-analysis of margin threshold for women with ductal carcinoma in situ. *Journal of the National Cancer Institute* 2012;104(7):507-16.

205. Wang X, Ouyang Y, Liu J, et al. Fruit and vegetable consumption and mortality from all causes, cardiovascular disease, and cancer: systematic review and dose-response meta-analysis of prospective cohort studies. *BMJ (Clinical research ed)* 2014;349:g4490.

206. Wang Y, Yang F, Shen Y, et al. Maintenance Therapy With Immunomodulatory Drugs in Multiple Myeloma: A Meta-Analysis and Systematic Review. *Journal of the National Cancer Institute* 2016;108(3).

207. Wehner MR, Shive ML, Chren MM, et al. Indoor tanning and non-melanoma skin cancer: systematic review and meta-analysis. *BMJ (Clinical research ed)* 2012;345:e5909.

208. Winter AC, Rice MS, Fortner RT, et al. Migraine and breast cancer risk: a prospective cohort study and meta-analysis. *Journal of the National Cancer Institute* 2015;107(1):381.

209. Xing Y, Bronstein Y, Ross MI, et al. Contemporary diagnostic imaging modalities for the staging and surveillance of melanoma patients: a meta-analysis. *Journal of the National Cancer Institute* 2011;103(2):129-42.

210. Yang XR, Chang-Claude J, Goode EL, et al. Associations of breast cancer risk factors with tumor subtypes: a pooled analysis from the Breast Cancer Association Consortium studies. *Journal of the National Cancer Institute* 2011;103(3):250-63.

211. Yothers G, Sargent DJ, Wolmark N, et al. Outcomes among black patients with stage II and III colon cancer receiving chemotherapy: an analysis of ACCENT adjuvant trials. *Journal of the National Cancer Institute* 2011;103(20):1498-506.

212. Zhang B, Beeghly-Fadiel A, Long J, et al. Genetic variants associated with breast-cancer risk: comprehensive research synopsis, meta-analysis, and epidemiological evidence. *The Lancet Oncology* 2011;12(5):477-88.

213. Zhang B, Shu XO, Delahanty RJ, et al. Height and Breast Cancer Risk: Evidence From Prospective Studies and Mendelian Randomization. *Journal of the National Cancer Institute* 2015;107(11).

214. Zhao FH, Lewkowitz AK, Chen F, et al. Pooled analysis of a self-sampling HPV DNA Test as a cervical cancer primary screening method. *Journal of the National Cancer Institute* 2012;104(3):178-88.

215. Zheng JS, Hu XJ, Zhao YM, et al. Intake of fish and marine n-3 polyunsaturated fatty acids and risk of breast cancer: meta-analysis of data from 21 independent prospective cohort studies. *BMJ (Clinical research ed)* 2013;346:f3706.
